# Supplementary material for: Extracted Spectral Signatures from the Water Column as a Tool for Characterization of Marine Microbial Community
Source: Preprints.org preprint supplement (doi:10.20944/preprints202401.0647.v1), 2024-01-09
Supplement: Supplementary file 1 [file supplementary]

## Sheet: RawDataAllCurves
EU(353.25)	EU(356.58)	EU(359.91)	EU(363.25)	EU(366.58)	EU(369.91)	EU(373.25)	EU(376.58)	EU(379.92)	EU(383.25)	EU(386.59)	EU(389.93)	EU(393.26)	EU(396.60)	EU(399.94)	EU(403.28)	EU(406.62)	EU(409.96)	EU(413.30)	EU(416.64)	EU(419.98)	EU(423.32)	EU(426.66)	EU(430.00)	EU(433.34)	EU(436.68)	EU(440.03)	EU(443.37)	EU(446.71)	EU(450.05)	EU(453.40)	EU(456.74)	EU(460.08)	EU(463.43)	EU(466.77)	EU(470.12)	EU(473.46)	EU(476.80)	EU(480.15)	EU(483.49)	EU(486.84)	EU(490.18)	EU(493.53)	EU(496.87)	EU(500.22)	EU(503.56)	EU(506.91)	EU(510.26)	EU(513.60)	EU(516.95)
0.456547	0.458038	0.47778	0.518599	0.564137	0.582791	0.587866	0.609949	0.61322	0.601776	0.644728	0.697794	0.756399	0.905136	1.14174	1.31192	1.39782	1.4891	1.56948	1.60832	1.62388	1.62138	1.59315	1.61627	1.72829	1.88635	2.06434	2.2656	2.47654	2.64685	2.76473	2.83507	2.89085	2.88941	2.85953	2.83456	2.82065	2.79842	2.73527	2.59756	2.4607	2.38685	2.32675	2.23199	2.11718	2.01617	1.92959	1.83395	1.70588	1.59233
0.464601	0.473959	0.482113	0.52664	0.576874	0.592427	0.601115	0.620352	0.622348	0.609256	0.651541	0.703641	0.751476	0.903866	1.1368	1.30451	1.39115	1.47761	1.55765	1.59897	1.60691	1.60523	1.57787	1.59607	1.70833	1.86617	2.03293	2.23269	2.43911	2.60632	2.71832	2.78686	2.84184	2.84364	2.81355	2.7849	2.77396	2.75446	2.69308	2.55425	2.42018	2.35279	2.29406	2.2007	2.08998	1.99159	1.90817	1.81509	1.69215	1.57964
0.479814	0.480568	0.499446	0.548512	0.603019	0.620302	0.626915	0.64948	0.650072	0.639174	0.677866	0.733464	0.788944	0.949365	1.1912	1.36968	1.4653	1.5565	1.638	1.68247	1.69338	1.68878	1.66466	1.6828	1.79839	1.96814	2.147	2.35813	2.58056	2.75735	2.87628	2.95295	3.00971	3.00662	2.97909	2.94969	2.93925	2.92386	2.85465	2.71054	2.57398	2.49833	2.43763	2.34103	2.2195	2.11504	2.02641	1.9224	1.79009	1.67326
0.424927	0.430701	0.440948	0.48354	0.529948	0.547345	0.553698	0.566951	0.567577	0.563077	0.603537	0.649258	0.699513	0.842353	1.05836	1.22081	1.30206	1.38592	1.46246	1.50244	1.51563	1.51361	1.49168	1.51162	1.62237	1.77283	1.93792	2.13141	2.33363	2.49681	2.60576	2.67362	2.7275	2.73096	2.70203	2.67828	2.6696	2.64828	2.58954	2.45839	2.33099	2.26411	2.20782	2.12186	2.00686	1.9117	1.83034	1.73717	1.6187	1.50695
0.425226	0.424392	0.440638	0.479358	0.531624	0.548722	0.554047	0.582902	0.57772	0.57511	0.613757	0.671187	0.726315	0.876414	1.10806	1.27595	1.36953	1.46462	1.54723	1.59112	1.60482	1.60849	1.58704	1.61096	1.72753	1.89236	2.07246	2.28118	2.4989	2.6753	2.79764	2.87385	2.93429	2.93745	2.90795	2.88753	2.88003	2.86148	2.79362	2.65669	2.52092	2.44628	2.38803	2.29364	2.17219	2.06884	1.98043	1.8754	1.74139	1.619
0.376603	0.379332	0.388021	0.426287	0.466261	0.477486	0.486408	0.498639	0.506721	0.503241	0.533544	0.58201	0.628952	0.755422	0.944128	1.08982	1.16387	1.24358	1.31834	1.35296	1.36703	1.37121	1.35232	1.37356	1.47516	1.61588	1.76697	1.94413	2.12705	2.27663	2.37979	2.44559	2.50019	2.50282	2.47671	2.46069	2.45059	2.43729	2.38163	2.26372	2.1492	2.09014	2.04198	1.95861	1.85844	1.76898	1.6931	1.60504	1.48551	1.38209
0.395694	0.393451	0.413401	0.448802	0.494082	0.508458	0.518833	0.537823	0.54932	0.541939	0.574425	0.631423	0.678181	0.824306	1.04117	1.1988	1.28994	1.38121	1.46422	1.50728	1.52652	1.53038	1.5143	1.5382	1.6524	1.8118	1.98261	2.17943	2.3905	2.55686	2.67478	2.74568	2.80448	2.80311	2.77719	2.75625	2.74959	2.73265	2.67008	2.53432	2.4065	2.33705	2.27921	2.18986	2.07214	1.97055	1.88275	1.78029	1.64883	1.52983
0.427612	0.424092	0.438162	0.472604	0.518551	0.538398	0.54533	0.566604	0.571972	0.567955	0.607254	0.667093	0.719204	0.870567	1.10029	1.26942	1.36388	1.46123	1.54564	1.58995	1.60995	1.61269	1.5904	1.61475	1.73408	1.89913	2.07809	2.28341	2.49938	2.6758	2.79274	2.86801	2.92734	2.92539	2.89606	2.87329	2.86287	2.84474	2.77845	2.63264	2.49667	2.4209	2.35992	2.26529	2.14257	2.03882	1.95115	1.84504	1.71099	1.59233
0.478024	0.475761	0.501612	0.547869	0.606371	0.636132	0.645742	0.676873	0.686586	0.697059	0.75715	0.842231	0.925416	1.14585	1.47667	1.72277	1.86551	2.01177	2.13869	2.21423	2.24712	2.25637	2.23403	2.28002	2.45553	2.7036	2.97177	3.28105	3.60813	3.87281	4.05659	4.17252	4.25885	4.26229	4.21895	4.18209	4.16407	4.1381	4.03529	3.82619	3.62111	3.50315	3.4101	3.2645	3.07731	2.9131	2.77386	2.61038	2.40651	2.22042
0.49622	0.502798	0.523897	0.5736	0.634527	0.662286	0.676424	0.715364	0.724452	0.723075	0.796172	0.886381	0.970542	1.21117	1.55723	1.8202	1.97481	2.12286	2.25754	2.33347	2.36322	2.37672	2.35352	2.39819	2.5843	2.84623	3.12725	3.4588	3.80224	4.08455	4.27632	4.39763	4.48998	4.49462	4.44724	4.40836	4.38927	4.35907	4.25254	4.03223	3.81576	3.68934	3.59252	3.43271	3.23494	3.06141	2.91081	2.73683	2.51938	2.31887
0.41568	0.410874	0.428567	0.467136	0.51654	0.539086	0.551257	0.580821	0.59192	0.6008	0.650612	0.716506	0.78703	0.976308	1.25221	1.45555	1.57419	1.69734	1.80154	1.86318	1.88874	1.89811	1.88257	1.91974	2.06874	2.27357	2.50297	2.76864	3.0459	3.27033	3.42374	3.52379	3.59431	3.59515	3.56048	3.52396	3.50738	3.47874	3.38769	3.20776	3.03407	2.93143	2.85176	2.72299	2.56438	2.42829	2.30631	2.16767	1.99754	1.83747
0.386745	0.38564	0.398854	0.435615	0.476652	0.49366	0.502097	0.538863	0.544587	0.545191	0.589291	0.649258	0.712094	0.880989	1.12219	1.30625	1.41236	1.51791	1.61293	1.66894	1.68985	1.70058	1.68697	1.72138	1.85295	2.03853	2.24295	2.47992	2.72898	2.92956	3.06765	3.15421	3.21947	3.22149	3.18535	3.1553	3.1399	3.11305	3.03155	2.87161	2.71622	2.62636	2.55514	2.44109	2.30201	2.18154	2.07368	1.95194	1.79749	1.6577
2.5312	2.50049	2.528	2.74373	2.98757	3.00722	2.94755	2.99149	2.91191	2.75655	2.85662	3.01084	3.11307	3.63	4.47127	5.0303	5.24908	5.46413	5.65671	5.72441	5.70408	5.62109	5.42406	5.35013	5.59094	5.95828	6.28708	6.64937	7.02139	7.29112	7.44124	7.514	7.57945	7.5356	7.43144	7.35452	7.33718	7.32432	7.23106	6.96925	6.71451	6.64019	6.61023	6.47121	6.25302	6.08974	5.98541	5.8488	5.61292	5.39957
8.67178	8.54696	8.57702	9.30216	10.0987	10.111	9.82653	9.89234	9.55906	8.92378	9.15032	9.50629	9.67978	11.0697	13.4502	14.949	15.3917	15.8556	16.2977	16.4424	16.3765	16.1196	15.4825	15.1551	15.6739	16.4905	17.1058	17.7151	18.3106	18.6725	18.7633	18.7107	18.7134	18.499	18.1837	17.9608	17.9026	17.9113	17.7754	17.2416	16.753	16.6895	16.7559	16.5551	16.1277	15.8402	15.7466	15.6006	15.1821	14.8323
2.07914	2.08689	2.12406	2.33428	2.5542	2.60785	2.56205	2.60624	2.53132	2.4058	2.47361	2.63212	2.72694	3.17216	3.9037	4.39676	4.61992	4.87791	5.16741	5.39182	5.56803	5.68484	5.63544	5.6692	5.98049	6.39885	6.74096	7.04834	7.33252	7.50191	7.54533	7.56146	7.59425	7.55306	7.50858	7.49016	7.53122	7.60066	7.56973	7.36642	7.20364	7.20971	7.30047	7.30346	7.25545	7.30662	7.46988	7.6092	7.65221	7.76564
8.83018	8.65975	8.62509	9.30753	10.0772	10.0687	9.7234	9.77305	9.41757	8.7693	8.96993	9.30898	9.457	10.815	13.1329	14.5781	14.9597	15.3344	15.6932	15.7397	15.6007	15.2782	14.601	14.2296	14.6903	15.4437	16.0193	16.5901	17.1494	17.4763	17.5596	17.5013	17.5039	17.3035	17.0177	16.8221	16.7881	16.7918	16.662	16.1671	15.6927	15.6428	15.7335	15.5728	15.2249	15.0447	15.0117	14.9437	14.6112	14.3698
15.067	14.7003	14.5603	15.6478	16.7958	16.6816	16.1191	16.0536	15.4248	14.2834	14.495	15.0104	15.1883	17.256	20.9037	23.0985	23.6122	24.1355	24.5837	24.5524	24.1813	23.559	22.3943	21.711	22.3058	23.3446	24.0932	24.8365	25.5761	25.9897	26.0118	25.8668	25.7877	25.4132	24.9005	24.5308	24.3849	24.3355	24.0656	23.2589	22.536	22.3956	22.4323	22.1191	21.5095	21.1137	20.9187	20.6283	19.9822	19.4405
15.3384	14.9379	14.7939	15.8746	17.068	16.9548	16.3089	16.3088	15.6436	14.4687	14.7388	15.2099	15.4111	17.5488	21.2913	23.5084	24.0542	24.5955	25.0851	25.0275	24.6436	24.0192	22.7976	22.0969	22.6897	23.7802	24.5567	25.3416	26.1093	26.5359	26.6096	26.4594	26.3549	25.9955	25.4716	25.0951	24.9915	24.9382	24.6259	23.8135	23.0643	22.9296	22.9455	22.6501	22.0021	21.5992	21.3991	21.0993	20.4058	19.8364
13.6656	13.3518	13.2116	14.2355	15.2955	15.2314	14.6912	14.6721	14.1695	13.1263	13.3835	13.9001	14.0743	16.103	19.6181	21.7682	22.3345	22.9371	23.4335	23.4589	23.1601	22.583	21.5127	20.8794	21.49	22.5357	23.2966	24.0786	24.8727	25.3144	25.3891	25.2913	25.258	24.9292	24.4578	24.1338	24.0124	24.0104	23.7722	22.9545	22.2675	22.1624	22.2303	21.9537	21.3625	20.9812	20.8131	20.5392	19.8742	19.3166
13.9376	13.6017	13.5113	14.4568	15.5154	15.4158	14.8697	14.9079	14.2939	13.2538	13.5594	14.0778	14.3784	16.5239	20.2512	22.6208	23.4303	24.2054	24.8746	24.986	24.7192	24.1558	23.0237	22.3885	23.0567	24.2287	25.0993	25.9826	26.8728	27.4093	27.506	27.4683	27.4588	27.1289	26.6547	26.3537	26.2877	26.3124	26.0558	25.1864	24.4835	24.3947	24.4972	24.2585	23.6996	23.3342	23.1905	22.8541	22.1451	21.5183
11.8209	11.5205	11.3967	12.2928	13.2522	13.1528	12.7582	12.794	12.3384	11.5783	11.887	12.4428	12.8841	15.1289	18.838	21.416	22.5446	23.6451	24.6104	24.9446	24.8499	24.4453	23.4002	22.8624	23.6943	24.9508	25.9718	27.0052	28.0096	28.6692	28.8858	28.8903	28.9964	28.7318	28.337	28.0805	28.1249	28.2505	28.0353	27.1786	26.3961	26.4021	26.5846	26.3638	25.8481	25.5542	25.4697	25.19	24.4192	23.7838
11.1456	10.9029	10.8073	11.6264	12.5362	12.4811	12.1446	12.1366	11.7325	11.0502	11.394	11.9797	12.4531	14.6226	18.2934	20.8528	22.0404	23.2022	24.1851	24.6079	24.5527	24.1794	23.1729	22.6449	23.4992	24.7795	25.7956	26.8602	27.8851	28.5474	28.8115	28.8354	28.9658	28.7514	28.3775	28.1736	28.2526	28.3601	28.198	27.3657	26.5953	26.6	26.8057	26.6005	26.0959	25.8402	25.7427	25.4773	24.7119	24.1101
11.5775	11.321	11.2629	12.1461	13.027	12.9463	12.6076	12.6303	12.2491	11.5211	11.8821	12.5434	13.0307	15.3506	19.1451	21.885	23.1168	24.3515	25.4242	25.7997	25.794	25.4019	24.3464	23.8466	24.7269	26.0955	27.1995	28.3458	29.4276	30.1778	30.4627	30.5347	30.6828	30.427	30.0654	29.8601	29.9663	30.113	29.9227	29.0192	28.2398	28.2835	28.4875	28.3092	27.785	27.4893	27.413	27.1012	26.2994	25.6634
12.2624	11.9915	11.9117	12.8074	13.8153	13.7447	13.3272	13.4348	13.0064	12.1403	12.5312	13.1703	13.6127	16.0033	19.929	22.6819	23.8958	25.1182	26.1546	26.5399	26.4589	26.0367	24.9564	24.3886	25.2646	26.6672	27.752	28.8635	29.9759	30.6741	30.9325	31.0028	31.1263	30.8714	30.4653	30.1852	30.2698	30.4105	30.1961	29.2986	28.5132	28.484	28.72	28.4901	27.941	27.6435	27.5501	27.2498	26.463	25.8056
15.9446	15.5531	15.4228	16.5257	17.7867	17.6706	17.1178	17.1243	16.5334	15.4495	15.8413	16.5479	17.074	19.869	24.5606	27.7455	29.016	30.2756	31.3384	31.6437	31.4589	30.8595	29.4845	28.7484	29.7097	31.2793	32.5025	33.7234	34.9197	35.6858	35.9197	35.9127	35.9587	35.5587	34.9808	34.6056	34.5841	34.6277	34.3218	33.2157	32.2122	32.157	32.3161	31.9795	31.2561	30.8228	30.6621	30.2912	29.3656	28.5805
17.6365	17.2162	17.0868	18.3474	19.7228	19.6005	18.9615	18.9885	18.3185	17.0391	17.4988	18.2648	18.7674	21.7744	26.8651	30.2529	31.547	32.7986	33.8816	34.1875	33.9211	33.2448	31.724	30.927	31.9408	33.5848	34.8714	36.1807	37.4499	38.2664	38.493	38.4328	38.4751	38.0281	37.3693	36.9311	36.8813	36.8621	36.536	35.3212	34.2459	34.1027	34.2278	33.8072	33.0347	32.519	32.2969	31.864	30.839	29.9842
18.8154	18.3601	18.2258	19.5851	21.093	20.9578	20.2306	20.3062	19.56	18.189	18.6683	19.4974	19.9817	23.1714	28.527	32.0803	33.4445	34.7071	35.8116	36.0968	35.8043	35.0785	33.4746	32.6124	33.6659	35.3961	36.7253	38.0669	39.4007	40.2197	40.4655	40.3778	40.3881	39.9371	39.2208	38.7482	38.6829	38.7205	38.3407	37.0788	35.9411	35.7528	35.892	35.4541	34.5919	34.0421	33.7752	33.2993	32.237	31.323
17.7534	17.3267	17.1833	18.471	19.8971	19.829	19.2013	19.2521	18.6107	17.3825	17.9076	18.784	19.4129	22.6874	28.1841	31.96	33.5495	35.1243	36.4869	36.9438	36.774	36.1158	34.5418	33.7303	34.8546	36.7022	38.1642	39.6187	41.0637	42.0036	42.2732	42.224	42.3163	41.8615	41.159	40.7487	40.6904	40.7642	40.3922	39.0749	37.9306	37.7859	37.9465	37.5209	36.6388	36.0961	35.8556	35.3924	34.2345	33.3082
16.7392	16.3822	16.3018	17.5137	18.8808	18.8269	18.2642	18.3865	17.8317	16.6645	17.204	18.1057	18.7587	22.0814	27.5547	31.3444	33.0695	34.7432	36.1464	36.7074	36.6049	35.9916	34.5027	33.7388	34.8985	36.8316	38.338	39.8781	41.4254	42.3993	42.7241	42.7291	42.8766	42.4512	41.8036	41.4141	41.4236	41.5121	41.1618	39.8615	38.6975	38.5775	38.7931	38.3908	37.5565	37.0401	36.8507	36.394	35.2936	34.3667
17.4981	17.0575	17.0075	18.2754	19.6959	19.6418	19.0312	19.1466	18.5133	17.3149	17.9299	18.8238	19.5332	22.9253	28.5741	32.4569	34.2008	35.9226	37.3615	37.8991	37.7963	37.1345	35.5907	34.7983	36.0323	37.9948	39.5544	41.1424	42.7294	43.7346	44.0891	44.11	44.2001	43.7565	43.0888	42.6866	42.6622	42.7713	42.409	41.0605	39.8641	39.7432	39.9202	39.5481	38.6615	38.1383	37.9372	37.4588	36.3289	35.3781
17.7988	17.3748	17.2427	18.5456	19.9936	19.9446	19.2906	19.4102	18.8108	17.6062	18.1529	19.0881	19.7848	23.2446	28.9887	32.9225	34.7083	36.4408	37.9294	38.4763	38.31	37.6824	36.1115	35.2759	36.5346	38.5271	40.0994	41.7237	43.336	44.3672	44.7047	44.7345	44.8452	44.4063	43.7124	43.2645	43.2746	43.361	42.9972	41.6363	40.407	40.2996	40.4875	40.0946	39.2153	38.7104	38.5141	38.0478	36.881	35.9189
17.1306	16.7451	16.6386	17.8997	19.3232	19.2564	18.6853	18.7943	18.1671	17.0053	17.541	18.4589	19.1787	22.541	28.1143	31.9809	33.7338	35.4195	36.8924	37.4395	37.3018	36.6811	35.1653	34.3718	35.6008	37.5647	39.1093	40.6858	42.2459	43.2384	43.6314	43.6584	43.7636	43.3694	42.6706	42.2296	42.2406	42.3507	41.9768	40.6573	39.4748	39.346	39.5538	39.1429	38.2686	37.7993	37.5933	37.126	35.9942	35.0549
16.5149	16.1659	16.0542	17.3542	18.677	18.6066	18.1247	18.1785	17.6288	16.5396	17.0776	17.9654	18.6515	21.9309	27.3701	31.1352	32.8044	34.4389	35.8455	36.3653	36.2603	35.6437	34.1604	33.3888	34.5815	36.4656	38.0167	39.5182	41.03	42.0407	42.3745	42.3983	42.5096	42.0906	41.4414	41.0349	40.9952	41.0915	40.7657	39.453	38.2847	38.2061	38.3622	37.9794	37.1188	36.5987	36.3869	35.9359	34.8491	33.9107
17.1019	16.7379	16.6311	17.8946	19.3715	19.3114	18.716	18.8221	18.1914	17.0677	17.6252	18.5548	19.2685	22.6426	28.218	32.1396	33.8841	35.5973	37.086	37.6359	37.5107	36.9159	35.3413	34.5808	35.7824	37.7237	39.2456	40.8066	42.3755	43.3456	43.6948	43.727	43.8122	43.3791	42.6888	42.2935	42.2502	42.371	41.9795	40.6362	39.437	39.3255	39.507	39.0822	38.184	37.6475	37.4288	36.9486	35.8026	34.8541
17.448	16.9975	16.8936	18.2162	19.6289	19.6005	19.0033	19.0884	18.5079	17.4137	17.9547	18.9057	19.6513	23.1368	28.9792	33.0916	35.0057	36.9484	38.5695	39.1657	39.112	38.4564	36.8352	36.0317	37.2954	39.2997	40.8782	42.4868	44.0619	45.0461	45.3838	45.3865	45.4847	45.0534	44.3389	43.9175	43.9062	44.0481	43.6855	42.2885	41.0554	40.982	41.1736	40.7575	39.8512	39.3154	39.1059	38.5979	37.3826	36.4084
17.4838	17.084	16.9828	18.2857	19.7522	19.6803	19.034	19.2104	18.589	17.4658	18.0687	18.9665	19.8089	23.3747	29.2543	33.4299	35.4066	37.3295	39.0075	39.6547	39.5821	38.967	37.3486	36.4983	37.7892	39.8159	41.4395	43.0973	44.6776	45.6681	46.021	46.0042	46.1242	45.6725	44.957	44.5357	44.5584	44.6798	44.2951	42.9354	41.6804	41.5976	41.8218	41.3796	40.4799	39.9369	39.7194	39.218	37.9939	36.9868
17.4694	17.0816	16.9976	18.3191	19.7174	19.6913	19.1009	19.2104	18.5998	17.4137	18.0167	18.9665	19.7235	23.2791	29.1356	33.245	35.1593	37.0824	38.6825	39.29	39.2452	38.5868	36.9892	36.1495	37.4198	39.434	41.0158	42.6102	44.2239	45.2115	45.5323	45.5677	45.6432	45.1805	44.4969	44.0467	44.0628	44.1523	43.7909	42.4176	41.1934	41.0694	41.2747	40.8517	39.9214	39.4284	39.1733	38.6556	37.4859	36.5036
17.3167	16.8965	16.7995	18.0979	19.5082	19.4436	18.8611	18.9719	18.3835	17.2628	17.811	18.8168	19.5857	23.1185	28.9415	33.062	34.9896	36.9198	38.5469	39.1831	39.1107	38.5011	36.8853	36.0584	37.3344	39.3711	40.972	42.5924	44.1682	45.1904	45.5431	45.5622	45.6835	45.2448	44.5137	44.1189	44.0985	44.2253	43.8349	42.4466	41.2338	41.1375	41.3404	40.8976	39.9854	39.4684	39.2247	38.7166	37.516	36.5255
16.9039	16.5048	16.4306	17.735	19.1114	19.0499	18.5431	18.6945	18.1211	17.0313	17.6425	18.6881	19.5419	23.1185	29.1526	33.4456	35.5649	37.6774	39.4553	40.2079	40.2214	39.6453	38.0283	37.2346	38.5768	40.7167	42.4121	44.0881	45.7703	46.834	47.2037	47.2629	47.381	46.9624	46.2673	45.8373	45.8876	46.062	45.701	44.2595	43.0318	42.9419	43.1953	42.7649	41.8462	41.3011	41.0709	40.5435	39.2821	38.2712
16.6879	16.3023	16.2168	17.4426	18.8192	18.7512	18.164	18.2367	17.6066	16.455	16.802	17.5784	18.1017	21.1113	26.0085	29.2627	30.5303	31.7636	32.905	33.1724	32.9485	32.2979	30.813	29.999	30.8956	32.4291	33.6219	34.7793	35.8449	36.5081	36.6806	36.5352	36.5497	36.0315	35.3874	34.984	34.8484	34.8525	34.4806	33.3024	32.2857	32.1494	32.199	31.7763	30.9901	30.4248	30.0897	29.5517	28.5252	27.6821
16.3539	15.9658	15.9048	17.1081	18.3633	18.2721	17.7122	17.8206	17.1089	15.9503	16.3263	17.0404	17.5547	20.2166	24.8742	27.8608	28.9593	29.9772	30.8649	31.1095	30.8194	30.1586	28.7348	27.9357	28.7596	30.1767	31.2367	32.2507	33.2835	33.7846	33.8616	33.6993	33.6496	33.1694	32.5626	32.0944	31.9868	31.931	31.5914	30.5171	29.5827	29.3812	29.4192	28.9363	28.1053	27.5904	27.2222	26.6922	25.7636	24.9752
16.1104	15.6774	15.6175	16.7787	18.0522	17.9473	17.383	17.3601	16.7519	15.6017	15.9299	16.61	16.9071	19.3625	23.6268	26.3333	27.1685	27.9859	28.6721	28.7874	28.4878	27.8255	26.4732	25.6757	26.3847	27.6187	28.5365	29.4169	30.2893	30.7382	30.7268	30.5505	30.466	29.9886	29.4302	29.0048	28.8149	28.7499	28.4035	27.3997	26.5282	26.302	26.2451	25.7938	25.015	24.4499	24.0736	23.5642	22.6489	21.9482
14.9745	14.6585	14.4835	15.6825	16.9421	16.824	16.2395	16.2283	15.5726	14.5871	14.8992	15.4124	15.7562	18.0286	22.1231	24.6315	25.3357	26.097	26.7563	26.818	26.5278	25.8775	24.6004	23.8992	24.5852	25.6866	26.5713	27.3768	28.1687	28.6287	28.6368	28.4559	28.4001	27.9427	27.3885	26.9794	26.7937	26.7427	26.4507	25.5235	24.6508	24.4693	24.4079	23.9698	23.2546	22.6655	22.3211	21.8339	20.97	20.2684
13.7336	13.3992	13.2603	14.3136	15.4994	15.3704	14.8504	14.8357	14.2311	13.3695	13.601	14.1213	14.4391	16.5563	20.1635	22.3821	22.9696	23.6267	24.1566	24.2047	23.8709	23.2785	22.1164	21.4957	22.0469	23.0595	23.781	24.5201	25.2107	25.5902	25.6153	25.4416	25.3777	24.9911	24.4799	24.0815	23.9513	23.8375	23.5669	22.7145	21.953	21.7551	21.7266	21.2735	20.5899	20.0029	19.6821	19.2184	18.3741	17.7163
13.5666	13.2886	13.1563	14.2724	15.3868	15.3429	14.75	14.8024	14.2851	13.2654	13.5762	14.0745	14.3428	16.4303	20.1258	22.3194	22.9372	23.5273	24.0605	24.0978	23.7786	23.1791	22.0234	21.3791	21.9689	22.9758	23.716	24.4107	25.133	25.4922	25.5208	25.3428	25.2553	24.8402	24.3428	23.9509	23.7508	23.6941	23.3508	22.5195	21.7864	21.606	21.5346	21.1669	20.3771	19.8711	19.4856	19.0143	18.1954	17.5573
12.8889	12.6013	12.5274	13.5674	14.6467	14.6546	14.0918	14.1755	13.7226	12.7711	13.0262	13.5739	13.844	15.8568	19.2929	21.4719	22.0645	22.6808	23.1761	23.232	22.9229	22.3368	21.2949	20.6816	21.2544	22.2217	22.9409	23.6781	24.3138	24.6823	24.6568	24.5632	24.4796	24.08	23.6268	23.2119	23.0286	23.0259	22.7212	21.8791	21.0885	20.9326	20.8826	20.5102	19.7919	19.2825	18.9121	18.4154	17.6638	17.0092
11.2232	10.9767	10.9872	11.8279	12.8501	12.8486	12.4517	12.4889	12.1646	11.4183	11.7031	12.1377	12.3387	14.1406	17.2692	19.1424	19.6434	20.1623	20.6131	20.6668	20.4197	19.9342	19.0308	18.458	19.0063	19.9051	20.6007	21.2056	21.8769	22.197	22.2266	22.0815	22.0467	21.7098	21.3195	20.928	20.8151	20.778	20.5684	19.8448	19.198	19.0075	18.9418	18.5846	17.9107	17.378	17.0225	16.5519	15.8169	15.252
9.23886	9.10763	9.08892	9.8792	10.694	10.7218	10.4404	10.4832	10.1908	9.52829	9.74885	10.1576	10.357	11.7269	14.2177	15.6985	16.0102	16.3412	16.6531	16.6436	16.4614	16.0918	15.3429	14.9339	15.3552	16.0876	16.641	17.1772	17.6684	17.9656	18.0217	17.9217	17.9148	17.6859	17.3217	17.0766	17.0013	16.965	16.7548	16.1874	15.6598	15.4835	15.4096	15.048	14.4686	13.9764	13.5974	13.1276	12.49	11.9897
8.96204	8.89375	8.92797	9.74025	10.5519	10.6062	10.3093	10.4083	10.0934	9.42683	9.69682	10.0897	10.2608	11.7168	14.1838	15.6235	15.9537	16.299	16.5924	16.6343	16.4397	16.0868	15.3515	14.9363	15.4015	16.1665	16.726	17.2561	17.7928	18.0939	18.1661	18.0988	18.0635	17.89	17.5637	17.3239	17.2402	17.2315	17.0229	16.4536	15.9215	15.7598	15.6838	15.3293	14.7587	14.3072	13.9287	13.4492	12.8118	12.3056
2.06782	2.07576	2.22267	2.51484	2.78619	2.93615	2.91782	3.09032	3.09088	2.99309	3.1237	3.36492	3.51539	4.1136	5.04127	5.60434	5.83123	6.0715	6.29403	6.41737	6.45375	6.44257	6.25509	6.19366	6.46617	6.85977	7.19007	7.49552	7.78994	7.94486	8.00813	8.10057	8.18862	8.18984	8.10904	8.1093	8.1268	8.17763	8.13667	7.84987	7.5926	7.47322	7.3582	7.06556	6.65815	6.28307	5.86533	5.37544	4.85729	4.55511
1.58278	1.68916	1.80836	2.0358	2.32493	2.44679	2.49371	2.6423	2.64627	2.5632	2.74119	2.94555	3.06717	3.58496	4.3889	4.89632	5.08701	5.28159	5.50791	5.62229	5.69613	5.68981	5.53703	5.5088	5.77872	6.15426	6.44218	6.72973	7.00069	7.15386	7.23886	7.29791	7.39127	7.40143	7.36455	7.35401	7.38635	7.42078	7.36432	7.15166	6.91395	6.79011	6.67753	6.41252	6.02706	5.6493	5.21412	4.75525	4.28356	3.95839
1.50641	1.57981	1.6796	1.93287	2.22571	2.30914	2.36262	2.4925	2.5232	2.46824	2.61484	2.79819	2.92823	3.4538	4.22026	4.71324	4.90842	5.10686	5.32282	5.43724	5.49501	5.50284	5.3775	5.33747	5.59645	5.96943	6.24278	6.55103	6.79978	6.95271	7.03905	7.11398	7.2161	7.21346	7.18485	7.15952	7.20647	7.24021	7.18558	6.97181	6.73687	6.63975	6.52338	6.25205	5.86988	5.49334	5.09017	4.61716	4.1528	3.84857
1.48613	1.54737	1.6437	1.90328	2.1627	2.26371	2.34728	2.43286	2.47046	2.41361	2.59501	2.76544	2.90745	3.39483	4.192	4.70103	4.86882	5.08201	5.29245	5.41988	5.48668	5.4842	5.34694	5.34416	5.5934	5.94171	6.23903	6.53513	6.79006	6.95403	7.02285	7.0982	7.21193	7.22045	7.18835	7.16508	7.21128	7.24359	7.21292	6.97972	6.73167	6.63782	6.52211	6.26073	5.88016	5.49745	5.09417	4.61993	4.15549	3.84648
1.58516	1.66513	1.80836	2.0358	2.30884	2.4344	2.50208	2.60347	2.65032	2.5645	2.71642	2.92801	3.05842	3.57378	4.39079	4.91376	5.10156	5.30493	5.51639	5.65636	5.71471	5.71652	5.58777	5.54647	5.81408	6.19184	6.48906	6.78761	7.04801	7.21341	7.29489	7.37615	7.47052	7.47829	7.43866	7.42347	7.45432	7.48975	7.44035	7.21095	6.9823	6.88521	6.76977	6.50298	6.1129	5.73287	5.31466	4.82457	4.36266	4.05201
1.52789	1.59063	1.71674	1.97276	2.22973	2.33254	2.40446	2.52857	2.5489	2.50857	2.64828	2.85433	2.99715	3.50667	4.31542	4.80914	4.9957	5.21456	5.41819	5.55014	5.62439	5.62272	5.47897	5.4602	5.72264	6.09018	6.39592	6.69984	6.94949	7.11217	7.19701	7.27046	7.37598	7.38536	7.34077	7.33109	7.36781	7.42213	7.37365	7.1319	6.89767	6.79911	6.68827	6.40756	6.02827	5.64753	5.23126	4.75359	4.28195	3.98245
1.60783	1.69757	1.82693	2.06925	2.36783	2.44404	2.52997	2.67421	2.6652	2.61393	2.77836	2.99701	3.10874	3.63071	4.45862	4.99222	5.18884	5.3923	5.61387	5.73318	5.81271	5.80659	5.65256	5.6212	5.8854	6.2861	6.59344	6.89317	7.17374	7.32855	7.42922	7.48871	7.59703	7.60337	7.56032	7.54503	7.57378	7.62027	7.56773	7.35456	7.10013	6.99123	6.89739	6.61636	6.23139	5.82763	5.40091	4.91054	4.42616	4.11686
1.72357	1.81653	1.9235	2.19019	2.47778	2.60234	2.67362	2.76575	2.7788	2.71799	2.91215	3.1128	3.2422	3.79543	4.67249	5.22501	5.41026	5.61899	5.85618	5.98904	6.06188	6.05071	5.8995	5.86969	6.16581	6.55718	6.86972	7.19143	7.46992	7.6541	7.75459	7.81402	7.92652	7.94296	7.89874	7.86871	7.90471	7.95976	7.91787	7.67473	7.41587	7.3228	7.20444	6.928	6.52035	6.12072	5.68652	5.18728	4.68339	4.35272
1.578	1.66272	1.77617	2.03323	2.30884	2.40274	2.4714	2.60763	2.63545	2.57361	2.73624	2.92567	3.09999	3.59919	4.4134	4.93817	5.12419	5.35012	5.57008	5.68909	5.76403	5.76124	5.62933	5.58839	5.86162	6.23497	6.53656	6.85883	7.11152	7.28157	7.37387	7.45096	7.54768	7.55236	7.50439	7.49641	7.54769	7.58376	7.53705	7.3124	7.07409	6.97453	6.8538	6.57733	6.18907	5.80291	5.37407	4.88003	4.40141	4.08182
1.58636	1.67594	1.80217	2.03194	2.31286	2.42202	2.50069	2.64508	2.64627	2.57491	2.75358	2.94204	3.08248	3.59004	4.41528	4.94863	5.1452	5.35012	5.56866	5.69711	5.78261	5.77864	5.62566	5.59933	5.87199	6.26392	6.56531	6.86074	7.14133	7.30473	7.39682	7.47018	7.57618	7.58939	7.55543	7.53392	7.56074	7.60878	7.56306	7.34732	7.10404	6.99123	6.89044	6.62008	6.22534	5.83528	5.41062	4.90998	4.43154	4.12104
1.60903	1.65792	1.79227	2.03708	2.32627	2.44129	2.48256	2.6104	2.63139	2.61523	2.73376	2.93269	3.0978	3.58801	4.43884	4.96433	5.14196	5.35539	5.57573	5.70112	5.76531	5.76311	5.61772	5.60358	5.87138	6.24174	6.55969	6.86646	7.14004	7.29613	7.39075	7.45988	7.56992	7.56913	7.51557	7.51447	7.54632	7.59187	7.53305	7.30384	7.06433	6.96425	6.85254	6.57733	6.18665	5.79408	5.36892	4.89113	4.39334	4.08809
1.55533	1.63388	1.74893	2.01264	2.29141	2.40137	2.45188	2.58127	2.6057	2.53979	2.70155	2.89643	3.03982	3.53616	4.34462	4.84924	5.05469	5.25749	5.48107	5.61628	5.67564	5.6867	5.54131	5.50637	5.77567	6.14687	6.4503	6.75263	7.0156	7.17503	7.26991	7.34046	7.45105	7.45523	7.41349	7.39499	7.43441	7.47149	7.41967	7.1958	6.9478	6.85372	6.72934	6.45837	6.08267	5.6952	5.27582	4.79574	4.3223	4.00494
1.60664	1.70838	1.79846	2.04738	2.35845	2.44817	2.51603	2.62843	2.63004	2.59702	2.73872	2.94555	3.08029	3.63173	4.44732	4.99571	5.16378	5.37648	5.61953	5.74254	5.81399	5.79479	5.65011	5.61695	5.8921	6.27871	6.58719	6.89699	7.16272	7.33583	7.42382	7.48322	7.6151	7.62014	7.57431	7.55059	7.59301	7.64124	7.60041	7.36511	7.11511	7.02658	6.92898	6.64672	6.25859	5.86353	5.45404	4.96655	4.48374	4.16445
1.54937	1.63629	1.76503	1.99977	2.2713	2.36695	2.44072	2.56186	2.57594	2.51377	2.69164	2.88006	3.02122	3.53209	4.33897	4.85796	5.0555	5.26201	5.474	5.60025	5.6782	5.68173	5.53031	5.50759	5.76836	6.13331	6.44405	6.73673	7.00393	7.17305	7.26451	7.32811	7.42811	7.45523	7.4051	7.38735	7.43372	7.47149	7.43168	7.19646	6.95821	6.86015	6.74892	6.4689	6.08388	5.7058	5.26782	4.79574	4.318	4.00546
1.57562	1.66032	1.79103	2.03708	2.32359	2.44129	2.4714	2.61734	2.61922	2.55539	2.73872	2.91748	3.05842	3.58191	4.42942	4.9312	5.12257	5.32979	5.55736	5.67841	5.74097	5.74634	5.61222	5.57017	5.84638	6.21587	6.51593	6.82958	7.09921	7.24914	7.34687	7.42282	7.5303	7.54467	7.47992	7.47696	7.51062	7.55535	7.49703	7.26826	7.02592	6.92441	6.81905	6.54573	6.14977	5.77583	5.35864	4.86451	4.3815	4.07816
1.51715	1.54977	1.68827	1.91872	2.18951	2.29813	2.33473	2.46476	2.4948	2.46564	2.6074	2.80287	2.94683	3.45685	4.24852	4.73503	4.92781	5.12042	5.32918	5.46664	5.53152	5.53886	5.39584	5.37332	5.63303	5.99346	6.30654	6.59428	6.84385	7.00432	7.089	7.16134	7.25503	7.26378	7.21911	7.21648	7.24492	7.29364	7.24093	7.01727	6.80067	6.6918	6.57961	6.31401	5.92368	5.54866	5.13415	4.65709	4.17271	3.88204
1.51357	1.60024	1.71055	1.97404	2.21096	2.34631	2.39888	2.53411	2.53537	2.47735	2.65696	2.85199	2.97418	3.48329	4.2815	4.77862	4.98842	5.18142	5.37793	5.52476	5.58596	5.59601	5.45452	5.40127	5.68301	6.04829	6.35467	6.63243	6.90089	7.06784	7.14908	7.22448	7.31203	7.32457	7.28344	7.2651	7.30328	7.33421	7.30096	7.07195	6.85275	6.73421	6.63268	6.37473	5.97749	5.60692	5.19127	4.71865	4.2502	3.94689
1.51835	1.58582	1.70932	1.95603	2.2351	2.32979	2.36541	2.52857	2.54213	2.48385	2.652	2.83328	2.97746	3.49752	4.29375	4.7917	4.97549	5.17615	5.39206	5.53745	5.59621	5.5985	5.46491	5.4359	5.70313	6.06985	6.3728	6.67123	6.93199	7.09166	7.17001	7.24644	7.35235	7.3644	7.3184	7.30539	7.34996	7.39305	7.34497	7.11872	6.89897	6.78304	6.68069	6.42181	6.02827	5.65518	5.24383	4.75747	4.2884	3.98193
1.4921	1.56299	1.6536	1.91357	2.17342	2.28849	2.34589	2.46199	2.47587	2.46044	2.61731	2.79117	2.95558	3.45583	4.25041	4.77688	4.94317	5.14904	5.37793	5.51206	5.57123	5.57054	5.44352	5.42314	5.69399	6.05383	6.35654	6.65151	6.91838	7.09166	7.16731	7.24232	7.36347	7.37208	7.32819	7.31025	7.3479	7.40184	7.36965	7.13058	6.89832	6.78947	6.68954	6.4212	6.03794	5.66107	5.24783	4.7791	4.28894	3.97565
1.53982	1.59663	1.7217	1.95732	2.23241	2.34906	2.39609	2.54798	2.53132	2.48645	2.65819	2.85199	2.9884	3.51074	4.31259	4.82832	5.02398	5.21682	5.43232	5.56751	5.63977	5.63763	5.49119	5.45777	5.733	6.11668	6.41405	6.72147	6.9806	7.14129	7.24696	7.3034	7.40865	7.4182	7.38832	7.36165	7.40283	7.44039	7.39633	7.18328	6.94194	6.82738	6.73123	6.45217	6.06998	5.67578	5.25811	4.76634	4.30239	3.98925
1.43005	1.50891	1.64865	1.88398	2.11979	2.27197	2.30126	2.43702	2.438	2.4019	2.57272	2.77246	2.89432	3.39483	4.16279	4.66616	4.85589	5.05414	5.26631	5.40318	5.45978	5.47426	5.34511	5.31499	5.57512	5.94417	6.24528	6.53132	6.80432	6.96594	7.04715	7.12222	7.21749	7.22395	7.19814	7.17897	7.21265	7.26253	7.21225	6.99487	6.76877	6.66738	6.56129	6.29109	5.90676	5.52982	5.1113	4.63268	4.16679	3.86687
1.58397	1.69396	1.79103	2.03323	2.32895	2.43165	2.53555	2.65063	2.64627	2.60743	2.74739	2.9666	3.07811	3.61648	4.4313	4.96694	5.15651	5.3697	5.59268	5.72584	5.80246	5.801	5.65134	5.62059	5.89881	6.27501	6.57469	6.88681	7.15948	7.33384	7.41775	7.49763	7.59564	7.60826	7.5827	7.54711	7.58477	7.62906	7.58307	7.35852	7.09883	7.01115	6.89866	6.61698	6.23562	5.83763	5.41291	4.9183	4.44177	4.11738
1.55414	1.67234	1.76008	2.05381	2.28336	2.38898	2.48535	2.60624	2.63274	2.55019	2.74739	2.93503	3.07811	3.61953	4.42188	4.97915	5.16863	5.37949	5.59198	5.7265	5.79926	5.81218	5.67151	5.62788	5.91466	6.29473	6.61157	6.91988	7.18281	7.36494	7.4515	7.53057	7.63318	7.6418	7.60507	7.58879	7.64656	7.67032	7.63242	7.40859	7.15742	7.05742	6.93151	6.66654	6.27128	5.87353	5.44033	4.93716	4.45791	4.13254
1.50164	1.55818	1.66227	1.94316	2.18683	2.28849	2.37517	2.47586	2.51509	2.45393	2.62475	2.8134	2.96105	3.45583	4.24852	4.75857	4.94236	5.1528	5.36309	5.48735	5.57059	5.55439	5.41907	5.4043	5.67387	6.0372	6.34029	6.64134	6.90413	7.07049	7.13896	7.22036	7.32732	7.32177	7.29603	7.28525	7.32593	7.37006	7.32963	7.10159	6.85666	6.76119	6.64342	6.37845	6.00227	5.61811	5.21355	4.74471	4.26419	3.95264
1.49448	1.59183	1.71674	1.96632	2.20024	2.33254	2.38633	2.51192	2.54078	2.46564	2.65696	2.83562	2.97418	3.47515	4.27302	4.78822	4.97469	5.17916	5.38217	5.52075	5.58916	5.58607	5.45574	5.42132	5.69764	6.06061	6.3603	6.64706	6.90931	7.07975	7.16123	7.25124	7.33636	7.34413	7.3219	7.29567	7.33074	7.36735	7.3343	7.09698	6.87033	6.77083	6.64721	6.3927	5.99623	5.61752	5.19242	4.69646	4.22114	3.92388
1.46227	1.56419	1.67589	1.93287	2.17476	2.28023	2.36262	2.49112	2.52185	2.44353	2.60369	2.79819	2.94355	3.44058	4.21649	4.72719	4.91084	5.11515	5.32494	5.45127	5.5155	5.53079	5.4044	5.35874	5.62327	5.99099	6.28779	6.57075	6.81663	6.98182	7.0701	7.14143	7.23557	7.23582	7.21632	7.19773	7.22844	7.25779	7.21025	6.99816	6.77268	6.66866	6.52717	6.28241	5.88983	5.50687	5.08731	4.60163	4.14419	3.83288
1.54698	1.63989	1.74027	2.02036	2.28873	2.37246	2.43654	2.56324	2.56648	2.53458	2.68916	2.86369	3.00809	3.53006	4.35028	4.84837	5.05469	5.25146	5.48672	5.60626	5.67756	5.6867	5.54376	5.52581	5.7903	6.15549	6.46155	6.76535	7.02727	7.18827	7.28611	7.3487	7.46079	7.45174	7.41069	7.41236	7.44471	7.48705	7.44435	7.21359	6.9849	6.88971	6.77293	6.48935	6.11774	5.72463	5.31466	4.8279	4.34544	4.04521
1.44198	1.53054	1.67217	1.90199	2.16806	2.26647	2.3166	2.48002	2.45829	2.44613	2.60864	2.80287	2.94792	3.43957	4.23345	4.72719	4.95125	5.14301	5.35038	5.4987	5.56803	5.57117	5.43374	5.41403	5.68667	6.05938	6.35654	6.65088	6.92357	7.08372	7.18351	7.26291	7.34609	7.36649	7.32749	7.31998	7.36164	7.40928	7.36965	7.13783	6.91915	6.81453	6.69901	6.43235	6.04942	5.67519	5.24668	4.773	4.29647	3.995
1.41573	1.48969	1.62884	1.84796	2.12649	2.2059	2.27337	2.41483	2.43259	2.38499	2.54051	2.74322	2.86369	3.3806	4.15431	4.6339	4.83003	5.02703	5.25006	5.38581	5.45529	5.45004	5.33472	5.30588	5.56293	5.92014	6.21653	6.51605	6.76414	6.91433	7.00665	7.08996	7.19594	7.20368	7.15479	7.13938	7.17901	7.23413	7.17624	6.9481	6.72646	6.62882	6.51137	6.2409	5.8584	5.48451	5.0776	4.58388	4.12481	3.82085
1.46465	1.54977	1.64741	1.90071	2.18415	2.294	2.34867	2.48141	2.49074	2.44483	2.61731	2.77129	2.92276	3.44567	4.22685	4.74201	4.92943	5.13096	5.34402	5.47666	5.5424	5.53886	5.41601	5.38243	5.65253	6.0064	6.31779	6.607	6.87561	7.02549	7.11735	7.19908	7.29118	7.3085	7.26946	7.24218	7.29367	7.32813	7.28695	7.04691	6.81955	6.71878	6.60993	6.34561	5.94786	5.56926	5.14558	4.65431	4.18024	3.86583
1.29164	1.39476	1.50256	1.70901	1.97633	2.08201	2.12554	2.28029	2.30817	2.25881	2.43645	2.61925	2.75976	3.25452	3.9819	4.46215	4.64982	4.86435	5.05791	5.18673	5.26121	5.26431	5.15379	5.12665	5.37883	5.7464	6.03401	6.31191	6.57618	6.74162	6.82371	6.89779	7.00409	7.01432	6.98768	6.97268	7.01904	7.05289	7.00617	6.80316	6.57282	6.47718	6.36543	6.10646	5.73265	5.34914	4.94622	4.46076	4.00804	3.70161
1.35727	1.43441	1.54837	1.77076	2.03398	2.14671	2.23153	2.36212	2.37579	2.33296	2.51201	2.71983	2.85056	3.32773	4.11191	4.5999	4.78801	4.9954	5.19355	5.33971	5.41302	5.42954	5.30171	5.28279	5.54769	5.92322	6.21653	6.48807	6.76673	6.92227	7.0215	7.08241	7.1876	7.19949	7.17856	7.1623	7.19961	7.24697	7.20625	7.00343	6.77203	6.66995	6.56129	6.29047	5.92187	5.52865	5.11473	4.62548	4.15764	3.86008
1.37039	1.43922	1.56075	1.80421	2.03666	2.18387	2.25384	2.3538	2.38661	2.35897	2.51325	2.6941	2.83306	3.32976	4.12981	4.61908	4.79609	5.02477	5.22816	5.36577	5.44248	5.44072	5.3176	5.30467	5.56841	5.92507	6.21966	6.51987	6.79136	6.95535	7.0377	7.11192	7.21888	7.24281	7.20233	7.19287	7.22913	7.27335	7.2416	7.01661	6.7844	6.68537	6.57076	6.31463	5.91945	5.52512	5.10731	4.62437	4.13558	3.82765
1.19738	1.29142	1.41095	1.60094	1.87309	1.98565	2.02512	2.17071	2.18646	2.14044	2.29151	2.46838	2.58911	3.07557	3.76615	4.23721	4.41709	4.6	4.80784	4.93756	5.01461	5.02267	4.9038	4.88789	5.13804	5.47532	5.74461	6.034	6.27157	6.4293	6.51117	6.58003	6.67808	6.69708	6.67583	6.64343	6.68331	6.73437	6.68138	6.47838	6.25383	6.17196	6.05965	5.79915	5.42556	5.0537	4.65604	4.17792	3.71853	3.43176
1.29164	1.35511	1.46418	1.71673	1.94549	2.04347	2.12135	2.24422	2.25138	2.238	2.39433	2.57481	2.72038	3.2047	3.94704	4.43076	4.60699	4.80636	5.02542	5.16068	5.23175	5.24505	5.12934	5.11997	5.37883	5.73285	6.02839	6.32654	6.57618	6.73435	6.82439	6.89917	7.0173	7.01502	6.97369	6.9692	7.0163	7.05492	7.01751	6.80382	6.58975	6.48746	6.3806	6.10584	5.74051	5.35679	4.92623	4.45799	3.98652	3.6786
1.18425	1.277	1.3738	1.57778	1.83823	1.9361	2.00002	2.12633	2.15671	2.13654	2.32495	2.49528	2.61645	3.09083	3.82173	4.2965	4.47285	4.66176	4.86435	5.00703	5.08122	5.09908	4.98326	4.97112	5.23558	5.58622	5.87337	6.15611	6.41092	6.57289	6.67858	6.73514	6.83309	6.87387	6.84084	6.83376	6.86937	6.92778	6.89213	6.68919	6.47061	6.36151	6.25298	5.99493	5.62384	5.24203	4.83597	4.36426	3.90257	3.59597
1.15562	1.2746	1.3478	1.57778	1.80873	1.91683	2.00142	2.11246	2.15806	2.13524	2.32495	2.47189	2.61755	3.10303	3.81231	4.30871	4.47042	4.67984	4.89261	5.03108	5.11517	5.13262	5.02054	5.00575	5.288	5.63119	5.929	6.22606	6.47897	6.64833	6.73866	6.81338	6.91442	6.93816	6.92195	6.90322	6.95245	6.99811	6.96682	6.75375	6.53116	6.44312	6.34585	6.10274	5.71573	5.35444	4.94965	4.46963	4.01235	3.70266
1.10312	1.18688	1.30819	1.52245	1.73499	1.83148	1.91077	2.04033	2.07422	2.04678	2.22089	2.39003	2.50706	2.96882	3.65497	4.09772	4.29991	4.4908	4.68562	4.82199	4.89931	4.93509	4.82006	4.80769	5.07221	5.41618	5.69648	5.98313	6.20936	6.36181	6.46931	6.5416	6.62942	6.65446	6.62899	6.63232	6.68331	6.71949	6.68538	6.49419	6.2688	6.18031	6.07229	5.81402	5.45457	5.08136	4.6766	4.19622	3.74759	3.45006
1.0888	1.17006	1.28343	1.49801	1.72158	1.83286	1.89403	2.03478	2.05663	2.03638	2.18497	2.39003	2.50487	2.94543	3.65592	4.10818	4.30395	4.50285	4.69905	4.83267	4.91212	4.94068	4.82617	4.82349	5.07343	5.4285	5.71148	5.98822	6.23269	6.39159	6.49227	6.57454	6.67182	6.69918	6.68213	6.68233	6.7046	6.76547	6.72406	6.52186	6.32609	6.22529	6.11967	5.86359	5.4987	5.13138	4.71488	4.24946	3.79763	3.50968
1.05181	1.14122	1.23886	1.44269	1.66661	1.76265	1.79083	1.96404	1.97955	1.96353	2.12798	2.30582	2.44361	2.88849	3.5683	4.02013	4.19405	4.37783	4.59026	4.72445	4.78786	4.82949	4.72715	4.72142	4.96797	5.30713	5.5896	5.8782	6.11927	6.26851	6.36806	6.44002	6.53697	6.56642	6.5332	6.53021	6.57278	6.62954	6.59401	6.39274	6.19915	6.11348	6.01164	5.75392	5.3917	5.02839	4.62291	4.14963	3.69378	3.40927
0.975446	1.03908	1.14353	1.32561	1.53656	1.62775	1.69321	1.8295	1.86054	1.84386	1.98924	2.14091	2.28717	2.71565	3.36856	3.7795	3.95808	4.15189	4.35501	4.47862	4.56559	4.59407	4.50466	4.50817	4.74059	5.07671	5.3602	5.62318	5.86586	6.02038	6.11087	6.19295	6.28811	6.32185	6.28358	6.28641	6.33385	6.38406	6.34124	6.16019	5.97455	5.8873	5.78799	5.5346	5.17891	4.81769	4.41099	3.9472	3.50974	3.23198
0.967094	1.04749	1.17819	1.37321	1.56739	1.67731	1.72528	1.90163	1.91464	1.85947	2.05489	2.21109	2.36812	2.76445	3.4298	3.87279	4.06233	4.24528	4.44402	4.57481	4.66231	4.69967	4.6104	4.59626	4.84239	5.18452	5.47709	5.74528	5.98381	6.14676	6.24183	6.32061	6.41393	6.45881	6.42412	6.42394	6.47735	6.5112	6.48797	6.30512	6.10931	6.01581	5.90866	5.66718	5.30405	4.94953	4.52523	4.06145	3.61037	3.33292
0.933685	0.999429	1.10515	1.29602	1.49097	1.59472	1.63742	1.77957	1.78887	1.80093	1.9434	2.10232	2.24998	2.66176	3.31015	3.72981	3.9104	4.10444	4.30556	4.43519	4.50474	4.53754	4.44415	4.44802	4.70524	5.01325	5.28894	5.56086	5.79586	5.93766	6.03796	6.12707	6.22069	6.25477	6.22345	6.23362	6.29335	6.33266	6.30123	6.11803	5.92312	5.84232	5.73428	5.48813	5.13901	4.78238	4.383	3.93389	3.48068	3.20165
0.925332	1.01144	1.10886	1.29344	1.48963	1.5782	1.6416	1.74767	1.82944	1.80223	1.94092	2.09881	2.2456	2.66278	3.30261	3.72196	3.90151	4.09465	4.27519	4.40981	4.48937	4.52325	4.44109	4.4383	4.68207	5.01079	5.28707	5.56467	5.79651	5.94958	6.03864	6.11608	6.2193	6.24918	6.22904	6.22042	6.27824	6.31846	6.29456	6.10749	5.91726	5.83332	5.73492	5.48069	5.11544	4.76472	4.35786	3.89674	3.45862	3.17916
0.905048	0.945356	1.07667	1.27029	1.45209	1.56443	1.63463	1.76154	1.77805	1.80744	1.95455	2.12103	2.27076	2.66786	3.3224	3.74288	3.92818	4.11122	4.29426	4.42651	4.52396	4.54872	4.46432	4.46868	4.71865	5.05022	5.34457	5.60156	5.84188	5.99986	6.10209	6.18128	6.28047	6.30299	6.30316	6.31072	6.34484	6.39488	6.37525	6.17666	5.99734	5.90786	5.80757	5.55566	5.20491	4.84653	4.42241	3.96828	3.51243	3.23669
0.899082	0.951364	1.07419	1.24841	1.43332	1.55893	1.61511	1.74212	1.78887	1.80093	1.92606	2.08829	2.24122	2.63533	3.27906	3.69842	3.87969	4.07055	4.25965	4.39311	4.48937	4.52263	4.43009	4.44134	4.68085	5.0077	5.29457	5.56976	5.80883	5.96479	6.06362	6.13805	6.24293	6.26945	6.25841	6.26974	6.30433	6.37324	6.33791	6.14306	5.96609	5.8738	5.7804	5.54079	5.17891	4.81122	4.4087	3.9472	3.49252	3.21786
0.850162	0.880468	0.996197	1.20081	1.38907	1.48459	1.51609	1.67831	1.72801	1.72158	1.87527	2.02045	2.19637	2.57737	3.2263	3.62606	3.79484	3.99524	4.19112	4.32898	4.41571	4.45803	4.37263	4.38909	4.62843	4.95287	5.24144	5.51189	5.75698	5.91318	6.01164	6.09687	6.21582	6.2408	6.21226	6.23292	6.27344	6.33334	6.30656	6.11737	5.9394	5.86609	5.74818	5.49556	5.14325	4.7712	4.36757	3.90284	3.42956	3.16661
0.814366	0.891283	0.996197	1.14549	1.32472	1.4488	1.48959	1.61728	1.66986	1.67866	1.82695	1.97718	2.12745	2.52145	3.1302	3.53975	3.70191	3.89583	4.07809	4.20739	4.29849	4.32945	4.25833	4.25968	4.49066	4.82472	5.0908	5.34908	5.58329	5.73651	5.81858	5.91362	6.02397	6.04934	6.04096	6.05024	6.08326	6.14331	6.11915	5.94213	5.75061	5.67139	5.56623	5.33138	4.9764	4.6223	4.22934	3.76973	3.34292	3.07352
0.790503	0.843218	0.964007	1.11204	1.34349	1.41577	1.44496	1.62561	1.65363	1.63183	1.77988	1.94092	2.07057	2.46451	3.07838	3.45866	3.65504	3.8288	4.03076	4.16731	4.23444	4.27851	4.20699	4.22566	4.45043	4.77544	5.04705	5.30902	5.54764	5.69416	5.79562	5.87793	5.98296	6.0158	5.99061	6.00857	6.05992	6.1264	6.09181	5.91315	5.73693	5.65212	5.54665	5.29111	4.94617	4.57933	4.18478	3.72426	3.27404	3.016
0.773798	0.855234	0.940484	1.09145	1.31131	1.38824	1.45891	1.56458	1.60359	1.60191	1.76749	1.92104	2.04322	2.4452	3.03787	3.4421	3.61948	3.79491	3.99756	4.13725	4.21906	4.2605	4.17826	4.19467	4.42605	4.75141	5.01892	5.2874	5.51847	5.67497	5.77537	5.84431	5.96349	6.00043	5.99131	5.99468	6.04207	6.1095	6.08647	5.90458	5.71936	5.62384	5.52896	5.28987	4.95464	4.58522	4.19049	3.73535	3.30471	3.03012
0.763945	0.832563	0.921513	1.10088	1.2657	1.36449	1.4435	1.54863	1.59158	1.58273	1.72428	1.87626	1.99852	2.36897	2.93309	3.31825	3.47567	3.66016	3.84645	3.96751	4.05996	4.09936	4.0353	4.04484	4.28166	4.58471	4.85124	5.10992	5.33352	5.48261	5.57604	5.66259	5.76362	5.79523	5.79037	5.8011	5.85687	5.90047	5.88637	5.7149	5.53562	5.46028	5.35731	5.12103	4.78871	4.44078	4.04854	3.6019	3.17659	2.91741
0.731729	0.810934	0.901085	1.05457	1.22883	1.31631	1.38981	1.50147	1.54289	1.54176	1.67596	1.82598	1.9482	2.31	2.85725	3.2302	3.39041	3.56639	3.74331	3.87298	3.95875	3.99997	3.93934	3.94945	4.18077	4.48491	4.74092	4.99195	5.21005	5.35888	5.44947	5.53528	5.63642	5.66422	5.66311	5.67017	5.71956	5.76421	5.74431	5.58578	5.4064	5.32952	5.22905	5.00083	4.66478	4.32513	3.94144	3.49624	3.08673	2.82485
0.72815	0.780893	0.886848	1.0372	1.2047	1.30805	1.36122	1.47026	1.52193	1.52875	1.66729	1.80141	1.9296	2.29221	2.84689	3.20884	3.37061	3.55397	3.72883	3.87131	3.94786	3.99562	3.93995	3.95735	4.1893	4.48583	4.75311	5.00498	5.23565	5.37641	5.47411	5.56514	5.66874	5.70649	5.69773	5.70698	5.75801	5.81357	5.79733	5.62827	5.45815	5.38092	5.28276	5.05195	4.70951	4.36103	3.97028	3.52592	3.10072	2.83897
0.676843	0.745445	0.82804	0.954857	1.13498	1.22064	1.30404	1.38912	1.43606	1.44615	1.56695	1.72189	1.8202	2.16511	2.68719	3.04886	3.20899	3.37434	3.55434	3.68326	3.77364	3.81424	3.75566	3.77782	3.99393	4.297	4.53778	4.77954	4.99942	5.14382	5.24425	5.32012	5.41815	5.4511	5.45825	5.46873	5.51325	5.5735	5.55257	5.40231	5.23518	5.15699	5.06637	4.83758	4.51002	4.16946	3.79263	3.35676	2.9565	2.70116
0.647013	0.702788	0.789041	0.925266	1.08738	1.16765	1.2357	1.3267	1.38467	1.39282	1.51058	1.66224	1.77699	2.11123	2.61323	2.95034	3.10717	3.27794	3.45509	3.57538	3.66058	3.70491	3.65573	3.68031	3.89182	4.17994	4.4262	4.66666	4.87693	5.01347	5.11465	5.19453	5.29789	5.32846	5.3275	5.34405	5.39138	5.44569	5.42385	5.27417	5.1128	5.04229	4.94823	4.71707	4.39788	4.0647	3.69438	3.26747	2.86717	2.62272
0.59332	0.647513	0.728377	0.862223	1.02034	1.0823	1.14784	1.25735	1.29609	1.31152	1.42634	1.56049	1.67361	2.00447	2.48228	2.81564	2.96534	3.13146	3.30497	3.42073	3.5075	3.55645	3.51453	3.53814	3.74918	4.02746	4.2665	4.50513	4.71069	4.84606	4.93914	5.02227	5.12863	5.16321	5.16004	5.177	5.23347	5.28169	5.25979	5.11672	4.96209	4.89192	4.79881	4.5724	4.26731	3.93993	3.57214	3.15184	2.76062	2.51185
0.587354	0.640904	0.714758	0.831346	0.982801	1.05271	1.11158	1.21227	1.26971	1.28615	1.40095	1.53476	1.63806	1.96888	2.44129	2.75112	2.90069	3.06292	3.23468	3.35459	3.43576	3.4875	3.44913	3.47617	3.687	3.96123	4.19774	4.42945	4.63907	4.77162	4.86826	4.94917	5.05286	5.0853	5.08697	5.10442	5.15589	5.20629	5.19676	5.05052	4.9061	4.83184	4.74069	4.52501	4.21622	3.88873	3.52473	3.11246	2.71757	2.4789
0.533064	0.592239	0.66276	0.781169	0.927159	1.00797	1.06765	1.15193	1.19939	1.21786	1.32724	1.45348	1.55437	1.86009	2.32117	2.63081	2.76735	2.92736	3.09551	3.21898	3.30092	3.34557	3.31343	3.34221	3.54832	3.8146	4.04679	4.2711	4.46959	4.6052	4.6914	4.77588	4.8763	4.91131	4.91602	4.93042	4.97876	5.03418	5.02202	4.88088	4.72968	4.66606	4.57579	4.36671	4.05603	3.74277	3.38564	2.97687	2.59703	2.35888
0.522922	0.570009	0.644189	0.767017	0.897663	0.981814	1.02302	1.13529	1.17573	1.19445	1.3037	1.42775	1.5303	1.83569	2.28537	2.58242	2.7326	2.8818	3.04571	3.16721	3.24488	3.29805	3.26576	3.29634	3.49194	3.76377	3.99397	4.2164	4.41969	4.54764	4.64009	4.72475	4.82173	4.86065	4.85903	4.88179	4.92899	4.98143	4.96667	4.82126	4.69225	4.6198	4.53157	4.31714	4.01976	3.70245	3.34879	2.9361	2.55936	2.32907
0.485933	0.544174	0.602714	0.72263	0.84068	0.91987	0.986762	1.05623	1.1054	1.1177	1.23185	1.35816	1.45263	1.73198	2.17325	2.4717	2.59846	2.74924	2.90796	3.02725	3.11677	3.16139	3.13373	3.16207	3.36148	3.61929	3.84271	4.06282	4.25312	4.39181	4.47876	4.55249	4.65143	4.694	4.69891	4.71127	4.76078	4.8127	4.80761	4.67534	4.5334	4.4704	4.37678	4.18053	3.88132	3.5668	3.2177	2.82186	2.45228	2.22735
0.453717	0.490702	0.551335	0.665377	0.786379	0.849667	0.90936	0.997972	1.0486	1.06307	1.17239	1.28682	1.38754	1.65065	2.05831	2.33744	2.46512	2.61368	2.76702	2.88363	2.97073	3.02349	2.99529	3.02962	3.22128	3.47297	3.68895	3.90256	4.08786	4.21613	4.3019	4.38571	4.47904	4.52105	4.52586	4.54943	4.59772	4.65141	4.63921	4.51394	4.37749	4.31843	4.228	4.01975	3.73623	3.43526	3.08746	2.70262	2.33443	2.11726
0.43045	0.475081	0.544525	0.637073	0.754201	0.829707	0.889836	0.955668	1.00938	1.02014	1.13213	1.25817	1.32682	1.60388	1.9933	2.27031	2.40047	2.54477	2.69956	2.81081	2.89707	2.94709	2.92744	2.9631	3.14874	3.39811	3.61019	3.82339	4.00619	4.12779	4.21819	4.29443	4.40153	4.43336	4.4444	4.46573	4.51465	4.56823	4.56051	4.4395	4.30523	4.24743	4.15819	3.96027	3.67367	3.3611	3.02691	2.6369	2.28331	2.06287
0.400024	0.443238	0.513574	0.602335	0.713978	0.771893	0.826381	0.925153	0.951232	0.97201	1.06028	1.15993	1.259	1.51745	1.88449	2.14258	2.27319	2.41335	2.56039	2.67119	2.74718	2.80826	2.78869	2.82184	3	3.23577	3.44674	3.65168	3.83023	3.94649	4.03897	4.11496	4.21385	4.25448	4.25492	4.28444	4.33271	4.38564	4.37777	4.26294	4.13206	4.07618	3.99203	3.79268	3.51075	3.21838	2.88353	2.50712	2.16196	1.95409
0.37795	0.418004	0.483242	0.573387	0.681799	0.735414	0.808948	0.882848	0.916071	0.936889	1.03116	1.14765	1.24314	1.49305	1.84633	2.1064	2.23077	2.36891	2.5173	2.61508	2.70331	2.75794	2.73796	2.77658	2.9555	3.19634	3.39892	3.60621	3.77741	3.90513	3.98935	4.06692	4.16901	4.20207	4.21262	4.2379	4.29186	4.34236	4.33275	4.21913	4.09072	4.03891	3.94654	3.75643	3.48687	3.18925	2.8584	2.47773	2.13909	1.92768
0.382126	0.418004	0.47829	0.565024	0.669062	0.728532	0.781056	0.861349	0.897137	0.927783	1.00143	1.1225	1.20758	1.44425	1.81194	2.05932	2.18349	2.32297	2.46361	2.56932	2.66199	2.71011	2.69517	2.73405	2.90612	3.13874	3.35016	3.54834	3.72427	3.8469	3.93332	4.01682	4.11375	4.14617	4.16158	4.18441	4.23453	4.28758	4.27973	4.16281	4.04743	3.98911	3.90295	3.70966	3.44123	3.14511	2.81899	2.44501	2.10277	1.9018
0.342751	0.380754	0.424434	0.507772	0.600683	0.654199	0.721785	0.791304	0.825462	0.842581	0.934536	1.02718	1.12718	1.34918	1.68475	1.92419	2.04328	2.16858	2.3082	2.41333	2.49481	2.5542	2.54083	2.57578	2.74946	2.9687	3.16702	3.36042	3.52951	3.64343	3.72845	3.80612	3.89722	3.94423	3.95916	3.97638	4.03543	4.08707	4.08098	3.97769	3.85864	3.80212	3.72415	3.53804	3.27408	2.99709	2.67047	2.31357	1.98761	1.78491
0.330223	0.364532	0.418863	0.490403	0.593309	0.64181	0.691801	0.781595	0.813967	0.838028	0.917193	1.01081	1.10694	1.32478	1.65602	1.88713	2.00732	2.13281	2.27288	2.37392	2.44997	2.51475	2.50141	2.53811	2.71014	2.93235	3.12733	3.31526	3.48382	3.59877	3.6947	3.76906	3.87046	3.9065	3.9193	3.95381	4.00213	4.05427	4.0473	3.94804	3.83293	3.77835	3.69888	3.5083	3.24808	2.96943	2.6499	2.29194	1.96689	1.76713
0.327836	0.367536	0.415768	0.482684	0.57856	0.631486	0.679249	0.742758	0.778129	0.800305	0.884984	0.991514	1.05662	1.28208	1.59996	1.81782	1.94106	2.06201	2.19799	2.29743	2.3808	2.43121	2.4192	2.46035	2.63181	2.84794	3.03888	3.22464	3.38984	3.50315	3.58804	3.66749	3.76654	3.80134	3.82281	3.85031	3.89708	3.95384	3.94893	3.85087	3.73658	3.68228	3.60727	3.42868	3.17161	2.89704	2.57879	2.22816	1.912	1.71379
0.295024	0.338697	0.391626	0.463385	0.537667	0.599137	0.642292	0.712243	0.751082	0.766484	0.867021	0.944148	1.02708	1.23683	1.54108	1.75767	1.87843	1.99649	2.12417	2.22829	2.3065	2.36754	2.36113	2.39655	2.56689	2.78264	2.962	3.14769	3.30397	3.4168	3.50332	3.57278	3.66401	3.71329	3.72667	3.75862	3.81401	3.85781	3.86423	3.7649	3.65618	3.60389	3.52325	3.34442	3.09151	2.82259	2.51081	2.16355	1.85066	1.65992
0.296217	0.333891	0.380483	0.44473	0.529622	0.57436	0.617886	0.67618	0.709158	0.745021	0.814372	0.909062	0.987696	1.18498	1.49397	1.70013	1.80974	1.92908	2.0666	2.16115	2.2354	2.29548	2.289	2.33094	2.48917	2.69546	2.88074	3.06406	3.2262	3.32813	3.41894	3.48905	3.58755	3.62665	3.63787	3.67145	3.71892	3.77294	3.77353	3.67267	3.57025	3.51875	3.44933	3.26605	3.02169	2.75344	2.44998	2.10781	1.7963	1.61259
0.263404	0.297842	0.340865	0.402916	0.479343	0.530311	0.576745	0.645665	0.667911	0.692989	0.773491	0.849416	0.923699	1.10567	1.37903	1.57807	1.68569	1.80256	1.92143	2.0095	2.08647	2.14702	2.14536	2.17936	2.33403	2.5402	2.71792	2.88886	3.03598	3.14716	3.23398	3.30408	3.39048	3.43239	3.45363	3.48773	3.53595	3.57919	3.58145	3.49908	3.39448	3.35007	3.27748	3.10682	2.87207	2.61483	2.31859	1.98941	1.69352	1.51244
0.269967	0.301447	0.334675	0.389407	0.467947	0.522051	0.568377	0.608215	0.643568	0.67803	0.756767	0.833042	0.892521	1.08839	1.35594	1.55976	1.64812	1.76942	1.88893	1.98679	2.06598	2.11907	2.11755	2.159	2.31726	2.51648	2.6851	2.8577	3.01524	3.12069	3.20597	3.2708	3.36372	3.41527	3.42986	3.46064	3.50128	3.55451	3.56878	3.47932	3.3795	3.32983	3.25348	3.09381	2.85545	2.59335	2.30574	1.97721	1.68007	1.49911
0.258632	0.283423	0.327247	0.38812	0.449847	0.515857	0.540485	0.609602	0.645597	0.664372	0.734468	0.811991	0.883769	1.0589	1.33569	1.51791	1.62589	1.74268	1.8582	1.95539	2.0253	2.08459	2.08607	2.12619	2.27642	2.46904	2.64478	2.81636	2.96404	3.0704	3.15331	3.22585	3.31158	3.35308	3.36833	3.40507	3.45322	3.50446	3.50375	3.41838	3.32124	3.27554	3.20293	3.0427	2.80708	2.55598	2.27432	1.94532	1.64832	1.4808
0.247296	0.277415	0.307438	0.364962	0.430405	0.477314	0.527933	0.570765	0.615845	0.633803	0.71155	0.787431	0.847669	1.02332	1.27916	1.47214	1.56246	1.6685	1.78332	1.8779	1.95837	2.01098	2.01028	2.05207	2.20815	2.39141	2.56071	2.72637	2.87428	2.98306	3.06117	3.12736	3.22365	3.26644	3.29142	3.32276	3.37049	3.42264	3.43272	3.34921	3.25288	3.21064	3.13691	2.98322	2.74845	2.49095	2.20978	1.88764	1.60473	1.4353
0.249683	0.271407	0.299391	0.356599	0.42169	0.473873	0.514685	0.551347	0.587445	0.608438	0.68058	0.747667	0.819773	0.996882	1.25843	1.4316	1.52488	1.63612	1.74729	1.8445	1.92218	1.9703	1.97788	2.01471	2.16852	2.35476	2.52196	2.68058	2.83377	2.93542	3.01189	3.08893	3.17916	3.22277	3.25017	3.27275	3.32106	3.37462	3.38504	3.29815	3.20536	3.16052	3.09427	2.94171	2.70885	2.45887	2.17979	1.86379	1.58321	1.41072
0.227012	0.259991	0.282677	0.342447	0.40292	0.438083	0.492371	0.525687	0.559045	0.589576	0.652088	0.715504	0.777655	0.936895	1.17647	1.35401	1.43599	1.54273	1.65863	1.7473	1.82513	1.87619	1.88131	1.92327	2.06794	2.2491	2.41008	2.57056	2.70998	2.81466	2.8914	2.9647	3.05473	3.09944	3.1292	3.15432	3.20812	3.25222	3.26432	3.18978	3.09664	3.05803	2.98497	2.84103	2.61847	2.37677	2.1061	1.79169	1.51836	1.3532
0.215677	0.243769	0.270296	0.321861	0.384819	0.410552	0.458203	0.513897	0.550931	0.559658	0.627311	0.698546	0.754682	0.92266	1.14302	1.30867	1.39962	1.50507	1.61625	1.70221	1.77325	1.82588	1.83638	1.87345	2.01277	2.19426	2.35069	2.50983	2.64582	2.74915	2.82288	2.90191	2.99391	3.03585	3.06278	3.0925	3.14564	3.19676	3.2003	3.12786	3.04228	3.00533	2.93569	2.78805	2.5686	2.3344	2.07011	1.75786	1.49173	1.32731
0.209711	0.227548	0.269677	0.320575	0.369401	0.418123	0.451927	0.490317	0.527941	0.545349	0.590147	0.683927	0.742648	0.888599	1.10675	1.28164	1.3677	1.47118	1.56786	1.65478	1.73418	1.78271	1.79604	1.83639	1.97102	2.1536	2.31007	2.45959	2.59786	2.70085	2.78069	2.85352	2.93344	2.97855	3.01034	3.0404	3.09003	3.1386	3.14128	3.0745	2.99053	2.95329	2.88388	2.74283	2.52659	2.29555	2.02841	1.72292	1.45917	1.30012
0.213291	0.232955	0.272772	0.321218	0.388171	0.407799	0.444954	0.48685	0.518474	0.529089	0.585192	0.658782	0.721316	0.877924	1.09262	1.24633	1.34669	1.43541	1.54137	1.62539	1.69927	1.75258	1.7612	1.79964	1.93353	2.11109	2.26694	2.42652	2.56416	2.65717	2.74221	2.81063	2.90146	2.94187	2.96524	2.99387	3.05021	3.10175	3.10159	3.03629	2.9557	2.91762	2.85861	2.70503	2.50059	2.2673	2.00357	1.70296	1.43576	1.28129
0.193603	0.222741	0.253583	0.28841	0.362026	0.391969	0.419851	0.47714	0.503598	0.520634	0.575281	0.633052	0.685215	0.837763	1.04457	1.1949	1.29255	1.38683	1.49227	1.56894	1.63746	1.69077	1.70405	1.73888	1.87105	2.03962	2.1888	2.34957	2.48023	2.56983	2.65041	2.72793	2.81214	2.85347	2.88204	2.90808	2.96474	3.01755	3.01823	2.95196	2.87042	2.84148	2.77838	2.63192	2.42503	2.2005	1.94444	1.64833	1.38975	1.23684
0.214032	0.232434	0.252763	0.299881	0.349615	0.390764	0.417026	0.45044	0.479335	0.499664	0.55925	0.605401	0.655754	0.791516	0.981578	1.11924	1.19458	1.28801	1.38033	1.46319	1.52668	1.57604	1.58948	1.63237	1.75816	1.91716	2.06449	2.209	2.3372	2.42899	2.49927	2.57719	2.65607	2.69777	2.72633	2.75798	2.81018	2.85725	2.87166	2.80639	2.73363	2.70155	2.64406	2.5094	2.3076	2.09209	1.84191	1.56108	1.31587	1.16715
0.2021	0.221619	0.250906	0.286372	0.332185	0.364954	0.391225	0.433795	0.45905	0.470721	0.518059	0.576455	0.620201	0.749067	0.927876	1.05996	1.13559	1.22475	1.31022	1.3872	1.45574	1.50569	1.52041	1.5584	1.68028	1.83598	1.97495	2.1152	2.23658	2.3256	2.40206	2.47236	2.5492	2.59803	2.62267	2.65553	2.70445	2.75226	2.76345	2.7056	2.63989	2.605	2.55103	2.41801	2.22267	2.01469	1.76908	1.49855	1.25923	1.11956
0.204785	0.215311	0.243478	0.281869	0.32481	0.356007	0.382858	0.420619	0.442145	0.459664	0.49638	0.553649	0.600236	0.71704	0.891132	1.01484	1.09134	1.1758	1.26165	1.33443	1.39761	1.45149	1.46326	1.50418	1.62116	1.77222	1.9101	2.04604	2.16998	2.25215	2.32646	2.39772	2.47551	2.52046	2.54506	2.58121	2.62635	2.67618	2.68992	2.63001	2.56649	2.53705	2.48501	2.35203	2.16509	1.95908	1.72167	1.45765	1.21968	1.08439
0.195239	0.212307	0.236669	0.2645	0.300677	0.33295	0.363333	0.398426	0.410702	0.429421	0.477179	0.524118	0.567964	0.674845	0.835546	0.95294	1.02407	1.10011	1.18553	1.25694	1.31931	1.36826	1.38044	1.42186	1.5352	1.67903	1.80697	1.93665	2.05511	2.13999	2.21052	2.27573	2.3563	2.3994	2.42602	2.46069	2.5026	2.55225	2.56904	2.51422	2.4537	2.42315	2.37287	2.24887	2.067	1.86756	1.63541	1.38278	1.15618	1.02451
0.188975	0.201792	0.225217	0.259675	0.294643	0.32882	0.353571	0.383862	0.40225	0.414787	0.452712	0.500143	0.547452	0.647902	0.802099	0.922861	0.985883	1.06509	1.14491	1.21401	1.27479	1.32291	1.33674	1.37918	1.48933	1.6259	1.75759	1.88276	1.99532	2.0816	2.14791	2.21842	2.29235	2.33617	2.36362	2.40009	2.44699	2.49274	2.50568	2.45757	2.39544	2.3666	2.31475	2.19404	2.01774	1.81945	1.59371	1.34285	1.12255	0.993913
0.185097	0.195183	0.215312	0.244558	0.277548	0.305419	0.322192	0.358202	0.369117	0.385193	0.42391	0.465349	0.503147	0.596811	0.743451	0.844832	0.910123	0.979982	1.05237	1.11798	1.17374	1.22445	1.23741	1.27817	1.38433	1.51515	1.63477	1.75398	1.86732	1.94314	2.01341	2.07567	2.14603	2.19048	2.21836	2.24988	2.29594	2.34227	2.35495	2.30951	2.2584	2.22797	2.18239	2.06517	1.89834	1.71233	1.49261	1.25425	1.04694	0.923442
0.17943	0.184369	0.211598	0.229763	0.264811	0.294407	0.315916	0.342598	0.356608	0.373161	0.403469	0.446344	0.476892	0.563512	0.700348	0.796009	0.857393	0.922744	0.990913	1.05502	1.11113	1.1583	1.17216	1.20967	1.3095	1.43598	1.55398	1.6651	1.77124	1.84884	1.9162	1.97941	2.04506	2.09038	2.11767	2.15455	2.19279	2.23948	2.25441	2.20937	2.16108	2.13271	2.08825	1.97859	1.81598	1.63597	1.42406	1.19436	0.991786	0.877551
0.176148	0.18527	0.207265	0.233301	0.264811	0.284427	0.307548	0.336009	0.349846	0.364706	0.39294	0.436111	0.470601	0.557158	0.685038	0.780534	0.834968	0.901656	0.970603	1.02997	1.08727	1.1319	1.14527	1.18704	1.28451	1.41042	1.52538	1.64173	1.74353	1.8189	1.88431	1.95076	2.0209	2.05998	2.09023	2.1259	2.16893	2.21666	2.22823	2.18714	2.13862	2.1144	2.06693	1.96124	1.79542	1.61743	1.40864	1.17786	0.980485	0.864869
0.172867	0.183167	0.202003	0.2214	0.249057	0.275479	0.2943	0.320752	0.339027	0.353324	0.385507	0.420322	0.45173	0.53606	0.658423	0.74893	0.807896	0.868706	0.937577	0.99707	1.04964	1.09308	1.11134	1.14709	1.24321	1.36421	1.47584	1.58958	1.68941	1.76514	1.83233	1.89362	1.95939	2.00234	2.03167	2.06338	2.10628	2.14768	2.16387	2.12587	2.07824	2.05448	2.01212	1.90486	1.74872	1.57255	1.36579	1.14486	0.949678	0.835191
0.162725	0.173254	0.195813	0.216254	0.24537	0.266876	0.289418	0.310696	0.324151	0.335763	0.364447	0.398978	0.423014	0.503525	0.613671	0.698799	0.753551	0.807891	0.872586	0.930601	0.980304	1.02195	1.03922	1.0754	1.16838	1.28011	1.38537	1.49228	1.58766	1.6591	1.71926	1.77867	1.84591	1.88215	1.90966	1.9413	1.9803	2.02511	2.04283	2.00828	1.96268	1.93962	1.89809	1.7986	1.64716	1.47824	1.28725	1.07387	0.890888	0.783155
0.162128	0.173254	0.182813	0.19792	0.230286	0.250013	0.269197	0.282609	0.296765	0.312349	0.337193	0.3636	0.388554	0.461076	0.558084	0.633412	0.679608	0.732578	0.789933	0.84242	0.890629	0.929089	0.944169	0.982749	1.06597	1.17214	1.26661	1.36859	1.45739	1.52445	1.58037	1.633	1.69715	1.73559	1.763	1.78971	1.82908	1.87058	1.88776	1.85808	1.81279	1.79472	1.76004	1.6654	1.52309	1.36686	1.185	0.98486	0.814205	0.713338
0.158847	0.165143	0.178171	0.189879	0.223247	0.241754	0.257691	0.278447	0.286285	0.29804	0.323566	0.348981	0.37023	0.433878	0.525345	0.6005	0.642839	0.694545	0.748254	0.80167	0.84403	0.881724	0.898785	0.929132	1.01431	1.113	1.20676	1.29991	1.38804	1.45017	1.51	1.56574	1.62312	1.66204	1.68749	1.71747	1.75476	1.79433	1.81273	1.7838	1.74395	1.72355	1.69023	1.5974	1.46339	1.31051	1.13331	0.944097	0.776267	0.680652
0.161234	0.16274	0.182194	0.193738	0.214197	0.234183	0.242699	0.263884	0.281551	0.285683	0.307152	0.33173	0.353821	0.415577	0.504853	0.570421	0.611525	0.660654	0.715051	0.764594	0.803516	0.841504	0.857221	0.891312	0.966916	1.0634	1.1555	1.24919	1.3336	1.39228	1.44975	1.50346	1.56178	1.59688	1.62089	1.65357	1.6916	1.73008	1.74537	1.71693	1.68519	1.66588	1.63053	1.5421	1.41004	1.26269	1.09218	0.906385	0.742096	0.65385
0.159444	0.165443	0.173528	0.189879	0.215203	0.229709	0.244093	0.256255	0.270732	0.277878	0.298171	0.320327	0.33577	0.399563	0.4813	0.546664	0.583847	0.627704	0.680966	0.727351	0.767166	0.801128	0.818408	0.851821	0.926684	1.02151	1.10378	1.1953	1.2743	1.3362	1.39186	1.43946	1.50147	1.53871	1.5632	1.58827	1.62809	1.66702	1.68302	1.65566	1.61847	1.60548	1.56893	1.48572	1.35473	1.21428	1.04977	0.870891	0.715056	0.623256
0.152881	0.159435	0.171671	0.185376	0.207829	0.224203	0.236423	0.248626	0.263294	0.275276	0.291047	0.311848	0.328113	0.383295	0.46599	0.520509	0.555361	0.599839	0.649353	0.692947	0.734179	0.771001	0.784179	0.815824	0.888432	0.975761	1.06159	1.14633	1.22261	1.28326	1.33482	1.38438	1.44239	1.47111	1.50063	1.53253	1.5651	1.60464	1.62533	1.59851	1.56476	1.54877	1.51728	1.43554	1.30863	1.17058	1.01406	0.837615	0.685997	0.602598
0.153478	0.152526	0.165481	0.179908	0.195762	0.214568	0.225266	0.232675	0.24639	0.256089	0.26782	0.287873	0.302951	0.34771	0.423122	0.471032	0.502025	0.545425	0.588777	0.628649	0.666923	0.696927	0.714804	0.743222	0.809338	0.89074	0.972359	1.05062	1.12394	1.17805	1.22597	1.27388	1.33013	1.36245	1.38421	1.41514	1.44924	1.48731	1.50528	1.47763	1.4549	1.44259	1.41162	1.33424	1.21901	1.08686	0.93752	0.773559	0.628687	0.551216
0.151986	0.156732	0.157743	0.178943	0.195091	0.210438	0.217596	0.223313	0.234218	0.241781	0.260697	0.274423	0.287909	0.332459	0.398156	0.449018	0.472933	0.514358	0.555928	0.598087	0.631053	0.66152	0.678741	0.706313	0.774135	0.850848	0.925324	1.00054	1.07161	1.12578	1.16995	1.21795	1.26948	1.3048	1.32757	1.35315	1.38779	1.41917	1.44109	1.42196	1.39534	1.38411	1.35634	1.28003	1.16717	1.04184	0.89625	0.738897	0.601646	0.524544
0.152583	0.147119	0.163933	0.17444	0.190063	0.205964	0.208879	0.227474	0.23219	0.236252	0.245521	0.264774	0.277517	0.318987	0.380019	0.419812	0.452933	0.491199	0.531732	0.566188	0.597425	0.630462	0.647262	0.67305	0.733445	0.81034	0.88532	0.955542	1.02316	1.07036	1.11898	1.16287	1.21369	1.24262	1.26692	1.29758	1.32806	1.36321	1.38173	1.36283	1.34065	1.32901	1.29979	1.22767	1.12063	0.999317	0.859691	0.702709	0.572587	0.503233
0.145722	0.151024	0.156814	0.166399	0.191069	0.197361	0.207485	0.222272	0.226104	0.224545	0.243044	0.255711	0.266304	0.310853	0.360234	0.402375	0.430103	0.462957	0.502239	0.53312	0.567159	0.594278	0.613797	0.640394	0.698393	0.771526	0.842191	0.913887	0.974714	1.02156	1.06852	1.11535	1.16208	1.19073	1.21518	1.24236	1.27743	1.31148	1.32554	1.30914	1.28792	1.27809	1.25051	1.17966	1.0771	0.961209	0.826275	0.675118	0.55187	0.4763
0.137072	0.143514	0.158671	0.17058	0.189058	0.19392	0.202604	0.214644	0.222723	0.22422	0.233753	0.251617	0.256732	0.298144	0.345396	0.38363	0.415153	0.448271	0.480516	0.514415	0.544581	0.573625	0.587514	0.615181	0.669133	0.739335	0.80875	0.876684	0.937124	0.98252	1.03089	1.07228	1.12037	1.14654	1.17235	1.19947	1.22988	1.26295	1.27835	1.26517	1.24365	1.23439	1.20882	1.14093	1.04113	0.929134	0.797714	0.651271	0.530614	0.46218
0.14781	0.144115	0.150933	0.160609	0.176656	0.188069	0.199466	0.210829	0.206833	0.214139	0.222294	0.23115	0.248527	0.27425	0.319958	0.356604	0.378384	0.403836	0.437777	0.470325	0.498142	0.52626	0.539073	0.564146	0.616709	0.680036	0.743119	0.807365	0.862592	0.905764	0.950894	0.989409	1.03314	1.06408	1.08635	1.11264	1.13789	1.17301	1.19015	1.17673	1.15495	1.14749	1.12352	1.05946	0.967833	0.861158	0.734879	0.603021	0.491196	0.426487
0.144827	0.148921	0.1531	0.165112	0.181013	0.189446	0.194236	0.203548	0.204128	0.208936	0.213312	0.222087	0.234032	0.2651	0.307239	0.340039	0.359797	0.388962	0.418703	0.450952	0.475723	0.502035	0.514471	0.540604	0.591259	0.652927	0.709053	0.77207	0.828728	0.868874	0.909548	0.950461	0.992818	1.02251	1.04474	1.06663	1.09772	1.12652	1.1398	1.1288	1.11199	1.10267	1.08072	1.02074	0.928539	0.827317	0.707603	0.577094	0.468729	0.405829
0.13916	0.144715	0.154957	0.157071	0.170287	0.185316	0.192841	0.204241	0.201762	0.205033	0.213932	0.215362	0.226921	0.254932	0.292165	0.323692	0.342827	0.37164	0.395744	0.424899	0.451383	0.473306	0.486202	0.508252	0.55956	0.618118	0.672331	0.731051	0.786925	0.825864	0.864995	0.902933	0.941727	0.969402	0.994053	1.01627	1.04039	1.07242	1.09078	1.08005	1.06381	1.05415	1.03413	0.975201	0.889698	0.79068	0.672331	0.547839	0.443169	0.387133
0.143634	0.146217	0.155886	0.159644	0.170622	0.184628	0.192841	0.197999	0.197028	0.201131	0.20557	0.21887	0.221725	0.246544	0.280152	0.310832	0.329291	0.349234	0.376847	0.400182	0.426562	0.450788	0.460683	0.48638	0.530452	0.586389	0.640141	0.694802	0.744636	0.785997	0.825506	0.85798	0.901757	0.925555	0.946857	0.973376	0.997141	1.02542	1.04243	1.03344	1.01564	1.00805	0.987534	0.930127	0.850102	0.74963	0.639914	0.523575	0.423662	0.368568
0.141248	0.139909	0.154648	0.152568	0.168276	0.180842	0.18273	0.193145	0.186885	0.197228	0.198756	0.211268	0.211332	0.234597	0.274028	0.298408	0.314745	0.336807	0.359363	0.386988	0.41167	0.434793	0.446471	0.467546	0.508355	0.565442	0.616545	0.667774	0.720656	0.757213	0.795635	0.826067	0.869782	0.892888	0.914693	0.936736	0.959552	0.98839	1.00358	0.996057	0.981462	0.97351	0.95326	0.901163	0.819423	0.725205	0.61835	0.50361	0.407114	0.354709
0.141248	0.147119	0.151552	0.164147	0.168946	0.172927	0.181684	0.185516	0.192295	0.185521	0.19504	0.20045	0.206409	0.22748	0.253537	0.271599	0.29131	0.311954	0.333578	0.352584	0.374999	0.395504	0.410408	0.429422	0.468579	0.519389	0.569822	0.61658	0.661679	0.696502	0.728468	0.764813	0.801312	0.823362	0.843899	0.866581	0.89347	0.920594	0.931883	0.92392	0.914897	0.908931	0.885817	0.837657	0.761238	0.675915	0.574794	0.465481	0.3755	0.326337
0.138563	0.14081	0.148148	0.151281	0.171963	0.178433	0.18552	0.184129	0.184181	0.184871	0.192252	0.194895	0.19629	0.21833	0.24388	0.264625	0.277774	0.294632	0.315564	0.33772	0.357545	0.37718	0.390696	0.407702	0.44572	0.495515	0.537787	0.588916	0.633486	0.666561	0.700961	0.731356	0.766382	0.791743	0.810687	0.828378	0.85262	0.879173	0.891367	0.889334	0.873558	0.867004	0.850279	0.802807	0.730105	0.644134	0.549518	0.446209	0.361374	0.312086
0.134387	0.14081	0.150005	0.148708	0.15755	0.16983	0.17506	0.179968	0.177081	0.182269	0.180174	0.191386	0.191914	0.207908	0.235165	0.254599	0.26545	0.282582	0.301436	0.322189	0.340891	0.360719	0.369456	0.390083	0.426213	0.472874	0.517785	0.560616	0.605617	0.637777	0.670077	0.699957	0.735102	0.756107	0.775902	0.796773	0.816747	0.84536	0.858688	0.851783	0.84231	0.833751	0.815216	0.770589	0.70139	0.620445	0.525955	0.426521	0.342809	0.299143
0.139458	0.140209	0.144743	0.153855	0.1666	0.174304	0.18273	0.184129	0.186209	0.179342	0.183581	0.186708	0.187812	0.206383	0.225037	0.246534	0.256359	0.270908	0.291546	0.305989	0.32744	0.344724	0.35662	0.374591	0.409602	0.450694	0.491845	0.540584	0.577911	0.608497	0.641557	0.671132	0.708166	0.725187	0.745486	0.763432	0.787225	0.810194	0.824507	0.819503	0.807156	0.805317	0.785364	0.740385	0.675698	0.59764	0.505819	0.409051	0.329086	0.283846
0.140949	0.136605	0.145672	0.153855	0.164589	0.169486	0.17506	0.180661	0.180124	0.177716	0.177077	0.1832	0.182889	0.197486	0.222446	0.232367	0.243833	0.262436	0.278477	0.294632	0.312067	0.331369	0.34088	0.358035	0.389638	0.430517	0.473563	0.51292	0.555227	0.585503	0.61658	0.644366	0.678797	0.702128	0.714022	0.735648	0.756673	0.7801	0.794829	0.786893	0.776722	0.775437	0.757881	0.714518	0.651215	0.572774	0.487397	0.396157	0.315499	0.275086
0.13916	0.136605	0.145981	0.153211	0.171293	0.173271	0.170876	0.170952	0.172686	0.172188	0.167476	0.172381	0.171949	0.190115	0.201719	0.212315	0.22363	0.236264	0.253928	0.266909	0.282602	0.298602	0.309707	0.324316	0.353063	0.391241	0.426996	0.465542	0.503379	0.526281	0.554645	0.584485	0.613282	0.633126	0.647248	0.662541	0.685271	0.709768	0.718298	0.716074	0.710971	0.707807	0.694703	0.653027	0.59318	0.525396	0.446269	0.357612	0.286844	0.250376
0.135878	0.14081	0.141648	0.147422	0.160902	0.16398	0.16739	0.1765	0.169305	0.173489	0.171502	0.173259	0.171129	0.178168	0.196066	0.209699	0.216357	0.227227	0.239623	0.258224	0.271393	0.285868	0.297177	0.310494	0.340261	0.375068	0.408869	0.44376	0.481667	0.509408	0.536588	0.560636	0.588952	0.611639	0.628545	0.644308	0.664502	0.685423	0.698624	0.695322	0.685744	0.68114	0.667853	0.631032	0.570662	0.504798	0.426991	0.344025	0.277157	0.237955
0.134983	0.137506	0.142577	0.149352	0.163583	0.165701	0.170528	0.169218	0.169305	0.16731	0.164379	0.165657	0.168941	0.177152	0.184054	0.20316	0.206256	0.216683	0.231146	0.23835	0.253778	0.267388	0.27884	0.294546	0.320145	0.353505	0.385429	0.424364	0.456067	0.47897	0.507224	0.530266	0.558715	0.575828	0.589564	0.607147	0.627943	0.647721	0.659108	0.656618	0.649288	0.645156	0.630893	0.593548	0.537262	0.476842	0.402285	0.323643	0.262224	0.227234
0.137668	0.137506	0.141957	0.152246	0.162242	0.172927	0.161811	0.169912	0.169305	0.165359	0.166237	0.164195	0.165659	0.174101	0.184054	0.193788	0.198579	0.211411	0.222669	0.234843	0.244811	0.261332	0.27013	0.285433	0.308868	0.340105	0.374334	0.408465	0.441809	0.460112	0.487648	0.512937	0.537861	0.559058	0.569637	0.586309	0.605286	0.629631	0.6396	0.633561	0.631223	0.626521	0.613362	0.578214	0.522905	0.461246	0.390718	0.31685	0.255498	0.220043
0.138861	0.137506	0.144743	0.149995	0.156879	0.161571	0.164949	0.175807	0.163895	0.164383	0.165928	0.167119	0.161283	0.168509	0.176752	0.187903	0.193932	0.203503	0.211896	0.224322	0.235363	0.250617	0.2576	0.266598	0.294847	0.326397	0.355895	0.388115	0.418801	0.441584	0.467228	0.493034	0.513532	0.533029	0.546563	0.56356	0.581943	0.597846	0.607087	0.610668	0.604857	0.599212	0.585405	0.552657	0.501293	0.441971	0.371582	0.301737	0.242718	0.210237
0.137966	0.142613	0.151243	0.148708	0.161237	0.162259	0.172968	0.168178	0.159838	0.165359	0.16345	0.162733	0.153079	0.159105	0.167095	0.178313	0.184437	0.186181	0.19759	0.206452	0.215667	0.228876	0.234526	0.244879	0.270311	0.299443	0.325267	0.354409	0.385585	0.403537	0.427569	0.447051	0.472519	0.491978	0.506534	0.519453	0.533884	0.551353	0.563904	0.563565	0.556358	0.554553	0.54197	0.508978	0.465929	0.407394	0.343307	0.279414	0.223345	0.19311
0.139756	0.135103	0.138553	0.14517	0.159226	0.160194	0.166692	0.164364	0.163895	0.163408	0.162521	0.163902	0.154993	0.156817	0.165211	0.17221	0.173325	0.177897	0.18982	0.197433	0.205738	0.216763	0.224593	0.235613	0.258577	0.282962	0.311047	0.339623	0.36598	0.386002	0.409849	0.426976	0.450276	0.467346	0.481013	0.493232	0.509168	0.527177	0.536893	0.536061	0.529341	0.529172	0.515751	0.486518	0.442957	0.385618	0.326741	0.265827	0.212852	0.185265
0.136177	0.137806	0.141029	0.144527	0.159226	0.161227	0.169482	0.170952	0.1666	0.162432	0.160043	0.154254	0.155266	0.153767	0.160736	0.165671	0.167467	0.173001	0.1794	0.190753	0.199813	0.207911	0.217717	0.227563	0.245471	0.274491	0.298546	0.325474	0.351884	0.370618	0.389092	0.413422	0.433593	0.447781	0.460212	0.473957	0.490288	0.507734	0.515884	0.51778	0.510299	0.508931	0.499483	0.469325	0.421043	0.372671	0.315317	0.253487	0.204914	0.176375
0.13379	0.134802	0.141648	0.14324	0.153863	0.161227	0.169482	0.169565	0.155781	0.161782	0.155088	0.156593	0.14925	0.152242	0.155318	0.160222	0.167264	0.16547	0.173925	0.183405	0.190045	0.200612	0.204422	0.215868	0.23907	0.264171	0.288233	0.31196	0.336005	0.35391	0.379641	0.39369	0.415172	0.431011	0.442731	0.455897	0.471579	0.486432	0.494209	0.497028	0.493048	0.486762	0.479424	0.451048	0.411975	0.360311	0.302893	0.244197	0.198188	0.173498
0.138265	0.136004	0.140719	0.1471	0.155203	0.163636	0.162509	0.165404	0.158486	0.159505	0.154469	0.155131	0.145421	0.146141	0.155083	0.157607	0.157769	0.166412	0.16845	0.177893	0.188124	0.198283	0.197699	0.2104	0.22825	0.251233	0.27745	0.301784	0.327094	0.3463	0.363946	0.38391	0.403007	0.41791	0.432069	0.443047	0.457676	0.470032	0.482871	0.480064	0.477261	0.473429	0.461892	0.43463	0.3952	0.346039	0.293896	0.23671	0.191596	0.168792
0.131106	0.130596	0.138553	0.143562	0.152857	0.155032	0.161811	0.166444	0.160514	0.157229	0.151372	0.152792	0.146515	0.147158	0.150137	0.15085	0.149284	0.156997	0.161739	0.165201	0.173712	0.182909	0.191281	0.198097	0.213315	0.236447	0.259167	0.284296	0.30522	0.321652	0.340489	0.359718	0.379547	0.389086	0.402877	0.416478	0.42987	0.443151	0.449858	0.446302	0.447803	0.446601	0.433146	0.410157	0.373286	0.329413	0.276759	0.222846	0.179219	0.15624
0.137966	0.136905	0.142267	0.156106	0.160566	0.159506	0.162509	0.160203	0.162881	0.157229	0.149823	0.148406	0.14378	0.1497	0.14519	0.148235	0.148274	0.151914	0.15803	0.162028	0.167146	0.17561	0.182723	0.19111	0.206457	0.228746	0.249948	0.27428	0.295336	0.309907	0.328844	0.344791	0.366166	0.376858	0.385572	0.398418	0.413564	0.427766	0.433518	0.435102	0.428436	0.431983	0.419721	0.393583	0.357417	0.316612	0.266192	0.21314	0.173838	0.150226
0.134983	0.133901	0.141338	0.142597	0.1485	0.157097	0.15693	0.161936	0.159162	0.154952	0.155398	0.153669	0.14378	0.138516	0.142128	0.146491	0.144637	0.149278	0.152379	0.154679	0.164744	0.171573	0.172791	0.18139	0.201276	0.221507	0.242603	0.261402	0.279458	0.298658	0.3145	0.331064	0.347397	0.362883	0.375084	0.386784	0.395714	0.40883	0.421013	0.418303	0.414439	0.412545	0.402979	0.382896	0.347442	0.303812	0.253768	0.207733	0.168456	0.146696
0.134983	0.132098	0.143815	0.14903	0.14917	0.157097	0.166692	0.163323	0.160514	0.154302	0.148275	0.148698	0.141865	0.135211	0.138831	0.140824	0.141809	0.148525	0.148847	0.152174	0.15946	0.167535	0.170346	0.176985	0.192437	0.212419	0.234634	0.252657	0.271357	0.286417	0.305387	0.322486	0.337666	0.349257	0.362673	0.373239	0.383012	0.393952	0.40384	0.405128	0.401257	0.399694	0.389553	0.367872	0.335352	0.294395	0.246913	0.199275	0.161461	0.141074
0.131702	0.135403	0.135148	0.139702	0.14984	0.160194	0.165298	0.160896	0.162543	0.156253	0.147036	0.149868	0.136943	0.136482	0.135062	0.14126	0.132314	0.138546	0.140899	0.147331	0.155777	0.159149	0.165914	0.17577	0.187103	0.20749	0.22307	0.244549	0.2652	0.2798	0.291886	0.310475	0.325675	0.337727	0.350087	0.355006	0.36911	0.381441	0.390168	0.391952	0.387585	0.386039	0.375654	0.358113	0.322355	0.284684	0.239773	0.19262	0.157963	0.136367
0.134387	0.134502	0.139172	0.143562	0.151852	0.161915	0.160765	0.155695	0.149695	0.149749	0.149513	0.143435	0.13831	0.134449	0.131765	0.134721	0.131101	0.131014	0.137191	0.139815	0.145528	0.150919	0.155371	0.161644	0.17933	0.192858	0.208538	0.226901	0.246404	0.257964	0.27231	0.285082	0.300651	0.314668	0.323692	0.331042	0.34508	0.356927	0.364991	0.36593	0.361708	0.362103	0.354331	0.33457	0.30165	0.265262	0.221922	0.183469	0.148277	0.128
0.128719	0.136004	0.138862	0.144849	0.146824	0.157785	0.161114	0.164017	0.149695	0.1504	0.147965	0.14519	0.138584	0.131907	0.132942	0.134285	0.131708	0.133462	0.134012	0.136976	0.141845	0.150142	0.152773	0.157847	0.172473	0.185465	0.202131	0.220701	0.239923	0.253663	0.267247	0.280964	0.295263	0.304711	0.318273	0.325485	0.335983	0.344416	0.352319	0.356048	0.356012	0.351501	0.343591	0.326516	0.294698	0.260554	0.218209	0.175012	0.145586	0.125908
0.137966	0.132098	0.138862	0.142919	0.148164	0.166045	0.161114	0.153961	0.151724	0.154952	0.148275	0.141096	0.136122	0.131907	0.131765	0.132542	0.125849	0.12706	0.12942	0.136141	0.136881	0.142533	0.144674	0.149645	0.166682	0.18069	0.193224	0.213387	0.231174	0.243572	0.257796	0.270326	0.284489	0.296151	0.304989	0.311767	0.321909	0.331905	0.344483	0.34139	0.339411	0.33881	0.335694	0.314589	0.286083	0.251432	0.212068	0.175982	0.143165	0.12094
0.137966	0.132098	0.145053	0.144849	0.160902	0.163636	0.154838	0.156388	0.155105	0.152676	0.14239	0.139927	0.133934	0.133178	0.134356	0.127529	0.127061	0.125178	0.126594	0.130797	0.131437	0.137719	0.141771	0.149645	0.161043	0.178226	0.189786	0.207346	0.226637	0.230173	0.248683	0.263291	0.275279	0.287417	0.293277	0.302737	0.31264	0.32548	0.32931	0.331344	0.329972	0.327083	0.323058	0.302972	0.274144	0.241132	0.205214	0.166415	0.135362	0.121463
0.129316	0.136004	0.136696	0.137772	0.148835	0.156409	0.165298	0.162283	0.151386	0.154302	0.147965	0.14519	0.135849	0.130382	0.126347	0.13167	0.125647	0.121412	0.125005	0.125286	0.128874	0.133992	0.13413	0.141595	0.152661	0.169447	0.181816	0.197329	0.213513	0.226037	0.24092	0.248364	0.264678	0.273267	0.285411	0.28954	0.298222	0.307052	0.317139	0.318333	0.313209	0.310858	0.304737	0.290426	0.263867	0.23201	0.195789	0.159344	0.134151	0.117017
0.13558	0.132699	0.135767	0.147422	0.155874	0.153312	0.164252	0.156388	0.158148	0.1517	0.137435	0.139635	0.131473	0.126061	0.119752	0.117938	0.115141	0.114069	0.117234	0.116768	0.119427	0.123743	0.127712	0.135519	0.143365	0.156817	0.172753	0.188267	0.199417	0.210818	0.222694	0.233951	0.248169	0.254576	0.263036	0.271306	0.281401	0.288962	0.293963	0.29577	0.293027	0.295597	0.287363	0.269206	0.247243	0.217738	0.18465	0.1495	0.122178	0.106689
0.132895	0.137506	0.136696	0.142597	0.152187	0.157785	0.159371	0.154308	0.156795	0.15105	0.143939	0.139927	0.13284	0.129111	0.124228	0.120118	0.115343	0.111998	0.112289	0.114931	0.120708	0.121569	0.125726	0.1299	0.139707	0.153274	0.162127	0.178251	0.193908	0.203539	0.214762	0.225887	0.238785	0.24619	0.256394	0.261755	0.269902	0.280001	0.284125	0.282265	0.281635	0.281782	0.276938	0.260996	0.23757	0.211117	0.178795	0.147836	0.122447	0.107865
0.135282	0.139308	0.134839	0.142597	0.153863	0.159162	0.15693	0.155695	0.155105	0.149749	0.145178	0.138757	0.127917	0.126823	0.122814	0.121644	0.114939	0.111809	0.113172	0.115432	0.116704	0.119084	0.123281	0.127166	0.136812	0.146497	0.156814	0.174276	0.188399	0.196426	0.209362	0.221255	0.231312	0.241823	0.249052	0.249079	0.263894	0.273577	0.27779	0.279135	0.275613	0.276802	0.271094	0.254491	0.230165	0.205526	0.174368	0.141043	0.118276	0.103289
0.136177	0.138107	0.145362	0.15096	0.1485	0.162603	0.160765	0.154308	0.153076	0.148449	0.142081	0.138757	0.133387	0.126061	0.119046	0.115323	0.11009	0.110868	0.107874	0.110923	0.114943	0.116289	0.120836	0.123824	0.134373	0.143571	0.155876	0.169825	0.179649	0.190967	0.199911	0.211989	0.22384	0.231517	0.236292	0.246648	0.251193	0.26039	0.26912	0.267771	0.26894	0.266681	0.258933	0.245043	0.222609	0.19655	0.165799	0.137161	0.113837	0.0998899
0.136773	0.130897	0.139172	0.14324	0.150511	0.156065	0.160417	0.157082	0.147667	0.149424	0.136816	0.132617	0.125182	0.118181	0.117162	0.114887	0.112919	0.108609	0.10805	0.111424	0.110619	0.117221	0.115029	0.118508	0.12904	0.140644	0.151813	0.162352	0.179163	0.186666	0.197717	0.205813	0.219321	0.226625	0.23367	0.243869	0.24467	0.255149	0.260783	0.260195	0.260966	0.257203	0.253404	0.238537	0.218981	0.193166	0.163086	0.136606	0.112222	0.0996284
0.128421	0.133	0.132982	0.140989	0.148835	0.148494	0.157976	0.154308	0.153076	0.149749	0.14301	0.140512	0.12737	0.124281	0.115277	0.113361	0.109484	0.105596	0.103812	0.104577	0.107737	0.111009	0.113807	0.115774	0.120963	0.134791	0.144782	0.157901	0.167173	0.173929	0.188098	0.197234	0.206461	0.214048	0.221609	0.226157	0.234715	0.242131	0.245277	0.249325	0.248108	0.249011	0.241085	0.225526	0.207193	0.184927	0.158231	0.127455	0.109532	0.0958369
0.134685	0.131197	0.143196	0.14131	0.153192	0.159162	0.161463	0.157775	0.149695	0.1504	0.141771	0.134664	0.123268	0.120469	0.111038	0.115105	0.108474	0.104843	0.107344	0.104243	0.105655	0.107903	0.106319	0.112888	0.121572	0.131865	0.140094	0.151859	0.162151	0.168966	0.183204	0.191572	0.200553	0.209855	0.217064	0.223205	0.22682	0.234692	0.238774	0.239608	0.240459	0.238408	0.236504	0.221809	0.202962	0.178747	0.152661	0.126762	0.103613	0.0943987
0.129912	0.132399	0.137934	0.140989	0.147829	0.150903	0.153095	0.154308	0.149019	0.153326	0.141151	0.136418	0.12737	0.125044	0.117162	0.11031	0.107464	0.102207	0.104341	0.102573	0.103413	0.104021	0.107236	0.115318	0.117762	0.129246	0.13775	0.14852	0.162475	0.166319	0.180166	0.188826	0.199336	0.20182	0.208149	0.21296	0.219954	0.227929	0.232105	0.233021	0.234112	0.231982	0.228923	0.215149	0.196161	0.17345	0.149948	0.123573	0.103209	0.093222
0.130509	0.132699	0.136386	0.145813	0.151181	0.153312	0.15693	0.156388	0.154767	0.146172	0.144558	0.131448	0.124635	0.121485	0.113864	0.109874	0.10706	0.105596	0.097807	0.0997334	0.100691	0.102778	0.105097	0.10742	0.114562	0.125088	0.135406	0.14391	0.153401	0.161026	0.171391	0.182135	0.1903	0.200422	0.204653	0.211397	0.219268	0.223195	0.227436	0.226927	0.226951	0.224914	0.218657	0.2057	0.186186	0.168742	0.143093	0.118859	0.102267	0.0882537
0.133194	0.135703	0.140719	0.140989	0.153192	0.154344	0.160417	0.156388	0.149695	0.149099	0.142081	0.134372	0.122721	0.120214	0.113864	0.110964	0.10504	0.100513	0.0988666	0.0987314	0.10005	0.100449	0.101735	0.105294	0.112581	0.122777	0.12853	0.141207	0.149512	0.157386	0.168184	0.174585	0.188215	0.193959	0.199759	0.202541	0.207939	0.211868	0.218099	0.220998	0.217349	0.219292	0.21376	0.202602	0.186942	0.164328	0.143093	0.11775	0.0995766	0.0866848
0.129316	0.130897	0.132672	0.140346	0.1485	0.15813	0.153444	0.156388	0.150372	0.148774	0.139603	0.134664	0.123542	0.120723	0.120695	0.109874	0.102817	0.0999477	0.0960409	0.0988984	0.0952464	0.0962561	0.0980673	0.101041	0.105723	0.114152	0.122279	0.130396	0.143193	0.147792	0.154346	0.165149	0.172227	0.180857	0.184201	0.191253	0.194552	0.202907	0.206595	0.205846	0.204979	0.203709	0.202546	0.188817	0.169713	0.154028	0.131669	0.113174	0.0929846	0.0859004
0.132597	0.132699	0.139791	0.148065	0.14984	0.154688	0.154141	0.156735	0.156119	0.149099	0.143319	0.134372	0.128464	0.120469	0.113864	0.106169	0.0999891	0.0984414	0.093745	0.0938881	0.0942856	0.0945478	0.0980673	0.0989145	0.105418	0.11292	0.121342	0.131032	0.140439	0.146634	0.153671	0.162232	0.167535	0.176664	0.180006	0.184481	0.189574	0.195468	0.198425	0.19827	0.201236	0.198729	0.193069	0.183551	0.166237	0.149909	0.127385	0.108876	0.0920428	0.082501
0.132001	0.130296	0.136386	0.141954	0.151852	0.152623	0.154489	0.155348	0.148343	0.145197	0.136196	0.133494	0.123542	0.118181	0.11198	0.105079	0.103222	0.0942992	0.0955111	0.0932201	0.0942856	0.095169	0.0956224	0.0989145	0.101456	0.109531	0.118685	0.126421	0.136874	0.142167	0.149115	0.158457	0.167013	0.171948	0.174937	0.177535	0.184596	0.192763	0.195757	0.194482	0.19554	0.194713	0.190068	0.179214	0.164272	0.145642	0.127099	0.10846	0.0880069	0.0805399
0.134983	0.137506	0.136386	0.144205	0.152522	0.157441	0.160765	0.147373	0.139891	0.146172	0.136196	0.128524	0.118072	0.115639	0.111038	0.11031	0.0963526	0.0980648	0.0944515	0.091884	0.0926842	0.0920632	0.0925662	0.0966362	0.103437	0.105373	0.11181	0.124195	0.133796	0.13919	0.147427	0.154168	0.164407	0.169327	0.174063	0.177709	0.18082	0.18786	0.189755	0.191352	0.18903	0.18636	0.185488	0.176116	0.160192	0.143435	0.122244	0.105549	0.0929846	0.0806706
0.128123	0.131498	0.139172	0.136164	0.1485	0.155032	0.157627	0.155695	0.15071	0.144221	0.136506	0.140219	0.123542	0.117164	0.112451	0.103335	0.101201	0.0958055	0.0909193	0.090882	0.0955666	0.0915973	0.0925662	0.0957249	0.0999318	0.111226	0.11681	0.121174	0.129583	0.135054	0.146921	0.151594	0.160062	0.163563	0.173364	0.17493	0.175671	0.182957	0.186086	0.191023	0.188379	0.185396	0.179328	0.171469	0.159889	0.141228	0.120387	0.101944	0.0863925	0.0806706
0.128421	0.134802	0.138243	0.144527	0.146824	0.160883	0.154141	0.158816	0.156457	0.139993	0.141461	0.134079	0.124088	0.115893	0.111744	0.104425	0.100595	0.0967469	0.0895064	0.0895459	0.0885208	0.0875597	0.0907325	0.0893456	0.0964267	0.10414	0.110247	0.115769	0.125857	0.13555	0.137808	0.146961	0.15259	0.157973	0.1634	0.167289	0.171552	0.175857	0.181084	0.182459	0.183985	0.178649	0.171115	0.167597	0.151275	0.137696	0.116674	0.0973683	0.0843746	0.0772713
0.124841	0.124588	0.137315	0.139059	0.14079	0.154	0.155187	0.154308	0.146314	0.145522	0.13279	0.133787	0.122995	0.112843	0.109624	0.101155	0.0979688	0.094864	0.0880936	0.0852037	0.0873998	0.0874044	0.0866067	0.0887381	0.0947503	0.0996738	0.107434	0.114497	0.122778	0.129926	0.139664	0.147648	0.151721	0.156924	0.161477	0.166421	0.169149	0.171123	0.175582	0.176859	0.177475	0.174794	0.168904	0.161246	0.149915	0.13343	0.115675	0.0987548	0.08424	0.0792324
0.136177	0.127893	0.137315	0.146135	0.147159	0.155032	0.153444	0.151187	0.146653	0.148123	0.134338	0.125308	0.120533	0.121231	0.110096	0.102681	0.0989789	0.0931695	0.0923322	0.0878758	0.0849978	0.0870938	0.0885932	0.092839	0.0949027	0.0978255	0.103996	0.114974	0.122454	0.126287	0.133757	0.139584	0.154154	0.153605	0.155709	0.161733	0.166746	0.172475	0.174749	0.172742	0.172429	0.17383	0.169378	0.156755	0.146741	0.131223	0.113818	0.0952886	0.0828947	0.0741335
0.129018	0.131197	0.133291	0.140989	0.154533	0.146773	0.154838	0.1498	0.141243	0.143896	0.133099	0.128232	0.122995	0.119706	0.11198	0.104861	0.0967566	0.0926046	0.0932152	0.0862058	0.0824357	0.0858515	0.0867595	0.0902569	0.0921596	0.0985956	0.104153	0.114974	0.121806	0.123805	0.134939	0.139584	0.148245	0.148015	0.152562	0.155134	0.161768	0.166727	0.166745	0.170107	0.170314	0.169974	0.164165	0.153657	0.142207	0.128868	0.11239	0.0927929	0.0804732	0.0746564
0.133194	0.130296	0.138862	0.146135	0.151852	0.157441	0.148562	0.14876	0.148343	0.144546	0.134957	0.127354	0.120533	0.111572	0.103972	0.0976681	0.0933221	0.0941109	0.0880936	0.0873748	0.0846776	0.0819692	0.0882876	0.0891937	0.0904832	0.0953611	0.101653	0.109409	0.117107	0.120331	0.126163	0.136495	0.144248	0.148015	0.150989	0.155829	0.160224	0.165036	0.166745	0.164342	0.165757	0.165637	0.161954	0.152573	0.140091	0.126956	0.111533	0.0941794	0.079666	0.0716493
0.128421	0.132098	0.137315	0.132948	0.146488	0.159162	0.154141	0.146679	0.14361	0.145197	0.135577	0.130863	0.114516	0.113351	0.108447	0.09854	0.0943323	0.0880859	0.0895064	0.0880428	0.0885208	0.0833668	0.0841617	0.0846371	0.089264	0.0959772	0.098371	0.108296	0.114677	0.120331	0.126669	0.133235	0.140599	0.143299	0.149066	0.15114	0.153015	0.157935	0.16041	0.161378	0.160223	0.160014	0.156268	0.1487	0.138429	0.119893	0.107392	0.0937634	0.0795315	0.072303
0.129018	0.128494	0.136386	0.138416	0.144142	0.154	0.151352	0.150147	0.14361	0.138367	0.138364	0.134664	0.122995	0.110555	0.109153	0.09854	0.0937262	0.0907218	0.0835018	0.0845357	0.082756	0.082435	0.078355	0.0832701	0.0849969	0.0922806	0.0985272	0.103845	0.111112	0.11603	0.123632	0.129117	0.134516	0.142425	0.145221	0.149751	0.149067	0.151511	0.157909	0.156931	0.160223	0.155516	0.152477	0.146532	0.13586	0.119452	0.102394	0.0927929	0.0787243	0.0743949
0.134983	0.136004	0.137315	0.133591	0.142131	0.156409	0.158325	0.153614	0.147667	0.141619	0.131551	0.135249	0.11561	0.108268	0.108918	0.0994118	0.0949384	0.0884624	0.0836784	0.0838676	0.0833965	0.0819692	0.0811055	0.0823588	0.0857589	0.0939749	0.0979022	0.100983	0.113543	0.115203	0.121775	0.128259	0.131736	0.136137	0.14155	0.144368	0.146492	0.151511	0.15374	0.155613	0.156643	0.150376	0.150582	0.143124	0.134046	0.117833	0.103822	0.0883561	0.0772444	0.0716493
0.127824	0.132098	0.138243	0.147422	0.143137	0.156065	0.156233	0.147026	0.151048	0.137717	0.134648	0.130571	0.118619	0.111318	0.106327	0.0994118	0.0933221	0.0897804	0.0842082	0.0825316	0.0833965	0.0846091	0.0841617	0.0831182	0.0868257	0.0924346	0.0982147	0.10305	0.105603	0.113053	0.11975	0.123455	0.131736	0.133691	0.139977	0.143499	0.148209	0.149482	0.151739	0.154461	0.15176	0.151018	0.145844	0.137858	0.128605	0.115479	0.099966	0.0873856	0.0758991	0.0698189
0.132597	0.128794	0.143196	0.142275	0.145818	0.152279	0.159719	0.156735	0.148343	0.140644	0.134648	0.130278	0.120807	0.107759	0.108211	0.0996298	0.0947363	0.090157	0.0845614	0.0838676	0.0805141	0.0830562	0.0794246	0.0823588	0.0839302	0.0892001	0.0946206	0.0979622	0.105117	0.110737	0.119075	0.123112	0.128086	0.131595	0.13683	0.142631	0.142545	0.146101	0.149905	0.150508	0.149482	0.147002	0.145528	0.137083	0.128001	0.114008	0.0988236	0.0876629	0.0758991	0.0715186
0.125736	0.1333	0.134839	0.137772	0.143137	0.14987	0.153444	0.146679	0.142595	0.143245	0.13279	0.125893	0.12026	0.115639	0.102794	0.101591	0.0935242	0.0877093	0.0865041	0.0816965	0.0801938	0.0788633	0.078355	0.0803842	0.0846921	0.0904323	0.0896201	0.0992341	0.106737	0.107097	0.116038	0.116935	0.12183	0.12845	0.135781	0.132733	0.137224	0.140183	0.142236	0.14672	0.141995	0.142665	0.141105	0.13476	0.12392	0.111359	0.0988236	0.0858604	0.0756301	0.0681193
0.123648	0.12579	0.139481	0.140346	0.149505	0.150215	0.154141	0.150493	0.149019	0.137717	0.13217	0.130278	0.12026	0.112843	0.104443	0.0994118	0.0953424	0.0895921	0.0840316	0.0803605	0.0798736	0.0771551	0.0803415	0.0782578	0.0814918	0.088276	0.0919641	0.0960543	0.0992842	0.102796	0.111819	0.119337	0.126001	0.125306	0.130712	0.136206	0.136537	0.138662	0.141235	0.141614	0.142158	0.142344	0.136683	0.131197	0.121049	0.107828	0.095539	0.0800372	0.073343	0.0698189
0.128421	0.127292	0.135458	0.142275	0.143472	0.151935	0.158325	0.147026	0.142933	0.14227	0.138054	0.129401	0.119166	0.113097	0.103972	0.10072	0.0931201	0.0846968	0.0845614	0.0793584	0.0789128	0.0780869	0.0782022	0.077954	0.080425	0.088584	0.0874324	0.0931925	0.0994463	0.103789	0.113	0.113847	0.121135	0.126005	0.131936	0.133254	0.136022	0.138662	0.141735	0.14392	0.140042	0.140416	0.135735	0.127635	0.120293	0.106798	0.0923973	0.0829488	0.0729395	0.0657659
0.125438	0.130897	0.13391	0.137129	0.143137	0.150903	0.152746	0.15188	0.146653	0.13414	0.134957	0.130278	0.12026	0.110047	0.106327	0.101591	0.0933221	0.0890273	0.0833252	0.0785234	0.0798736	0.0779316	0.0766741	0.0768908	0.0801202	0.0830392	0.0875887	0.0933515	0.0987982	0.105443	0.109456	0.114533	0.118007	0.119192	0.129489	0.131691	0.133276	0.134266	0.1364	0.13865	0.141344	0.13881	0.132892	0.128564	0.121351	0.109594	0.0931113	0.0819783	0.0728049	0.0668118
0.13379	0.1336	0.132363	0.144849	0.143137	0.156753	0.159022	0.148066	0.145976	0.147473	0.134648	0.122384	0.118345	0.109793	0.101145	0.0967963	0.0876653	0.0869562	0.0804994	0.0785234	0.0747493	0.074981	0.0757572	0.0774984	0.0807298	0.081653	0.0889951	0.0935105	0.0994463	0.103789	0.105406	0.112989	0.119745	0.123035	0.125818	0.127176	0.128985	0.132068	0.1364	0.136509	0.134997	0.135757	0.135103	0.125931	0.117271	0.108122	0.0925401	0.0828101	0.073074	0.0657659
0.128421	0.133	0.131744	0.141632	0.148164	0.150903	0.156581	0.149453	0.14361	0.146497	0.137435	0.128524	0.120807	0.111572	0.103736	0.098322	0.0878674	0.086203	0.0796164	0.0791914	0.0763506	0.0756022	0.0756044	0.0770427	0.0796631	0.0827311	0.0847759	0.0896948	0.0963678	0.10015	0.105068	0.109729	0.115401	0.119366	0.124245	0.12544	0.130358	0.133252	0.135233	0.136509	0.133532	0.131099	0.129102	0.123608	0.113039	0.102531	0.0898268	0.078512	0.0721323	0.0639355
0.132597	0.127893	0.137005	0.142275	0.143137	0.151247	0.14926	0.147026	0.144286	0.139668	0.13279	0.125308	0.122721	0.110555	0.101381	0.09854	0.0904937	0.0877093	0.0782035	0.0781894	0.0757101	0.0766892	0.0733123	0.0761314	0.0810346	0.081961	0.0874324	0.0906487	0.0957197	0.0998187	0.104393	0.1087	0.111056	0.11465	0.117253	0.124745	0.127955	0.127165	0.133065	0.134203	0.133858	0.134633	0.128628	0.123298	0.114097	0.10312	0.0906836	0.0794826	0.0724013	0.0645892
0.129018	0.126992	0.133291	0.139702	0.145148	0.152968	0.154141	0.147373	0.144286	0.140319	0.133409	0.124138	0.119166	0.109793	0.102558	0.0974502	0.0882714	0.0848851	0.0813825	0.0773543	0.0741088	0.0718752	0.0740763	0.074005	0.0785963	0.0796507	0.0844634	0.0882639	0.0939374	0.0953523	0.101693	0.106126	0.110708	0.115523	0.120224	0.122661	0.127269	0.128349	0.129564	0.130086	0.129626	0.127083	0.127364	0.120355	0.112586	0.10312	0.0919689	0.0814237	0.0703834	0.064197
0.124841	0.128794	0.136696	0.136164	0.137773	0.147461	0.157627	0.147719	0.142595	0.135115	0.128454	0.128232	0.119439	0.107759	0.100674	0.0974502	0.0910998	0.0845085	0.0782035	0.0768533	0.0777918	0.0751363	0.0714786	0.0724861	0.0758531	0.0782644	0.0841509	0.0855611	0.091993	0.10015	0.101187	0.108185	0.11123	0.112554	0.120224	0.123009	0.121261	0.123277	0.127563	0.129097	0.130603	0.126601	0.12231	0.1202	0.11183	0.100177	0.088256	0.0769869	0.071056	0.0665503
0.126631	0.136605	0.132053	0.137772	0.143807	0.146429	0.155535	0.14876	0.138876	0.137717	0.135267	0.125893	0.115063	0.110555	0.102558	0.100284	0.09211	0.0841319	0.0810293	0.0776883	0.0761905	0.0726516	0.0717842	0.0715748	0.074634	0.082115	0.0804005	0.0861971	0.091831	0.0978336	0.100512	0.103381	0.110882	0.115174	0.117602	0.118494	0.122119	0.127334	0.126063	0.129427	0.125232	0.124191	0.121836	0.118342	0.109261	0.0985586	0.0865423	0.0762936	0.0713251	0.0634125
0.120964	0.127893	0.136386	0.134234	0.143807	0.146085	0.145076	0.151534	0.142257	0.138042	0.134648	0.134079	0.120533	0.10903	0.105149	0.0972322	0.0929181	0.0848851	0.0767907	0.0755172	0.0761905	0.0735834	0.0708674	0.0718785	0.0752436	0.082115	0.083057	0.0833353	0.0921551	0.0933672	0.099499	0.103209	0.1048	0.109584	0.115155	0.116931	0.117657	0.121755	0.124062	0.12778	0.128812	0.12146	0.12073	0.115553	0.110621	0.0991472	0.0869707	0.0768482	0.0694416	0.0651122
0.12514	0.129996	0.138243	0.134556	0.143137	0.14815	0.14926	0.15084	0.140229	0.138693	0.127215	0.122092	0.116157	0.110555	0.100203	0.0972322	0.0917059	0.0833788	0.0785567	0.0760182	0.0729878	0.0745151	0.0681168	0.072638	0.0732624	0.0767242	0.0799317	0.0833353	0.0866462	0.0907204	0.100005	0.100121	0.105669	0.110981	0.113232	0.117104	0.115425	0.120065	0.120727	0.121851	0.121488	0.119532	0.119941	0.112765	0.107749	0.0969401	0.0868279	0.0765709	0.0703834	0.0673348
0.128719	0.132699	0.136386	0.137129	0.141125	0.149526	0.154141	0.147719	0.144286	0.138693	0.133099	0.127939	0.112602	0.110047	0.102558	0.0972322	0.0898876	0.0854499	0.0785567	0.0748492	0.076831	0.0715646	0.0697977	0.0673219	0.0708241	0.0762621	0.0799317	0.0822224	0.0876183	0.0945252	0.0993303	0.100464	0.106711	0.108536	0.113582	0.114326	0.113194	0.118712	0.118059	0.122674	0.11921	0.120175	0.11773	0.114159	0.109261	0.0984115	0.0853998	0.0778188	0.070787	0.0644584
0.125736	0.124288	0.128958	0.139059	0.144142	0.153656	0.147865	0.15084	0.144286	0.139668	0.13217	0.124138	0.11561	0.107505	0.105385	0.0937449	0.0898876	0.0845085	0.0785567	0.0763523	0.0718669	0.0714093	0.0702561	0.071271	0.0721956	0.0750299	0.0789941	0.0822224	0.0889145	0.0892316	0.09528	0.100121	0.106538	0.110283	0.112358	0.114673	0.114567	0.117021	0.121061	0.118886	0.120186	0.119854	0.11615	0.112146	0.105785	0.0951745	0.0868279	0.0767096	0.066751	0.0638047
0.124245	0.131197	0.128648	0.131018	0.144142	0.148494	0.144379	0.142518	0.142933	0.143571	0.134648	0.125308	0.114243	0.111318	0.101852	0.0946167	0.0882714	0.0852616	0.0778503	0.0765193	0.0721872	0.0687693	0.071173	0.0730936	0.0735672	0.0773403	0.0783691	0.0839713	0.0898867	0.0900587	0.0961238	0.0989196	0.105843	0.107313	0.110086	0.110853	0.111821	0.115331	0.118726	0.120204	0.116443	0.114713	0.116782	0.111217	0.100344	0.0950274	0.0841146	0.0757391	0.0684999	0.0627588
0.125438	0.122486	0.132053	0.137772	0.142466	0.146085	0.141241	0.141478	0.143272	0.139343	0.124737	0.122384	0.111508	0.11208	0.103501	0.092873	0.0846349	0.0824374	0.0783801	0.0730121	0.0704257	0.0698564	0.0705617	0.0711191	0.0702145	0.0713334	0.077119	0.0811095	0.085836	0.0879082	0.0937612	0.0990912	0.104974	0.108186	0.105541	0.109637	0.111478	0.113809	0.116059	0.113616	0.117582	0.11648	0.114729	0.10657	0.101704	0.0942917	0.0862567	0.0772642	0.0648676	0.0638047
0.120665	0.129094	0.132053	0.142275	0.146153	0.147117	0.14926	0.1498	0.143948	0.13414	0.126286	0.122384	0.11479	0.108268	0.0987898	0.0972322	0.0896856	0.086203	0.07891	0.0741811	0.0718669	0.0710987	0.0727011	0.0694483	0.0711288	0.0731817	0.0785254	0.0822224	0.0834056	0.0869157	0.091736	0.0985765	0.100455	0.102422	0.106939	0.107727	0.111649	0.112964	0.114725	0.114604	0.116606	0.115516	0.111412	0.107964	0.101855	0.0972344	0.085257	0.0729661	0.0656748	0.0613206
0.123648	0.124288	0.128029	0.132626	0.14079	0.14987	0.148214	0.142865	0.139214	0.140969	0.124118	0.124138	0.116157	0.107505	0.0999675	0.0933089	0.0866552	0.081496	0.0790866	0.0731791	0.0733081	0.0700117	0.0673528	0.0689927	0.0702145	0.0745679	0.0758689	0.0787247	0.0834056	0.0885699	0.0908922	0.0973754	0.0992389	0.103644	0.105366	0.105991	0.108731	0.11178	0.112057	0.114275	0.114327	0.111661	0.112675	0.107499	0.0997395	0.0951745	0.0836862	0.073382	0.0675582	0.0601439
0.129316	0.130897	0.128958	0.134556	0.146153	0.147461	0.148911	0.140091	0.134481	0.136416	0.128454	0.121214	0.112602	0.108522	0.101616	0.0970142	0.0892816	0.0799897	0.07891	0.0755172	0.0712264	0.0681482	0.0667415	0.0705116	0.0726528	0.0737978	0.0743062	0.0807915	0.08535	0.0870811	0.0902172	0.0923997	0.0976749	0.101898	0.103968	0.104602	0.106328	0.109921	0.109723	0.113287	0.111072	0.110536	0.111412	0.108428	0.101402	0.089142	0.0829721	0.0724115	0.0658093	0.0601439
0.132001	0.127893	0.136696	0.139059	0.141461	0.149182	0.144379	0.146332	0.137524	0.132514	0.131551	0.123261	0.115063	0.104201	0.100439	0.0946167	0.0886755	0.0830022	0.0743182	0.0731791	0.0725074	0.070167	0.067964	0.0674738	0.0702145	0.0728736	0.0752438	0.0763398	0.0843778	0.0847652	0.0925798	0.0948017	0.0975011	0.102422	0.105366	0.107727	0.106157	0.110428	0.110223	0.110981	0.113514	0.112625	0.110148	0.105331	0.101553	0.0934089	0.079402	0.0760164	0.0660784	0.0610591
0.12514	0.122486	0.130196	0.134556	0.138779	0.148838	0.143681	0.147026	0.15071	0.140319	0.126905	0.127062	0.115063	0.108522	0.0999675	0.0898216	0.0834227	0.0818725	0.0785567	0.0696719	0.069625	0.0672164	0.0688808	0.0692965	0.0683857	0.0694851	0.0727436	0.0780887	0.0817854	0.0804641	0.0871795	0.0891397	0.0973273	0.0966569	0.0952277	0.102865	0.102896	0.10637	0.107055	0.107687	0.108468	0.110054	0.106989	0.100994	0.0950544	0.0882592	0.0825437	0.0725501	0.0658093	0.0607976
0.123947	0.127592	0.127101	0.133591	0.141796	0.148838	0.150306	0.140437	0.141581	0.136091	0.13217	0.122969	0.110687	0.104963	0.0964344	0.0941808	0.0860491	0.081496	0.0767907	0.0731791	0.0715466	0.0664399	0.0694921	0.0654993	0.0700621	0.0699472	0.0722748	0.0785657	0.079679	0.0817875	0.0849856	0.0889681	0.0943731	0.0987531	0.0985489	0.0990448	0.104784	0.106539	0.106888	0.106863	0.103586	0.107002	0.10541	0.103937	0.0971702	0.089142	0.0791164	0.0715796	0.066751	0.0593595
0.124245	0.12609	0.130196	0.136486	0.142131	0.147806	0.147168	0.141824	0.144286	0.138693	0.137745	0.129401	0.116431	0.105217	0.103029	0.0950526	0.0848369	0.0803663	0.0782035	0.0745152	0.0715466	0.0692352	0.0668943	0.0668662	0.0703669	0.0701012	0.071806	0.074591	0.0804892	0.0859231	0.0880233	0.0925712	0.0954157	0.1005	0.0997725	0.099913	0.101866	0.102313	0.106888	0.104722	0.104074	0.107324	0.10541	0.101613	0.0967169	0.0873764	0.0792592	0.0713023	0.0674237	0.0589672
0.128421	0.126691	0.132363	0.135843	0.142466	0.148838	0.148911	0.149106	0.142595	0.139343	0.130312	0.128232	0.116978	0.107759	0.0999675	0.093091	0.0878674	0.0784834	0.0729053	0.0726781	0.069625	0.0689246	0.0641438	0.0661068	0.071586	0.0717954	0.0743062	0.0758629	0.0804892	0.0798024	0.0895422	0.0906839	0.0921139	0.0973556	0.0969757	0.100955	0.101008	0.103496	0.104054	0.108016	0.105702	0.10154	0.104146	0.0992899	0.0965657	0.0876707	0.0799732	0.073382	0.0663474	0.0619743
0.119174	0.121885	0.130196	0.132626	0.139114	0.147117	0.143681	0.143905	0.1382	0.135115	0.136816	0.122969	0.117525	0.108522	0.103501	0.0961424	0.0876653	0.0811194	0.0732585	0.072177	0.0678636	0.0693905	0.0653662	0.0673219	0.0677761	0.0699472	0.0736811	0.0750679	0.0791929	0.0814567	0.0873483	0.0875955	0.0914188	0.09491	0.0952277	0.102344	0.100836	0.103496	0.103387	0.106534	0.10798	0.105075	0.104778	0.0997545	0.0986816	0.0898777	0.0775455	0.0717182	0.0645985	0.0615821
0.12514	0.124588	0.13391	0.134556	0.139114	0.146773	0.148562	0.143558	0.136172	0.13479	0.128144	0.122384	0.11561	0.101913	0.100203	0.0902575	0.0830187	0.0792366	0.0744948	0.0725111	0.0680237	0.0689246	0.0671999	0.0689927	0.0689953	0.0705633	0.0725873	0.0757039	0.0791929	0.0844343	0.0907235	0.0893113	0.0938517	0.0973556	0.0992481	0.100434	0.100493	0.103496	0.107555	0.107028	0.107166	0.103789	0.104146	0.101303	0.0979259	0.0884063	0.0791164	0.0740753	0.0663474	0.0619743
0.124543	0.120683	0.126482	0.129731	0.139785	0.142299	0.142287	0.138704	0.137186	0.137067	0.123498	0.117998	0.108226	0.103438	0.101145	0.0913473	0.0838268	0.0824374	0.0739649	0.0740141	0.0689845	0.0672164	0.0641438	0.068537	0.0659474	0.0671747	0.0714934	0.0722062	0.0800031	0.079637	0.0836356	0.0889681	0.0954157	0.097705	0.0973253	0.100434	0.103582	0.107046	0.107555	0.107687	0.106515	0.105396	0.107621	0.100684	0.0964146	0.089142	0.0799732	0.0746299	0.0641949	0.0597517
0.119472	0.122185	0.125244	0.131983	0.139449	0.13989	0.145773	0.148066	0.140905	0.13414	0.126595	0.121214	0.112328	0.110047	0.0997319	0.0893857	0.0846349	0.0798014	0.0734351	0.072177	0.0693048	0.0670611	0.0678112	0.0676257	0.0679285	0.0697931	0.0716497	0.0763398	0.0804892	0.0799679	0.0886984	0.0894828	0.0941993	0.0938618	0.0969757	0.0983502	0.101523	0.106201	0.101386	0.103734	0.107817	0.107966	0.104462	0.101613	0.0961123	0.086935	0.0796876	0.0728274	0.0625806	0.0592287
0.12156	0.122786	0.131744	0.136486	0.137103	0.14815	0.148214	0.144598	0.139553	0.129912	0.120711	0.120045	0.112055	0.105472	0.0973766	0.093091	0.0870593	0.0830022	0.0753778	0.071509	0.0702656	0.0681482	0.0671999	0.0668662	0.0674713	0.0701012	0.0763376	0.0755449	0.0769246	0.0816221	0.0883608	0.0920565	0.0933304	0.0961328	0.0997725	0.100608	0.105127	0.101467	0.105388	0.109663	0.108306	0.109573	0.106989	0.101303	0.0983793	0.0892891	0.0772599	0.0689453	0.0627151	0.0602747
0.119472	0.11858	0.12741	0.130375	0.134422	0.138858	0.14403	0.141478	0.142933	0.131213	0.124118	0.122676	0.111508	0.108522	0.0990253	0.0902575	0.0836248	0.0799897	0.071669	0.071175	0.0670629	0.0661294	0.0697977	0.068537	0.0671665	0.0734897	0.0736811	0.0771348	0.0770866	0.0794716	0.0859982	0.0908555	0.0933304	0.0924643	0.101171	0.100434	0.105299	0.103834	0.102053	0.10604	0.10619	0.106199	0.100671	0.102233	0.0977748	0.0895834	0.0796876	0.0711636	0.0636568	0.0610591
0.125438	0.120082	0.125553	0.131339	0.136098	0.147117	0.142635	0.140437	0.140905	0.136091	0.125976	0.122092	0.113149	0.104963	0.100674	0.0963604	0.0830187	0.0811194	0.074848	0.0691709	0.0693048	0.0678376	0.0665887	0.0689927	0.0697573	0.068869	0.0741499	0.0771348	0.0800031	0.0832763	0.0849856	0.0891397	0.0943731	0.0956087	0.0975001	0.0985238	0.100836	0.101467	0.107055	0.105875	0.104237	0.10652	0.10462	0.101923	0.0955078	0.0882592	0.0799732	0.0731047	0.0651367	0.0618436
0.123648	0.118881	0.130505	0.12748	0.133081	0.141611	0.140195	0.137663	0.135495	0.131213	0.119472	0.118583	0.105491	0.105217	0.0957278	0.0906934	0.0828167	0.0792366	0.0753778	0.071843	0.0689845	0.0693905	0.0656719	0.0668662	0.0662522	0.0714874	0.0732124	0.0753859	0.0812993	0.0824492	0.087517	0.0899976	0.0936779	0.0952594	0.100472	0.101997	0.104784	0.105863	0.106221	0.108675	0.107655	0.107805	0.104778	0.100684	0.0965657	0.0885535	0.0778312	0.0711636	0.0633878	0.0601439
0.114699	0.120683	0.12122	0.126836	0.136768	0.138514	0.142984	0.144945	0.13651	0.129587	0.124118	0.11449	0.104671	0.105726	0.0907816	0.0891677	0.0842309	0.0811194	0.0734351	0.0698389	0.0693048	0.0679929	0.0704089	0.0670181	0.0677761	0.0704092	0.0746187	0.0764988	0.0791929	0.0845997	0.0880233	0.0899976	0.0938517	0.0931631	0.100647	0.10165	0.10444	0.106708	0.107222	0.107687	0.107655	0.105235	0.102409	0.102078	0.0947522	0.0920847	0.0815441	0.0707477	0.066482	0.0605361
0.120367	0.119481	0.123387	0.128123	0.138779	0.13989	0.141589	0.141824	0.134143	0.138367	0.124428	0.117706	0.113696	0.10598	0.0978477	0.0885138	0.0828167	0.0805545	0.0776737	0.072177	0.065942	0.0672164	0.0685752	0.068537	0.0688429	0.0682529	0.0739937	0.0779297	0.0830816	0.0819529	0.0883608	0.0917133	0.096806	0.100675	0.100821	0.103212	0.105299	0.106201	0.107055	0.108675	0.110096	0.107645	0.112043	0.103472	0.0962635	0.0934089	0.0819725	0.0732434	0.0629842	0.0597517
0.124841	0.123086	0.122149	0.126836	0.134422	0.135761	0.142287	0.143211	0.141581	0.135441	0.123808	0.125015	0.112055	0.105472	0.0978477	0.0911293	0.0838268	0.0818725	0.0776737	0.071175	0.0685041	0.0651976	0.0635325	0.0686889	0.065795	0.0682529	0.072431	0.0772938	0.0829196	0.0826146	0.0897109	0.094287	0.0975011	0.0975303	0.101521	0.106164	0.10547	0.108399	0.109556	0.112298	0.110747	0.112143	0.10999	0.104711	0.100193	0.0900248	0.0811157	0.0722728	0.0662129	0.0597517
0.117086	0.117078	0.125244	0.12748	0.139114	0.142988	0.139846	0.140091	0.129072	0.13414	0.122569	0.117121	0.105765	0.104201	0.0978477	0.0906934	0.0856451	0.0818725	0.0759076	0.072177	0.0662622	0.0683035	0.0665887	0.0676257	0.0683857	0.0694851	0.0735249	0.0776117	0.0834056	0.0832763	0.091061	0.094287	0.0995865	0.102771	0.10222	0.107206	0.109075	0.112626	0.111723	0.112628	0.112049	0.112785	0.112043	0.104556	0.0986816	0.092379	0.0816869	0.0731047	0.0625806	0.0602747
0.118279	0.122185	0.126482	0.126193	0.136098	0.139202	0.143681	0.13697	0.133805	0.131538	0.130312	0.120045	0.111234	0.101405	0.0945502	0.0943987	0.0826146	0.0769772	0.0741416	0.072177	0.0705858	0.0687693	0.0659775	0.064436	0.0699097	0.0722575	0.0725873	0.0769758	0.0837297	0.0874119	0.0920736	0.0917133	0.100108	0.10347	0.106415	0.106512	0.106843	0.110428	0.11089	0.113781	0.111561	0.111822	0.107937	0.107189	0.0983793	0.0900248	0.0791164	0.0711636	0.0672892	0.0610591
0.115296	0.122786	0.123077	0.12362	0.130064	0.136449	0.140195	0.138357	0.128057	0.126985	0.126286	0.115951	0.1085	0.0975919	0.0933725	0.0900396	0.0842309	0.0816842	0.0732585	0.071342	0.069625	0.0697011	0.0661303	0.0651955	0.0689953	0.0708713	0.0758689	0.0764988	0.0817854	0.0867502	0.0913985	0.0973754	0.0964584	0.103295	0.106939	0.107901	0.108045	0.108906	0.111557	0.112957	0.116931	0.110054	0.110464	0.108274	0.0992861	0.0920847	0.0789736	0.0704704	0.0650021	0.0606669
0.119472	0.117379	0.115958	0.126515	0.130734	0.141955	0.140195	0.135583	0.131776	0.129912	0.123498	0.118875	0.107132	0.101659	0.0983187	0.0913473	0.0820085	0.0784834	0.0718457	0.0748492	0.0728277	0.0689246	0.0681168	0.0689927	0.0721956	0.0722575	0.0758689	0.0779297	0.0834056	0.0869157	0.0925798	0.0934291	0.100282	0.105391	0.107289	0.105643	0.108045	0.112457	0.117392	0.117404	0.114327	0.113749	0.114255	0.108119	0.101251	0.0926732	0.0819725	0.0740753	0.0651367	0.058052
0.119174	0.117679	0.122768	0.125872	0.128388	0.135417	0.138103	0.137317	0.132115	0.130888	0.119163	0.117706	0.107132	0.0942875	0.0919593	0.08786	0.0826146	0.0784834	0.0729053	0.0731791	0.0697852	0.0693905	0.0655191	0.0691446	0.0708241	0.0733357	0.0786816	0.0804735	0.0840537	0.0854268	0.0951112	0.0961744	0.09837	0.102946	0.105191	0.111895	0.111478	0.112626	0.114391	0.118886	0.119373	0.117444	0.11536	0.108428	0.10246	0.0953217	0.0802588	0.0700544	0.0629842	0.0610591
0.118875	0.121284	0.123387	0.126515	0.138444	0.135417	0.142287	0.137663	0.138876	0.130563	0.12164	0.117121	0.104671	0.103184	0.0943146	0.0856804	0.0805943	0.0766006	0.074848	0.071175	0.0686642	0.0658188	0.0678112	0.0700559	0.0694525	0.0719495	0.0744625	0.0814274	0.0869702	0.0875774	0.0927486	0.0970323	0.1048	0.103295	0.108687	0.112416	0.113194	0.115331	0.115058	0.119545	0.117908	0.119532	0.114729	0.111526	0.104727	0.093556	0.0865423	0.071025	0.0648676	0.0594902
0.117682	0.114675	0.122149	0.124907	0.130734	0.131631	0.140195	0.140437	0.12941	0.133164	0.123189	0.115951	0.111508	0.102421	0.0973766	0.0915653	0.085039	0.0782952	0.0753778	0.072177	0.0702656	0.071254	0.0688808	0.0679295	0.0717384	0.0725656	0.0766502	0.0803145	0.08535	0.0872465	0.09528	0.0977186	0.101324	0.107138	0.108862	0.109464	0.111993	0.114485	0.116392	0.119545	0.118071	0.115195	0.11615	0.111062	0.10246	0.0962045	0.083115	0.0713023	0.0643295	0.058052
0.114699	0.114074	0.120911	0.12555	0.125371	0.134384	0.131478	0.137663	0.132115	0.122433	0.117924	0.117121	0.107406	0.0996254	0.0931369	0.0872061	0.0826146	0.0811194	0.0727287	0.071676	0.0691446	0.0687693	0.068728	0.0692965	0.0686905	0.0727196	0.0802443	0.0807915	0.0872943	0.0897279	0.09528	0.102351	0.102193	0.105741	0.109212	0.113631	0.113022	0.116683	0.118226	0.118063	0.122628	0.119532	0.115202	0.113695	0.103971	0.0956159	0.0839718	0.0740753	0.066482	0.0611899
0.125438	0.11828	0.124625	0.12748	0.136433	0.137826	0.132524	0.139744	0.135495	0.133489	0.124428	0.113028	0.107132	0.101659	0.0961989	0.0861163	0.0809984	0.0764123	0.0736117	0.0695049	0.0661021	0.0690799	0.0702561	0.0694483	0.07311	0.0737978	0.0788379	0.0833353	0.0876183	0.0867502	0.0942674	0.100635	0.103931	0.107313	0.10624	0.111374	0.114567	0.115162	0.117893	0.119545	0.120024	0.116962	0.119625	0.111526	0.101553	0.0944389	0.083115	0.0729661	0.062446	0.0597517
0.118279	0.118881	0.120911	0.123298	0.13241	0.134384	0.134616	0.132115	0.125015	0.126985	0.120401	0.114197	0.109867	0.103184	0.0952568	0.0915653	0.0832207	0.0792366	0.0764375	0.0743482	0.0705858	0.0690799	0.0682696	0.0692965	0.0720432	0.075184	0.0761814	0.0820634	0.0885905	0.0915475	0.0957863	0.101493	0.104974	0.107488	0.111309	0.112242	0.11697	0.118036	0.117059	0.121027	0.121651	0.118087	0.117414	0.115244	0.103367	0.0969401	0.0853998	0.0729661	0.0656748	0.0581828
0.115296	0.114975	0.124625	0.123942	0.127047	0.138514	0.13357	0.135583	0.126705	0.122433	0.119472	0.115659	0.107132	0.0953042	0.0954923	0.087642	0.0816045	0.0773537	0.0691965	0.0746822	0.0702656	0.0697011	0.0681168	0.069904	0.0725004	0.0758001	0.0799317	0.0763398	0.0871322	0.089397	0.0944362	0.0984049	0.104626	0.108536	0.113757	0.117104	0.117313	0.121755	0.122895	0.123662	0.123604	0.120336	0.118045	0.116483	0.107296	0.0973816	0.0851142	0.0769869	0.0651367	0.0613206
0.114103	0.115276	0.124315	0.125872	0.128053	0.134728	0.134616	0.135583	0.1311	0.127311	0.124428	0.118875	0.10932	0.105217	0.093608	0.0869881	0.0834227	0.0781069	0.0704328	0.070507	0.0689845	0.0670611	0.0673528	0.0662587	0.0709764	0.0762621	0.0796192	0.0847662	0.091507	0.0922092	0.0989927	0.104753	0.107928	0.108361	0.113232	0.116931	0.117828	0.120741	0.12056	0.12251	0.124418	0.121942	0.119625	0.115553	0.107145	0.0963516	0.0859711	0.0747685	0.064464	0.0605361
0.110523	0.113774	0.116577	0.12169	0.13107	0.127502	0.133222	0.131422	0.129748	0.130237	0.119782	0.11332	0.108226	0.100896	0.0905461	0.0863342	0.0793822	0.0764123	0.0750246	0.0700059	0.0721872	0.0714093	0.0690337	0.0691446	0.0702145	0.0748759	0.0772752	0.086992	0.0866462	0.0930363	0.0978114	0.101665	0.11123	0.108885	0.112183	0.116931	0.120575	0.121924	0.124062	0.125803	0.121651	0.12644	0.121204	0.113075	0.105936	0.0969401	0.084543	0.0736593	0.0641949	0.0581828
0.115296	0.116177	0.114101	0.124263	0.129394	0.137137	0.134616	0.134196	0.12941	0.125034	0.119472	0.113905	0.108773	0.101659	0.0926659	0.0902575	0.0805943	0.0779186	0.0729053	0.0725111	0.0693048	0.0703223	0.0693393	0.0688408	0.0735672	0.0778024	0.0810256	0.0854021	0.0859981	0.0940289	0.0971364	0.10218	0.105843	0.109234	0.115679	0.11641	0.12109	0.120741	0.126896	0.126133	0.126046	0.124191	0.120573	0.115089	0.107749	0.100324	0.0865423	0.0735207	0.0658093	0.0596209
0.114699	0.116477	0.121839	0.122655	0.13241	0.130943	0.135314	0.129341	0.132115	0.124384	0.116685	0.115951	0.100295	0.101405	0.0945502	0.0869881	0.0785741	0.0766006	0.0736117	0.0691709	0.073148	0.0721858	0.0697977	0.0741569	0.0718908	0.0802668	0.0816506	0.0881049	0.0898867	0.0930363	0.0989927	0.104239	0.112968	0.112029	0.115854	0.118494	0.122806	0.128349	0.126229	0.127945	0.127673	0.126922	0.122468	0.117102	0.107598	0.0982644	0.089684	0.073798	0.066751	0.0594902
0.114998	0.114975	0.122149	0.120404	0.126377	0.136449	0.135314	0.12518	0.127719	0.12666	0.123498	0.117998	0.102756	0.096321	0.0940791	0.0906934	0.0809984	0.0747178	0.071669	0.0733461	0.0733081	0.070167	0.0705617	0.0711191	0.0747864	0.0805748	0.0808693	0.0847662	0.0903728	0.094856	0.100849	0.103381	0.110187	0.116571	0.121797	0.125613	0.124866	0.129194	0.131398	0.132721	0.132718	0.129332	0.127996	0.122214	0.111981	0.0985586	0.0862567	0.0782347	0.0680963	0.0639355
0.11291	0.117379	0.123077	0.121047	0.127718	0.130255	0.136359	0.136276	0.126367	0.119831	0.117614	0.117121	0.104944	0.0960668	0.0921948	0.0893857	0.0809984	0.0777303	0.0721989	0.0736801	0.073148	0.0707881	0.0691865	0.0697521	0.0729576	0.0793426	0.0818069	0.0855611	0.091669	0.0981645	0.104731	0.10767	0.112968	0.115698	0.122846	0.124745	0.124866	0.12987	0.132065	0.131403	0.133532	0.127243	0.127206	0.122988	0.113039	0.102678	0.0862567	0.0767096	0.0695762	0.0645892
0.115296	0.117078	0.119053	0.125228	0.13241	0.138514	0.137405	0.126914	0.132791	0.122433	0.119163	0.110689	0.100842	0.0993712	0.0957278	0.0893857	0.0805943	0.0784834	0.0746714	0.0741811	0.0718669	0.0673717	0.0702561	0.0729418	0.0750912	0.0788805	0.0818069	0.0882639	0.0963678	0.099157	0.102368	0.108185	0.115922	0.117794	0.124944	0.125961	0.127097	0.130885	0.132732	0.133709	0.13223	0.134151	0.129102	0.125776	0.11319	0.100324	0.0909693	0.0780961	0.066482	0.0594902
0.108137	0.109869	0.116887	0.120404	0.130734	0.132664	0.138103	0.13697	0.133805	0.127636	0.114517	0.110689	0.10385	0.100388	0.0912527	0.0858983	0.0814025	0.0771655	0.0734351	0.072177	0.0702656	0.0731175	0.0730067	0.0746125	0.0734148	0.0791886	0.0857135	0.0908077	0.0947475	0.0983299	0.104393	0.109214	0.118355	0.116921	0.122147	0.130128	0.1295	0.131561	0.135733	0.134697	0.138415	0.135275	0.130207	0.124692	0.116213	0.10312	0.0928257	0.0764323	0.066751	0.0622358
0.116191	0.119481	0.118434	0.121047	0.135427	0.138858	0.136011	0.132809	0.128057	0.124384	0.121021	0.112151	0.100021	0.0998796	0.0931369	0.0863342	0.0818065	0.0786717	0.0753778	0.0760182	0.073148	0.0695458	0.0736179	0.0747644	0.0793583	0.0805748	0.0835258	0.0916027	0.0968538	0.102466	0.107262	0.112131	0.118876	0.122336	0.127391	0.125092	0.130186	0.13714	0.138401	0.136509	0.135485	0.135115	0.13384	0.128255	0.113341	0.101943	0.0923973	0.0778188	0.0672892	0.0601439
0.113208	0.112873	0.121839	0.118474	0.129729	0.135761	0.132524	0.133502	0.132791	0.126335	0.119782	0.112735	0.101662	0.100896	0.0954923	0.0843726	0.0814025	0.0766006	0.0732585	0.0731791	0.0689845	0.0700117	0.0723954	0.0737012	0.0785963	0.0807288	0.08837	0.0952594	0.103497	0.105112	0.107768	0.11522	0.124785	0.127751	0.126867	0.13499	0.134134	0.14086	0.142569	0.139309	0.142321	0.140255	0.137789	0.130423	0.119235	0.104885	0.0939682	0.0800372	0.0680963	0.063151
0.113506	0.115276	0.117196	0.126193	0.13174	0.134728	0.132176	0.132462	0.12941	0.129912	0.117924	0.110104	0.104671	0.0981003	0.0947857	0.0867702	0.0814025	0.0781069	0.0741416	0.0753502	0.0723473	0.0703223	0.0734651	0.0735493	0.0785963	0.081807	0.0860261	0.0947824	0.101391	0.104781	0.109625	0.118823	0.124785	0.127577	0.129838	0.133254	0.135851	0.142381	0.144236	0.141285	0.14346	0.143629	0.142843	0.133831	0.121956	0.112242	0.0962531	0.0819783	0.0701143	0.0627588
0.110225	0.109869	0.117196	0.122333	0.122355	0.127502	0.127643	0.129688	0.124677	0.117229	0.116066	0.110689	0.105218	0.0998796	0.0907816	0.0867702	0.0844329	0.0824374	0.0736117	0.0741811	0.0734682	0.0757575	0.0771325	0.0741569	0.0775295	0.0848875	0.0922766	0.0955774	0.101229	0.106105	0.113337	0.120367	0.12687	0.130022	0.134208	0.139853	0.139283	0.144748	0.146404	0.146226	0.148831	0.145235	0.137631	0.132437	0.123467	0.111506	0.0968243	0.0825329	0.0691726	0.0657659
0.115296	0.114675	0.120601	0.11976	0.133751	0.129911	0.126946	0.127607	0.127381	0.123083	0.113898	0.112151	0.102209	0.0988628	0.093608	0.0845906	0.0785741	0.0769772	0.0776737	0.0760182	0.0723473	0.0740493	0.0752988	0.0788654	0.0799679	0.0836553	0.0899327	0.0982801	0.104793	0.106436	0.11435	0.118994	0.127044	0.130896	0.134733	0.138811	0.140485	0.14982	0.148905	0.145896	0.147854	0.145878	0.145844	0.135844	0.125432	0.111359	0.0991092	0.0829488	0.070787	0.0644584
0.114699	0.117679	0.112244	0.11976	0.127718	0.131975	0.13357	0.124486	0.120619	0.124709	0.118543	0.110981	0.101936	0.0955584	0.0959634	0.092873	0.085241	0.0782952	0.0785567	0.0781894	0.0790729	0.0756022	0.0757572	0.0768908	0.0814918	0.0876599	0.0908703	0.0982801	0.108034	0.111398	0.116375	0.120024	0.127739	0.133866	0.139627	0.141936	0.144089	0.148806	0.153573	0.155119	0.151435	0.150697	0.149634	0.141575	0.12921	0.113861	0.0988236	0.084058	0.0729395	0.0630203
0.114699	0.114975	0.119363	0.115901	0.127383	0.133008	0.136708	0.120325	0.12231	0.12601	0.118543	0.115367	0.105218	0.100896	0.100674	0.0941808	0.0828167	0.0807428	0.07891	0.0755172	0.0757101	0.0734281	0.075146	0.0796248	0.083473	0.087968	0.0946206	0.100506	0.108682	0.115534	0.120594	0.12397	0.132083	0.139805	0.143123	0.145062	0.149239	0.154554	0.157242	0.157754	0.155992	0.15632	0.153583	0.143744	0.130872	0.114302	0.0988236	0.0847512	0.075361	0.0644584
0.113506	0.105663	0.111625	0.11783	0.128053	0.126813	0.126946	0.128648	0.124677	0.119181	0.118853	0.110689	0.104944	0.0970835	0.0933725	0.0863342	0.085039	0.0786717	0.07891	0.0790244	0.0753898	0.0777763	0.0774381	0.0797767	0.0863685	0.0858116	0.093058	0.099552	0.109006	0.113383	0.120763	0.128774	0.136602	0.13998	0.142074	0.148535	0.150955	0.158274	0.161076	0.158413	0.162013	0.156962	0.155478	0.14901	0.132837	0.120187	0.101822	0.0866923	0.0719977	0.0683807
0.114103	0.112272	0.115339	0.122655	0.122355	0.130599	0.13357	0.126567	0.123324	0.123733	0.113278	0.11332	0.107132	0.0937791	0.0891328	0.0885138	0.0866552	0.0807428	0.0785567	0.0786904	0.0790729	0.0780869	0.0782022	0.0808399	0.0808822	0.0896622	0.096027	0.101778	0.107386	0.115203	0.123969	0.128259	0.135733	0.139106	0.142774	0.150098	0.154044	0.156245	0.160576	0.165001	0.16478	0.160496	0.158163	0.148545	0.139185	0.123866	0.104393	0.0880788	0.0754955	0.0689037
0.112313	0.106264	0.115339	0.113971	0.126712	0.134728	0.126946	0.128994	0.131438	0.125685	0.120401	0.110689	0.100568	0.100642	0.0945502	0.087424	0.0858471	0.0792366	0.0780269	0.0813625	0.077952	0.0771551	0.0792718	0.0831182	0.0857589	0.0928967	0.100246	0.103368	0.115325	0.118015	0.123463	0.132549	0.139904	0.144172	0.146794	0.15496	0.155933	0.163346	0.165245	0.165331	0.167221	0.167404	0.160375	0.154276	0.139638	0.124307	0.106107	0.0905745	0.0750919	0.068773
0.115296	0.109568	0.111625	0.120404	0.12336	0.134728	0.127643	0.126914	0.125691	0.119831	0.117304	0.105718	0.106859	0.0978461	0.0910171	0.0891677	0.0820085	0.080178	0.0796164	0.0801935	0.0774716	0.0794845	0.0785078	0.0815993	0.0877401	0.0916645	0.0999336	0.106865	0.114677	0.120166	0.128357	0.134608	0.142858	0.15081	0.15029	0.15305	0.161597	0.163853	0.167412	0.167472	0.169012	0.165476	0.164797	0.154276	0.139033	0.12725	0.10882	0.0920996	0.0772444	0.0694267
0.110821	0.115276	0.116887	0.120725	0.130064	0.129222	0.131827	0.128648	0.130086	0.120481	0.112969	0.111273	0.10385	0.10293	0.0891328	0.0889498	0.0870593	0.0854499	0.079793	0.0796924	0.0814749	0.0794845	0.082328	0.0835739	0.0904832	0.0970554	0.102278	0.113225	0.118727	0.123971	0.13207	0.140956	0.147029	0.150985	0.160254	0.161733	0.169149	0.171461	0.175082	0.176859	0.177149	0.178167	0.171115	0.162331	0.149159	0.132547	0.112961	0.0920996	0.0780516	0.0706034
0.105452	0.115276	0.114411	0.123298	0.123025	0.127502	0.134965	0.130381	0.125353	0.11853	0.114517	0.107765	0.105765	0.0993712	0.0917237	0.0935269	0.0866552	0.0843202	0.0829719	0.0798594	0.0814749	0.0838327	0.0852314	0.0815993	0.0910928	0.0999818	0.10634	0.113066	0.120348	0.129926	0.135276	0.143873	0.15033	0.154304	0.1634	0.164337	0.173955	0.175349	0.178917	0.181141	0.181706	0.180737	0.173168	0.165119	0.151728	0.136372	0.114389	0.094734	0.0845091	0.0715186
0.118875	0.109869	0.117815	0.122012	0.126377	0.131631	0.128689	0.124486	0.121972	0.126335	0.115136	0.110104	0.106038	0.0958126	0.0969055	0.0889498	0.0842309	0.0852616	0.0824421	0.0826986	0.080354	0.081348	0.0837033	0.0890418	0.0920072	0.0981335	0.107122	0.112907	0.126991	0.129595	0.136964	0.142329	0.155891	0.160418	0.163225	0.169547	0.173097	0.180252	0.185753	0.183118	0.183822	0.182344	0.179328	0.166358	0.150217	0.133871	0.113104	0.097091	0.0789933	0.0709956
0.108435	0.115276	0.114411	0.113971	0.125371	0.133008	0.136011	0.130728	0.120958	0.123083	0.116995	0.112735	0.102209	0.0996254	0.0945502	0.0911293	0.085039	0.0841319	0.0835018	0.0831996	0.0843573	0.0835221	0.0859954	0.0887381	0.0962743	0.105219	0.106809	0.114179	0.125857	0.131249	0.139326	0.145074	0.157108	0.16234	0.171616	0.174062	0.178246	0.186339	0.185586	0.18987	0.18903	0.185235	0.181223	0.173328	0.15596	0.136225	0.118531	0.0986161	0.08424	0.0745257
0.11112	0.111971	0.117815	0.11976	0.121684	0.13232	0.129038	0.128648	0.126367	0.12666	0.115446	0.114782	0.102756	0.099117	0.0976121	0.0900396	0.0874633	0.0852616	0.0842082	0.0840346	0.0841972	0.0841433	0.0858426	0.0894975	0.0936835	0.10337	0.112279	0.121015	0.13412	0.137205	0.144727	0.154854	0.161105	0.166882	0.170567	0.178229	0.181679	0.188706	0.193423	0.192011	0.192285	0.191661	0.188331	0.178904	0.162307	0.140933	0.122244	0.102637	0.0834329	0.0747872
0.109032	0.106564	0.116577	0.119117	0.122355	0.123716	0.128689	0.122059	0.126367	0.120481	0.108633	0.111858	0.104397	0.0996254	0.0950212	0.0902575	0.0904937	0.0929812	0.0900363	0.0872078	0.0865992	0.0891126	0.0918022	0.095573	0.0985602	0.106759	0.114779	0.127057	0.13655	0.141506	0.154852	0.161031	0.171532	0.177712	0.182628	0.188475	0.193865	0.199695	0.201426	0.204528	0.202864	0.204673	0.197176	0.182312	0.17062	0.15035	0.126242	0.104162	0.0853163	0.0777943
0.112313	0.112873	0.115339	0.113649	0.124031	0.130255	0.129386	0.12414	0.124677	0.123408	0.114827	0.115367	0.104397	0.101659	0.0964344	0.0906934	0.0892816	0.0882741	0.0857977	0.0862058	0.0862789	0.087715	0.0901213	0.0967881	0.100694	0.108761	0.118529	0.126898	0.139791	0.146137	0.152321	0.160859	0.171184	0.180158	0.186648	0.191601	0.19541	0.203245	0.206761	0.20914	0.208397	0.206601	0.203336	0.191915	0.1747	0.153587	0.129098	0.107767	0.088545	0.0776635
0.110821	0.115276	0.115339	0.115257	0.125707	0.130255	0.129735	0.12518	0.120281	0.119506	0.116685	0.110104	0.100295	0.0981003	0.0943146	0.0939628	0.0862511	0.0835671	0.0873871	0.0898799	0.0904424	0.0901997	0.0922606	0.0966362	0.106028	0.111996	0.119779	0.132304	0.142059	0.148288	0.158228	0.163604	0.173617	0.18732	0.191718	0.194553	0.201074	0.206796	0.215431	0.214575	0.210187	0.210135	0.208706	0.197026	0.176967	0.157413	0.131098	0.108322	0.0917738	0.077402
0.108435	0.106564	0.109459	0.115579	0.124031	0.124749	0.131827	0.123446	0.119267	0.12601	0.118543	0.108934	0.105765	0.100896	0.0983187	0.0957065	0.0890795	0.0878976	0.0888	0.0888779	0.0894816	0.0926843	0.0928718	0.0986108	0.10679	0.113998	0.124311	0.134529	0.14692	0.152258	0.159746	0.170811	0.179352	0.187495	0.195039	0.199936	0.20588	0.210008	0.216599	0.218363	0.217674	0.217685	0.213128	0.200434	0.180897	0.160797	0.133811	0.11151	0.0919083	0.0797554
0.104856	0.113473	0.111625	0.114614	0.121684	0.131631	0.126249	0.128994	0.124677	0.117555	0.116995	0.109811	0.101662	0.101659	0.0973766	0.0937449	0.0904937	0.0903453	0.0891532	0.0893789	0.0901221	0.0926843	0.0968448	0.101041	0.108466	0.117232	0.127124	0.138027	0.150647	0.15689	0.163965	0.175615	0.187867	0.192386	0.199933	0.20393	0.211372	0.22049	0.226102	0.225445	0.225649	0.222986	0.218025	0.208333	0.186639	0.163739	0.13938	0.114699	0.0936572	0.0815858
0.108137	0.107766	0.115339	0.120404	0.117997	0.127502	0.126597	0.129688	0.126029	0.121457	0.113898	0.115367	0.107132	0.0983545	0.104207	0.0994118	0.0961505	0.0931695	0.0907427	0.0932201	0.097168	0.10076	0.099137	0.105749	0.112581	0.124626	0.133999	0.144546	0.157938	0.167312	0.177635	0.185223	0.193254	0.204789	0.209373	0.217127	0.222529	0.230634	0.23644	0.234832	0.235088	0.231982	0.231608	0.216388	0.196614	0.173156	0.142522	0.1208	0.0975586	0.0839392
0.104557	0.110469	0.113792	0.118795	0.121014	0.124749	0.128689	0.125527	0.129072	0.113977	0.112039	0.10835	0.105765	0.101913	0.0931369	0.0961424	0.0953424	0.0952406	0.0932152	0.0940552	0.0974882	0.101691	0.106472	0.107572	0.118524	0.128014	0.13775	0.151064	0.158262	0.171116	0.180504	0.192086	0.203507	0.20741	0.218812	0.224941	0.232827	0.235706	0.242442	0.241749	0.245179	0.241139	0.237452	0.224597	0.202962	0.176687	0.15109	0.122186	0.102402	0.0902149
0.107242	0.11077	0.111625	0.113327	0.122355	0.129911	0.125551	0.122753	0.126029	0.120807	0.119163	0.110689	0.103303	0.0993712	0.0990253	0.0978861	0.0937262	0.0937343	0.0956877	0.0968943	0.0970078	0.101691	0.10311	0.107724	0.121725	0.127398	0.139312	0.152495	0.163771	0.176575	0.184892	0.193802	0.207852	0.21859	0.224755	0.231019	0.236088	0.243483	0.254114	0.253113	0.251852	0.252866	0.244717	0.233581	0.211425	0.182867	0.154375	0.12801	0.104151	0.0898227
0.108733	0.106864	0.110078	0.116222	0.121014	0.130943	0.132524	0.122406	0.122986	0.119831	0.117924	0.111273	0.103303	0.100388	0.101145	0.098104	0.0910998	0.0958055	0.0985134	0.0999004	0.103573	0.103244	0.108153	0.114711	0.122334	0.131403	0.144	0.157424	0.170576	0.181207	0.188773	0.200322	0.215672	0.222083	0.229649	0.235881	0.244327	0.254303	0.261116	0.258219	0.255269	0.260577	0.250246	0.237143	0.212936	0.185221	0.160087	0.13106	0.10563	0.0911301
0.106645	0.105362	0.109149	0.116544	0.121014	0.130255	0.122762	0.120325	0.121972	0.120481	0.115136	0.110689	0.103303	0.101405	0.0983187	0.0967963	0.0939282	0.100136	0.0967474	0.100568	0.106456	0.106195	0.110598	0.117141	0.125382	0.134021	0.147438	0.162193	0.175437	0.185839	0.195355	0.207528	0.22019	0.227673	0.236816	0.242654	0.251364	0.263264	0.267619	0.26843	0.268127	0.267324	0.260196	0.247366	0.219888	0.19449	0.165228	0.133833	0.108994	0.0943987
0.107242	0.110469	0.112244	0.112041	0.120344	0.126813	0.132524	0.12518	0.119605	0.116579	0.114827	0.113905	0.104397	0.100642	0.102558	0.103771	0.102009	0.100324	0.101163	0.104076	0.11126	0.113494	0.115182	0.122305	0.133002	0.144033	0.157439	0.171573	0.184672	0.19808	0.209193	0.218166	0.232355	0.243395	0.254996	0.258456	0.266812	0.278649	0.285293	0.288688	0.283913	0.283549	0.278044	0.260687	0.236513	0.206261	0.17294	0.140488	0.116393	0.100805
0.103364	0.107465	0.110078	0.115257	0.120008	0.125437	0.122762	0.127261	0.121972	0.115929	0.114827	0.109227	0.108773	0.102421	0.101852	0.104207	0.102009	0.107291	0.102222	0.107583	0.113181	0.11691	0.121905	0.126254	0.137574	0.148807	0.164627	0.176502	0.192125	0.204532	0.216281	0.232236	0.241218	0.249859	0.260065	0.270959	0.275566	0.286426	0.295797	0.29297	0.297259	0.291581	0.286731	0.270445	0.244069	0.214059	0.17908	0.146311	0.11868	0.102766
0.11112	0.110469	0.108221	0.108181	0.121014	0.121996	0.130432	0.120672	0.120619	0.121457	0.116685	0.114782	0.107679	0.107251	0.10562	0.10704	0.103424	0.0993828	0.10805	0.110589	0.113341	0.118618	0.121294	0.130203	0.140469	0.155892	0.16494	0.18318	0.198445	0.206517	0.223875	0.230177	0.248169	0.255798	0.26898	0.274085	0.283976	0.295725	0.302633	0.305981	0.2997	0.298328	0.294944	0.27695	0.250719	0.217591	0.184221	0.148252	0.121909	0.104466
0.106049	0.108667	0.113482	0.113006	0.121684	0.128878	0.127643	0.12622	0.119605	0.11853	0.110801	0.112443	0.106038	0.102676	0.103501	0.105079	0.107868	0.105973	0.108403	0.110923	0.116544	0.124519	0.125879	0.131115	0.145803	0.158357	0.174784	0.189539	0.202009	0.218262	0.231132	0.24253	0.255815	0.265057	0.275098	0.283114	0.290842	0.303671	0.31347	0.312733	0.309791	0.307806	0.303157	0.28454	0.257369	0.22583	0.189219	0.153244	0.123792	0.107342
0.103662	0.104461	0.112863	0.112041	0.110288	0.12406	0.123459	0.122406	0.123662	0.118855	0.112659	0.115659	0.109593	0.10293	0.106562	0.108566	0.106656	0.110115	0.10858	0.114263	0.12311	0.125296	0.128782	0.13476	0.145956	0.159897	0.175253	0.189857	0.20849	0.219255	0.233832	0.244246	0.257727	0.268201	0.279468	0.289887	0.298909	0.306376	0.314304	0.31718	0.315813	0.314232	0.307896	0.290891	0.264623	0.234953	0.194646	0.155601	0.126079	0.111003
0.10754	0.111371	0.109459	0.112041	0.118668	0.126813	0.132176	0.12622	0.121972	0.119831	0.120401	0.115951	0.106585	0.108013	0.111509	0.113797	0.110495	0.111433	0.116527	0.12395	0.128554	0.13275	0.137492	0.142962	0.159367	0.176994	0.190255	0.207505	0.228906	0.240429	0.254083	0.265179	0.283272	0.294754	0.304814	0.310204	0.320192	0.33461	0.345483	0.345508	0.34169	0.341862	0.332377	0.316293	0.283816	0.248636	0.208498	0.169466	0.137514	0.118194
0.100381	0.106864	0.111006	0.109146	0.116992	0.128534	0.130432	0.124833	0.115886	0.120156	0.117924	0.116536	0.106859	0.10598	0.109153	0.116195	0.114131	0.116893	0.119883	0.12562	0.133678	0.141757	0.14284	0.151316	0.164853	0.18146	0.196349	0.215136	0.232146	0.249362	0.261509	0.27616	0.292483	0.303488	0.315826	0.325485	0.332722	0.345768	0.357488	0.356048	0.35471	0.351661	0.343749	0.324657	0.294849	0.254963	0.214496	0.174457	0.138321	0.121593
0.105154	0.108667	0.106673	0.108181	0.119338	0.127502	0.13113	0.121712	0.124338	0.122433	0.123498	0.119752	0.112875	0.117164	0.121872	0.118156	0.117768	0.121035	0.124122	0.131298	0.138162	0.136943	0.145438	0.152075	0.167596	0.186235	0.201818	0.219747	0.241382	0.257468	0.271128	0.284567	0.30291	0.316241	0.328412	0.33382	0.344565	0.359294	0.369826	0.367907	0.364963	0.364352	0.359702	0.337668	0.302859	0.26335	0.224921	0.180142	0.143299	0.122509
0.102171	0.0969511	0.107292	0.110111	0.120344	0.121651	0.1259	0.130035	0.128734	0.128937	0.12164	0.124431	0.115884	0.115639	0.119988	0.115323	0.11999	0.120659	0.126594	0.131465	0.136241	0.145173	0.151245	0.163619	0.175063	0.192088	0.212288	0.234056	0.251427	0.263919	0.282773	0.292974	0.311251	0.324276	0.332607	0.347018	0.358983	0.373157	0.379997	0.379435	0.377007	0.378489	0.3706	0.345567	0.315705	0.277033	0.232204	0.18444	0.14599	0.126954
0.108733	0.110469	0.106982	0.110754	0.121684	0.127502	0.129038	0.126567	0.119605	0.118205	0.122879	0.117413	0.108226	0.112589	0.119517	0.122297	0.11999	0.121412	0.125711	0.137978	0.142966	0.147813	0.155218	0.163922	0.17933	0.201175	0.216976	0.237712	0.260339	0.27401	0.290029	0.306014	0.323416	0.33633	0.350262	0.358305	0.367565	0.38347	0.394169	0.391952	0.38726	0.387967	0.381498	0.359352	0.324773	0.284096	0.236631	0.190263	0.151236	0.130092
0.10754	0.099054	0.111625	0.115257	0.122355	0.123372	0.121367	0.12622	0.127381	0.129587	0.120401	0.12063	0.11561	0.120723	0.128467	0.125131	0.127869	0.133462	0.140723	0.14683	0.152574	0.162566	0.167748	0.179111	0.192589	0.212419	0.234321	0.258858	0.279134	0.293034	0.310618	0.328662	0.346702	0.358515	0.366169	0.382616	0.3964	0.410859	0.418679	0.418633	0.418671	0.416079	0.408665	0.379953	0.347442	0.304694	0.253625	0.204128	0.160788	0.141597
0.109032	0.107465	0.111625	0.119117	0.125371	0.125781	0.124854	0.127954	0.123662	0.116579	0.120401	0.118291	0.118892	0.117672	0.124934	0.127093	0.129081	0.137604	0.139663	0.148834	0.156417	0.167225	0.172791	0.181845	0.197618	0.220428	0.246041	0.263627	0.285615	0.302794	0.317537	0.3393	0.355565	0.368822	0.380852	0.389215	0.405669	0.420496	0.430184	0.428515	0.430226	0.425718	0.416404	0.393429	0.356359	0.311757	0.25848	0.207871	0.16442	0.142381
0.103066	0.105663	0.113173	0.114292	0.123695	0.12819	0.131478	0.127954	0.129748	0.123083	0.119163	0.12063	0.115884	0.123773	0.127054	0.13058	0.13393	0.140993	0.146021	0.152341	0.160901	0.169088	0.178139	0.186402	0.203409	0.227206	0.250417	0.273962	0.29485	0.313381	0.331038	0.348222	0.371379	0.382273	0.391515	0.40467	0.419743	0.435881	0.444856	0.444325	0.442595	0.440818	0.431567	0.407988	0.368903	0.321173	0.267905	0.215913	0.17034	0.14735
0.105154	0.109268	0.106054	0.112041	0.121684	0.129566	0.123459	0.121712	0.129072	0.124059	0.12226	0.117998	0.116704	0.121994	0.127525	0.13276	0.13393	0.14024	0.146021	0.157017	0.165385	0.174058	0.183335	0.192629	0.2092	0.231518	0.255417	0.281116	0.3036	0.321817	0.338464	0.361605	0.381285	0.393453	0.407422	0.417173	0.434676	0.447715	0.459028	0.456842	0.451872	0.451581	0.443728	0.418831	0.375855	0.333238	0.280187	0.222984	0.178412	0.151534
0.105452	0.10326	0.111006	0.117509	0.120344	0.125437	0.127294	0.125873	0.126705	0.125034	0.116995	0.11946	0.117251	0.121739	0.133885	0.137337	0.139587	0.147395	0.153968	0.165201	0.172751	0.185549	0.188836	0.200375	0.218039	0.245534	0.268699	0.291609	0.319478	0.336375	0.355171	0.376361	0.394144	0.409175	0.424727	0.434538	0.448922	0.467158	0.477369	0.474629	0.472867	0.470376	0.458575	0.433236	0.390968	0.341919	0.28747	0.230887	0.184466	0.158332
0.107242	0.108066	0.104506	0.110111	0.118332	0.127846	0.131478	0.124833	0.128734	0.127961	0.125047	0.123553	0.123815	0.129873	0.139773	0.146273	0.148274	0.158692	0.167214	0.17472	0.188124	0.194867	0.204117	0.217691	0.237698	0.264479	0.289795	0.317524	0.34281	0.362015	0.379304	0.400382	0.422471	0.437649	0.451471	0.464753	0.481019	0.500295	0.512216	0.513004	0.507533	0.506039	0.493481	0.465608	0.418625	0.367374	0.311033	0.247248	0.196708	0.168922
0.100978	0.10326	0.108221	0.106895	0.116992	0.119931	0.132176	0.127954	0.120619	0.125034	0.124428	0.126477	0.119166	0.128348	0.139537	0.149978	0.155345	0.159822	0.173042	0.185409	0.197251	0.207601	0.213285	0.227411	0.250652	0.277725	0.30339	0.329766	0.359175	0.379881	0.401917	0.420628	0.444193	0.46001	0.476992	0.487501	0.503847	0.522105	0.531724	0.536555	0.530318	0.526923	0.516857	0.485899	0.440992	0.38709	0.323599	0.258062	0.20747	0.177813
0.0941169	0.0996548	0.107292	0.115901	0.12269	0.123372	0.127643	0.127261	0.131438	0.126985	0.119782	0.129693	0.126003	0.138516	0.142599	0.15303	0.161002	0.171119	0.179223	0.187079	0.200934	0.211483	0.22062	0.23212	0.253243	0.284348	0.311516	0.340259	0.36841	0.387656	0.412887	0.433325	0.458965	0.472063	0.487131	0.49983	0.519295	0.538335	0.545063	0.546437	0.542361	0.540417	0.526808	0.497361	0.450211	0.395476	0.331739	0.263054	0.208547	0.178597
0.103364	0.100256	0.10234	0.111398	0.121014	0.128878	0.126946	0.12622	0.128396	0.129912	0.127525	0.127354	0.13202	0.135974	0.152492	0.159569	0.159991	0.176767	0.184168	0.198435	0.208621	0.219713	0.229177	0.243815	0.267416	0.295284	0.32683	0.356476	0.384937	0.408665	0.428581	0.453571	0.477907	0.495471	0.508457	0.523794	0.541436	0.558792	0.574908	0.571141	0.567425	0.562746	0.550973	0.51982	0.466835	0.41225	0.34502	0.276919	0.219847	0.187619
0.105154	0.106564	0.111625	0.106895	0.115986	0.121996	0.130781	0.127954	0.123662	0.125034	0.128144	0.13174	0.129832	0.136736	0.153434	0.166107	0.169689	0.178273	0.18929	0.204782	0.218229	0.231205	0.236054	0.252169	0.27656	0.307298	0.337143	0.368877	0.397575	0.424711	0.448495	0.470729	0.493547	0.511368	0.528034	0.544632	0.556884	0.579587	0.594249	0.593211	0.586792	0.582987	0.570243	0.538717	0.489203	0.425786	0.357587	0.283435	0.226305	0.196509
0.100381	0.101758	0.113792	0.115257	0.124701	0.12234	0.130432	0.128648	0.13651	0.131538	0.129073	0.137588	0.135302	0.145124	0.160029	0.171338	0.180194	0.19183	0.204655	0.217474	0.23152	0.24953	0.259739	0.27556	0.299419	0.333482	0.366521	0.400039	0.429981	0.453991	0.481403	0.505388	0.531257	0.546131	0.562645	0.57971	0.600995	0.616782	0.628596	0.627138	0.62276	0.619935	0.60578	0.569075	0.516104	0.454477	0.382721	0.30451	0.242718	0.210107
0.101574	0.102959	0.10203	0.11976	0.121684	0.129566	0.130432	0.132115	0.136172	0.129587	0.130002	0.134079	0.144327	0.150462	0.165917	0.178095	0.186861	0.203315	0.214545	0.227161	0.242569	0.260245	0.271352	0.284217	0.30963	0.343494	0.381366	0.416256	0.444887	0.475165	0.499292	0.52632	0.55159	0.568841	0.585019	0.60159	0.624167	0.642818	0.65644	0.652007	0.645708	0.643871	0.628524	0.592929	0.536355	0.473311	0.397001	0.316988	0.252135	0.216121
0.102469	0.105062	0.109459	0.116222	0.123695	0.131287	0.132873	0.13697	0.139553	0.139343	0.139603	0.144605	0.147609	0.157834	0.174161	0.189211	0.194134	0.213294	0.223022	0.239186	0.25506	0.270649	0.281132	0.294546	0.324717	0.360128	0.398712	0.435016	0.467409	0.497167	0.522243	0.551714	0.574007	0.596616	0.610715	0.629895	0.651973	0.668685	0.682951	0.678688	0.671911	0.669574	0.6519	0.617402	0.55842	0.492585	0.414709	0.331546	0.265722	0.227626
0.101574	0.105062	0.112244	0.110111	0.119003	0.127158	0.127294	0.140091	0.132115	0.132839	0.140532	0.140512	0.147882	0.153004	0.176988	0.191173	0.203832	0.215553	0.230616	0.248872	0.266909	0.285091	0.293051	0.308671	0.339652	0.377841	0.417151	0.450915	0.489282	0.512717	0.542663	0.570416	0.59851	0.618976	0.635187	0.653685	0.673084	0.698103	0.708961	0.706027	0.700717	0.694634	0.679857	0.641719	0.582904	0.512743	0.431846	0.34652	0.277157	0.237955
0.103364	0.102959	0.107292	0.113971	0.123695	0.126125	0.139149	0.136276	0.133467	0.13479	0.145487	0.14402	0.145147	0.159359	0.180285	0.199673	0.211509	0.223649	0.242802	0.261565	0.27988	0.297049	0.307568	0.322189	0.354587	0.392627	0.429808	0.470311	0.507591	0.53356	0.56359	0.589118	0.61919	0.641861	0.659309	0.677649	0.698487	0.723632	0.736139	0.732873	0.722689	0.717124	0.702127	0.663714	0.599377	0.527015	0.444984	0.357612	0.286036	0.248022
0.102767	0.104461	0.112863	0.108503	0.124701	0.136793	0.134616	0.135583	0.137862	0.139343	0.148584	0.155423	0.151438	0.171305	0.20007	0.222341	0.23353	0.250386	0.268234	0.289121	0.308864	0.325002	0.334615	0.352263	0.387199	0.431133	0.473563	0.516259	0.560088	0.590466	0.621981	0.64917	0.685053	0.708242	0.723811	0.743289	0.76474	0.791258	0.805	0.800398	0.786487	0.782666	0.766568	0.722573	0.657562	0.576599	0.488683	0.3938	0.314019	0.271033
0.10575	0.104461	0.111006	0.111398	0.124366	0.133696	0.137405	0.141824	0.1382	0.147148	0.155708	0.15747	0.157454	0.179694	0.20431	0.228444	0.240399	0.256976	0.277594	0.304653	0.323917	0.341152	0.352035	0.371401	0.40823	0.454853	0.494658	0.539471	0.58666	0.618919	0.646957	0.678681	0.710599	0.733048	0.752653	0.771767	0.792203	0.818647	0.834678	0.832349	0.8192	0.813028	0.799105	0.75479	0.684614	0.601906	0.508961	0.410022	0.327203	0.283584
0.106347	0.0999552	0.112244	0.117187	0.128053	0.131975	0.136011	0.140437	0.141919	0.147473	0.150133	0.16244	0.1673	0.184777	0.212082	0.237162	0.249894	0.271097	0.295784	0.314339	0.330322	0.357458	0.367928	0.388412	0.424232	0.472874	0.519192	0.569838	0.60902	0.641582	0.678684	0.709565	0.741532	0.766414	0.781845	0.803025	0.827732	0.855166	0.867524	0.862159	0.853866	0.847566	0.832274	0.780037	0.711365	0.629715	0.531953	0.428739	0.340387	0.295743
0.106347	0.104161	0.112863	0.115901	0.121014	0.13232	0.140543	0.142171	0.149357	0.151375	0.156946	0.166534	0.174411	0.195199	0.223859	0.252855	0.265248	0.287101	0.310619	0.333545	0.353221	0.375627	0.387334	0.406791	0.447853	0.496131	0.545913	0.596548	0.641425	0.673674	0.709736	0.741136	0.775245	0.801701	0.819252	0.841575	0.867038	0.8905	0.90704	0.900863	0.888043	0.882747	0.86481	0.813649	0.739324	0.652962	0.551231	0.447457	0.358952	0.309472
0.103662	0.102058	0.109149	0.122655	0.133081	0.138858	0.139497	0.146332	0.146991	0.153977	0.159424	0.168288	0.173043	0.200791	0.233987	0.257214	0.27838	0.303105	0.328104	0.351749	0.369395	0.392554	0.408728	0.428207	0.468274	0.51754	0.57154	0.621986	0.672696	0.705601	0.740788	0.779226	0.815041	0.838036	0.858932	0.879431	0.909776	0.937501	0.950391	0.941872	0.927591	0.922747	0.903507	0.850358	0.773026	0.683419	0.582077	0.471027	0.376441	0.323069
0.107242	0.106864	0.115339	0.119117	0.132075	0.141955	0.140543	0.153267	0.1595	0.16666	0.172122	0.176182	0.189726	0.213754	0.254714	0.28119	0.301815	0.329464	0.35795	0.389326	0.410069	0.436346	0.45075	0.473469	0.517346	0.572835	0.630296	0.683991	0.738317	0.774583	0.812511	0.850602	0.888724	0.91717	0.936893	0.958963	0.983066	1.01679	1.03359	1.01944	1.00441	0.997928	0.98011	0.923467	0.836652	0.744186	0.633773	0.515672	0.412226	0.35497
0.106944	0.108066	0.119673	0.126836	0.134422	0.141611	0.154141	0.161936	0.158486	0.169261	0.17367	0.184954	0.197658	0.223922	0.26602	0.30146	0.32222	0.34528	0.37879	0.406027	0.433928	0.459485	0.473366	0.498075	0.544016	0.603178	0.660299	0.71547	0.770074	0.812795	0.851495	0.88732	0.927477	0.95665	0.977272	1.00272	1.02941	1.06007	1.07527	1.0649	1.05031	1.04066	1.02244	0.96219	0.873376	0.776997	0.65905	0.535499	0.431733	0.373536
0.104259	0.110469	0.120601	0.126836	0.135762	0.149182	0.15693	0.173033	0.165924	0.171212	0.185129	0.196942	0.205315	0.234852	0.280623	0.314319	0.33818	0.367498	0.395038	0.427237	0.456988	0.483555	0.498426	0.519947	0.571904	0.636139	0.696865	0.754899	0.807665	0.854813	0.89031	0.929871	0.97266	0.999623	1.02289	1.04561	1.07352	1.10572	1.12463	1.11101	1.09571	1.08725	1.0624	1.00448	0.913577	0.811132	0.690181	0.562674	0.453124	0.392624
0.105154	0.110469	0.112244	0.122333	0.135427	0.14815	0.158325	0.165751	0.167276	0.17609	0.183271	0.198988	0.212153	0.244256	0.290987	0.335244	0.357171	0.382748	0.419057	0.451453	0.478606	0.506228	0.517986	0.543642	0.594459	0.659396	0.719679	0.783199	0.840718	0.883101	0.925074	0.967961	1.00846	1.04015	1.06135	1.0833	1.11592	1.14613	1.16081	1.15153	1.13298	1.12243	1.10125	1.03824	0.94607	0.839676	0.7166	0.58361	0.471555	0.407398
0.10575	0.108667	0.11472	0.131983	0.141461	0.151247	0.163903	0.167485	0.175728	0.185521	0.186678	0.209806	0.22446	0.252899	0.306768	0.344616	0.371919	0.405719	0.442016	0.470158	0.504547	0.532627	0.547478	0.575842	0.626157	0.693744	0.757339	0.825967	0.883493	0.925614	0.968614	1.0112	1.05712	1.084	1.10872	1.13574	1.16552	1.19736	1.213	1.20275	1.18246	1.17447	1.15085	1.0827	0.988387	0.877931	0.750731	0.609953	0.492676	0.427794
0.11112	0.111971	0.120292	0.128766	0.146153	0.159162	0.167041	0.183089	0.190943	0.201131	0.214861	0.227934	0.243057	0.286451	0.344454	0.391041	0.420002	0.457873	0.500296	0.536795	0.56764	0.598161	0.616242	0.644495	0.707232	0.779843	0.85016	0.923744	0.989296	1.04009	1.08168	1.12942	1.18015	1.21152	1.23563	1.2592	1.29768	1.33159	1.35005	1.3299	1.30892	1.29624	1.26789	1.20103	1.09236	0.972392	0.835414	0.684685	0.555098	0.480222
0.107839	0.109268	0.120601	0.133591	0.146153	0.159506	0.172619	0.187597	0.193985	0.206984	0.216719	0.239337	0.255911	0.295602	0.357408	0.411093	0.440003	0.481785	0.522725	0.561846	0.597585	0.632636	0.649554	0.674721	0.738931	0.815423	0.890008	0.966353	1.02964	1.08293	1.1313	1.17557	1.22742	1.25816	1.28317	1.31286	1.35141	1.38181	1.39774	1.38079	1.35742	1.34652	1.3159	1.2413	1.13513	1.0105	0.867546	0.70881	0.575413	0.500749
0.114103	0.118881	0.122458	0.128123	0.151852	0.166045	0.180638	0.190371	0.196352	0.211862	0.229417	0.24577	0.260287	0.308819	0.381668	0.432453	0.464448	0.505321	0.547274	0.59007	0.630412	0.65888	0.676296	0.705706	0.772458	0.853775	0.930012	1.00705	1.07955	1.13339	1.17855	1.22653	1.2799	1.31389	1.33666	1.36287	1.39672	1.43709	1.45392	1.43382	1.40754	1.39584	1.3666	1.29226	1.1767	1.04714	0.900534	0.740977	0.602991	0.523498
0.111716	0.116177	0.124934	0.14131	0.161572	0.172927	0.187612	0.197653	0.204804	0.214464	0.232823	0.254833	0.27697	0.320512	0.394623	0.453159	0.487479	0.532998	0.576944	0.619965	0.662119	0.69584	0.710983	0.741551	0.808119	0.892743	0.976891	1.05475	1.12621	1.18268	1.23104	1.28058	1.33308	1.36892	1.39505	1.42417	1.45765	1.49272	1.51395	1.49113	1.46353	1.44741	1.41888	1.33981	1.22339	1.09142	0.938806	0.772173	0.628821	0.546117
0.117981	0.119181	0.131434	0.144205	0.169617	0.180498	0.188309	0.21187	0.225428	0.231699	0.244902	0.267991	0.286269	0.34593	0.421474	0.479968	0.520208	0.566701	0.618977	0.663721	0.700551	0.735905	0.757284	0.788332	0.857648	0.946805	1.02971	1.11676	1.19475	1.24951	1.30411	1.35435	1.41128	1.4456	1.47021	1.50023	1.54021	1.58114	1.59531	1.57035	1.53774	1.52805	1.49422	1.41076	1.28838	1.15028	0.992215	0.814322	0.663261	0.579195
0.11977	0.11828	0.13391	0.152568	0.180678	0.197705	0.204347	0.226087	0.24098	0.24926	0.270297	0.296352	0.321002	0.382533	0.474234	0.544048	0.586069	0.638248	0.695624	0.743885	0.787023	0.827062	0.842704	0.879313	0.953505	1.05062	1.14363	1.23568	1.32178	1.38053	1.4376	1.49076	1.55187	1.58763	1.61197	1.64592	1.68096	1.72637	1.74487	1.7138	1.67657	1.66251	1.6269	1.53343	1.40143	1.25312	1.08275	0.894045	0.728912	0.638291
0.12156	0.127292	0.149695	0.161574	0.181348	0.201835	0.218642	0.236836	0.243009	0.259341	0.281137	0.313018	0.337138	0.401088	0.499907	0.572819	0.620818	0.674587	0.732889	0.782631	0.834422	0.875047	0.886255	0.925183	1.00563	1.10853	1.20301	1.2953	1.38335	1.44951	1.50561	1.56231	1.62538	1.66152	1.68836	1.72372	1.76231	1.79957	1.81857	1.79055	1.75225	1.73207	1.69655	1.60251	1.46581	1.31036	1.12874	0.935224	0.767523	0.672023
0.123648	0.127893	0.150314	0.16479	0.185706	0.204244	0.222826	0.243772	0.250785	0.265845	0.290118	0.327052	0.351906	0.422186	0.525581	0.606821	0.657385	0.708101	0.771389	0.824216	0.872534	0.915112	0.929041	0.965737	1.05256	1.15982	1.25582	1.3546	1.44232	1.51055	1.57024	1.62631	1.68725	1.7286	1.75636	1.78971	1.82977	1.86906	1.8871	1.85626	1.81377	1.79022	1.75278	1.65548	1.51462	1.35965	1.17272	0.970995	0.79981	0.699871
0.126333	0.129695	0.149695	0.169615	0.188052	0.205964	0.236423	0.255561	0.26397	0.278203	0.305294	0.339332	0.371324	0.441504	0.547014	0.629488	0.683649	0.741992	0.804062	0.859455	0.908404	0.95378	0.968619	1.00432	1.09295	1.20387	1.3077	1.40945	1.5013	1.56862	1.62745	1.6855	1.74737	1.79219	1.81911	1.85309	1.8931	1.93144	1.94979	1.91572	1.87594	1.85158	1.81185	1.71248	1.56782	1.40511	1.21699	1.00954	0.828869	0.72772
0.126631	0.138407	0.152171	0.169615	0.198108	0.216977	0.23712	0.265271	0.271747	0.291861	0.322637	0.354828	0.391836	0.46921	0.584936	0.673298	0.728297	0.78605	0.852982	0.913065	0.961728	1.00937	1.02577	1.0634	1.15406	1.27149	1.37912	1.48338	1.5794	1.65166	1.71183	1.77249	1.83896	1.87866	1.91018	1.94148	1.98236	2.02832	2.04549	2.00581	1.96252	1.93817	1.89714	1.79241	1.64067	1.47118	1.27583	1.06029	0.875013	0.766943
0.142441	0.148921	0.170433	0.18827	0.218219	0.245195	0.25281	0.293011	0.307246	0.315276	0.357014	0.395177	0.427663	0.52386	0.655125	0.754161	0.811129	0.881321	0.951706	1.01795	1.07142	1.11497	1.13442	1.17246	1.27369	1.39594	1.51194	1.62695	1.73089	1.80451	1.86794	1.93394	2.00214	2.04391	2.07415	2.10853	2.15228	2.19705	2.21206	2.16869	2.11811	2.09094	2.04624	1.93924	1.77321	1.59507	1.38636	1.15706	0.955193	0.841336
0.139458	0.148621	0.169814	0.191165	0.229616	0.24726	0.266756	0.296826	0.317727	0.339666	0.370641	0.409504	0.448722	0.549786	0.682212	0.78838	0.852342	0.918225	1.0001	1.06321	1.11882	1.16808	1.18484	1.22607	1.3281	1.4557	1.57445	1.69563	1.80073	1.87399	1.94135	2.00738	2.08086	2.12287	2.15018	2.18233	2.23055	2.27651	2.28959	2.24182	2.18777	2.16195	2.11716	1.99903	1.83381	1.64951	1.43648	1.20198	0.995553	0.875067
0.144529	0.158834	0.179099	0.200815	0.230286	0.261714	0.293602	0.319712	0.328208	0.353324	0.395417	0.433772	0.473063	0.57368	0.721546	0.836985	0.903456	0.975463	1.05184	1.11932	1.18143	1.23206	1.24459	1.2847	1.39485	1.52948	1.65367	1.77306	1.88077	1.96266	2.03079	2.09471	2.16688	2.21319	2.2423	2.27714	2.321	2.36594	2.38146	2.33899	2.28086	2.24644	2.20103	2.0836	1.90953	1.72013	1.4976	1.2555	1.04573	0.919128
0.151091	0.15553	0.185289	0.208212	0.247046	0.273414	0.298135	0.331502	0.353565	0.375437	0.410902	0.460086	0.503694	0.610791	0.771715	0.882975	0.954165	1.03496	1.11489	1.18479	1.24965	1.29713	1.31381	1.35487	1.46525	1.60356	1.73587	1.86161	1.97831	2.05844	2.12968	2.19543	2.27462	2.31765	2.34351	2.38151	2.42622	2.47246	2.4875	2.43435	2.37623	2.34765	2.29453	2.17096	1.99189	1.79384	1.56915	1.31637	1.09241	0.964234
0.160637	0.169949	0.192099	0.223651	0.263135	0.292686	0.312081	0.340864	0.365398	0.38812	0.435059	0.483185	0.528308	0.640276	0.813876	0.934195	0.999823	1.0873	1.17035	1.24491	1.31034	1.35971	1.37142	1.41745	1.53353	1.67642	1.8115	1.94286	2.06143	2.14578	2.21255	2.28225	2.36012	2.40604	2.43231	2.46625	2.5165	2.56358	2.57704	2.52032	2.45614	2.42669	2.37287	2.24686	2.06292	1.86315	1.62527	1.36836	1.13923	1.00555
0.166603	0.181665	0.202622	0.23716	0.284252	0.319184	0.346598	0.386636	0.417464	0.431372	0.481205	0.531135	0.584647	0.713227	0.901024	1.03533	1.10872	1.20253	1.29185	1.37284	1.43973	1.49078	1.50574	1.54853	1.67129	1.82459	1.96964	2.11043	2.2335	2.32311	2.39329	2.46807	2.55059	2.59436	2.62005	2.65379	2.70479	2.75209	2.76578	2.70231	2.63338	2.60179	2.54314	2.40903	2.21209	1.9966	1.75151	1.48067	1.23609	1.09354
0.169586	0.185571	0.216241	0.250991	0.303358	0.328132	0.361938	0.401894	0.430312	0.451209	0.495141	0.557157	0.608167	0.743983	0.932351	1.07173	1.15498	1.24697	1.34483	1.42344	1.49129	1.54653	1.56075	1.60291	1.72555	1.89066	2.03496	2.17704	2.30106	2.39259	2.46991	2.53893	2.62357	2.66528	2.69277	2.72777	2.77774	2.82851	2.83698	2.7784	2.70434	2.66958	2.61074	2.4699	2.27224	2.05471	1.80335	1.52199	1.27322	1.1308
0.182711	0.195183	0.223979	0.26643	0.314755	0.345338	0.382858	0.42582	0.44654	0.473648	0.523015	0.587858	0.642627	0.779569	0.980871	1.12992	1.21478	1.31098	1.41124	1.49375	1.56479	1.61828	1.63059	1.6752	1.80418	1.97014	2.12137	2.26878	2.39909	2.49218	2.56829	2.6393	2.7235	2.77044	2.7973	2.83335	2.88312	2.93435	2.94252	2.87886	2.80134	2.76387	2.70614	2.56036	2.35657	2.13225	1.87247	1.5859	1.3308	1.18153
0.183606	0.206599	0.232954	0.274793	0.329168	0.363578	0.396804	0.442464	0.470207	0.496737	0.551507	0.619435	0.677087	0.823035	1.03316	1.19248	1.27882	1.37632	1.48118	1.56373	1.63797	1.6939	1.70531	1.74857	1.88053	2.05701	2.21169	2.36544	2.50068	2.5959	2.67427	2.7534	2.83698	2.88067	2.91127	2.94587	2.99572	3.04762	3.05189	2.9841	2.9042	2.86653	2.80375	2.65686	2.44831	2.21583	1.95015	1.65135	1.38986	1.2354
0.195538	0.213208	0.239764	0.290875	0.344251	0.381128	0.415282	0.464657	0.489816	0.512671	0.576283	0.641071	0.709085	0.858112	1.08616	1.24457	1.33236	1.43638	1.54052	1.63037	1.7001	1.75742	1.76704	1.8119	1.94561	2.12216	2.28295	2.44112	2.58121	2.67448	2.75393	2.83439	2.91761	2.9647	2.98888	3.02523	3.07399	3.12776	3.13359	3.05838	2.97792	2.93737	2.87482	2.72501	2.50846	2.27556	2.00456	1.70167	1.43237	1.27514
0.214032	0.240545	0.275358	0.334297	0.391178	0.429307	0.466534	0.523606	0.563182	0.581614	0.649992	0.721184	0.786483	0.963853	1.20887	1.38472	1.48469	1.59642	1.70882	1.79838	1.87689	1.93445	1.94583	1.98673	2.13397	2.32593	2.49438	2.66212	2.80869	2.91136	2.99137	3.07133	3.16195	3.20315	3.23203	3.26279	3.31943	3.36766	3.37402	3.29488	3.20301	3.16163	3.08963	2.93272	2.70221	2.4536	2.17379	1.85419	1.56758	1.39817
0.224174	0.249557	0.287738	0.342981	0.406597	0.45787	0.502794	0.558975	0.591244	0.611207	0.689634	0.766211	0.837899	1.00961	1.26893	1.45468	1.55863	1.67136	1.78794	1.88806	1.96785	2.02732	2.03033	2.07588	2.22952	2.42389	2.59861	2.76896	2.92163	3.02633	3.11119	3.18835	3.27942	3.33084	3.35211	3.38556	3.43701	3.48719	3.4954	3.41544	3.31823	3.27118	3.20287	3.0399	2.80331	2.55056	2.25519	1.93183	1.6378	1.46446
0.236404	0.26668	0.301357	0.365818	0.432742	0.474733	0.524411	0.583249	0.611529	0.639499	0.710384	0.79545	0.868804	1.05002	1.32287	1.51745	1.62227	1.73876	1.86265	1.95971	2.03702	2.0972	2.10215	2.14363	2.29902	2.49813	2.67611	2.85449	3.00734	3.11483	3.19929	3.27791	3.36979	3.41557	3.44336	3.47481	3.52574	3.579	3.58361	3.49713	3.39717	3.34974	3.27853	3.11394	2.87193	2.61442	2.31888	1.98854	1.68812	1.51022
0.255495	0.283803	0.324261	0.38962	0.462574	0.514308	0.557533	0.617231	0.658524	0.679824	0.75715	0.845155	0.916665	1.1123	1.39895	1.60507	1.71177	1.83516	1.96296	2.06308	2.14736	2.20155	2.20377	2.24691	2.40981	2.61288	2.79941	2.97787	3.13826	3.24899	3.33295	3.41466	3.50899	3.55811	3.57918	3.61061	3.66477	3.71611	3.72299	3.62839	3.52411	3.47665	3.40552	3.23166	2.98316	2.72035	2.41627	2.07409	1.7644	1.58174
0.265041	0.292515	0.340356	0.409883	0.489389	0.542527	0.591004	0.655721	0.692333	0.718197	0.786262	0.882287	0.957688	1.16034	1.45995	1.66719	1.78127	1.9101	2.03855	2.1369	2.22278	2.28044	2.27926	2.32422	2.48662	2.69975	2.8891	3.07103	3.23223	3.34725	3.43167	3.51366	3.60978	3.65384	3.67445	3.7056	3.75952	3.81315	3.81436	3.7198	3.6133	3.56388	3.48875	3.31545	3.06568	2.79598	2.48568	2.14064	1.8244	1.63547
0.301433	0.336674	0.383688	0.46006	0.555757	0.604471	0.660386	0.730621	0.768404	0.800798	0.883198	0.980528	1.0731	1.29328	1.62012	1.85028	1.97097	2.10516	2.24571	2.35117	2.43447	2.49707	2.49243	2.53337	2.7082	2.93186	3.13022	3.33082	3.50168	3.61689	3.70489	3.78836	3.88904	3.93439	3.95168	3.98222	4.03826	4.09499	4.09164	3.98809	3.87289	3.81785	3.74131	3.55352	3.29101	3.00962	2.6856	2.32227	1.99054	1.78975
0.32112	0.356801	0.409068	0.489973	0.576539	0.640605	0.69804	0.768071	0.813708	0.829741	0.923769	1.02702	1.11686	1.3431	1.69101	1.93724	2.05643	2.19648	2.33419	2.44704	2.536	2.5946	2.58579	2.62359	2.80512	3.03598	3.24242	3.44084	3.6117	3.73765	3.82488	3.90863	4.00652	4.0572	4.07142	4.10343	4.15772	4.20606	4.21002	4.09942	3.979	3.92452	3.84255	3.65776	3.38728	3.09819	2.76943	2.39936	2.05767	1.85708
0.343492	0.379031	0.435376	0.526962	0.619444	0.677084	0.73709	0.814884	0.858336	0.881772	0.976419	1.0852	1.17293	1.41376	1.7645	2.01723	2.14452	2.2893	2.43415	2.54591	2.63336	2.69414	2.68405	2.72293	2.90296	3.14041	3.34883	3.55594	3.73289	3.8561	3.94757	4.03492	4.13077	4.17686	4.19238	4.22221	4.27753	4.32999	4.3259	4.21438	4.09065	4.03408	3.94995	3.75829	3.484	3.19059	2.85897	2.47728	2.1318	1.92494
0.371234	0.408471	0.473756	0.564916	0.666035	0.737995	0.787644	0.870712	0.917502	0.940308	1.03836	1.14514	1.24294	1.49535	1.87732	2.13907	2.26412	2.41583	2.56414	2.68018	2.76851	2.82754	2.81195	2.85051	3.03966	3.28057	3.50307	3.70984	3.89427	4.01937	4.11127	4.19929	4.29864	4.34229	4.35197	4.3811	4.43406	4.48857	4.4868	4.36425	4.24217	4.17833	4.09511	3.89676	3.61564	3.31713	2.97507	2.59083	2.23135	2.01959
0.400765	0.439713	0.50935	0.605443	0.721007	0.784798	0.840291	0.928274	0.969907	0.999169	1.10154	1.21531	1.31295	1.58737	1.98543	2.26113	2.39806	2.54725	2.70524	2.82565	2.91135	2.9718	2.95315	2.99055	3.18322	3.43845	3.65949	3.87774	4.07412	4.19803	4.29184	4.3791	4.48372	4.52502	4.53814	4.56256	4.61635	4.67793	4.66787	4.54328	4.40964	4.34862	4.26221	4.05816	3.76768	3.45956	3.11359	2.71686	2.34665	2.12746
0.461916	0.509407	0.579919	0.698076	0.816201	0.901459	0.957439	1.0486	1.10109	1.11461	1.22914	1.35507	1.46118	1.74649	2.18305	2.48694	2.62959	2.79013	2.94932	3.07549	3.16468	3.2181	3.19229	3.22415	3.42706	3.69367	3.92951	4.1531	4.34989	4.48951	4.58143	4.66821	4.77115	4.81046	4.81869	4.84388	4.89852	4.94826	4.94632	4.80794	4.66288	4.59793	4.50434	4.29375	3.99407	3.67437	3.31138	2.90154	2.52127	2.29023
0.494729	0.550562	0.620775	0.746001	0.876536	0.952735	1.01915	1.11518	1.16194	1.18193	1.29634	1.4267	1.53284	1.83825	2.29445	2.60768	2.75767	2.92042	3.08901	3.21361	3.30368	3.35972	3.32417	3.35539	3.56482	3.84168	4.08	4.31495	4.51548	4.65493	4.75053	4.83636	4.94059	4.97571	4.9844	5.00468	5.05815	5.11395	5.10271	4.9649	4.81472	4.74428	4.65439	4.43888	4.1251	3.80297	3.43505	3.01329	2.62835	2.38698
0.536192	0.597425	0.672464	0.79457	0.934524	1.01674	1.07668	1.18106	1.22111	1.24177	1.36045	1.49775	1.60969	1.92442	2.40115	2.72102	2.87889	3.0413	3.21017	3.33602	3.42762	3.47821	3.43969	3.46869	3.68201	3.96398	4.20782	4.43864	4.64932	4.78661	4.88385	4.9695	5.07127	5.11057	5.1169	5.13839	5.1831	5.24143	5.22693	5.08249	4.92979	4.85785	4.76511	4.54669	4.23255	3.90273	3.53244	3.1109	2.71392	2.47367
0.579445	0.634976	0.717343	0.848927	0.992847	1.07938	1.14118	1.25007	1.29853	1.31396	1.43106	1.57202	1.68709	2.01211	2.50691	2.83741	2.99667	3.16595	3.3398	3.46378	3.55413	3.60509	3.56301	3.58884	3.80088	4.08982	4.33752	4.5714	4.78785	4.92407	5.01886	5.10642	5.21047	5.24421	5.24381	5.26567	5.31664	5.37127	5.35298	5.20272	5.04599	4.96982	4.8763	4.65248	4.33517	4.00101	3.62983	3.20518	2.80082	2.55656
0.619416	0.68244	0.771199	0.911648	1.06257	1.14958	1.21788	1.32427	1.37697	1.3803	1.51066	1.65242	1.77023	2.11328	2.62279	2.97865	3.13122	3.30622	3.48409	3.61042	3.70321	3.75137	3.70344	3.7266	3.94856	4.24045	4.49222	4.73659	4.94858	5.09562	5.19133	5.27525	5.37834	5.41244	5.41459	5.42908	5.47918	5.5334	5.51654	5.36149	5.19523	5.12083	5.02082	4.79653	4.473	4.13432	3.75379	3.31971	2.91208	2.65723
0.737243	0.814618	0.902432	1.05832	1.23519	1.33507	1.40023	1.5136	1.56089	1.56046	1.70329	1.85154	1.97179	2.34789	2.91344	3.2899	3.45487	3.63552	3.82035	3.95329	4.03869	4.08028	4.01853	4.0322	4.26508	4.57407	4.83444	5.08986	5.32011	5.46253	5.55721	5.64071	5.74745	5.77684	5.77275	5.77898	5.82538	5.8761	5.85868	5.68857	5.51016	5.43039	5.32882	5.09438	4.75592	4.40298	4.01641	3.57039	3.14401	2.88041
0.796604	0.864786	0.968359	1.12458	1.31296	1.40906	1.48042	1.59891	1.63831	1.64176	1.78195	1.94042	2.06232	2.44905	3.03404	3.42765	3.60276	3.77786	3.96728	4.10025	4.18649	4.22657	4.15759	4.17224	4.40681	4.72378	4.99196	5.24948	5.48148	5.62994	5.72597	5.80474	5.90907	5.93668	5.9278	5.93961	5.98552	6.03942	6.01307	5.83943	5.65598	5.57175	5.46844	5.2296	4.88876	4.52967	4.13536	3.68713	3.25365	2.9884
0.848508	0.929673	1.025	1.20081	1.38737	1.48683	1.55991	1.68005	1.72453	1.71396	1.86465	2.0258	2.14464	2.53776	3.13838	3.54556	3.71104	3.89912	4.08879	4.222	4.30291	4.33931	4.26455	4.27172	4.50709	4.82728	5.09572	5.35823	5.58761	5.73746	5.82587	5.91335	6.01038	6.03957	6.02569	6.03251	6.07735	6.12243	6.09611	5.91585	5.72938	5.64484	5.54331	5.30302	4.95813	4.60073	4.2052	3.75243	3.322	3.05194
0.92338	0.997264	1.09712	1.2854	1.48625	1.58869	1.66102	1.77991	1.82257	1.8203	1.96251	2.12696	2.25239	2.66359	3.28794	3.7099	3.88216	4.06744	4.26946	4.39636	4.47489	4.50733	4.42592	4.43105	4.67381	4.9964	5.27214	5.53979	5.7754	5.92572	6.01792	6.09677	6.19876	6.22526	6.20818	6.20669	6.25671	6.30283	6.26951	6.08384	5.89099	5.80436	5.69999	5.45621	5.1005	4.74713	4.34986	3.89191	3.45249	3.1751
0.992287	1.06786	1.16676	1.3671	1.57508	1.68333	1.75167	1.87389	1.90777	1.89737	2.04427	2.20912	2.34347	2.76246	3.41325	3.84308	4.01328	4.20602	4.40615	4.53281	4.61165	4.64228	4.55244	4.5556	4.80061	5.12763	5.40528	5.67525	5.91669	6.06864	6.15799	6.23575	6.34039	6.36449	6.33981	6.33831	6.38441	6.43148	6.39856	6.20901	6.00654	5.91617	5.81434	5.5651	5.20447	4.84321	4.44354	3.9855	3.54303	3.26061
1.1644	1.25351	1.36175	1.5797	1.80267	1.91425	1.98074	2.10829	2.14478	2.11493	2.26633	2.4439	2.58222	3.02478	3.72745	4.182	4.3642	4.56376	4.75972	4.88837	4.96282	4.98517	4.88083	4.87305	5.12475	5.46663	5.75797	6.03106	6.27477	6.42976	6.52049	6.59674	6.69351	6.71142	6.68277	6.67954	6.71774	6.76066	6.72486	6.51765	6.30796	6.21545	6.10227	5.84622	5.48165	5.11217	4.7043	4.23826	3.78209	3.49386
1.27805	1.36346	1.48215	1.70096	1.94177	2.05809	2.11915	2.24873	2.28035	2.24663	2.40198	2.58951	2.72963	3.19153	3.92954	4.40541	4.59007	4.79007	4.9932	5.12351	5.19694	5.21422	5.09766	5.08675	5.34344	5.69444	5.98658	6.26986	6.52656	6.68584	6.77565	6.85102	6.9514	6.96682	6.93308	6.92803	6.96421	7.00851	6.96679	6.75416	6.53483	6.43987	6.33129	6.07082	5.69943	5.32523	4.91608	4.44304	3.98053	3.6867
1.2794	1.35947	1.46378	1.69464	1.94011	2.04863	2.12198	2.25047	2.261	2.24029	2.39014	2.57097	2.71342	3.17423	3.90585	4.38974	4.56864	4.76312	4.97745	5.10451	5.17577	5.19696	5.07165	5.05914	5.31399	5.66288	5.95791	6.23523	6.48617	6.6429	6.73204	6.80427	6.90432	6.92023	6.88952	6.87947	6.91932	6.96627	6.92111	6.71131	6.49325	6.39072	6.2835	6.02466	5.64924	5.27444	4.86567	4.39136	3.93911	3.64147
1.40409	1.47903	1.59625	1.84131	2.10033	2.21106	2.25586	2.39472	2.41788	2.37622	2.53632	2.7154	2.86822	3.35267	4.11124	4.61119	4.78562	4.99809	5.20527	5.33331	5.40892	5.41872	5.29139	5.26905	5.53466	5.88837	6.18668	6.47753	6.73278	6.89599	6.97641	7.05752	7.15734	7.17737	7.13529	7.12293	7.16271	7.20973	7.16254	6.94353	6.71784	6.62173	6.50652	6.23996	5.85539	5.4822	5.06103	4.5863	4.11077	3.80699
1.4542	1.54152	1.65011	1.89727	2.15865	2.26268	2.33117	2.45991	2.47941	2.45102	2.61312	2.79903	2.93933	3.45688	4.2455	4.74981	4.93512	5.14345	5.36493	5.49196	5.56585	5.57712	5.44787	5.42155	5.70108	6.07074	6.3742	6.68676	6.95508	7.11998	7.21402	7.28435	7.39056	7.40307	7.36952	7.35423	7.3982	7.44912	7.40131	7.18135	6.94374	6.84984	6.74407	6.48934	6.10233	5.72055	5.31494	4.8392	4.36961	4.05959
1.52042	1.58898	1.70768	1.96739	2.22167	2.34252	2.38626	2.51816	2.53959	2.48874	2.64285	2.84405	2.98473	3.48535	4.27565	4.78294	4.96259	5.17282	5.37976	5.51034	5.5729	5.57867	5.43809	5.41517	5.68431	6.04733	6.34545	6.6451	6.91101	7.06605	7.16002	7.22498	7.32139	7.33983	7.29296	7.27435	7.31856	7.35918	7.31294	7.08715	6.8539	6.75474	6.64298	6.37627	5.99382	5.61167	5.20155	4.72107	4.248	3.94558
1.50133	1.59859	1.71325	1.95839	2.20625	2.33013	2.3758	2.50429	2.5308	2.46402	2.63542	2.83002	2.96558	3.45841	4.23608	4.75199	4.92784	5.13441	5.33773	5.47126	5.53735	5.53954	5.39897	5.36596	5.63494	5.99188	6.297	6.58246	6.83972	7.00286	7.08475	7.15601	7.24736	7.26192	7.21884	7.20732	7.23755	7.276	7.23491	7.00875	6.77611	6.67731	6.55959	6.29882	5.92158	5.53958	5.12501	4.65646	4.19096	3.88648
1.56278	1.63705	1.7541	2.00149	2.28334	2.38863	2.43367	2.5681	2.58489	2.53297	2.68869	2.87563	3.02247	3.5367	4.32417	4.84135	5.03007	5.23157	5.44687	5.56879	5.63375	5.63582	5.4989	5.46924	5.73521	6.10401	6.41076	6.70424	6.97128	7.12494	7.22145	7.28229	7.3909	7.39224	7.35379	7.33444	7.38138	7.42512	7.36696	7.13985	6.90989	6.81386	6.70016	6.43389	6.04793	5.66553	5.26324	4.7854	4.31123	4.00598
1.56457	1.64185	1.75658	2.01757	2.28737	2.39827	2.4518	2.57781	2.59977	2.54402	2.71099	2.89142	3.03997	3.56415	4.36279	4.87666	5.05472	5.26772	5.48007	5.61355	5.67538	5.67433	5.53772	5.50934	5.77971	6.15329	6.45514	6.75639	7.02637	7.18714	7.27241	7.34818	7.44999	7.45932	7.41532	7.39417	7.43493	7.48158	7.44299	7.20408	6.97238	6.87201	6.75891	6.49429	6.1108	5.72997	5.31922	4.84502	4.37338	4.06377
1.56338	1.64846	1.76958	2.0195	2.30077	2.39552	2.46226	2.58682	2.61329	2.54337	2.69241	2.88849	3.03724	3.54025	4.3416	4.85792	5.03856	5.25115	5.46383	5.58048	5.65168	5.65383	5.51235	5.48443	5.74497	6.11633	6.42358	6.71919	6.97485	7.14082	7.23259	7.29567	7.40064	7.40307	7.36218	7.34416	7.38378	7.42275	7.3763	7.14808	6.90956	6.81129	6.69921	6.43358	6.05216	5.67288	5.2581	4.78318	4.31661	4.00729
1.54548	1.63584	1.75968	2.00406	2.27865	2.36799	2.4267	2.57087	2.57746	2.50955	2.67073	2.87037	3.00825	3.51941	4.30579	4.82479	5.01835	5.21349	5.42179	5.54875	5.61645	5.61874	5.47843	5.45071	5.71296	6.08398	6.38857	6.67944	6.93693	7.09847	7.18871	7.25758	7.36032	7.35765	7.32127	7.30492	7.34259	7.38082	7.32694	7.10296	6.87734	6.77948	6.6613	6.39269	6.01498	5.63492	5.23354	4.75656	4.28378	3.9882
1.52639	1.62263	1.73615	1.97383	2.24848	2.34596	2.39602	2.52579	2.5592	2.50565	2.66763	2.85049	2.9809	3.50111	4.2846	4.79645	4.97997	5.18261	5.39848	5.52269	5.59179	5.59234	5.45642	5.43188	5.6898	6.06026	6.36482	6.65973	6.91911	7.07995	7.16846	7.23287	7.33981	7.33669	7.30344	7.2872	7.32611	7.36831	7.31827	7.08649	6.85911	6.76181	6.64582	6.3806	5.99956	5.6205	5.21241	4.73105	4.25849	3.96833
1.54429	1.62683	1.75039	1.99248	2.25988	2.37487	2.43298	2.55007	2.57205	2.51801	2.68374	2.88206	3.01043	3.51789	4.31333	4.83002	5.02037	5.22328	5.43133	5.55743	5.63054	5.62712	5.48699	5.46043	5.72638	6.10154	6.4042	6.69852	6.96577	7.12593	7.21976	7.27783	7.38534	7.39329	7.35309	7.33374	7.37554	7.41531	7.37763	7.15039	6.91347	6.80936	6.69795	6.43513	6.05246	5.66847	5.25982	4.78845	4.31634	4.01618
1.58366	1.65026	1.76958	2.02207	2.27999	2.41204	2.4532	2.59029	2.60518	2.54793	2.70975	2.89844	3.03778	3.54788	4.36609	4.87187	5.05795	5.26809	5.47442	5.6082	5.67218	5.67402	5.53313	5.50509	5.77301	6.13974	6.45233	6.7494	7.01535	7.18251	7.26735	7.3317	7.4347	7.44779	7.39889	7.38792	7.42601	7.47076	7.43098	7.19058	6.96001	6.85884	6.75133	6.47912	6.09568	5.71349	5.30123	4.83476	4.35643	4.052
1.53832	1.62082	1.73677	1.98669	2.25519	2.36799	2.42461	2.55353	2.57948	2.51671	2.6794	2.8692	3.00606	3.51992	4.31898	4.83786	5.01916	5.2229	5.44228	5.57079	5.63951	5.63551	5.50654	5.47987	5.74192	6.11448	6.41951	6.71442	6.98035	7.15075	7.23596	7.31077	7.40655	7.41704	7.38071	7.36569	7.40335	7.44879	7.40431	7.17773	6.94276	6.84149	6.73206	6.47323	6.08117	5.69996	5.29695	4.81591	4.34378	4.04311
1.55503	1.62563	1.75225	2.0002	2.25586	2.37349	2.4281	2.56324	2.58489	2.51345	2.67197	2.87388	3.00168	3.50111	4.29826	4.80953	4.99411	5.19316	5.40095	5.5267	5.59147	5.58612	5.44756	5.42033	5.67822	6.04209	6.3442	6.63079	6.88897	7.05017	7.13437	7.19581	7.29498	7.30035	7.25275	7.23858	7.27016	7.30812	7.26025	7.03543	6.79791	6.70012	6.59275	6.32546	5.94878	5.57783	5.17813	4.71497	4.25123	3.95447
1.74355	1.81849	1.93796	2.2067	2.48714	2.59099	2.63799	2.77338	2.79316	2.70337	2.85903	3.06392	3.20516	3.73801	4.57383	5.11903	5.31291	5.52981	5.74216	5.8674	5.92871	5.91907	5.76449	5.72016	5.99246	6.37016	6.67766	6.97961	7.24349	7.40418	7.49417	7.55887	7.6481	7.64903	7.6013	7.57442	7.61515	7.64625	7.59805	7.36054	7.11365	7.01819	6.8979	6.63494	6.25165	5.87828	5.47203	5.00641	4.53643	4.23034
7.12302	7.03712	7.07836	7.70038	8.36439	8.41098	8.22202	8.33123	8.11067	7.63404	7.86939	8.25548	8.49009	9.81963	12.03	13.4599	13.9533	14.4378	14.8678	14.9847	14.8901	14.6173	13.9935	13.6684	14.1042	14.8165	15.3575	15.8832	16.3805	16.654	16.7179	16.6861	16.7035	16.5176	16.2372	16.0507	15.996	15.9873	15.819	15.2818	14.7737	14.6272	14.5488	14.2107	13.6658	13.2029	12.8134	12.331	11.6881	11.2071
14.9882	14.6618	14.6061	15.7172	16.9621	16.8825	16.3659	16.4489	15.8954	14.8167	15.1987	15.8467	16.2527	18.7923	23.0763	25.9006	26.9303	27.9365	28.8088	29.0295	28.7938	28.1836	26.9009	26.1777	26.9564	28.3029	29.285	30.2434	31.1848	31.7266	31.8171	31.6977	31.6622	31.245	30.6571	30.2571	30.13	30.1176	29.7932	28.7914	27.8899	27.7225	27.7373	27.3346	26.5645	26.0122	25.6896	25.1882	24.2802	23.549
16.8394	16.4712	16.3786	17.6475	19.047	18.926	18.3311	18.3782	17.7127	16.524	16.9092	17.5654	17.9732	20.7149	25.3934	28.436	29.4362	30.4473	31.3413	31.5047	31.1835	30.4942	29.0798	28.2599	29.0794	30.4907	31.5249	32.5698	33.5781	34.1295	34.224	34.0555	34.011	33.5505	32.9112	32.4454	32.3253	32.2946	31.9435	30.877	29.8712	29.6715	29.7207	29.2881	28.45	27.8789	27.5375	27.0413	26.0744	25.29
17.405	17.0119	16.8936	18.2471	19.7496	19.7244	19.1707	19.3935	18.7838	17.6973	18.4056	19.5395	20.5528	24.605	31.2291	36.143	38.7732	41.3271	43.5272	44.5487	44.6846	44.109	42.4109	41.5652	43.1157	45.5678	47.5364	49.4823	51.4256	52.6966	53.1859	53.3052	53.5106	53.1198	52.4091	51.9985	52.1422	52.4095	52.0755	50.4903	49.1122	49.1106	49.4816	49.1254	48.1949	47.7221	47.5954	47.1132	45.7515	44.6578
17.3466	16.9271	16.8606	18.1939	19.5646	19.5386	19.0454	19.1577	18.5803	17.5477	18.2589	19.3608	20.434	24.3812	30.9642	35.8851	38.3787	40.9337	43.1059	44.0907	44.2014	43.638	41.891	41.0127	42.6095	45.0196	46.9532	48.9228	50.8135	52.0659	52.5549	52.6141	52.7905	52.4382	51.7236	51.3238	51.5208	51.7645	51.4233	49.8722	48.5191	48.4655	48.8679	48.5294	47.5588	47.111	46.9682	46.5045	45.1963	44.0741
17.8143	17.3549	17.227	18.6108	20.0687	19.913	19.4025	19.6071	19.0888	17.9691	18.6157	19.7397	20.7622	24.7797	31.3448	36.206	38.6761	41.1807	43.3546	44.2831	44.3987	43.8517	42.1257	41.2435	42.8045	45.1774	47.0632	49.0704	50.9509	52.1824	52.6683	52.7486	52.9351	52.5053	51.8243	51.3627	51.5373	51.7997	51.394	49.8458	48.4592	48.4707	48.8022	48.4352	47.5032	47.0945	46.9705	46.4646	45.136	44.0386
18.158	17.7394	17.5984	18.9504	20.3905	20.3535	19.726	19.8901	19.3484	18.1304	18.8535	19.9876	20.9241	24.9993	31.5483	36.2967	38.7536	41.2048	43.2641	44.2029	44.3321	43.6827	41.9546	41.0588	42.5534	44.9482	46.8232	48.7142	50.5958	51.8251	52.212	52.3478	52.4986	51.991	51.3237	50.9098	50.9963	51.2289	50.8658	49.3557	48.0191	47.9515	48.3196	47.9792	47.0341	46.5154	46.445	45.9899	44.6603	43.5637
17.8811	17.4558	17.4152	18.7034	20.1975	20.1277	19.5419	19.6793	19.1591	17.9119	18.5166	19.7537	20.7053	24.6496	31.2393	35.9967	38.4692	40.9156	43.0042	43.9705	44.0656	43.4293	41.6857	40.8061	42.3047	44.7017	46.5682	48.498	50.3676	51.5604	52.0094	52.1309	52.3456	51.8233	51.167	50.7598	50.859	51.0612	50.6924	49.1765	47.829	47.8101	48.1528	47.8132	46.8479	46.3671	46.285	45.7725	44.4451	43.4131
17.6282	17.2011	17.0983	18.4409	19.9722	19.8689	19.2797	19.5461	18.9265	17.8078	18.5909	19.6508	20.574	24.5804	31.2091	35.9409	38.4498	40.9096	43.0042	43.9865	44.0912	43.5386	41.8177	40.9689	42.5022	44.8816	46.8032	48.7193	50.6372	51.8277	52.2417	52.3533	52.582	52.0972	51.4215	51.0682	51.1721	51.3939	51.1112	49.4716	48.1467	48.1108	48.4535	48.1106	47.184	46.6873	46.5478	46.1052	44.811	43.7269
17.7809	17.3213	17.2221	18.5696	19.999	19.9846	19.3467	19.5905	19.0401	17.9223	18.4918	19.6508	20.6703	24.6292	31.2732	36.1432	38.6114	41.1476	43.2528	44.1896	44.3167	43.7473	41.9937	41.1415	42.6777	45.0837	47.0482	48.9228	50.8446	52.14	52.5846	52.6443	52.8656	52.4131	51.6816	51.3266	51.4028	51.6807	51.3406	49.7826	48.4279	48.4038	48.7466	48.3733	47.4887	46.9698	46.8494	46.3382	45.0112	43.9298
17.5614	17.1434	16.9844	18.3843	19.806	19.8139	19.1849	19.3464	18.7317	17.6829	18.4373	19.4637	20.4253	24.4056	30.9227	35.8084	38.2494	40.6867	42.8064	43.7914	43.9119	43.3274	41.6416	40.6943	42.2681	44.6623	46.5032	48.4293	50.2899	51.5604	51.9878	52.109	52.3011	51.9072	51.2146	50.7626	50.9359	51.1613	50.8258	49.2872	47.8863	47.805	48.216	47.8404	46.86	46.4566	46.3056	45.8279	44.5398	43.4403
17.3705	16.9319	16.8506	18.0961	19.5378	19.5275	18.9506	19.0468	18.5695	17.48	18.14	19.2672	20.2152	24.1005	30.6815	35.3481	37.7516	40.2137	42.2582	43.2196	43.297	42.741	41.0695	40.2326	41.739	44.0807	45.9881	47.885	49.748	50.9331	51.383	51.4474	51.6588	51.2308	50.507	50.1235	50.2301	50.4769	50.1695	48.631	47.264	47.2626	47.6297	47.2605	46.299	45.8398	45.6841	45.2512	43.9285	42.842
17.4039	16.9992	16.8804	18.2094	19.6504	19.5606	19.0287	19.2243	18.5911	17.48	18.2044	19.3842	20.2809	24.1453	30.576	35.4074	37.855	40.2047	42.3599	43.2704	43.3277	42.7584	41.0646	40.2131	41.7512	44.098	45.9381	47.8315	49.7195	50.8537	51.3992	51.4309	51.6366	51.2168	50.5182	50.0958	50.2548	50.4472	50.0895	48.6284	47.2249	47.201	47.5614	47.1787	46.2531	45.795	45.643	45.1669	43.8941	42.819
17.8907	17.4366	17.2765	18.5953	19.999	19.9515	19.1849	19.3464	18.7155	17.4956	17.9913	18.9585	19.6682	23.0879	28.948	32.9802	34.8521	36.677	38.2033	38.8186	38.7236	38.0748	36.4021	35.5933	36.8501	38.8143	40.4501	42.0139	43.6377	44.6364	45.0052	45.0152	45.1414	44.6849	43.9764	43.5609	43.576	43.7305	43.3615	41.9773	40.8112	40.7033	40.9732	40.6138	39.821	39.3753	39.2179	38.8001	37.6346	36.6835
17.9575	17.4174	17.3261	18.6005	20.0205	19.957	19.2463	19.2798	18.6127	17.3812	17.9418	18.7947	19.4669	22.8072	28.3903	32.2165	33.892	35.5172	36.9063	37.4371	37.2401	36.5641	35.0159	34.1182	35.3261	37.247	38.7524	40.2485	41.7997	42.7069	43.026	43.014	43.081	42.6333	41.9348	41.4966	41.541	41.6801	41.3046	39.9404	38.8061	38.6548	38.9616	38.5544	37.739	37.306	37.1592	36.7326	35.5962	34.715
16.7309	16.3504	16.1623	17.3602	18.7655	18.5695	18.0859	18.1424	17.5038	16.4134	16.8714	17.7375	18.2767	21.4285	26.668	30.1938	31.7295	33.1102	34.414	34.8879	34.6959	34.067	32.6516	31.8775	32.9609	34.8171	36.2472	37.6843	39.1424	40.0495	40.3474	40.3373	40.4368	40.0479	39.4708	39.0655	39.0831	39.2293	38.9064	37.6741	36.5693	36.5368	36.715	36.4504	35.7247	35.3073	35.233	34.8758	33.8634	33.0833
18.0195	17.5952	17.3657	18.6983	20.1063	19.9185	19.2686	19.3353	18.5857	17.3291	17.7535	18.5795	19.235	22.4778	27.776	31.5573	32.9934	34.4116	35.6912	36.0983	35.8668	35.2273	33.6467	32.8083	33.9728	35.7462	37.1273	38.5924	40.0031	40.8436	41.144	41.1252	41.182	40.7523	40.1448	39.6962	39.7477	39.8406	39.4773	38.2302	37.1031	37.0355	37.2659	36.9287	36.1672	35.7334	35.642	35.2529	34.2294	33.3971
18.0148	17.5135	17.3409	18.5696	20.0312	19.8579	19.1682	19.1799	18.5154	17.1626	17.6444	18.4111	18.8981	21.8515	26.9997	30.3472	31.5647	32.7818	33.8149	34.0916	33.9016	33.2123	31.7616	30.937	31.9783	33.6243	34.9496	36.2954	37.5999	38.4826	38.6868	38.6545	38.7351	38.3066	37.7004	37.3401	37.3008	37.379	37.1323	35.927	34.8975	34.8327	35.0446	34.7701	34.0659	33.6617	33.5605	33.2431	32.2813	31.4914
17.9384	17.5039	17.336	18.5233	19.9883	19.8799	19.1626	19.1744	18.4396	17.0794	17.5305	18.3222	18.6312	21.5668	26.5776	29.7962	30.8729	31.9594	32.9474	33.2071	32.9844	32.2905	30.8595	30.1326	31.0907	32.7815	34.102	35.3796	36.7159	37.543	37.8201	37.8364	37.9483	37.5967	36.9984	36.6816	36.6911	36.8164	36.5401	35.4764	34.4496	34.4626	34.6706	34.4182	33.754	33.3933	33.3388	33.0611	32.1651	31.3847
17.7189	17.2492	17.0388	18.3432	19.7899	19.6211	18.8669	18.9303	18.2232	16.9441	17.2678	18.0696	18.4649	21.3513	26.2799	29.3464	30.5529	31.5678	32.5772	32.8277	32.5719	31.8904	30.5025	29.7851	30.7859	32.4636	33.767	35.0744	36.4878	37.2334	37.5204	37.5784	37.6841	37.32	36.7774	36.4427	36.4961	36.7081	36.4307	35.2946	34.322	34.3547	34.6327	34.3463	33.6887	33.3933	33.3434	33.0434	32.15	31.4266
17.7857	17.3501	17.1032	18.3586	19.6772	19.5551	18.9339	18.9247	18.2016	16.9649	17.4165	18.1211	18.6793	21.4611	26.3778	29.4928	30.6466	31.6822	32.6366	32.8864	32.6283	32.032	30.6443	29.8726	30.9298	32.5795	33.882	35.2372	36.55	37.3789	37.704	37.7486	37.8092	37.5072	36.9397	36.6427	36.7213	36.8028	36.5241	35.4422	34.5043	34.478	34.7388	34.49	33.8265	33.4993	33.4805	33.1388	32.2792	31.5353
17.528	17.0569	17.0091	18.127	19.5485	19.3624	18.6549	18.6362	17.969	16.7568	17.1291	17.948	18.2767	21.1601	26.0462	29.1092	30.2588	31.3388	32.3314	32.5738	32.3362	31.7289	30.3069	29.666	30.6396	32.301	33.5969	34.937	36.27	37.1407	37.4178	37.4164	37.5951	37.2753	36.7243	36.4093	36.4632	36.6595	36.404	35.2788	34.3299	34.3521	34.6099	34.3612	33.7419	33.4263	33.4211	33.1743	32.3007	31.6106
17.4086	16.98	16.7268	18.0035	19.4305	19.3018	18.5768	18.6972	17.877	16.6995	17.0944	17.8404	18.2067	21.0625	25.9105	29.043	30.1585	31.2514	32.2325	32.4669	32.2439	31.6519	30.2898	29.5543	30.5884	32.2221	33.5569	34.8581	36.1767	37.0454	37.353	37.4054	37.5201	37.1746	36.6796	36.3787	36.4302	36.6432	36.388	35.2472	34.3429	34.2878	34.6175	34.3513	33.7056	33.391	33.3845	33.1144	32.2383	31.5542
16.5257	16.086	15.8899	17.0669	18.3365	18.2336	17.6731	17.6708	16.925	15.815	16.1926	16.9749	17.3622	20.0783	24.7234	27.8119	28.885	29.8838	30.8027	31.1041	30.8655	30.3002	28.994	28.2857	29.279	30.8864	32.1268	33.4234	34.699	35.4759	35.7869	35.8187	35.9547	35.6346	35.1609	34.8395	34.8786	35.0445	34.8301	33.7952	32.869	32.8793	33.1947	32.9907	32.3612	32.0562	32.0479	31.7922	30.9963	30.3534
16.3491	15.9899	15.8305	17	18.2721	18.151	17.5839	17.6375	16.9033	15.7734	16.0934	16.7785	17.2178	19.875	24.4559	27.39	28.4809	29.5072	30.3591	30.6499	30.412	29.8903	28.5588	27.909	28.8572	30.5143	31.7368	32.9783	34.2868	35.1292	35.4034	35.5167	35.6238	35.3299	34.8868	34.5895	34.6232	34.8498	34.6407	33.5765	32.7909	32.7457	33.0684	32.8569	32.2862	32.0209	32.0182	31.8144	31.0049	30.389
16.2489	15.7688	15.6621	16.8559	18.0844	18.0023	17.3273	17.4156	16.8114	15.6381	15.9943	16.7083	17.0865	19.6757	24.1695	27.0901	28.1253	29.1126	29.9719	30.2063	30.0405	29.4902	28.2067	27.5688	28.5573	30.1126	31.3917	32.6756	33.8928	34.7269	35.0632	35.1269	35.3179	35.0113	34.5484	34.345	34.3925	34.6036	34.4032	33.3789	32.4836	32.5195	32.8384	32.6115	32.0831	31.849	31.8605	31.6569	30.9124	30.2509
15.8432	15.5044	15.3749	16.4648	17.6715	17.683	16.9312	17.0772	16.4165	15.2687	15.6128	16.32	16.7233	19.2568	23.7436	26.5739	27.5952	28.5643	29.404	29.6692	29.4666	28.9337	27.6664	27.0584	28.0062	29.6	30.7917	32.0345	33.255	34.1128	34.3747	34.4241	34.5783	34.2874	33.8604	33.6142	33.6675	33.8246	33.6616	32.6806	31.8482	31.8461	32.1536	31.9449	31.4229	31.1593	31.1385	30.9936	30.2257	29.615
15.49	15.2256	15.0629	16.192	17.4033	17.3526	16.6523	16.7387	16.1731	15.0033	15.3898	16.0346	16.487	19.0046	23.3554	26.1868	27.1459	28.1606	29.0225	29.2042	29.0387	28.4939	27.2947	26.6672	27.6136	29.1195	30.3616	31.5741	32.7236	33.5729	33.8454	33.908	34.0889	33.7479	33.3122	33.0947	33.1869	33.3106	33.1547	32.1562	31.304	31.3243	31.5369	31.3575	30.8184	30.5684	30.5947	30.3725	29.6338	29.002
14.7598	14.4854	14.2458	15.4355	16.631	16.5102	15.955	15.9509	15.3238	14.2749	14.6118	15.1972	15.5418	17.9228	21.9611	24.5408	25.4101	26.2235	26.971	27.1226	26.9506	26.4341	25.2263	24.6185	25.502	26.9385	28.0314	29.127	30.2582	31.0108	31.2506	31.3055	31.3947	31.1011	30.7056	30.4413	30.4681	30.6515	30.447	29.5316	28.7677	28.7617	29.0098	28.8817	28.3036	28.0965	28.1224	27.9367	27.2746	26.7344
14.5211	14.0721	13.9932	14.9723	16.1001	16.0972	15.5477	15.5847	15.01	13.9887	14.2749	14.8698	15.148	17.4226	21.3468	23.8259	24.4953	25.2927	26.0244	26.1393	25.9308	25.4452	24.2997	23.7752	24.5657	25.8837	27.0238	28.0865	29.1564	29.8541	30.1219	30.158	30.3269	30.0445	29.5952	29.3799	29.452	29.6047	29.4653	28.5856	27.786	27.8775	28.1278	27.94	27.4524	27.2631	27.2816	27.1492	26.5019	25.9667
13.2802	12.9281	12.7849	13.8247	14.8183	14.8198	14.3093	14.3309	13.7875	12.792	13.1104	13.6862	13.9315	16.0032	19.6622	21.9183	22.6528	23.3948	24.0153	24.2154	24.0349	23.5295	22.5149	21.9939	22.8101	24.0502	25.0061	26.0235	26.9969	27.697	27.8889	27.9014	28.0191	27.775	27.3969	27.2017	27.2358	27.3649	27.2164	26.3694	25.6377	25.6645	25.8787	25.7542	25.2883	25.0808	25.1155	25.0284	24.442	23.992
12.9509	12.5725	12.5125	13.4902	14.518	14.4068	13.9356	13.9314	13.4737	12.5734	12.8032	13.3073	13.6164	15.6331	19.1196	21.322	21.9966	22.6597	23.3258	23.3923	23.2508	22.7915	21.7398	21.26	22.0127	23.2074	24.1211	25.123	26.0351	26.6992	26.8763	26.9405	27.007	26.7967	26.4628	26.257	26.3405	26.4884	26.3974	25.6263	24.9268	24.968	25.1837	25.1148	24.7055	24.6218	24.7522	24.7733	24.4097	24.1154
11.4188	11.1642	11.1209	11.9669	12.9734	12.9973	12.5298	12.6331	12.2674	11.4183	11.6982	12.1237	12.3649	14.2544	17.5217	19.4667	20.0668	20.6925	21.1924	21.3482	21.1755	20.7342	19.8377	19.3863	20.0816	21.1496	22.0984	22.9353	23.8134	24.4309	24.6298	24.6949	24.8132	24.6222	24.34	24.1843	24.2973	24.4407	24.3646	23.6368	23.0363	23.1097	23.3238	23.271	22.9621	22.8938	23.0477	23.176	22.8771	22.7494
6.77497	6.57399	6.64413	7.24259	7.86777	7.90958	7.73232	7.73411	7.45298	6.95918	7.10465	7.50172	7.64777	8.69084	10.6855	11.8887	12.3445	12.872	13.5177	14.0452	14.3884	14.5822	14.2901	14.278	14.9342	15.8192	16.5503	17.194	17.8016	18.076	18.1332	18.0679	18.1317	18.0399	17.8123	17.7995	17.8849	18.027	17.9273	17.4679	17.0314	17.0669	17.3193	17.338	17.3013	17.5169	17.9912	18.4997	18.768	19.1785
2.33633	2.19048	2.21189	2.50284	2.75141	2.72279	2.65592	2.71304	2.7251	2.5729	2.60529	2.83763	2.99624	3.57461	4.4033	5.05701	5.45937	6.07578	6.86315	7.66148	8.53138	9.22272	9.49557	9.8599	10.4721	11.2256	11.8349	12.3226	12.6401	12.7295	12.6249	12.5308	12.4484	12.3073	12.1459	12.0649	12.126	12.1029	11.9783	11.5784	11.2089	11.1964	11.2795	11.1746	11.0626	11.1136	11.3148	11.4741	11.4861	11.5808
1.2326	1.24424	1.26442	1.40581	1.60363	1.67524	1.56783	1.67831	1.65466	1.60384	1.69163	1.82347	1.98165	2.29974	2.85361	3.29223	3.64124	4.14348	4.76814	5.49682	6.18601	6.78545	7.07781	7.37716	7.90967	8.52199	8.98024	9.34105	9.64741	9.7235	9.65793	9.59399	9.55801	9.43363	9.33405	9.28457	9.27061	9.28535	9.18109	8.86704	8.61337	8.54503	8.58765	8.52154	8.42094	8.45948	8.61405	8.74183	8.73501	8.86232
1.14669	1.13609	1.17033	1.31318	1.44542	1.40544	1.37259	1.47026	1.43558	1.38011	1.46369	1.5615	1.68409	2.03946	2.55213	2.98535	3.26627	3.68558	4.203	4.77267	5.31232	5.7804	6.02527	6.26899	6.72342	7.25653	7.65011	7.97884	8.24491	8.33129	8.31595	8.2447	8.22894	8.13674	8.03633	7.98844	7.95104	7.98016	7.8779	7.59558	7.35173	7.28944	7.31145	7.24028	7.12605	7.067	7.14258	7.1335	7.04423	7.02773
2.23903	2.23469	2.24292	2.46423	2.67219	2.69732	2.63597	2.70333	2.61922	2.47865	2.58758	2.71165	2.82868	3.29926	4.10249	4.6278	4.8268	5.02025	5.19355	5.27692	5.26954	5.20592	5.0181	4.9535	5.18559	5.5394	5.84962	6.18663	6.53082	6.77405	6.90202	6.97535	7.02494	6.99056	6.91496	6.8671	6.87349	6.88382	6.8241	6.59433	6.38338	6.3236	6.33637	6.25577	6.09416	6.00478	5.97328	5.91436	5.76232	5.65492
3.74125	3.68505	3.67039	3.97982	4.30792	4.29548	4.20491	4.22491	4.08519	3.84709	3.96514	4.15017	4.29241	5.00229	6.16296	6.93642	7.21882	7.4973	7.7473	7.81478	7.76121	7.62537	7.32123	7.20144	7.50385	7.98221	8.42424	8.8996	9.37406	9.73712	9.90325	9.97796	10.0494	9.96376	9.81106	9.71358	9.67672	9.66124	9.50583	9.13987	8.78232	8.66128	8.61584	8.42921	8.14349	7.93636	7.80005	7.60532	7.29705	7.01204
2.83085	2.80666	2.83842	3.08822	3.36938	3.3966	3.33327	3.35247	3.28323	3.09392	3.19212	3.39582	3.52882	4.14518	5.15392	5.82396	6.07372	6.33221	6.56402	6.63436	6.62363	6.51721	6.28091	6.21781	6.52485	6.98537	7.42665	7.92977	8.43236	8.83589	9.06822	9.18801	9.30703	9.27619	9.16429	9.09816	9.10344	9.10806	8.99096	8.63326	8.26998	8.16457	8.10283	7.91001	7.62964	7.42374	7.26995	7.06736	6.7401	6.44618
1.20573	1.21212	1.24876	1.41181	1.57276	1.61399	1.6165	1.68109	1.65633	1.63053	1.74395	1.87192	2.02134	2.45028	3.12172	3.60165	3.83929	4.06829	4.28861	4.40179	4.42147	4.41703	4.32557	4.35263	4.65647	5.06931	5.49771	6.0003	6.53924	6.94807	7.23211	7.41733	7.57061	7.59149	7.53935	7.4978	7.51337	7.51613	7.40033	7.07261	6.75771	6.60826	6.52591	6.31339	6.03371	5.81173	5.62769	5.39747	5.07137	4.78155
1.0005	1.03428	1.04448	1.15321	1.28181	1.33868	1.35153	1.38704	1.36963	1.33525	1.44044	1.55381	1.65814	2.01105	2.55172	2.93992	3.11037	3.2888	3.44584	3.53802	3.54971	3.53808	3.46739	3.48019	3.71405	4.04352	4.38386	4.77101	5.16979	5.50558	5.72137	5.85048	5.96419	5.98925	5.93608	5.9141	5.93016	5.93434	5.83837	5.58705	5.33396	5.23187	5.18274	5.03523	4.82285	4.65938	4.50924	4.34651	4.09952	3.86844
0.831071	0.839613	0.883534	1.00396	1.10349	1.14321	1.19393	1.2303	1.26144	1.2598	1.38718	1.53744	1.68112	2.09747	2.70718	3.16486	3.38998	3.62771	3.85769	3.96223	4.03331	4.05738	3.99489	4.04339	4.35472	4.78529	5.24081	5.77263	6.30916	6.75486	7.0485	7.25124	7.40379	7.4203	7.38133	7.34012	7.35477	7.33286	7.19491	6.86904	6.53441	6.38657	6.26308	6.04698	5.76228	5.52453	5.3158	5.0564	4.72805	4.41966
0.401524	0.395014	0.413073	0.484188	0.539027	0.562315	0.580303	0.635262	0.66099	0.674443	0.750427	0.840395	0.960194	1.22409	1.62277	1.919	2.09376	2.29241	2.45825	2.55201	2.60748	2.63304	2.608	2.66486	2.8844	3.1742	3.5044	3.88958	4.29744	4.62221	4.84449	5.00289	5.11266	5.13956	5.09354	5.05279	5.05685	5.03423	4.92534	4.67727	4.43819	4.31364	4.20474	4.03215	3.79939	3.6206	3.45933	3.26727	3.02489	2.78903
0.420905	0.428819	0.434958	0.48783	0.540348	0.557153	0.566285	0.597119	0.606378	0.597381	0.658282	0.722522	0.79844	0.982648	1.25702	1.46996	1.59115	1.70955	1.81299	1.87256	1.8988	1.90228	1.8807	1.91051	2.05301	2.26265	2.48477	2.7464	3.0188	3.24145	3.39025	3.49248	3.56808	3.57704	3.54908	3.51898	3.51227	3.49905	3.42472	3.24413	3.082	2.98927	2.91547	2.80137	2.64537	2.5192	2.40656	2.28085	2.10922	1.96298
0.547382	0.553186	0.580429	0.644149	0.707274	0.727155	0.736428	0.773272	0.761901	0.757379	0.8057	0.893273	0.974021	1.18905	1.52789	1.77859	1.90833	2.03076	2.15278	2.21492	2.24148	2.24144	2.20985	2.23859	2.40657	2.64463	2.90012	3.18934	3.51007	3.75625	3.93467	4.04736	4.13217	4.14932	4.11578	4.09064	4.09275	4.08335	3.99562	3.80476	3.61875	3.51843	3.44554	3.31406	3.14138	2.99915	2.87154	2.72841	2.54107	2.36724
0.747837	0.755659	0.799565	0.896961	0.995539	1.03756	1.04324	1.09715	1.08647	1.07933	1.16557	1.27045	1.38207	1.69538	2.17137	2.51965	2.70473	2.88631	3.05525	3.15051	3.17794	3.18996	3.1429	3.17756	3.4133	3.7419	4.09273	4.50036	4.9278	5.26955	5.5136	5.67255	5.79282	5.82283	5.77674	5.75144	5.76213	5.75677	5.65027	5.38781	5.13916	5.01273	4.92233	4.75579	4.52786	4.3369	4.18221	3.98595	3.72225	3.48405
0.474001	0.493706	0.523479	0.590756	0.658336	0.6893	0.721785	0.767724	0.791653	0.804208	0.893655	1.01783	1.13538	1.44018	1.88778	2.22977	2.44128	2.64305	2.82601	2.94275	2.99955	3.03063	3.01087	3.0764	3.33741	3.69446	4.08211	4.53438	5.00914	5.40586	5.68067	5.86609	6.01526	6.04574	6.01237	5.98309	5.98251	5.96066	5.83168	5.54493	5.26155	5.10654	4.98582	4.78244	4.52332	4.2957	4.09481	3.86561	3.56781	3.29578
0.467439	0.47448	0.485099	0.556662	0.619454	0.65764	0.684828	0.741371	0.764605	0.783395	0.875073	0.986836	1.11569	1.41934	1.85858	2.20448	2.39805	2.60125	2.7808	2.89799	2.94863	2.9738	2.95372	3.02112	3.27736	3.62484	4.0021	4.44344	4.90868	5.29668	5.55916	5.73397	5.8672	5.88922	5.84351	5.80874	5.80126	5.77266	5.64561	5.35488	5.07536	4.91731	4.79881	4.5978	4.33985	4.12591	3.92773	3.70339	3.4131	3.14151
0.53903	0.551985	0.578572	0.656371	0.742804	0.771893	0.805462	0.86551	0.905928	0.926482	1.03983	1.19267	1.34652	1.72588	2.27595	2.68443	2.92817	3.18757	3.41835	3.56068	3.63528	3.67323	3.65664	3.74714	4.06586	4.496	4.96657	5.52774	6.09958	6.57309	6.90756	7.1289	7.30853	7.34088	7.28946	7.2556	7.25643	7.229	7.07418	6.72185	6.37867	6.19731	6.05606	5.80813	5.50053	5.22912	4.99591	4.71136	4.35562	4.0201
0.610025	0.612666	0.660284	0.72842	0.820568	0.874445	0.908663	0.974393	1.00397	1.02925	1.16	1.32191	1.49037	1.90941	2.5308	2.99044	3.26879	3.54832	3.80159	3.95682	4.03882	4.08414	4.05853	4.15511	4.50324	4.98086	5.5063	6.11154	6.74444	7.2725	7.6393	7.87732	8.07282	8.09903	8.0439	7.99917	7.99036	7.95598	7.78913	7.39579	7.00949	6.79972	6.63698	6.36202	6.01407	5.71202	5.43918	5.13092	4.73069	4.35925
0.602269	0.618675	0.63057	0.714267	0.807831	0.828331	0.875192	0.927233	0.959346	0.97201	1.08195	1.21431	1.36347	1.7086	2.23072	2.6282	2.84978	3.07497	3.28131	3.41304	3.46874	3.49869	3.47174	3.53814	3.82812	4.22029	4.64247	5.13885	5.65303	6.07218	6.36752	6.55892	6.70447	6.72737	6.67102	6.62942	6.62685	6.60176	6.46193	6.1441	5.83736	5.67329	5.55032	5.3385	5.05258	4.8195	4.60634	4.35753	4.04136	3.74946
0.738888	0.74124	0.792136	0.884739	0.975427	1.04032	1.06765	1.13668	1.18181	1.18339	1.32043	1.48798	1.65173	2.08479	2.7197	3.19881	3.47082	3.74714	3.99515	4.13853	4.21368	4.24595	4.20309	4.28664	4.62699	5.09484	5.60694	6.19612	6.80731	7.31584	7.66124	7.89173	8.07386	8.10252	8.03236	7.98875	7.98281	7.95396	7.79379	7.41456	7.03911	6.85048	6.69763	6.43977	6.10596	5.81913	5.57056	5.27705	4.89509	4.53915
0.695934	0.713002	0.753138	0.841638	0.94526	0.987321	1.01954	1.10408	1.13583	1.14892	1.29131	1.46576	1.63368	2.07259	2.70933	3.19533	3.48011	3.76409	4.01635	4.17928	4.25308	4.29347	4.26238	4.34861	4.70532	5.18541	5.70882	6.31695	6.95119	7.47597	7.83709	8.07807	8.26676	8.29922	8.24142	8.19887	8.20422	8.1778	8.01088	7.61648	7.2419	7.04422	6.89506	6.63122	6.28611	5.9957	5.74164	5.43317	5.03231	4.66807
0.70011	0.70459	0.737662	0.833919	0.926489	0.980438	1.00908	1.08674	1.11014	1.14046	1.26901	1.42366	1.58938	1.99989	2.61323	3.07893	3.34111	3.61384	3.86517	4.00492	4.08654	4.11799	4.08665	4.16574	4.49745	4.96238	5.45349	6.03713	6.63329	7.12031	7.45974	7.68104	7.85594	7.88835	7.83169	7.78315	7.79229	7.76562	7.60239	7.24427	6.87766	6.68823	6.55011	6.29882	5.97871	5.70349	5.45775	5.17196	4.79904	4.45548
0.704286	0.709998	0.737662	0.832632	0.925819	0.962543	0.995129	1.05553	1.06889	1.08713	1.19097	1.33009	1.48709	1.85399	2.4102	2.82828	3.06191	3.30129	3.52114	3.64585	3.70606	3.73721	3.6979	3.76628	4.06434	4.46827	4.90343	5.41231	5.93788	6.36664	6.66454	6.85197	7.00129	7.02714	6.97132	6.93018	6.93374	6.90608	6.76338	6.4389	6.12608	5.95731	5.83241	5.61172	5.32824	5.09435	4.88452	4.63677	4.31284	4.01592
0.867752	0.883031	0.930798	1.05328	1.17654	1.25024	1.30055	1.39744	1.45161	1.47932	1.66729	1.89615	2.14948	2.72839	3.60248	4.26158	4.65389	5.04328	5.39919	5.61355	5.72342	5.77403	5.73667	5.86263	6.35334	7.0109	7.7337	8.57394	9.45029	10.173	10.6702	11.0007	11.2586	11.3018	11.2109	11.1506	11.1451	11.0871	10.8537	10.3145	9.78211	9.50173	9.28382	8.91091	8.43156	8.0291	7.65781	7.22923	6.68139	6.17946
1.03778	1.06387	1.11527	1.24948	1.4152	1.51247	1.57738	1.71507	1.78429	1.82793	2.09282	2.39437	2.7167	3.50924	4.6737	5.55582	6.09476	6.62938	7.10133	7.40121	7.54926	7.62418	7.58963	7.77155	8.42989	9.3231	10.3108	11.4535	12.6594	13.6539	14.3391	14.7912	15.1471	15.205	15.0796	14.9789	14.9569	14.8745	14.5325	13.7866	13.0492	12.6535	12.3246	11.8024	11.1229	10.548	10.023	9.42959	8.66976	7.96986
1.28448	1.30704	1.37999	1.56362	1.77119	1.8948	1.95539	2.15268	2.22162	2.25361	2.57272	2.92216	3.34066	4.27126	5.66645	6.71759	7.3667	7.9906	8.55051	8.901	9.08327	9.17892	9.12315	9.33637	10.1068	11.1804	12.3377	13.6851	15.1066	16.2588	17.0668	17.6063	18.0357	18.1071	17.9805	17.8974	17.8825	17.817	17.4377	16.5677	15.7311	15.2695	14.9204	14.3064	13.5431	12.8718	12.2887	11.6095	10.7179	9.90251
1.26181	1.277	1.33914	1.51602	1.72024	1.79431	1.87729	2.01259	2.09585	2.16906	2.45627	2.78299	3.14703	4.01809	5.32445	6.33311	6.89961	7.48374	8.01362	8.33451	8.50872	8.58818	8.52659	8.71606	9.44904	10.4306	11.5095	12.7547	14.0534	15.1399	15.872	16.3668	16.765	16.8339	16.7164	16.6186	16.622	16.5605	16.2105	15.4121	14.6107	14.206	13.876	13.3355	12.6194	12.0032	11.4667	10.8314	10.0146	9.25925
1.34414	1.36352	1.45304	1.64725	1.85968	1.97877	2.04744	2.23729	2.296	2.36808	2.6743	3.07537	3.48068	4.48579	5.94909	7.08638	7.75379	8.41311	9.03018	9.39401	9.58801	9.69759	9.6207	9.85279	10.6767	11.8088	13.0447	14.4693	15.9679	17.1885	18.0564	18.6111	19.0735	19.1538	19.0049	18.915	18.9096	18.8388	18.4407	17.5321	16.623	16.1485	15.7777	15.1379	14.3296	13.6252	12.997	12.2717	11.3367	10.4652
1.33698	1.38755	1.43942	1.62152	1.83823	1.94849	2.01676	2.19845	2.30277	2.34987	2.66934	3.05081	3.44021	4.43394	5.87184	6.98001	7.6261	8.28056	8.88606	9.25172	9.43044	9.5305	9.47278	9.69726	10.514	11.6264	12.8215	14.2187	15.6873	16.9013	17.7263	18.2837	18.7343	18.8149	18.6832	18.5781	18.5862	18.5176	18.1386	17.2403	16.3593	15.8928	15.5338	14.9241	14.115	13.4251	12.8205	12.1186	11.2049	10.3439
1.61738	1.68195	1.73903	1.97276	2.21364	2.33805	2.40725	2.59098	2.68549	2.70499	3.03231	3.43091	3.83075	4.91079	6.45125	7.61035	8.29037	8.95536	9.59108	9.95917	10.1536	10.2393	10.1733	10.3777	11.2217	12.4002	13.6422	15.0874	16.6089	17.8469	18.7024	19.2809	19.7457	19.8169	19.6852	19.5853	19.5982	19.5537	19.1517	18.2245	17.3104	16.8676	16.4967	15.8857	15.0622	14.355	13.7459	13.0226	12.0734	11.2
1.43721	1.46446	1.53351	1.75532	1.98571	2.10404	2.22176	2.39818	2.47857	2.5697	2.92206	3.35372	3.81434	4.9118	6.53228	7.76641	8.52149	9.24607	9.93017	10.3486	10.5655	10.6722	10.6225	10.8832	11.7911	13.0638	14.4223	16.0172	17.6957	19.0756	20.0336	20.683	21.1853	21.2794	21.1381	21.0356	21.0249	20.9583	20.5015	19.4828	18.4751	17.9342	17.5107	16.7952	15.8717	15.0812	14.3874	13.565	12.5169	11.5373
1.58158	1.63749	1.71427	1.96632	2.25253	2.3876	2.50487	2.7172	2.80855	2.90011	3.31105	3.7806	4.32194	5.58692	7.41224	8.85272	9.68841	10.543	11.3162	11.7909	12.0419	12.1748	12.1103	12.4088	13.4619	14.9071	16.4594	18.3015	20.2123	21.8091	22.9147	23.6438	24.2139	24.333	24.1692	24.0266	24.0231	23.9149	23.3987	22.2167	21.0628	20.4358	19.943	19.1235	18.0546	17.1458	16.3301	15.3752	14.1662	13.0451
1.81306	1.85498	1.96559	2.21592	2.51666	2.66979	2.76148	2.996	3.13041	3.18108	3.59597	4.11392	4.64904	5.98548	7.9323	9.40982	10.288	11.1673	11.9661	12.4576	12.7202	12.8513	12.7631	13.0765	14.1563	15.6612	17.2844	19.1562	21.1288	22.7566	23.8894	24.6362	25.2427	25.3329	25.1558	25.0393	25.0234	24.9374	24.4244	23.2161	22.0354	21.4105	20.9198	20.0857	19.0249	18.1004	17.2795	16.3213	15.0826	13.9498
1.79994	1.81893	1.9235	2.18504	2.4523	2.61473	2.73917	2.95716	3.0655	3.15506	3.56872	4.08819	4.65998	5.97125	7.93513	9.43162	10.3284	11.2208	12.0389	12.5378	12.8009	12.9507	12.878	13.184	14.28	15.8097	17.4582	19.3718	21.3796	23.0544	24.2148	24.9848	25.6021	25.7074	25.5165	25.3762	25.3845	25.2708	24.7299	23.5152	22.2932	21.6534	21.1592	20.3063	19.1881	18.2476	17.4091	16.4245	15.1698	14.0016
1.72119	1.78889	1.8715	2.13101	2.4161	2.55554	2.69454	2.93913	3.05333	3.13555	3.58606	4.12795	4.73437	6.10342	8.12921	9.69753	10.6258	11.5514	12.4133	12.9373	13.2186	13.3743	13.3077	13.6463	14.8134	16.4086	18.1402	20.1807	22.2967	24.0694	25.2955	26.0877	26.7518	26.8569	26.6681	26.5153	26.5126	26.4015	25.8223	24.5291	23.2372	22.5588	22.009	21.0838	19.9135	18.8938	17.9752	16.9342	15.5917	14.3499
1.95982	2.01119	2.10797	2.39089	2.69632	2.83635	2.92604	3.14441	3.24131	3.30986	3.69508	4.18409	4.71249	5.9926	7.88425	9.34094	10.1806	11.0445	11.8503	12.3167	12.5614	12.6891	12.5937	12.8638	13.9173	15.3476	16.8813	18.6697	20.5345	22.0539	23.1077	23.8154	24.3835	24.4741	24.3146	24.2023	24.2236	24.1516	23.6735	22.5534	21.4371	20.9068	20.4737	19.7152	18.7226	17.878	17.1367	16.2614	15.0934	14.0225
1.79994	1.84897	1.95693	2.2275	2.52738	2.66704	2.79913	3.03345	3.16017	3.24612	3.69012	4.2297	4.80985	6.18171	8.21023	9.78384	10.7163	11.6621	12.5376	13.0615	13.3518	13.5165	13.4446	13.7624	14.9243	16.5127	18.2377	20.2322	22.3329	24.0615	25.2733	26.0685	26.7129	26.8289	26.6555	26.5049	26.5139	26.4151	25.845	24.5765	23.3277	22.6623	22.1341	21.2524	20.1015	19.1215	18.242	17.2087	15.9017	14.683
1.90613	1.95832	2.04854	2.3227	2.65342	2.82947	2.93302	3.17492	3.32516	3.39961	3.88709	4.44489	5.0538	6.52028	8.6455	10.3052	11.2869	12.2842	13.2031	13.779	14.0897	14.2427	14.1701	14.5151	15.7436	17.4177	19.2353	21.3356	23.5494	25.3862	26.6422	27.5022	28.1782	28.297	28.1113	27.9844	27.9715	27.8792	27.2989	25.9474	24.6231	23.9326	23.3932	22.4642	21.2671	20.2274	19.3187	18.2502	16.852	15.5778
1.67407	1.71527	1.77945	2.0491	2.35983	2.48189	2.50223	2.77685	2.92048	3.01391	3.44826	3.93565	4.46276	5.79936	7.71318	9.15446	10.0625	10.9428	11.7547	12.3001	12.5632	12.7015	12.6303	12.9448	14.0311	15.5196	17.1223	18.9719	20.9296	22.5511	23.6448	24.4087	25.0078	25.1291	24.9794	24.8353	24.8377	24.7651	24.2538	23.0599	21.8938	21.3091	20.8429	20.0529	18.9916	18.0974	17.3023	16.3553	15.1333	14.0073
1.69794	1.75613	1.85373	2.10571	2.39469	2.49015	2.62216	2.84897	3.00433	3.06073	3.48047	3.97073	4.56122	5.8807	7.79986	9.31488	10.1837	11.1039	11.9243	12.443	12.7156	12.8667	12.7721	13.0687	14.1982	15.6823	17.291	19.1589	21.1202	22.7417	23.8716	24.6215	25.2135	25.3303	25.1822	25.0493	25.0848	24.9869	24.4765	23.297	22.123	21.5237	21.0527	20.2338	19.173	18.2692	17.452	16.5328	15.313	14.1653
1.83873	1.91715	2.0023	2.31156	2.60921	2.72141	2.86204	3.11528	3.24234	3.26886	3.76044	4.29586	4.86534	6.27519	8.30108	9.86239	10.8367	11.7983	12.6406	13.1979	13.4907	13.6407	13.5838	13.8938	15.0382	16.6323	18.3586	20.3214	22.3866	24.0929	25.2581	26.0764	26.6997	26.8368	26.6799	26.5357	26.5857	26.5017	25.9624	24.7147	23.4836	22.8461	22.344	21.499	20.3881	19.4357	18.599	17.5954	16.3172	15.1213
1.84351	1.86908	1.95278	2.22922	2.52876	2.68287	2.7672	3.00709	3.15579	3.22464	3.66877	4.18827	4.76469	6.11658	8.12584	9.63223	10.5474	11.4669	12.3524	12.896	13.1473	13.3015	13.2415	13.5377	14.6785	16.222	17.8711	19.7986	21.8266	23.4656	24.6033	25.3654	25.9824	26.1157	25.9751	25.8425	25.8634	25.7971	25.2875	24.077	22.856	22.2562	21.7855	20.9513	19.8657	18.939	18.1329	17.1839	15.9265	14.7364
1.85305	1.8835	1.99735	2.24466	2.60385	2.70765	2.84809	3.0598	3.18825	3.27667	3.72823	4.25376	4.80189	6.23249	8.2389	9.79439	10.7268	11.6582	12.5248	13.0884	13.3497	13.5065	13.4273	13.7151	14.8395	16.4216	18.1098	20.0746	22.1261	23.8176	24.9571	25.7072	26.3605	26.4902	26.3303	26.187	26.2232	26.169	25.6356	24.3893	23.1711	22.5634	22.0875	21.2437	20.1511	19.2109	18.4071	17.4412	16.1482	14.9654
1.70271	1.74171	1.8364	2.08512	2.35983	2.49841	2.58869	2.87116	2.97728	2.98789	3.46561	3.94267	4.48026	5.77699	7.63593	9.09518	9.99139	10.8659	11.6643	12.2012	12.4607	12.607	12.5349	12.8172	13.8702	15.3175	16.9122	18.701	20.6341	22.1912	23.2776	24.0326	24.6171	24.6972	24.5627	24.463	24.4752	24.408	23.919	22.7542	21.6334	21.0559	20.5927	19.8274	18.7764	17.9255	17.1504	16.2389	15.0321	13.9404
1.60964	1.62395	1.73735	1.9436	2.2767	2.40756	2.47712	2.73801	2.83663	2.89944	3.31943	3.77191	4.24397	5.52077	7.32314	8.73598	9.55178	10.3915	11.1755	11.6735	11.9098	12.0443	11.986	12.2594	13.2789	14.6768	16.1759	17.9188	19.7397	21.2423	22.2609	22.9592	23.5133	23.6365	23.5083	23.3697	23.3973	23.3314	22.8679	21.7687	20.6842	20.1242	19.7007	18.9637	17.9663	17.1393	16.4192	15.5268	14.4058	13.3526
1.76237	1.809	1.92306	2.17261	2.50463	2.63056	2.70305	2.96826	3.06654	3.11277	3.57462	4.13213	4.66405	6.04947	8.03917	9.56597	10.4779	11.4007	12.2492	12.7984	13.0692	13.227	13.162	13.4587	14.5834	16.1456	17.8111	19.7579	21.8137	23.4934	24.6371	25.4272	26.0296	26.1381	25.9723	25.8508	25.8648	25.8092	25.2595	24.0441	22.8221	22.1984	21.6958	20.8571	19.7569	18.806	17.9992	17.0097	15.7145	14.568
1.60964	1.67682	1.76212	2.04395	2.3062	2.42683	2.54127	2.75465	2.91778	2.93326	3.36898	3.88419	4.37087	5.70988	7.54925	8.97312	9.84108	10.7168	11.5202	12.0222	12.2929	12.4083	12.3589	12.6288	13.6946	15.1413	16.721	18.5178	20.4397	21.9979	23.0791	23.8253	24.3877	24.4778	24.3445	24.2227	24.228	24.1551	23.6589	22.5065	21.3795	20.8002	20.3274	19.5672	18.5237	17.6183	16.8876	15.9638	14.7846	13.6841
1.6526	1.70086	1.74478	2.03366	2.3196	2.47088	2.56359	2.82678	2.92048	2.99049	3.36155	3.85378	4.38181	5.58991	7.40416	8.83886	9.63744	10.4653	11.2814	11.7697	12.0149	12.176	12.0924	12.3591	13.4094	14.8099	16.2884	18.0409	19.8745	21.3773	22.3946	23.0882	23.6342	23.7861	23.6271	23.5031	23.5305	23.4869	22.9986	21.9017	20.8066	20.254	19.8232	19.0727	18.08	17.2805	16.5323	15.6687	14.5252	13.4781
1.52135	1.53984	1.6185	1.85354	2.10776	2.20934	2.35161	2.52718	2.63648	2.70952	3.11378	3.58245	4.08644	5.27675	7.04992	8.41689	9.24631	10.0721	10.8689	11.3381	11.6075	11.7449	11.6816	11.9532	12.9534	14.3268	15.8184	17.5397	19.3522	20.832	21.887	22.5708	23.1184	23.234	23.0594	22.9502	22.9428	22.8539	22.3877	21.3115	20.2077	19.6705	19.2256	18.4854	17.5117	16.6802	15.9188	15.042	13.9225	12.885
1.38532	1.44611	1.51698	1.72231	1.96564	2.09371	2.09779	2.29416	2.43633	2.5118	2.85611	3.25732	3.69917	4.79685	6.332	7.52587	8.25557	8.98762	9.66512	10.0875	10.3226	10.4193	10.354	10.6081	11.4684	12.6991	13.9882	15.4971	17.063	18.3533	19.2138	19.8049	20.3115	20.3831	20.2444	20.1593	20.1567	20.088	19.6866	18.7264	17.773	17.3046	16.9208	16.2624	15.4165	14.6839	14.0544	13.305	12.3006	11.4029
1.54521	1.55185	1.63088	1.89471	2.1748	2.27266	2.41018	2.60485	2.73926	2.81619	3.21784	3.67367	4.22646	5.48823	7.26096	8.69064	9.55178	10.39	11.2051	11.6895	11.9636	12.1225	12.0594	12.3311	13.3972	14.8111	16.3484	18.1235	20.0042	21.5348	22.6079	23.323	23.89	23.9859	23.8271	23.7115	23.7364	23.6736	23.18	22.0309	20.916	20.3131	19.8877	19.0888	18.057	17.2063	16.4398	15.5168	14.3369	13.2846
1.59294	1.59992	1.69526	1.95132	2.18016	2.30294	2.43249	2.60485	2.78795	2.89163	3.27235	3.76724	4.30523	5.54314	7.43431	8.82491	9.65845	10.5451	11.3507	11.8418	12.1173	12.253	12.1804	12.4879	13.5252	14.9553	16.5184	18.3207	20.2245	21.8008	22.855	23.592	24.1723	24.2947	24.1054	23.9963	24.0152	23.9306	23.4454	22.2601	21.1465	20.5791	20.1202	19.3206	18.3	17.4371	16.6386	15.743	14.5521	13.4446
1.59055	1.63597	1.75716	2.00278	2.22843	2.37177	2.42971	2.65756	2.79336	2.85781	3.25005	3.74151	4.27022	5.55737	7.36271	8.79701	9.64552	10.4969	11.2913	11.8057	12.0956	12.2107	12.1437	12.4344	13.4703	14.8961	16.4559	18.2304	20.0923	21.6592	22.7227	23.4465	24.0152	24.1187	23.9642	23.8532	23.8724	23.7913	23.292	22.1284	21.0163	20.4442	19.9698	19.1991	18.184	17.2993	16.5563	15.6477	14.4391	13.3745
1.44737	1.5086	1.58879	1.74547	2.02464	2.14051	2.22609	2.42176	2.46879	2.53521	2.87593	3.32983	3.76262	4.80905	6.4168	7.61131	8.34123	9.03884	9.72164	10.1169	10.3649	10.4814	10.3956	10.6421	11.5294	12.7238	14.0357	15.4996	17.0916	18.3864	19.2651	19.8694	20.3032	20.3971	20.2472	20.1634	20.143	20.0826	19.6933	18.7343	17.8133	17.3303	16.96	16.307	15.4527	14.7262	14.0978	13.3649	12.3856	11.4793
1.20396	1.2106	1.28918	1.47529	1.69481	1.76334	1.83002	2.01952	2.0739	2.09294	2.38041	2.72869	3.04279	3.88992	5.13925	6.0856	6.66681	7.23735	7.75211	8.10749	8.26134	8.35825	8.29051	8.47562	9.14713	10.1054	11.1029	12.2791	13.5062	14.4586	15.1649	15.6061	15.9587	16.0131	15.8954	15.8138	15.7902	15.768	15.4516	14.7039	13.9906	13.5918	13.3197	12.8188	12.1774	11.6117	11.1457	10.5698	9.79081	9.11858
1.61919	1.63356	1.72993	1.93588	2.1748	2.30845	2.37671	2.59931	2.65812	2.74074	3.11378	3.49123	3.93984	5.03884	6.61088	7.83276	8.54325	9.25875	9.96182	10.3761	10.6031	10.7075	10.6328	10.8475	11.7391	12.9258	14.2232	15.7209	17.2769	18.5505	19.4474	20.0355	20.4951	20.5676	20.443	20.3426	20.3489	20.3044	19.8934	18.9227	18.0203	17.5346	17.1938	16.5734	15.726	15.024	14.4154	13.6855	12.7204	11.8307
1.52135	1.54224	1.64574	1.80722	2.04341	2.18732	2.22609	2.40512	2.47961	2.54042	2.84125	3.28539	3.67073	4.62807	6.13792	7.25037	7.91131	8.5719	9.17345	9.5745	9.77428	9.8739	9.78314	9.98477	10.8003	11.9093	13.0956	14.4503	15.8835	17.0498	17.8624	18.365	18.8143	18.878	18.7383	18.6687	18.6435	18.5894	18.2594	17.3798	16.5113	16.0695	15.7659	15.162	14.4202	13.7728	13.2101	12.5441	11.6452	10.8308
1.28032	1.27308	1.38079	1.54219	1.71626	1.87897	1.91928	2.08333	2.14693	2.13457	2.4151	2.76144	3.11062	3.94686	5.24854	6.22858	6.79935	7.394	7.91317	8.27717	8.45862	8.54584	8.46287	8.62386	9.35317	10.3062	11.343	12.531	13.7538	14.8159	15.4903	15.9712	16.3229	16.3918	16.2701	16.1806	16.1939	16.1089	15.8064	15.0253	14.2862	13.9092	13.5977	13.0977	12.4386	11.8695	11.3548	10.7672	10.0039	9.2828
1.11566	1.12408	1.17033	1.34148	1.48297	1.58439	1.64035	1.75044	1.8494	1.87181	2.14008	2.46672	2.75618	3.48119	4.66441	5.53983	6.02032	6.5294	7.04002	7.31521	7.4722	7.54203	7.48612	7.65421	8.26323	9.1307	10.0403	11.0899	12.1802	13.1008	13.7109	14.0962	14.4211	14.4772	14.3823	14.2774	14.2756	14.2356	13.9523	13.2769	12.5975	12.2681	12.0005	11.5314	10.9357	10.4193	9.9964	9.48166	8.80605	8.17409
0.984413	0.99911	1.06385	1.21797	1.39716	1.47152	1.50926	1.65057	1.68982	1.66108	1.93939	2.23047	2.51988	3.22701	4.30828	5.13006	5.60172	6.11368	6.55117	6.86361	7.03408	7.09852	7.05214	7.19733	7.77434	8.57005	9.42403	10.4362	11.4867	12.3597	12.9238	13.322	13.6245	13.6583	13.5586	13.4869	13.4888	13.4187	13.1467	12.4877	11.8853	11.5394	11.2677	10.8598	10.2768	9.81312	9.39205	8.88603	8.23348	7.64903
0.721912	0.727544	0.714721	0.855156	1.0137	1.00625	1.04346	1.13182	1.17592	1.22921	1.40671	1.6036	1.8285	2.36888	3.10045	3.73861	4.07277	4.44926	4.76532	4.9851	5.09198	5.14681	5.11453	5.18755	5.6286	6.20424	6.81128	7.53113	8.26953	8.87256	9.31906	9.55006	9.78184	9.80536	9.71441	9.63604	9.65645	9.60455	9.39584	8.93555	8.47145	8.23788	8.06201	7.74708	7.34972	7.01874	6.70388	6.34709	5.88942	5.47555
0.826298	0.823992	0.867439	1.0001	1.11153	1.18451	1.21485	1.30381	1.34935	1.37297	1.54203	1.75965	1.99399	2.51942	3.34595	3.97566	4.33789	4.72276	5.07699	5.28827	5.41622	5.47488	5.41784	5.53736	5.98781	6.59723	7.26038	8.02389	8.8141	9.46913	9.91472	10.1928	10.4297	10.4606	10.3753	10.3068	10.2898	10.2361	10.0347	9.5358	9.04272	8.80072	8.60194	8.26378	7.83155	7.46788	7.14942	6.78008	6.29614	5.83587
0.866866	0.876863	0.903343	1.04256	1.16785	1.2203	1.26924	1.37317	1.42102	1.45492	1.64361	1.86958	2.12417	2.71768	3.61352	4.29388	4.68861	5.11289	5.50932	5.74521	5.89086	5.95256	5.90439	6.0477	6.53461	7.20285	7.94482	8.79467	9.67024	10.4094	10.9091	11.2346	11.4911	11.5276	11.4381	11.3549	11.3354	11.2795	11.0451	10.4891	9.94827	9.65855	9.44726	9.05931	8.57633	8.16471	7.79148	7.3857	6.82458	6.3238
0.835844	0.857637	0.903343	1.02584	1.14908	1.21342	1.24414	1.32739	1.38721	1.4276	1.61759	1.83099	2.08807	2.68311	3.55134	4.22675	4.62154	5.03456	5.397	5.65035	5.76339	5.8246	5.78886	5.90979	6.40294	7.07039	7.79043	8.61596	9.49137	10.193	10.6822	11.004	11.2513	11.2872	11.2004	11.1215	11.1103	11.0523	10.8217	10.2743	9.73409	9.46256	9.23119	8.87034	8.40101	7.99345	7.63496	7.23097	6.69328	6.20195
0.835844	0.855234	0.898391	1.01297	1.1598	1.21066	1.24693	1.34542	1.37639	1.4198	1.59777	1.82865	2.06947	2.65363	3.50988	4.17444	4.58113	4.98711	5.35815	5.59022	5.71215	5.77739	5.73263	5.85936	6.33771	6.994	7.69355	8.50912	9.37276	10.064	10.5506	10.8667	11.1157	11.1468	11.064	10.9805	10.9736	10.9245	10.6803	10.1432	9.62667	9.33405	9.1339	8.75944	8.28978	7.89281	7.55042	7.14667	6.61202	6.12978
0.869253	0.884073	0.957817	1.05929	1.18796	1.26985	1.30969	1.41062	1.48864	1.52516	1.70307	1.97835	2.24122	2.87223	3.82833	4.56241	4.98762	5.44728	5.85618	6.11463	6.25404	6.32775	6.28335	6.43289	6.95705	7.68834	8.48174	9.40136	10.3559	11.1531	11.7043	12.0527	12.3336	12.3745	12.2799	12.2016	12.182	12.1188	11.8521	11.2532	10.6754	10.3718	10.1207	9.71295	9.20201	8.73736	8.32443	7.87097	7.26477	6.71865
0.882378	0.903299	0.931818	1.05929	1.19868	1.27261	1.29295	1.455	1.48999	1.53557	1.73652	1.9725	2.25763	2.9129	3.85282	4.57636	5.02317	5.46234	5.87243	6.13935	6.27069	6.33707	6.30169	6.44322	6.98326	7.72099	8.51862	9.42553	10.4123	11.2081	11.736	12.1076	12.3948	12.4318	12.3338	12.2572	12.2431	12.1945	11.9141	11.3059	10.7353	10.4174	10.1719	9.75136	9.21591	8.75443	8.36041	7.90036	7.28521	6.73852
0.845389	0.857637	0.878582	1.00654	1.12762	1.20378	1.2288	1.36207	1.39668	1.43411	1.62627	1.8614	2.10448	2.69735	3.56076	4.22675	4.63043	5.02402	5.40972	5.64634	5.77556	5.83144	5.79803	5.92194	6.41452	7.07717	7.80668	8.63949	9.52053	10.2274	10.7126	11.039	11.3006	11.3235	11.236	11.1618	11.1604	11.1057	10.8644	10.325	9.79137	9.50626	9.29437	8.92176	8.4397	8.04053	7.67609	7.25592	6.71642	6.21241
0.998117	1.04509	1.09029	1.22912	1.41187	1.50249	1.54817	1.70883	1.77264	1.82435	2.09949	2.40757	2.75648	3.60631	4.79026	5.7298	6.30484	6.8722	7.40397	7.74797	7.92519	8.01919	7.98625	8.18263	8.88456	9.83912	10.887	12.0972	13.3735	14.4213	15.1503	15.6318	16.0219	16.0751	15.964	15.8691	15.8448	15.7618	15.4049	14.617	13.8465	13.433	13.0832	12.5462	11.8305	11.2116	10.6921	10.0566	9.25798	8.53441
0.952776	0.951364	1.03458	1.14935	1.28583	1.36897	1.42962	1.55625	1.60765	1.66565	1.90624	2.2146	2.52456	3.24232	4.32672	5.17618	5.66401	6.17781	6.65162	6.94567	7.1162	7.1918	7.15008	7.33814	7.95677	8.80593	9.72186	10.8011	11.912	12.8464	13.4918	13.9043	14.2459	14.2946	14.1769	14.1035	14.0865	14.0008	13.7022	13.0082	12.3179	11.95	11.6598	11.1671	10.5483	10.0168	9.5417	9.00068	8.29958	7.65425
1.01005	1.03548	1.07791	1.24455	1.42259	1.49285	1.55793	1.69218	1.74965	1.83605	2.09949	2.3947	2.75867	3.55852	4.74598	5.6522	6.21352	6.77053	7.29942	7.63574	7.80541	7.89931	7.86034	8.06598	8.74923	9.68695	10.7045	11.9076	13.1609	14.1976	14.906	15.3909	15.7633	15.827	15.7088	15.6052	15.5935	15.5346	15.1788	14.4042	13.6486	13.228	12.9056	12.3734	11.6691	11.0662	10.5482	9.92575	9.1525	8.4157
1.12221	1.17006	1.24628	1.40023	1.58751	1.68419	1.76433	1.93908	2.03905	2.08971	2.40795	2.78182	3.17875	4.12993	5.50534	6.58856	7.26165	7.91604	8.52861	8.90568	9.12491	9.22923	9.17816	9.42264	10.2287	11.3405	12.559	13.9579	15.4332	16.6796	17.5346	18.0936	18.5369	18.6248	18.4889	18.3885	18.3693	18.2694	17.8665	16.9537	16.0566	15.5721	15.1769	14.5387	13.7142	13.0066	12.3715	11.6389	10.7184	9.84708
1.09357	1.10517	1.17448	1.35391	1.54192	1.6429	1.70436	1.86695	1.98631	2.03378	2.32495	2.70229	3.07592	3.98047	5.32068	6.36101	7.00547	7.65546	8.24745	8.61775	8.8213	8.94101	8.89516	9.12677	9.91781	10.9925	12.1583	13.5217	14.9581	16.1569	16.9838	17.5322	17.9606	18.0218	17.8924	17.796	17.7754	17.6926	17.2949	16.4175	15.541	15.0709	14.6835	14.0604	13.2626	12.5805	11.9665	11.2601	10.3547	9.52963
1.14607	1.16525	1.24628	1.41953	1.6103	1.6897	1.78246	1.95433	2.00795	2.11312	2.42406	2.80521	3.21813	4.14315	5.57506	6.66092	7.31741	7.9906	8.60561	9.00054	9.20946	9.32241	9.28146	9.51985	10.35	11.4712	12.6965	14.1138	15.6238	16.8629	17.733	18.3022	18.7454	18.8387	18.6972	18.5781	18.5759	18.4804	18.0659	17.1546	16.233	15.7392	15.3519	14.6974	13.8707	13.152	12.5121	11.7698	10.8411	9.96997
1.11266	1.13882	1.21905	1.3745	1.5379	1.64152	1.69599	1.86556	1.95926	2.02597	2.31009	2.66603	3.03872	3.93472	5.25285	6.27121	6.89557	7.50634	8.09627	8.44807	8.6522	8.75838	8.71301	8.94146	9.70872	10.7534	11.8952	13.2145	14.6146	15.7685	16.5666	17.0881	17.5227	17.5865	17.4603	17.3632	17.3442	17.2746	16.8954	16.0433	15.196	14.7516	14.3827	13.7835	13.0147	12.348	11.758	11.0871	10.2088	9.39418
1.44675	1.47527	1.56075	1.77076	1.98303	2.12606	2.20782	2.41067	2.50292	2.5632	2.94312	3.39582	3.86576	4.98501	6.6491	7.90765	8.69281	9.46824	10.1788	10.6339	10.8729	11.002	10.9538	11.2307	12.1782	13.4895	14.9017	16.5539	18.2842	19.7314	20.7221	21.3735	21.9158	22.0131	21.8457	21.7448	21.7265	21.644	21.1771	20.1159	19.0727	18.5209	18.0761	17.3386	16.3819	15.5597	14.8301	13.9798	12.8908	11.8814
1.19857	1.24216	1.25866	1.45169	1.66527	1.73512	1.83127	2.00288	2.0945	2.15735	2.47361	2.82158	3.23564	4.17874	5.57883	6.64523	7.3069	7.97328	8.59007	8.96847	9.16847	9.28948	9.25273	9.48826	10.3	11.4046	12.6009	14.0076	15.4864	16.7048	17.5393	18.1073	18.5528	18.6381	18.5175	18.4058	18.3954	18.3269	17.9112	17.0314	16.1373	15.6544	15.2824	14.6465	13.8314	13.1508	12.5212	11.8047	10.8831	10.0291
1.33221	1.37073	1.43818	1.64211	1.86639	1.96088	2.06138	2.2359	2.34469	2.42271	2.75978	3.18297	3.65681	4.72371	6.28921	7.51532	8.2532	8.99377	9.69987	10.1235	10.3567	10.4902	10.4471	10.7155	11.635	12.8931	14.2548	15.8404	17.524	18.8943	19.8696	20.5108	21.0171	21.1159	20.9654	20.8342	20.8292	20.7419	20.2921	19.272	18.2577	17.7209	17.3022	16.5622	15.6444	14.844	14.1366	13.3099	12.2553	11.2873
1.37158	1.42961	1.48151	1.71158	1.9294	2.05173	2.15622	2.31358	2.42854	2.50596	2.83906	3.26484	3.74105	4.83046	6.44372	7.6984	8.46089	9.20691	9.92452	10.3627	10.5892	10.72	10.6708	10.9318	11.8776	13.1426	14.5286	16.1533	17.8681	19.2655	20.2442	20.8951	21.4112	21.4953	21.3402	21.2197	21.213	21.1199	20.6569	19.6363	18.5936	18.0685	17.6326	16.9011	15.9606	15.1577	14.4365	13.6072	12.5448	11.5488
1.15204	1.18207	1.24876	1.39894	1.617	1.69796	1.77967	1.94879	2.05528	2.10012	2.40919	2.79702	3.19188	4.14112	5.51005	6.59204	7.23983	7.91152	8.52225	8.90501	9.10761	9.22675	9.191	9.42143	10.2269	11.3405	12.5396	13.9401	15.4183	16.6201	17.4846	18.0456	18.5014	18.5724	18.4476	18.3398	18.3294	18.2464	17.8332	16.9386	16.0521	15.5708	15.1775	14.5437	13.7444	13.0325	12.4132	11.6871	10.7583	9.91192
1.14607	1.18207	1.24133	1.41824	1.61968	1.70071	1.76015	1.91966	2.02147	2.0689	2.40424	2.76544	3.16891	4.13603	5.51759	6.58681	7.25114	7.91077	8.52155	8.90501	9.1153	9.22364	9.20383	9.43115	10.2488	11.359	12.5684	13.9732	15.4565	16.6929	17.5312	18.095	18.557	18.6297	18.4917	18.3912	18.3734	18.2755	17.8632	16.957	16.0696	15.5805	15.1826	14.5499	13.7269	13.0202	12.4024	11.6661	10.7346	9.87793
1.30834	1.32507	1.42828	1.59965	1.81678	1.91407	1.99584	2.19845	2.28248	2.35377	2.69164	3.10344	3.54632	4.58543	6.13281	7.30957	8.05117	8.76256	9.44556	9.87232	10.0889	10.2206	10.1739	10.4348	11.3241	12.5481	13.8841	15.4232	17.047	18.3908	19.3356	19.9446	20.4436	20.5206	20.3886	20.2799	20.2621	20.1812	19.7359	18.7449	17.7622	17.2287	16.8107	16.1112	15.214	14.4409	13.7613	12.9594	11.9368	10.9981
1.10908	1.15444	1.19924	1.38608	1.55935	1.63051	1.71691	1.89192	1.9809	2.04288	2.35469	2.7058	3.10655	4.04046	5.38852	6.44122	7.09679	7.75035	8.36613	8.73132	8.94236	9.06152	9.02535	9.25071	10.0416	11.1323	12.3184	13.7061	15.1526	16.3461	17.1903	17.7456	18.1768	18.2573	18.1351	18.0189	18.0068	17.9171	17.509	16.6263	15.7428	15.2637	14.8762	14.2389	13.4379	12.7435	12.1253	11.3993	10.4962	9.6473
1.59948	1.64109	1.73532	1.95989	2.24582	2.37934	2.4714	2.68946	2.80449	2.8962	3.26397	3.75721	4.27162	5.5371	7.35477	8.75245	9.60841	10.4586	11.2441	11.7308	11.9926	12.1357	12.0766	12.379	13.4284	14.8498	16.4175	18.222	20.1281	21.6966	22.7857	23.5134	24.102	24.2002	24.0349	23.8932	23.8926	23.8047	23.3027	22.1252	20.9886	20.3799	19.8982	19.0864	18.0437	17.1399	16.3438	15.4162	14.2141	13.1094
1.4038	1.43201	1.52237	1.72059	1.95488	2.07926	2.17574	2.36212	2.47722	2.55279	2.93445	3.36658	3.8395	4.99009	6.66229	7.95734	8.7413	9.53377	10.2664	10.7234	10.9793	11.0946	11.0583	11.3425	12.3068	13.638	15.0792	16.7523	18.5221	19.9702	20.9719	21.6535	22.1918	22.2912	22.1352	21.9948	21.9902	21.8976	21.4239	20.3352	19.2661	18.6976	18.2315	17.4786	16.4962	15.6627	14.914	14.0475	12.9409	11.9196
1.10908	1.16886	1.22028	1.3835	1.57142	1.66354	1.73923	1.91411	1.96873	2.03378	2.33239	2.69878	3.09342	4.00589	5.34706	6.36537	7.03537	7.666	8.25946	8.64514	8.84307	8.95095	8.91594	9.14439	9.92513	11.0035	12.1721	13.523	14.9581	16.1384	16.9649	17.5061	17.9404	18.0085	17.8736	17.7821	17.7527	17.6588	17.2803	16.3924	15.5384	15.0677	14.6974	14.0753	13.2934	12.6005	11.9962	11.2978	10.3902	9.56624
1.15442	1.17006	1.25	1.41567	1.59019	1.69933	1.77549	1.91134	2.035	2.11052	2.40672	2.78416	3.17656	4.11875	5.52136	6.58333	7.24063	7.9183	8.52155	8.90835	9.11466	9.23358	9.18611	9.43722	10.2403	11.3486	12.5584	13.9649	15.4345	16.6518	17.5123	18.0675	18.5202	18.6018	18.4644	18.3628	18.3308	18.2559	17.8538	16.9504	16.0566	15.5657	15.1744	14.5332	13.7184	13.0054	12.383	11.6622	10.7244	9.87113
1.09834	1.13882	1.19676	1.36678	1.56605	1.63877	1.71412	1.87527	1.96197	2.01426	2.33239	2.69761	3.08139	4.01097	5.37721	6.43424	7.06366	7.71119	8.31527	8.68589	8.88855	8.99691	8.96912	9.19056	9.98365	11.0695	12.2321	13.6177	15.0638	16.28	17.1005	17.653	18.0975	18.163	18.0519	17.9266	17.9127	17.8305	17.4263	16.536	15.6478	15.1725	14.7732	14.1478	13.3381	12.6294	12.0231	11.3095	10.3993	9.56362
0.790503	0.801161	0.836488	0.955074	1.06729	1.12119	1.19533	1.28301	1.32771	1.34435	1.53583	1.72222	1.97539	2.51637	3.33088	3.96695	4.35082	4.72728	5.07275	5.30097	5.42198	5.47675	5.43985	5.54647	6.01585	6.62988	7.29663	8.09194	8.90289	9.56971	10.0362	10.3369	10.5819	10.6171	10.5291	10.461	10.4676	10.4214	10.1788	9.68534	9.17292	8.91124	8.69923	8.3468	7.89805	7.52674	7.19055	6.79505	6.28646	5.81913
1.16516	1.2001	1.26733	1.43239	1.64114	1.72686	1.81175	1.98207	2.06881	2.14174	2.46246	2.84263	3.25095	4.23669	5.67399	6.76467	7.45398	8.13746	8.76173	9.17155	9.3792	9.49323	9.44711	9.7009	10.5341	11.6739	12.9184	14.3643	15.8985	17.1574	18.0301	18.6193	19.0707	19.1559	19.0356	18.9136	18.8869	18.8159	18.3887	17.4557	16.5318	16.0348	15.6299	14.9675	14.1307	13.3939	12.7514	11.9983	11.0445	10.1614
0.606752	0.611306	0.642113	0.722204	0.825951	0.833493	0.887118	0.947345	0.982854	1.00615	1.12579	1.2895	1.46561	1.86159	2.45657	2.92597	3.19764	3.46729	3.71781	3.87071	3.95388	3.98408	3.95149	4.03003	4.36143	4.80378	5.28207	5.84322	6.43619	6.91499	7.24831	7.45714	7.61788	7.63691	7.5785	7.52211	7.4914	7.4485	7.27495	6.91252	6.5279	6.33388	6.18664	5.9243	5.60631	5.3409	5.09074	4.80572	4.45038	4.11686
0.922946	0.980203	1.0222	1.15707	1.32069	1.41301	1.47983	1.62699	1.68879	1.7489	2.02516	2.33272	2.66459	3.4599	4.6235	5.52579	6.08503	6.64174	7.14542	7.47475	7.6472	7.74588	7.72098	7.91774	8.60781	9.53662	10.5494	11.7417	12.9976	14.0282	14.7419	15.2303	15.6055	15.6733	15.5718	15.4635	15.4342	15.3757	15.024	14.2527	13.4891	13.0751	12.7275	12.1962	11.4901	10.8844	10.3523	9.73275	8.95501	8.22795
0.91698	0.934541	0.988768	1.12362	1.27913	1.36071	1.41986	1.55764	1.62388	1.67476	1.89633	2.1912	2.49831	3.23927	4.3239	5.14392	5.67694	6.18535	6.66928	6.95836	7.12837	7.21229	7.17942	7.36852	8.00432	8.87494	9.80687	10.9117	12.0618	13.0271	13.6889	14.1267	14.4787	14.5434	14.4349	14.3501	14.3364	14.2747	13.9523	13.2289	12.5074	12.1395	11.824	11.3096	10.6795	10.1128	9.62167	9.06113	8.33456	7.66523
0.795275	0.807169	0.84763	0.961507	1.09947	1.14459	1.21206	1.32323	1.35881	1.43021	1.60892	1.84268	2.10886	2.73497	3.64273	4.35578	4.78639	5.22887	5.63789	5.88683	6.02024	6.09108	6.07064	6.22511	6.75832	7.48749	8.26797	9.1915	10.1706	10.9639	11.5193	11.901	12.1793	12.2347	12.1415	12.0662	12.0515	11.9977	11.718	11.1004	10.5244	10.1874	9.94131	9.50477	8.96322	8.51019	8.08451	7.61253	6.9957	6.44461
0.918173	0.95617	0.986292	1.12362	1.27243	1.3552	1.40034	1.52158	1.57113	1.59801	1.77864	2.03332	2.3003	2.94747	3.88297	4.5999	5.03206	5.45782	5.88656	6.13801	6.26813	6.34576	6.29069	6.43836	6.97534	7.71544	8.49862	9.38928	10.3637	11.1485	11.6847	12.0492	12.3308	12.3829	12.3023	12.2426	12.2294	12.2013	11.9435	11.36	10.7887	10.4843	10.2547	9.85235	9.33802	8.89097	8.50322	8.04234	7.4488	6.9043
0.636582	0.630532	0.660684	0.760801	0.856789	0.911955	0.9178	1.0167	1.03289	1.05298	1.18401	1.36201	1.5214	1.96123	2.59318	3.08639	3.38028	3.6857	3.96083	4.13591	4.23187	4.28659	4.24611	4.34413	4.7028	5.18514	5.73086	6.34435	6.98125	7.5211	7.87948	8.12011	8.3137	8.34824	8.2791	8.23755	8.22533	8.18428	8.01524	7.60886	7.22773	7.00537	6.84938	6.56803	6.22474	5.91767	5.65796	5.3531	4.95837	4.58439
0.664025	0.679798	0.691635	0.782673	0.902375	0.92985	0.959638	1.03612	1.06264	1.0855	1.22118	1.36201	1.56187	1.96123	2.59318	3.06895	3.34634	3.64277	3.91985	4.08982	4.17102	4.21702	4.18559	4.26454	4.61868	5.08287	5.59647	6.17073	6.78487	7.27032	7.60743	7.83735	8.00437	8.04289	7.97915	7.92776	7.92736	7.90769	7.75314	7.38289	7.01615	6.83059	6.6889	6.43978	6.10444	5.85176	5.60255	5.32704	4.95191	4.60897
0.394365	0.398619	0.396978	0.455883	0.510871	0.521019	0.517546	0.563137	0.574439	0.597696	0.667427	0.725781	0.800476	1.00448	1.30338	1.53365	1.65496	1.79384	1.9263	2.01224	2.04893	2.06591	2.04994	2.07128	2.2358	2.46323	2.68995	2.95727	3.2326	3.4702	3.59972	3.70576	3.77733	3.78188	3.74617	3.71221	3.7057	3.68576	3.61482	3.4348	3.27224	3.18528	3.12566	3.00987	2.85271	2.74074	2.6362	2.50304	2.33878	2.18761
0.333206	0.342302	0.340865	0.388763	0.423031	0.443589	0.44844	0.472979	0.486694	0.485512	0.526968	0.589195	0.657866	0.805227	1.04928	1.23544	1.32891	1.44068	1.53183	1.57996	1.60607	1.61375	1.59525	1.62132	1.74943	1.92133	2.11567	2.33653	2.57453	2.76668	2.90355	2.98049	3.04361	3.04389	3.00545	2.97511	2.95753	2.92558	2.85316	2.69372	2.54166	2.44983	2.37467	2.26204	2.12397	2.00717	1.89646	1.78254	1.63379	1.49858
0.360794	0.364912	0.374712	0.410848	0.450172	0.466818	0.478389	0.502454	0.505368	0.509094	0.553365	0.611248	0.667788	0.828881	1.06119	1.24043	1.33862	1.43694	1.52586	1.57709	1.59345	1.60523	1.58581	1.61172	1.73743	1.91146	2.09653	2.31282	2.54524	2.73337	2.85957	2.93785	2.99859	2.99544	2.96231	2.9325	2.91282	2.88498	2.80846	2.6585	2.50595	2.41737	2.34713	2.24035	2.10872	1.99233	1.88818	1.77488	1.63161	1.50028
0.601519	0.610343	0.638417	0.703544	0.785699	0.824029	0.844475	0.896372	0.918517	0.923073	1.01358	1.13608	1.2599	1.57415	2.04667	2.40629	2.611	2.82365	3.01978	3.14012	3.20039	3.22338	3.19199	3.25833	3.51392	3.86602	4.24689	4.68539	5.14415	5.51844	5.77592	5.94355	6.07451	6.0904	6.0353	5.99292	5.98603	5.95506	5.82733	5.53672	5.25561	5.10846	4.99508	4.8004	4.55083	4.33869	4.1555	3.93891	3.65187	3.39214
0.618223	0.628067	0.653584	0.721235	0.808827	0.845021	0.861559	0.918564	0.939478	0.944861	1.04889	1.17145	1.29791	1.62143	2.10673	2.47211	2.68696	2.90856	3.11003	3.23882	3.2992	3.32773	3.29651	3.36116	3.62243	3.98339	4.37127	4.82069	5.28997	5.66732	5.92578	6.09454	6.22465	6.23802	6.18423	6.14348	6.13124	6.10552	5.97356	5.6749	5.38988	5.245	5.13123	4.93376	4.6805	4.46508	4.27874	4.06065	3.77039	3.50785
0.484288	0.492284	0.508422	0.560734	0.625477	0.647832	0.656899	0.699413	0.711942	0.714295	0.782545	0.859189	0.951124	1.1822	1.51813	1.7729	1.92047	2.06637	2.19785	2.27986	2.30941	2.32253	2.29836	2.33713	2.51603	2.76629	3.0324	3.3394	3.66549	3.92475	4.10401	4.22125	4.31046	4.31469	4.27331	4.242	4.23136	4.20572	4.10898	3.9008	3.69956	3.59392	3.51008	3.37447	3.19444	3.04523	2.91409	2.76331	2.56149	2.38293
0.710695	0.722694	0.748914	0.8396	0.937541	0.978889	1.01183	1.07669	1.10041	1.11787	1.23812	1.38285	1.5498	1.93967	2.52669	2.97211	3.23426	3.49921	3.74511	3.89851	3.97176	4.00729	3.97483	4.05392	4.37862	4.81927	5.29402	5.84712	6.42124	6.88947	7.21106	7.42032	7.58692	7.61037	7.54803	7.49934	7.49424	7.45839	7.30109	6.94191	6.59293	6.40934	6.26843	6.02838	5.71424	5.45279	5.22097	4.94814	4.59493	4.26864
0.42866	0.434226	0.443624	0.4859	0.545041	0.563347	0.569075	0.606828	0.621254	0.622096	0.683677	0.768718	0.845481	1.05534	1.37856	1.61643	1.75438	1.89821	2.02315	2.09969	2.13579	2.14516	2.13008	2.16812	2.33799	2.56885	2.81886	3.11176	3.42257	3.6742	3.84219	3.94819	4.02999	4.03227	3.99447	3.95068	3.93553	3.90414	3.80721	3.60482	3.40001	3.29513	3.20672	3.06779	2.88809	2.73607	2.60735	2.45721	2.2634	2.08745
0.773491	0.783296	0.828659	0.931699	1.05453	1.10226	1.14784	1.24209	1.28797	1.31672	1.47775	1.68505	1.9017	2.4132	3.19077	3.78599	4.15408	4.52814	4.87254	5.09215	5.21067	5.26995	5.2483	5.37355	5.81873	6.43084	7.09427	7.86104	8.66511	9.32839	9.78728	10.0958	10.3424	10.3833	10.3104	10.2563	10.2584	10.2157	10.0027	9.50291	9.02109	8.77241	8.57623	8.23434	7.79802	7.42496	7.09487	6.70874	6.20973	5.74957
0.681616	0.68236	0.714758	0.81269	0.901685	0.951531	0.998616	1.06802	1.10473	1.12811	1.2622	1.426	1.61946	2.04463	2.68861	3.18617	3.48132	3.79007	4.07145	4.24274	4.33539	4.38944	4.36537	4.45949	4.83089	5.3382	5.88259	6.51473	7.17381	7.7165	8.08921	8.34436	8.54168	8.57418	8.51062	8.4656	8.46443	8.43174	8.25031	7.8487	7.44696	7.24052	7.07986	6.80346	6.43996	6.14107	5.87131	5.55324	5.14639	4.76926
0.723377	0.744845	0.777899	0.869943	0.988835	1.04169	1.08299	1.16026	1.20277	1.22371	1.38051	1.56166	1.75785	2.23629	2.95099	3.49131	3.82073	4.15346	4.46458	4.66561	4.76743	4.82892	4.80576	4.91637	5.32435	5.8779	6.48046	7.17676	7.90909	8.50259	8.91918	9.1971	9.4158	9.45391	9.38882	9.33767	9.33396	9.30344	9.10498	8.65736	8.2171	7.98462	7.80356	7.49923	7.10614	6.77021	6.47766	6.1339	5.67752	5.26556
0.490109	0.501517	0.52286	0.572744	0.640235	0.676912	0.693195	0.746919	0.747701	0.762582	0.837909	0.937716	1.04349	1.30546	1.70783	2.00745	2.19157	2.37607	2.55015	2.66284	2.72284	2.7508	2.72726	2.78205	3.00488	3.31248	3.63769	4.00908	4.39862	4.71571	4.92867	5.07271	5.19015	5.20304	5.17123	5.14227	5.14354	5.13122	5.02636	4.7903	4.55944	4.43955	4.35309	4.20345	3.9992	3.82722	3.67753	3.49791	3.26431	3.04659
0.562894	0.570009	0.60519	0.689179	0.775653	0.798735	0.838932	0.90088	0.945147	0.966807	1.08877	1.25057	1.42036	1.82654	2.41397	2.87275	3.15242	3.42932	3.69245	3.84927	3.93377	3.98661	3.9647	4.06944	4.41637	4.89461	5.41536	6.03332	6.6725	7.20467	7.57888	7.82207	8.02242	8.05466	7.99461	7.94951	7.93784	7.90121	7.71576	7.31904	6.92291	6.70751	6.53431	6.24957	5.88743	5.58019	5.30409	4.98173	4.58056	4.20706
0.749627	0.775486	0.805136	0.90661	1.04112	1.09469	1.13529	1.24348	1.29947	1.32713	1.50253	1.72306	1.94765	2.50725	3.32644	3.94336	4.33671	4.73299	5.10107	5.33498	5.4624	5.53239	5.51113	5.65333	6.13084	6.78849	7.50493	8.33387	9.20563	9.92689	10.4245	10.7691	11.0326	11.0841	11.0106	10.9533	10.946	10.9032	10.6659	10.1363	9.61057	9.3292	9.10377	8.73402	8.26229	7.84959	7.48901	7.06535	6.52103	6.02126
0.647013	0.666739	0.689997	0.777309	0.870847	0.912299	0.958172	1.02571	1.05266	1.07998	1.21575	1.37512	1.55765	1.98871	2.60664	3.09724	3.39647	3.69668	3.98173	4.15423	4.25083	4.30434	4.2856	4.38841	4.75469	5.25872	5.79821	6.41743	7.07887	7.61823	7.99808	8.24793	8.44506	8.48963	8.42846	8.38398	8.39097	8.35938	8.18695	7.78579	7.39033	7.18012	7.02015	6.75079	6.3925	6.08692	5.8239	5.50804	5.09823	4.72429
0.720991	0.726219	0.76428	0.850001	0.969394	1.01898	1.06416	1.15124	1.1879	1.20876	1.36874	1.55815	1.76496	2.26272	2.99574	3.55932	3.91083	4.25777	4.58361	4.80122	4.9093	4.96961	4.94726	5.07251	5.49687	6.08706	6.72048	7.4588	8.23833	8.87843	9.32386	9.61849	9.86172	9.90391	9.84015	9.78604	9.79086	9.75046	9.54049	9.07272	8.61161	8.36149	8.17315	7.84805	7.42442	7.06566	6.74899	6.37044	5.89143	5.44416
0.744854	0.762869	0.803279	0.900177	1.01364	1.06441	1.10042	1.20048	1.24267	1.26339	1.41705	1.62072	1.8213	2.32576	3.0697	3.63647	3.98276	4.33233	4.65637	4.859	4.96983	5.02676	5.00472	5.12415	5.54868	6.13019	6.76173	7.49028	8.26555	8.89101	9.33163	9.63188	9.86484	9.90601	9.844	9.79333	9.79224	9.75587	9.5535	9.0882	8.62755	8.38559	8.194	7.87345	7.45556	7.10156	6.79241	6.41758	5.93771	5.5009
0.72636	0.744845	0.771089	0.864153	0.971405	1.0238	1.05928	1.13668	1.1622	1.19315	1.34149	1.52482	1.72503	2.19206	2.89399	3.43203	3.75366	4.08831	4.38758	4.57642	4.67647	4.72798	4.70094	4.81187	5.21158	5.75807	6.34607	7.03398	7.75419	8.34709	8.75616	9.02964	9.2448	9.28517	9.22136	9.16819	9.17605	9.14317	8.94125	8.50913	8.07518	7.84711	7.6791	7.37222	6.98524	6.65103	6.35571	6.00967	5.55779	5.13796
0.856417	0.879426	0.921513	1.05006	1.17654	1.23372	1.29218	1.40368	1.45837	1.49818	1.7026	1.95462	2.22661	2.87276	3.80363	4.53272	4.9836	5.4383	5.84706	6.12259	6.26788	6.3424	6.32285	6.49205	7.03546	7.80104	8.62816	9.58828	10.601	11.4365	12.0186	12.4142	12.7308	12.7817	12.7009	12.6318	12.6188	12.5668	12.2863	11.6664	11.0574	10.7262	10.458	10.0206	9.4671	8.98253	8.55663	8.05474	7.41701	6.84024
0.919656	0.943112	0.996415	1.11311	1.27978	1.34384	1.39887	1.51395	1.56521	1.60355	1.824	2.09204	2.36062	3.02477	4.01514	4.7764	5.24867	5.7147	6.14412	6.42287	6.57213	6.65267	6.62449	6.78914	7.37134	8.16484	9.01382	10.015	11.065	11.9318	12.5354	12.944	13.2612	13.3236	13.2372	13.1688	13.1646	13.1156	12.8411	12.1993	11.5681	11.2344	10.9637	10.5289	9.948	9.45248	9.01503	8.49787	7.84051	7.2356
0.99423	1.01941	1.0707	1.2141	1.38034	1.46911	1.52996	1.66098	1.73831	1.80647	2.0507	2.36279	2.69756	3.48484	4.6492	5.55059	6.0984	6.66139	7.17586	7.49206	7.67064	7.77078	7.74122	7.95503	8.64294	9.58248	10.6105	11.8116	13.0784	14.1253	14.8616	15.3482	15.7379	15.8087	15.7023	15.6165	15.6095	15.5379	15.1964	14.4253	13.6598	13.2473	12.9147	12.3554	11.6585	11.0495	10.5039	9.87936	9.07954	8.34849
0.780957	0.761508	0.816679	0.924197	1.04718	1.11431	1.14373	1.23585	1.31283	1.37687	1.55565	1.79239	2.04322	2.65363	3.56924	4.23547	4.65871	5.08728	5.4853	5.73786	5.8742	5.95567	5.92517	6.08476	6.59678	7.29896	8.09108	8.99181	9.94958	10.7429	11.2918	11.6553	11.9596	12.0041	11.9317	11.8745	11.8655	11.8185	11.5567	10.9713	10.3844	10.0794	9.84528	9.42609	8.89551	8.44486	8.02911	7.56871	6.96772	6.41428
1.12459	1.16045	1.24133	1.40023	1.57544	1.64014	1.69321	1.86418	1.93763	1.94792	2.24691	2.57715	2.91511	3.74764	4.94854	5.89719	6.47535	7.04693	7.56151	7.89227	8.06547	8.16144	8.13295	8.32541	9.02538	9.99192	11.0389	12.2561	13.5349	14.6045	15.3259	15.8315	16.2249	16.2924	16.1927	16.1234	16.127	16.0689	15.7263	14.9582	14.185	13.78	13.4521	12.9149	12.2119	11.6077	11.0726	10.4498	9.64004	8.91305
1.84766	1.89944	1.97178	2.24165	2.54213	2.65878	2.73498	2.94468	3.02493	3.0575	3.40024	3.82855	4.28147	5.41916	7.09474	8.38367	9.12111	9.85837	10.5483	10.9766	11.1983	11.307	11.2301	11.4585	12.3866	13.6626	15.028	16.615	18.2687	19.6242	20.5743	21.2012	21.7233	21.8112	21.68	21.5885	21.6304	21.5973	21.1698	20.1719	19.1977	18.7188	18.3427	17.6781	16.7942	16.0447	15.3956	14.6043	13.5673	12.623
1.14011	1.18928	1.25866	1.41052	1.60494	1.6718	1.74481	1.8933	1.95521	2.01426	2.26549	2.59586	2.95558	3.77916	4.99941	5.95212	6.51899	7.07931	7.61519	7.94638	8.12952	8.22853	8.18368	8.38009	9.07841	10.0517	11.107	12.3267	13.6068	14.6628	15.4055	15.9049	16.3	16.3686	16.2619	16.2005	16.2038	16.1561	15.8257	15.0445	14.2807	13.8687	13.5627	13.0146	12.3165	11.7136	11.1937	10.5641	9.76327	9.02287
1.12459	1.18328	1.25866	1.41052	1.59689	1.69107	1.73783	1.90163	1.98361	2.03508	2.34478	2.69761	3.05185	3.93675	5.2406	6.20844	6.84143	7.43856	7.98748	8.35588	8.5401	8.64409	8.6036	8.81935	9.57705	10.6209	11.7514	13.0428	14.441	15.5713	16.3762	16.9076	17.3343	17.4181	17.3107	17.2243	17.2193	17.1685	16.8121	15.9708	15.1446	14.7149	14.3613	13.7668	13.0165	12.3698	11.79	11.117	10.2444	9.44962
2.02187	2.03763	2.15997	2.43206	2.71777	2.8804	2.93441	3.11944	3.2359	3.26433	3.60588	4.06596	4.53964	5.72113	7.50174	8.83789	9.59628	10.3773	11.093	11.5371	11.7626	11.8692	11.7661	12.0047	12.9676	14.2929	15.7249	17.3546	19.0717	20.4804	21.4491	22.1017	22.6311	22.7398	22.5918	22.504	22.549	22.5076	22.0942	21.0546	20.0336	19.5477	19.1817	18.4792	17.568	16.8074	16.137	15.3453	14.2647	13.2804
1.34414	1.3503	1.42828	1.6138	1.83287	1.92922	2.01118	2.17071	2.25814	2.29003	2.57024	2.93854	3.35707	4.29464	5.68812	6.75072	7.39175	8.04181	8.63952	9.00655	9.20626	9.3106	9.25151	9.48522	10.2921	11.3775	12.5578	13.9363	15.3943	16.579	17.4212	17.9769	18.4249	18.5235	18.3875	18.3016	18.3178	18.2566	17.8812	16.9952	16.1367	15.6827	15.3367	14.7215	13.9239	13.2632	12.6583	11.9667	11.0505	10.2121
2.04454	2.0917	2.20454	2.45522	2.76738	2.89554	2.97207	3.15551	3.26024	3.26043	3.63809	4.09169	4.54839	5.72926	7.49986	8.83354	9.58336	10.3389	11.0668	11.4903	11.7171	11.8276	11.7172	11.9513	12.9072	14.2066	15.6049	17.2197	18.9032	20.2938	21.2561	21.8923	22.4212	22.526	22.3841	22.3109	22.3417	22.3115	21.8988	20.8702	19.8754	19.3986	19.0257	18.3621	17.4652	16.7209	16.0759	15.2865	14.2345	13.2689
0.587661	0.593281	0.626019	0.718344	0.816566	0.859647	0.892697	0.96399	1.00043	1.02436	1.15304	1.31289	1.48092	1.87786	2.48201	2.96521	3.23967	3.5298	3.79835	3.97625	4.05893	4.11639	4.09146	4.18434	4.53882	5.01571	5.52522	6.12558	6.74793	7.25775	7.62026	7.86	8.04399	8.0904	8.03718	8.00138	7.99945	7.96314	7.80049	7.42835	7.04089	6.8473	6.69775	6.44102	6.10262	5.80938	5.55286	5.25827	4.87603	4.5117
0.869253	0.88888	0.909533	1.04642	1.17053	1.23269	1.27482	1.34959	1.41155	1.43931	1.61759	1.83684	2.06728	2.65363	3.50706	4.1448	4.53426	4.93364	5.29739	5.53745	5.65898	5.71155	5.68373	5.82655	6.2926	6.96442	7.66667	8.48369	9.33517	10.0554	10.5371	10.8681	11.1422	11.1789	11.1319	11.0715	11.0821	11.0625	10.8404	10.323	9.79788	9.5326	9.32975	8.98124	8.51587	8.13175	7.78405	7.38792	6.84503	6.34838
0.823912	0.843218	0.899629	1.01297	1.16382	1.24095	1.27064	1.40784	1.49134	1.52646	1.74024	2.02279	2.31124	2.98813	3.99415	4.77427	5.23651	5.74024	6.19668	6.48205	6.63451	6.72033	6.69533	6.89037	7.48008	8.29704	9.18244	10.2294	11.31	12.233	12.8525	13.2846	13.6356	13.6979	13.614	13.5332	13.5386	13.4673	13.1833	12.503	11.8524	11.4847	11.1973	10.7334	10.1227	9.60604	9.12985	8.5925	7.90406	7.25731
0.802434	0.798758	0.840202	0.97566	1.09142	1.14872	1.2037	1.29965	1.34258	1.40939	1.6275	1.87426	2.16465	2.79495	3.74071	4.47958	4.91327	5.36293	5.78978	6.06854	6.20344	6.28675	6.26746	6.43228	6.99058	7.74194	8.568	9.53936	10.5478	11.4006	11.9959	12.4	12.7083	12.7867	12.7065	12.6281	12.6337	12.5712	12.311	11.6861	11.0582	10.7323	10.4695	10.0295	9.46376	8.97925	8.5512	8.05454	7.42136	6.82743
0.715332	0.733871	0.773347	0.87402	0.984161	1.05099	1.08515	1.18453	1.25333	1.27281	1.48504	1.68363	1.95023	2.49908	3.34407	3.99746	4.39688	4.81163	5.18154	5.42589	5.56098	5.6339	5.60488	5.74514	6.2414	6.90713	7.64667	8.50658	9.40517	10.1553	10.6735	11.0301	11.3132	11.3648	11.2878	11.2382	11.2428	11.1889	10.9557	10.3981	9.86298	9.56602	9.33228	8.94902	8.45059	8.03759	7.65324	7.21045	6.64969	6.12455
0.777378	0.79996	0.831536	0.955074	1.06997	1.13495	1.21067	1.27746	1.35611	1.39118	1.57671	1.80877	2.06291	2.67905	3.5617	4.25291	4.67488	5.10536	5.51356	5.77126	5.90367	5.99045	5.9704	6.11149	6.64006	7.35318	8.12796	9.04014	9.97615	10.7654	11.3181	11.6786	11.9721	12.0279	11.9548	11.8919	11.8936	11.8483	11.584	11.024	10.4502	10.1347	9.89393	9.49052	8.96322	8.53432	8.14107	7.66189	7.08665	6.53247
0.75948	0.78554	0.827821	0.921623	1.06595	1.10742	1.16046	1.25665	1.31013	1.33525	1.52964	1.75029	1.98524	2.57636	3.41002	4.07505	4.47608	4.88695	5.26843	5.50472	5.62439	5.70472	5.67456	5.8065	6.30113	6.98475	7.72167	8.58099	9.47257	10.2255	10.7308	11.0864	11.3729	11.42	11.3458	11.2945	11.2915	11.2538	11.0138	10.4706	9.9385	9.65341	9.43273	9.04691	8.5461	8.13411	7.76863	7.33412	6.76754	6.25216
0.757093	0.766314	0.805536	0.91905	1.03913	1.08815	1.15767	1.23724	1.26956	1.33525	1.52468	1.76199	2.00055	2.62211	3.48162	4.17706	4.59164	4.99992	5.41254	5.64701	5.77876	5.87243	5.8341	5.99727	6.50596	7.21764	7.98232	8.87225	9.81931	10.5934	11.1433	11.5029	11.7928	11.849	11.7758	11.7106	11.7158	11.6623	11.4106	10.8448	10.2868	9.97791	9.73283	9.32324	8.80967	8.36717	7.96627	7.49773	6.91552	6.36721
0.932492	0.968186	1.00982	1.14806	1.29522	1.38273	1.40452	1.541	1.59683	1.5785	1.81456	2.08244	2.3364	2.98	3.93385	4.67313	5.1258	5.58209	5.99182	6.25358	6.3956	6.46627	6.44044	6.57991	7.12164	7.88241	8.69426	9.62331	10.6204	11.4311	11.9986	12.3739	12.677	12.742	12.6603	12.6052	12.6118	12.5719	12.3163	11.7124	11.1246	10.819	10.5895	10.1789	9.64875	9.18759	8.78083	8.31575	7.69634	7.13284
0.504138	0.545217	0.560402	0.630857	0.693215	0.716487	0.751841	0.82806	0.858436	0.851352	0.982085	1.11407	1.26541	1.60232	2.12493	2.53539	2.77904	3.00412	3.22402	3.36567	3.44145	3.47348	3.46067	3.53912	3.83231	4.2419	4.67451	5.19582	5.72587	6.16132	6.46054	6.66857	6.81363	6.85011	6.80379	6.75596	6.74854	6.72828	6.584	6.24517	5.93354	5.76521	5.62056	5.39891	5.10758	4.85654	4.62862	4.37036	4.03602	3.72672
0.862094	0.894888	0.921914	1.06443	1.21611	1.27261	1.33618	1.42726	1.49811	1.53557	1.74395	1.99472	2.26201	2.92916	3.90276	4.65221	5.11449	5.58585	6.0123	6.28164	6.41353	6.50043	6.4765	6.62548	7.19601	7.97728	8.80928	9.79184	10.8252	11.664	12.2618	12.6491	12.9641	13.0369	12.9463	12.8865	12.8871	12.8383	12.5591	11.9305	11.3115	10.9732	10.7152	10.2761	9.70618	9.23291	8.7854	8.28192	7.64576	7.05283
0.742775	0.757903	0.782013	0.897178	1.02304	1.10192	1.14094	1.23307	1.24657	1.28842	1.48256	1.68246	1.92945	2.5001	3.3337	3.97915	4.37264	4.76117	5.13562	5.37311	5.4918	5.56371	5.55048	5.68135	6.15849	6.82457	7.53478	8.36794	9.25222	9.98195	10.4919	10.8317	11.1109	11.1733	11.0941	11.0208	11.0224	10.9827	10.741	10.2051	9.66508	9.37839	9.16296	8.78917	8.30006	7.87986	7.52072	7.08733	6.53238	6.02205
0.866866	0.88888	0.919437	1.05157	1.20405	1.26297	1.33061	1.45361	1.50893	1.53557	1.75882	2.02864	2.32984	3.01762	4.0177	4.8135	5.28096	5.7666	6.21222	6.49741	6.64925	6.73213	6.71366	6.87701	7.46727	8.27301	9.15618	10.174	11.2659	12.1523	12.7742	13.1974	13.5229	13.5973	13.5063	13.4353	13.4356	13.3875	13.0759	12.4226	11.7795	11.416	11.1442	10.6714	10.0755	9.56426	9.11271	8.58141	7.90298	7.27039
0.683116	0.702629	0.744872	0.82127	0.957346	0.989041	1.02937	1.12627	1.15866	1.20517	1.35992	1.57486	1.76426	2.25303	3.00113	3.57288	3.91687	4.27691	4.61851	4.82199	4.9403	5.0059	4.97409	5.09385	5.52391	6.10805	6.74158	7.47634	8.24635	8.88353	9.33621	9.61833	9.85826	9.89668	9.83063	9.77818	9.78176	9.73901	9.53851	9.06213	8.59679	8.34642	8.15211	7.82327	7.40658	7.04237	6.71472	6.33696	5.85381	5.41592
1.12817	1.15804	1.22895	1.38222	1.57678	1.64152	1.70436	1.8725	1.9498	1.99345	2.26301	2.59703	2.93699	3.77814	5.01166	5.94601	6.52061	7.11697	7.63921	7.98312	8.15963	8.26145	8.22647	8.43234	9.13937	10.1256	11.1845	12.417	13.7112	14.7958	15.5378	16.0388	16.4432	16.523	16.4094	16.3331	16.3508	16.2873	15.9371	15.148	14.3621	13.9516	13.6233	13.066	12.3534	11.7377	11.1994	10.5685	9.74928	8.98155
1.03988	1.06672	1.10391	1.25485	1.42125	1.52314	1.58164	1.73379	1.78616	1.81394	2.08463	2.37248	2.69741	3.46193	4.60465	5.47784	5.99695	6.5461	7.03663	7.3525	7.51845	7.61854	7.58039	7.75309	8.41396	9.32099	10.2857	11.4129	12.6016	13.5849	14.2728	14.7272	15.0821	15.1464	15.0698	14.9933	14.988	14.9375	14.6172	13.8923	13.1837	12.802	12.5082	12.0109	11.3698	10.8149	10.3129	9.74883	9.00613	8.32941
0.65448	0.677395	0.689159	0.791679	0.905056	0.951875	0.993109	1.05137	1.10051	1.11932	1.26825	1.44738	1.6122	2.11374	2.80704	3.31743	3.65665	3.97942	4.28366	4.48463	4.58865	4.63196	4.6159	4.71716	5.11366	5.65091	6.23716	6.9237	7.63519	8.22845	8.6227	8.89565	9.1263	9.156	9.10276	9.04259	9.0389	9.00729	8.81556	8.36843	7.94123	7.71091	7.52728	7.23159	6.85042	6.49444	6.2149	5.87498	5.42923	5.02003
0.776184	0.795153	0.815441	0.92677	1.06193	1.11844	1.18138	1.26636	1.28849	1.35736	1.54203	1.77719	2.03447	2.61499	3.48916	4.15788	4.57629	4.97883	5.38075	5.63832	5.75762	5.83703	5.79803	5.94745	6.46328	7.15233	7.90544	8.78258	9.71561	10.469	11.0049	11.3677	11.6412	11.7037	11.6346	11.5557	11.5572	11.5088	11.2545	10.6972	10.1338	9.82112	9.60773	9.20924	8.70025	8.26653	7.87659	7.41897	6.83696	6.31282
0.979026	1.00303	1.042	1.17379	1.34483	1.42816	1.50912	1.61312	1.69149	1.7463	1.98428	2.29763	2.60551	3.36738	4.48783	5.34096	5.8628	6.39923	6.89746	7.20152	7.37049	7.46138	7.42942	7.62672	8.27437	9.15957	10.14	11.2717	12.461	13.4499	14.1391	14.592	14.9688	15.0388	14.9425	14.8585	14.8575	14.7914	14.4758	13.75	13.0308	12.6684	12.3661	11.8362	11.1933	10.623	10.1164	9.54308	8.79304	8.10401
1.38471	1.42961	1.47532	1.67813	1.90393	2.00217	2.06278	2.23729	2.29871	2.32776	2.63342	2.98766	3.36472	4.28549	5.66645	6.70713	7.32549	7.94767	8.52225	8.89432	9.08007	9.17643	9.11276	9.32604	10.0928	11.157	12.2952	13.605	14.9977	16.139	16.9297	17.4622	17.8932	17.9736	17.8708	17.7814	17.8083	17.7589	17.4056	16.563	15.7363	15.3151	14.988	14.4037	13.6604	13.0113	12.4544	11.7881	10.9229	10.1373
0.874026	0.893686	0.931818	1.058	1.18796	1.25884	1.30132	1.39258	1.4643	1.48094	1.6498	1.86958	2.13511	2.71565	3.61823	4.29127	4.68781	5.10159	5.46623	5.69978	5.82616	5.89293	5.85549	5.99302	6.48523	7.16034	7.90419	8.75587	9.6521	10.3843	10.8983	11.2469	11.5161	11.5723	11.4842	11.4431	11.4446	11.4013	11.1718	10.6294	10.0908	9.82176	9.61468	9.2334	8.74559	8.3295	7.96399	7.53322	6.97203	6.45507
1.68658	1.73722	1.81084	2.04866	2.31152	2.43991	2.50208	2.68391	2.7788	2.77783	3.13514	3.55605	3.97078	5.05211	6.65287	7.83528	8.54412	9.24456	9.89909	10.3079	10.5283	10.6343	10.5663	10.7829	11.6649	12.8759	14.1742	15.6788	17.2531	18.5509	19.447	20.0606	20.536	20.6268	20.5068	20.4292	20.4509	20.4152	20.024	19.0526	18.1229	17.6509	17.3085	16.6614	15.8191	15.1083	14.4793	13.7336	12.7461	11.8407
0.81198	0.83	0.868677	0.992385	1.1303	1.17074	1.21625	1.32878	1.38451	1.40809	1.573	1.80643	2.05306	2.63024	3.46843	4.11603	4.50032	4.899	5.28115	5.49804	5.62824	5.69291	5.6605	5.798	6.27492	6.92992	7.64854	8.49386	9.3423	10.0455	10.5526	10.8832	11.1595	11.2103	11.1305	11.0826	11.0883	11.0435	10.8124	10.3006	9.77315	9.50497	9.30132	8.93044	8.46509	8.06643	7.7195	7.28698	6.75247	6.25216
0.862094	0.882871	0.950389	1.05285	1.19466	1.26985	1.32363	1.46332	1.50622	1.56939	1.80342	2.09764	2.39985	3.11218	4.17127	4.99571	5.51208	6.02719	6.50115	6.79469	6.94902	7.05887	7.03639	7.22149	7.84827	8.70551	9.63873	10.7229	11.8868	12.8345	13.5107	13.9654	14.3098	14.3911	14.2825	14.2202	14.2115	14.1584	13.8456	13.1361	12.4481	12.0547	11.752	11.2526	10.6118	10.0604	9.55941	8.99347	8.26837	7.60404
1.70448	1.76125	1.82941	2.08469	2.34236	2.46606	2.53555	2.7491	2.80449	2.83897	3.19212	3.60751	4.03642	5.11108	6.73955	7.97129	8.66372	9.37712	10.039	10.4615	10.6795	10.7902	10.7148	10.9348	11.8283	13.0656	14.3779	15.8887	17.4987	18.8037	19.719	20.3365	20.8245	20.9237	20.7962	20.7057	20.7283	20.6803	20.2755	19.3168	18.369	17.8937	17.536	16.8801	16.0252	15.3007	14.6673	13.915	12.9065	11.9913
0.951583	0.975396	1.02096	1.17122	1.32874	1.40751	1.47565	1.59787	1.64146	1.70858	1.98057	2.28243	2.60333	3.36738	4.48971	5.37583	5.9121	6.44744	6.94974	7.27901	7.43902	7.53779	7.50827	7.69416	8.35788	9.26431	10.2513	11.4046	12.6217	13.6285	14.3281	14.8137	15.1669	15.2436	15.1453	15.0717	15.06	15.0064	14.6726	13.9417	13.2013	12.8014	12.4937	11.9911	11.3148	10.7331	10.2203	9.62516	8.86299	8.16362
1.24391	1.26979	1.31685	1.49801	1.68672	1.7833	1.83964	1.98346	2.07692	2.13654	2.40424	2.74673	3.10436	3.99877	5.30655	6.29911	6.87618	7.50107	8.05248	8.39597	8.58302	8.68198	8.62805	8.84304	9.59046	10.6025	11.7195	13.004	14.3612	15.4859	16.2601	16.7793	17.189	17.2769	17.1674	17.091	17.1074	17.0434	16.6974	15.8753	15.058	14.6404	14.3113	13.737	13.0026	12.3751	11.8152	11.1581	10.3073	9.52074
90.9362	91.653	99.1081	110.136	114.94	113.068	114.287	114.582	108.86	107.404	114.18	116.883	127.103	154.98	178.929	187.768	192.264	197.589	200.682	200.572	198.524	192.049	187.038	191.813	203.675	213.942	223.112	233.158	240.916	245.063	246.416	248.575	248.825	246.946	245.694	247.378	250.288	251.499	246.117	239.799	238.24	242.18	242.575	239.769	237.694	238.401	237.815	232.605	226.427	225.725
89.8425	90.5913	98.0139	108.57	113.585	111.609	113.033	113.202	107.398	106.302	112.55	115.374	125.551	152.857	176.937	185.505	189.813	195.387	198.539	198.455	196.088	189.901	184.675	189.451	201.226	211.365	220.395	230.298	237.966	242	243.334	245.607	245.888	243.911	242.845	244.296	247.239	248.545	243.212	236.814	235.453	239.266	239.601	236.822	234.849	235.398	234.582	229.66	223.644	222.878
89.8249	90.3178	98.0139	108.714	113.359	111.496	112.961	113.099	107.294	105.88	112.022	114.717	125.111	152.444	176.388	184.952	189.537	195.034	198.075	198.021	195.693	189.314	184.233	189.161	200.77	211.021	220.059	230.002	237.663	241.767	243.067	245.366	245.679	243.636	242.501	244.085	247.075	248.247	242.787	236.619	235.136	239.172	239.437	236.667	234.746	235.373	234.631	229.725	223.636	222.794
91.0421	91.6208	99.213	110.136	115.039	113.139	114.604	114.7	108.785	107.661	114.06	116.659	127.147	154.838	179.011	187.794	192.364	197.895	201.08	201.14	198.736	192.265	187.327	192.119	203.914	214.323	223.418	233.418	241.285	245.325	246.683	248.99	249.319	247.323	246.126	247.841	250.722	251.854	246.584	240.078	238.642	242.49	243.033	240.312	238.284	238.798	238.188	233.09	226.947	226.055
90.5834	91.09	98.9282	109.26	114.192	112.7	114.057	113.892	108.293	106.785	113.41	115.972	126.107	153.84	177.995	186.663	191.176	196.447	199.798	199.746	197.455	191.146	186.103	190.797	202.586	212.859	222.126	231.858	239.673	243.83	245.164	247.457	247.869	245.782	244.701	246.299	249.14	250.415	245.14	238.632	237.24	241.042	241.287	238.58	236.6	237.195	236.476	231.553	225.465	224.585
90.6893	91.5404	98.8683	109.403	114.658	112.686	114.1	114.171	108.442	106.846	113.154	116.196	126.283	153.769	177.967	186.926	191.264	196.823	200.129	200.025	197.676	191.281	186.163	191.015	202.794	213.053	222.155	232.111	239.875	244.093	245.579	247.661	248.093	246.089	244.877	246.405	249.558	250.613	245.274	238.928	237.496	241.249	241.615	238.993	236.942	237.558	236.914	231.812	225.599	224.776
91.4831	91.9908	99.6626	110.294	115.392	113.338	114.748	114.846	108.904	107.721	114.014	116.913	127.455	155.194	179.217	188.202	192.64	197.965	201.168	201.295	198.842	192.563	187.565	192.369	204.084	214.532	223.951	233.866	241.596	245.814	247.112	249.33	249.735	247.873	246.718	248.376	251.337	252.409	247.094	240.654	239.147	243.042	243.5	240.648	238.455	239.287	238.634	233.422	227.459	226.453
91.2537	91.7495	99.6027	110.365	115.335	113.649	115.166	115.008	109.352	107.872	114.678	117.107	127.469	155.294	179.464	188.518	192.877	198.33	201.687	201.687	199.448	193.15	188.025	192.724	204.517	215.018	224.229	234.292	242.08	246.302	247.579	249.994	250.421	248.487	247.222	248.935	251.902	253.013	247.82	241.288	239.643	243.645	244.087	241.423	239.318	239.861	239.056	234.247	227.893	227.157
89.8249	90.3983	98.0139	108.628	113.529	111.567	113.134	113.29	107.667	106.136	112.52	115.509	125.375	152.814	176.278	185.11	189.587	195.081	198.296	198.3	196.02	189.666	184.726	189.5	201.056	211.395	220.438	230.284	238.01	242.109	243.385	245.811	246.019	244.178	243.053	244.572	247.444	248.727	243.521	237.025	235.598	239.542	239.869	237.184	235.045	235.753	234.979	230.089	224.046	223.23
91.4125	91.9425	99.7076	110.739	115.533	113.564	115.166	115.463	109.411	108.234	114.663	117.391	127.762	155.721	180.082	188.65	193.303	198.813	202.096	202.173	199.843	193.583	188.433	193.264	205.058	215.533	224.959	234.949	242.774	247.09	248.52	250.764	251.3	249.139	247.934	249.698	252.476	253.823	248.546	242.125	240.54	244.636	245.055	242.165	240.078	241.017	240.272	234.999	228.815	227.983
92.9825	93.9211	101.641	112.649	117.791	116.086	117.689	117.856	111.439	110.227	116.792	119.512	130.106	158.799	183.64	192.505	197.443	203.074	206.625	206.458	203.964	197.463	192.276	197.205	209.376	220.059	229.619	239.837	247.972	252.274	253.729	256.027	256.435	254.423	253.278	255.035	257.951	259.316	253.871	247.369	245.945	249.998	250.458	247.49	245.47	246.086	245.499	240.256	233.884	233.15
94.0585	94.6611	102.406	113.711	118.765	116.936	118.395	118.546	112.438	111.102	117.803	120.617	131.468	159.725	184.766	194.058	198.669	204.369	207.697	207.687	205.216	198.844	193.475	198.502	210.635	221.225	230.809	241.224	249.252	253.638	255.062	257.416	257.846	255.783	254.687	256.243	259.213	260.508	255.023	248.181	246.8	250.885	251.383	248.559	246.401	247.099	246.276	241.114	234.727	233.938
93.988	94.3876	102.121	113.51	118.751	116.738	118.121	118.077	112.006	110.906	117.26	120.035	130.663	159.398	184.189	193.242	198.169	203.757	207.155	206.892	204.725	198.05	192.82	197.745	210.024	220.59	230.262	240.495	248.565	252.894	254.24	256.608	257.075	254.926	253.775	255.538	258.541	259.713	254.414	247.639	246.21	250.273	250.743	247.869	245.914	246.542	245.945	240.515	234.034	233.463
91.6065	92.6021	100.082	111.012	116.083	114.244	115.685	115.992	110.231	108.687	115.267	118.212	128.539	156.89	181.483	190.413	195.304	201.132	204.482	204.631	202.144	195.704	190.745	195.657	207.939	218.386	227.961	238.068	246.128	250.553	252.091	254.441	254.955	253.181	251.902	253.624	256.754	258.125	252.695	246.075	244.739	248.851	249.222	246.697	244.573	245.361	244.705	239.755	233.474	232.614
94.4819	95.2724	102.915	114.257	119.4	117.418	118.958	119.31	113.229	112.053	118.588	121.737	132.464	161.464	186.359	195.65	200.546	206.265	209.751	209.649	207.296	200.676	195.439	200.606	212.929	223.824	233.716	244.177	252.555	257.029	258.397	260.829	261.401	259.408	258.175	260.088	263.163	264.346	258.997	252.096	250.614	254.781	255.428	252.592	250.366	251.131	250.643	245.376	238.897	238.323
97.6219	98.3287	106.228	118.077	123.099	121.088	122.431	122.628	116.434	115.177	121.788	124.486	135.262	164.713	190.411	199.401	204.574	210.255	213.551	213.532	210.888	204.187	198.797	203.79	216.104	227.163	236.835	247.376	255.599	259.967	261.538	263.895	264.23	262.066	260.799	262.529	265.581	266.944	261.133	254.355	252.691	256.747	257.338	254.41	252.143	253.012	252.173	246.824	240.143	239.303
95.5227	96.1088	104.099	115.363	120.487	118.594	120.039	119.897	113.676	112.642	119.298	121.872	132.655	161.578	186.51	195.492	200.408	206.218	209.321	209.267	206.68	200.008	194.699	199.607	211.732	222.562	232.073	242.379	250.56	254.761	256.152	258.458	258.872	256.766	255.567	257.354	260.229	261.335	256.008	249.052	247.518	251.506	251.832	249.093	246.999	247.757	246.938	241.688	235.287	234.504
94.7289	95.1115	102.9	114.128	119.203	117.021	118.756	118.664	112.558	111.238	117.879	120.572	131.659	160.082	184.629	193.558	198.256	203.887	207.1	206.902	204.455	197.779	192.667	197.503	209.484	220.224	229.765	239.866	247.871	252.15	253.358	255.672	256.096	253.739	252.686	254.159	257.115	258.415	252.912	246.498	244.765	248.929	249.308	246.456	244.291	244.981	244.217	238.873	232.623	231.657
96.634	97.0418	105.193	116.842	122.125	119.912	121.523	121.483	115.063	113.774	120.339	123.022	133.973	163.074	188.749	197.743	202.485	208.254	211.64	211.601	209	202.093	196.722	201.783	214.173	225.049	234.717	245.145	253.343	257.707	258.96	261.365	261.709	259.479	258.239	259.966	262.991	264.115	258.446	251.657	250.118	254.178	254.667	251.885	249.614	250.524	249.733	244.26	237.928	236.984
95.7696	95.948	103.65	115.033	120.149	117.872	119.404	119.618	113.348	112.053	118.724	121.394	132.259	161.079	186.249	194.966	199.782	205.535	208.459	208.503	205.929	199.241	193.959	198.744	211.083	221.621	231.16	241.412	249.439	253.725	255.107	257.356	257.823	255.665	254.407	256.187	259.114	260.309	254.815	248.181	246.492	250.549	251.054	247.938	245.829	246.609	245.896	240.693	234.239	233.502
94.429	95.2724	103.035	114.142	119.132	117.206	118.222	118.414	112.364	110.74	117.335	120.617	130.97	159.255	184.423	193.308	197.894	203.687	206.791	206.593	204.032	197.563	192.259	197.156	209.144	219.641	229.093	239.303	247.394	251.494	252.951	255.204	255.579	253.472	252.286	253.851	256.869	258.133	252.469	245.889	244.354	248.265	248.522	245.965	243.821	244.425	243.77	238.541	232.3	231.366
95.5932	96.2375	104.084	115.148	120.53	118.339	119.909	120.118	113.84	112.37	119.086	121.976	132.684	161.592	186.661	195.492	200.345	206.065	209.199	209.03	206.815	200.081	194.682	199.711	211.994	222.494	232.219	242.517	250.553	254.841	256.233	258.534	258.949	257.065	255.727	257.192	260.336	261.533	255.933	249.077	247.646	251.739	252.014	249.274	247.11	247.74	247.12	241.664	235.327	234.504
96.634	97.2831	105.418	116.785	122.026	119.855	121.394	121.424	115.182	113.864	120.581	123.291	134.281	163.245	188.735	197.874	202.872	208.643	212.082	212.025	209.463	202.77	197.224	202.355	214.721	225.542	235.235	245.715	253.965	258.173	259.678	262.067	262.395	260.304	259.151	260.826	263.778	265.19	259.598	252.646	251.204	255.281	255.748	252.919	250.657	251.342	250.643	245.239	238.787	237.933
91.8006	92.393	100.367	110.983	115.999	113.919	115.541	115.522	109.859	108.34	114.558	117.69	128.011	155.693	179.712	188.755	193.365	198.66	202.074	201.739	199.564	193.005	187.974	192.675	204.609	214.771	224.112	234.162	241.892	246.207	247.431	249.752	249.928	248.031	246.726	248.36	251.214	252.599	247.202	240.645	239.318	243.033	243.595	240.915	238.754	239.447	238.485	233.591	227.467	226.453
90.1424	90.7039	98.1188	108.656	113.684	111.538	112.774	113.011	107.16	106.212	112.309	115.165	125.17	152.301	176.223	184.636	189.275	194.669	197.953	197.897	195.597	189.35	184.233	189.016	200.608	210.715	219.679	229.504	237.215	241.314	242.519	244.762	245.124	243.101	241.981	243.582	246.403	247.652	242.252	236.061	234.478	238.206	238.625	236.02	233.875	234.504	233.804	228.811	222.824	222.09
90.3717	90.7522	98.0739	108.714	113.726	111.722	113.033	113.231	107.309	105.849	112.233	114.822	124.847	152.216	175.838	184.136	188.712	194.21	197.246	197.174	195.048	188.673	183.51	188.186	199.735	209.692	218.737	228.356	235.783	239.973	241.111	243.418	243.636	241.654	240.373	241.96	244.796	245.865	240.716	234.243	232.956	236.482	237.086	234.288	232.115	232.724	231.985	227.016	221.035	220.314
87.3552	88.098	94.9263	105.353	109.943	107.925	109.314	109.546	103.715	102.408	108.625	110.923	120.746	147.199	169.699	178.162	182.47	187.629	190.53	190.513	188.144	181.841	177.099	181.376	192.404	202.058	210.783	220.073	227.173	231.091	232.316	234.1	234.523	232.423	231.18	232.681	235.379	236.343	231.184	225.151	223.609	227.208	227.569	224.964	222.835	223.462	222.523	217.763	212.159	211.145
77.1239	77.6098	84.1346	93.1324	97.0705	95.5704	96.4129	96.4779	91.6527	90.5592	95.8546	97.9883	106.625	129.615	149.852	157.173	161.028	165.462	167.828	167.536	165.554	160.074	155.699	159.341	169.091	177.514	184.877	193.073	199.275	202.609	203.391	205.121	205.093	203.245	202.152	203.353	205.424	206.354	201.977	196.548	195.1	198.272	198.449	196.009	194.082	194.426	193.691	189.364	184.317	183.469
56.9787	57.5504	62.4764	69.078	71.974	70.7331	71.2159	71.1792	67.2736	66.1825	70.1019	71.8793	78.0613	94.8583	109.966	114.893	117.571	121.022	122.547	122.231	120.759	116.547	113.272	116.02	122.99	128.717	134.03	139.875	144.15	146.337	146.895	147.926	147.805	146.46	145.472	146.188	147.496	147.907	144.599	140.772	139.673	141.565	141.635	139.755	138.14	138.176	137.583	134.42	130.65	130.077
54.1916	54.3171	58.8342	65.0857	67.796	66.4259	67.0789	66.7156	63.1135	62.4543	66.1168	67.3087	73.4471	89.1297	102.769	107.564	110.378	113.229	114.825	114.682	113.123	109.219	106.334	108.726	114.98	120.657	125.463	130.704	134.702	136.887	137.33	138.209	138.252	136.742	135.615	136.204	137.391	137.88	134.75	130.944	129.916	131.773	131.807	130.086	128.604	128.618	127.965	124.941	121.451	120.862
48.1057	48.2848	52.1793	57.4313	60.0468	58.8033	59.1652	59.1979	56.016	54.9526	58.3427	59.5716	64.3799	78.4562	90.1333	94.5098	96.6052	99.2083	100.464	100.142	98.6603	95.1488	92.3565	94.5093	100.179	104.882	109.03	113.569	116.932	118.606	118.992	119.71	119.478	118.029	117.149	117.541	118.655	118.886	116.161	112.888	111.984	113.431	113.336	111.602	110.318	110.186	109.562	106.863	103.896	103.335
46.5004	46.4831	49.9611	55.3777	57.5203	56.1963	57.075	56.9514	53.8092	53.0205	55.9727	57.1817	61.9923	75.2499	86.9056	90.5752	92.6897	95.1586	96.3547	95.9902	94.6931	91.2952	88.8111	90.7777	96.0465	100.662	104.662	109.034	112.037	113.764	113.917	114.734	114.497	113.233	112.348	112.683	113.705	113.74	111.311	108.329	107.264	108.544	108.59	106.939	105.601	105.571	104.774	102.366	99.5841	99.0262
49.3758	49.6521	53.7231	59.2408	61.8395	60.6452	61.4139	61.1948	58.029	57.4129	60.5768	61.8419	67.3535	81.8478	94.2675	99.2865	101.246	103.823	105.568	105.274	104.004	100.473	97.6705	99.8045	105.81	110.842	115.281	120.183	123.901	125.709	126.053	126.74	126.702	125.388	124.43	124.954	126.032	126.34	123.556	120.288	119.219	120.956	120.873	119.176	117.812	117.744	117.014	114.305	111.038	110.446
66.0634	66.446	72.3238	80.4087	83.6048	82.4504	83.6991	83.6303	79.2022	78.7256	83.2953	85.2325	93.1049	113.54	131.173	138.027	141.601	145.591	148.187	148.121	146.459	141.708	137.954	141.344	149.942	157.406	164.164	171.338	176.871	179.873	180.867	182.334	182.509	180.773	179.941	180.943	182.656	183.488	179.649	174.796	173.748	176.396	176.52	174.388	172.652	172.838	172.163	168.335	163.845	163.111
64.4935	65.0626	70.705	78.5274	82.0521	80.9202	81.926	81.9418	77.7261	77.035	81.3782	83.6194	91.1421	111.032	128.302	134.974	138.499	142.554	145.149	145.033	143.445	138.82	135.217	138.603	146.952	154.359	160.87	167.937	173.336	176.307	177.014	178.453	178.631	176.983	176.276	177.155	178.96	179.716	176.001	171.134	170.08	172.681	172.709	170.709	168.841	169.203	168.441	164.921	160.424	159.682
64.5817	65.32	70.705	78.6423	82.1651	80.5235	81.8828	81.9565	78.0392	77.2162	81.8763	83.709	91.4497	111.545	129.236	135.803	139.575	143.672	146.209	146.303	144.659	139.867	136.237	139.828	148.126	155.688	162.222	169.301	174.789	177.831	178.659	180.235	180.373	178.627	177.509	178.664	180.509	181.37	177.429	172.69	171.653	174.207	174.403	172.32	170.405	170.552	170.046	166.296	161.914	161.144
64.5464	64.9822	70.4652	78.2976	81.8828	80.5235	81.8828	81.8831	77.7559	77.2011	81.8159	84.0227	91.6108	112.115	129.799	136.553	140.238	144.284	146.795	147.088	145.381	140.76	137.079	140.594	149.185	156.532	163.332	170.356	175.981	179.027	179.918	181.352	181.615	180.066	178.917	179.986	181.853	182.652	178.656	174.145	172.816	175.431	175.708	173.518	171.72	172.02	171.278	167.591	163.159	162.605
60.2422	60.7355	65.609	73.1277	76.6602	75.4229	76.5205	76.6119	72.7906	72.205	76.6684	78.4812	85.9567	104.947	121.339	128.105	131.469	135.278	137.681	137.773	136.118	131.717	128.296	131.519	139.598	146.68	152.888	159.596	164.675	167.491	168.286	169.627	169.834	168.319	167.235	168.25	169.944	170.855	167.112	162.626	161.401	163.907	164.082	161.936	160.271	160.337	159.798	156.267	152.06	151.393
33.3584	33.4051	36.0218	40.0978	41.5985	40.9936	41.3053	41.1672	39.1967	38.485	41.0283	42.1257	46.0698	56.4681	65.4931	69.0339	71.1486	73.2859	74.4156	74.5099	73.5669	71.0074	69.1622	70.5642	74.7108	78.3282	81.4146	84.9006	87.4864	88.7824	88.933	89.3949	89.3692	88.4495	87.6409	87.9529	88.6097	88.7231	86.8791	84.4964	83.6977	84.6853	84.76	83.2846	82.1034	82.2126	81.5414	79.5492	77.252	76.8075
41.5611	41.9147	45.2097	49.9206	52.453	51.6482	52.6353	52.6052	49.9623	49.4885	52.4102	53.7911	58.5793	71.8726	83.2934	87.8776	90.8133	93.6047	95.2501	95.5564	94.5006	91.1237	88.8026	90.9147	96.2087	101.05	105.283	109.691	113.158	115.201	115.517	116.343	116.394	115.324	114.5	115.059	116.147	116.462	113.832	110.875	110.052	111.561	111.503	109.938	108.558	108.541	108.156	105.488	102.69	102.172
47.1178	47.5287	51.5198	57.0579	59.5528	58.7466	59.8138	59.7265	56.6124	56.5374	59.9579	61.4834	67.3682	82.4036	95.325	100.813	103.698	106.943	109.037	109.229	107.789	104.219	101.624	104.205	110.577	116.116	120.869	126.104	130.248	132.446	132.929	133.981	134.089	132.764	131.959	132.587	133.818	134.397	131.453	127.942	127.068	128.981	129.128	127.225	125.716	125.8	125.202	122.345	119.102	118.474
42.2491	42.4134	45.9442	50.9977	53.187	52.5834	53.0966	53.0163	50.4692	49.9112	53.3008	54.5529	59.7218	73.1979	84.8317	89.4699	92.3645	95.0645	96.6862	97.0022	95.8005	92.6489	90.1544	92.301	97.6995	102.648	106.919	111.539	115.016	116.98	117.377	118.253	118.275	117.196	116.293	116.86	117.951	118.381	115.919	112.609	111.813	113.491	113.396	111.791	110.566	110.557	109.959	107.316	104.542	103.97
36.0397	36.3006	39.0045	43.4295	45.5507	44.5357	44.8657	45.0435	42.6709	41.9416	44.8172	46.0689	50.347	61.6979	71.6738	75.5739	77.6535	80.4434	81.7839	81.7182	80.8754	78.1099	75.93	77.8017	82.3737	86.2756	89.8138	93.696	96.6026	98.1088	98.4316	99.1803	99.0533	98.1128	97.4982	97.6615	98.5675	98.8242	96.5451	94.0617	93.1722	94.4339	94.2853	92.8586	91.6223	91.7281	91.1354	88.9721	86.4276	86.0532
41.2965	41.8503	45.6444	50.7248	53.074	52.1866	52.7218	53.1191	50.5289	50.0621	52.9989	54.523	59.9855	73.3974	85.3948	90.1805	92.9649	95.8767	97.7688	98.0246	96.8115	93.8131	91.3703	93.7356	99.2754	104.464	108.825	113.561	117.228	119.263	119.696	120.541	120.704	119.554	118.709	119.407	120.704	121.128	118.615	115.307	114.533	116.146	116.197	114.557	113.403	113.383	112.821	110.293	107.42	106.856
43.5368	43.8129	47.8327	53.4103	55.77	54.8928	55.8498	55.6446	53.0935	53.0205	56.1085	57.5103	63.0763	77.4302	89.8861	94.7861	97.7435	100.88	102.983	103.291	102.079	98.8129	96.2421	98.8051	104.799	109.946	114.551	119.634	123.568	125.585	126.135	127.162	127.335	126.175	125.438	126.001	127.13	127.663	125.025	121.692	120.86	122.663	122.723	121.038	119.683	119.786	119.123	116.505	113.403	112.841
47.0472	47.6413	51.6547	57.5031	60.3715	59.4834	60.3472	60.2404	57.4922	57.2167	60.5919	62.5141	68.2471	83.5436	97.4677	102.932	106.125	109.58	111.754	111.873	110.456	107.089	104.396	107.026	113.52	119.193	124.36	129.838	134.036	136.369	137.026	138.133	138.353	137.167	136.271	136.828	138.44	139.022	135.943	132.467	131.677	133.626	133.665	131.904	130.535	130.508	130.074	127.206	123.729	123.204
49.4816	49.9095	54.4876	60.6625	63.378	62.5579	63.6626	63.6028	60.4892	60.2807	64.0638	65.83	72.0702	87.9469	102.302	107.972	111.554	115.065	117.167	117.78	116.503	112.765	109.905	112.732	119.607	125.706	131.094	136.705	141.266	143.632	144.302	145.548	145.777	144.471	143.632	144.42	145.972	146.575	143.531	139.774	138.749	140.806	140.883	139.108	137.576	137.821	137.17	134.202	130.792	130.047
47.7529	48.2204	52.554	58.4797	61.3737	60.4469	61.1832	61.3416	58.5061	58.1374	61.7391	63.3505	69.5361	85.0684	98.8411	104.287	107.701	111.192	113.334	113.422	112.324	108.704	105.977	108.702	115.281	121.15	126.281	131.787	135.952	138.2	139.027	140.18	140.319	139.054	138.152	138.986	140.505	141.032	137.98	134.268	133.362	135.376	135.576	133.723	132.372	132.541	131.901	128.993	125.684	125.179
43.8544	44.215	48.0126	53.4247	55.9958	54.9495	55.648	55.7474	52.8698	52.5979	55.9425	57.585	62.9884	77.3447	89.8586	94.5361	97.5934	100.88	102.718	102.878	101.828	98.4248	96.004	98.6116	104.474	109.692	114.332	119.288	123.048	125.213	125.712	126.762	126.826	125.829	125.07	125.684	126.941	127.382	124.775	121.497	120.561	122.214	122.42	120.77	119.299	119.465	118.892	116.116	113.04	112.55
46.8532	47.5448	51.7147	57.2446	60.2303	59.5401	60.1742	60.3725	57.5071	56.8695	60.3051	62.3199	68.2617	83.7003	97.1106	102.55	105.512	109.05	111.18	111.243	110.042	106.701	103.962	106.639	113.273	118.835	123.775	129.433	133.595	135.626	136.471	137.567	137.666	136.522	135.855	136.512	137.776	138.443	135.418	131.849	131.07	133.049	132.905	131.206	129.971	129.959	129.478	126.664	123.359	122.699
46.6239	46.8853	50.9803	56.7707	59.4117	58.6475	59.6697	59.5796	56.7019	56.2355	60.0333	61.7224	67.5439	82.6743	95.9294	100.918	104.336	107.837	109.666	110.097	108.944	105.347	102.848	105.495	111.759	117.244	122.344	127.722	131.73	134.036	134.603	135.898	135.97	134.808	134.071	134.728	136.088	136.647	133.706	130.166	129.052	131.161	131.116	129.379	128.023	128.34	127.642	124.722	121.506	120.908
48.5643	48.9443	53.4534	59.2264	61.8959	60.9994	61.8607	61.9876	58.8341	58.5147	62.3731	63.8583	70.0048	86.0231	99.8713	105.142	108.464	111.981	113.941	114.238	112.921	109.246	106.513	109.218	115.868	121.658	126.982	132.575	136.726	138.994	139.768	140.776	140.943	139.777	138.832	139.513	141.177	141.644	138.564	134.962	133.969	136.049	136.172	134.446	132.782	132.979	132.331	129.567	125.96	125.546
49.217	49.636	53.6332	59.8583	62.8134	61.8354	62.6968	63.1476	59.7735	59.4053	63.3543	64.7545	71.0595	87.1489	101.313	106.945	110.528	114.112	116.129	116.396	115.049	111.448	108.553	111.467	118.325	124.153	129.662	135.311	139.625	142.196	142.857	144.106	144.313	143.103	142.224	142.887	144.579	145.16	142.02	138.37	137.347	139.436	139.586	137.876	136.251	136.489	135.946	132.876	129.31	128.837
59.6071	60.1403	65.3691	72.6682	76.1238	75.2245	76.1602	76.5972	72.9695	72.6427	76.9854	79.1683	86.9381	106.486	123.632	130.5	134.434	138.739	141.526	141.801	140.287	135.995	132.615	136.258	144.542	152.088	158.635	165.763	171.449	174.324	175.236	176.845	177.081	175.859	174.956	176.085	178.066	178.913	175.167	170.736	169.516	172.276	172.493	170.355	168.747	169.034	168.483	164.962	160.637	160.041
59.8894	60.4781	65.7588	73.1421	76.4767	75.4229	76.8521	77.1111	73.4169	72.9446	77.6043	79.7658	87.5387	107.042	124.141	131.276	135.147	139.528	142.089	142.482	141.057	136.744	133.338	136.911	145.268	152.731	159.439	166.543	172.316	175.177	176.154	177.774	178.168	176.858	175.892	176.944	179.025	179.807	175.976	171.641	170.593	173.25	173.487	171.329	169.653	170.063	169.425	165.787	161.393	160.746
60.6655	61.395	66.838	74.2622	77.8318	76.7689	78.1638	78.3445	74.7886	74.0464	78.7063	80.9906	88.8277	108.653	126.256	133.079	137.298	141.788	144.475	144.858	143.301	138.748	135.31	138.91	147.447	155.21	161.886	169.099	174.962	178.079	178.94	180.733	180.929	179.382	178.525	179.653	181.541	182.413	178.656	174.026	173.03	175.793	175.959	173.966	172.404	172.653	172.138	168.399	164.042	163.348
59.6777	60.3976	65.6239	73.0128	76.5332	75.3946	76.7944	77.0083	73.5361	72.9144	77.4232	79.8404	87.3043	106.857	124.237	131.131	134.796	139.481	142.155	142.431	141	136.645	133.193	136.669	145.206	152.648	159.307	166.384	172.041	175.002	176.036	177.638	177.898	176.299	175.508	176.596	178.624	179.534	175.676	171.235	170.2	172.931	173.132	171.157	169.465	169.709	169.136	165.504	161.22	160.577
55.4793	56.4565	61.4422	68.202	71.6635	70.6906	71.706	72.1042	68.6603	67.9334	72.3964	74.7321	81.7526	100.131	116.202	122.578	126.44	130.487	132.92	133.167	131.958	127.846	124.631	128.029	135.875	142.677	148.907	155.718	160.727	163.605	164.551	165.904	166.133	164.985	164.035	164.924	166.887	167.637	163.873	159.674	158.827	161.243	161.455	159.54	157.998	158.177	157.507	154.245	150.089	149.625
60.8949	62.0384	67.3926	74.9085	78.5516	77.449	78.798	79.1373	75.3552	74.9521	79.7328	81.7224	89.8677	109.565	127.547	134.698	138.724	143.072	145.9	146.221	144.87	140.435	137.062	140.642	149.301	156.801	163.814	171.092	176.835	180.077	181.052	182.772	183.049	181.465	180.685	181.859	183.82	184.729	180.968	176.174	175.082	177.905	178.206	176.198	174.438	174.72	174.032	170.357	166.044	165.345
64.7934	65.6739	71.3195	79.4178	83.266	81.912	83.5261	83.8946	79.6645	79.0123	84.1708	86.5768	94.7016	115.977	134.648	141.988	146.142	151.053	153.832	154.214	152.651	147.89	144.306	148.178	157.388	165.354	172.666	180.22	186.291	189.637	190.75	192.361	192.864	191.388	190.518	191.56	193.892	194.78	190.692	185.884	184.565	187.653	188.025	185.772	183.939	184.488	183.916	180.03	175.291	174.706
64.4229	65.2557	70.765	78.5418	82.2639	81.1753	82.7189	82.8668	79.2022	78.5746	83.3556	85.7702	93.8813	114.595	133.398	140.566	144.691	149.429	152.429	152.655	151.149	146.428	142.656	146.445	155.457	163.419	170.511	178.212	184.201	187.522	188.454	190.202	190.605	188.966	188.182	189.329	191.434	192.323	188.347	183.389	182.47	185.291	185.518	183.471	181.564	182.008	181.393	177.539	172.784	172.203
57.3139	58.3225	63.4057	70.2843	73.9501	72.9576	74.2862	74.3947	70.9864	70.7107	75.0079	77.2265	84.7702	103.936	121.133	128.013	132.044	136.503	139.438	139.859	138.737	134.461	131.093	134.549	142.92	150.213	156.81	163.871	169.352	172.289	173.309	174.942	175.262	173.807	173.076	174.106	176.018	176.911	173.163	168.63	167.652	170.276	170.617	168.813	167.2	167.482	167.077	163.522	159.234	158.648
51.3868	52.1615	56.5859	63.0608	66.1869	65.1508	66.1707	66.7743	63.6503	63.2844	67.5055	69.4595	76.1278	93.59	109.211	115.577	119.51	123.906	126.358	126.858	126.017	122.07	118.994	122.226	129.703	136.432	142.4	148.728	153.729	156.517	157.446	158.89	159.163	157.987	157.33	158.095	160.036	160.705	157.304	153.356	152.345	154.744	154.989	153.224	151.751	152.179	151.784	148.526	144.682	144.283
54.315	55.0731	59.9134	66.9238	69.9838	69.2171	70.7258	71.0323	67.4973	67.2994	71.7322	73.821	81.1814	99.9741	116.559	123.302	127.566	132.218	134.809	135.398	134.288	129.976	127.157	130.769	138.764	145.889	152.391	159.466	164.928	167.87	168.938	170.676	171.16	169.813	169.028	170.172	172.084	173.089	169.582	165.332	164.12	166.898	167.462	165.504	164.013	164.58	164.14	160.602	156.577	156
54.2621	54.7192	59.6136	66.4499	69.6733	68.7921	69.9474	70.122	66.7219	66.5447	70.7057	72.3871	79.321	96.8533	112.411	118.499	121.924	125.755	128.192	128.396	127.114	123.261	120.227	123.476	131.032	138.031	143.941	150.548	155.667	158.427	159.432	161.147	161.414	160.354	159.674	160.747	162.593	163.592	160.167	156.156	155.047	157.761	158.066	156.335	155.152	155.722	155.332	152.223	148.56	148.224
52.1276	52.7085	57.6951	64.2958	67.4572	66.8226	67.8717	68.3894	65.0519	64.7636	69.1811	70.7441	77.5633	94.8583	110.406	116.433	119.935	123.895	126.204	126.538	125.42	121.709	118.867	122.001	129.711	136.567	142.597	149.104	154.264	157.115	157.935	159.63	160.157	158.899	158.378	159.62	161.495	162.334	159.107	155.006	154.269	156.813	157.237	155.49	154.494	155.03	154.637	151.754	148	147.933
55.1265	55.5557	60.4979	67.7424	70.9295	69.8689	71.0141	71.4435	68.0192	67.6768	72.1549	73.9704	80.7859	98.6916	114.581	120.631	124.514	128.439	130.644	131.102	129.936	125.942	122.863	126.232	134.013	140.981	147.359	154.05	159.339	162.081	163.092	164.726	164.976	163.931	163.251	164.437	166.437	167.406	163.89	159.776	158.759	161.467	161.731	159.988	158.724	159.274	159.021	155.765	151.997	151.722
54.809	55.7005	60.6928	67.5414	71.0142	70.0105	71.0717	71.4288	67.8253	67.6466	71.8379	73.9256	80.5075	98.6916	114.567	120.723	124.501	128.203	130.644	130.875	129.676	125.788	122.633	125.958	133.867	140.697	146.921	153.79	158.913	161.811	162.884	164.53	164.868	163.656	162.963	164.081	166.01	166.918	163.497	159.403	158.476	160.985	161.299	159.851	158.536	159.088	158.698	155.442	151.564	151.263
54.9854	56.0222	60.8127	67.7568	71.1271	70.1947	71.115	71.2526	67.9148	67.4805	71.4605	73.5073	80.3757	98.2356	113.977	119.946	123.113	127.061	129.33	129.677	128.511	124.398	121.188	124.41	132.306	139.032	145.131	151.754	156.946	159.703	160.669	162.174	162.54	161.431	160.666	161.728	163.593	164.634	161.035	156.976	156.202	158.718	159.069	157.369	156.058	156.591	156.118	153.161	149.317	149.074
54.3856	55.1214	60.1232	66.4069	69.6309	68.7921	69.9906	70.1514	66.8263	66.3032	70.3736	72.2377	79.1013	96.6823	112.054	118.157	121.436	125.272	127.386	127.849	126.431	122.494	119.623	122.855	130.429	137.224	143.174	149.761	154.64	157.392	158.365	159.947	160.358	159.064	158.378	159.522	161.626	162.425	158.956	154.904	154.038	156.64	156.908	155.249	154.204	154.701	154.282	151.438	147.819	147.574
54.6326	55.4592	60.318	67.0818	70.2802	69.2171	70.1636	70.5772	67.1394	66.8013	70.9775	72.7605	79.4529	97.0813	112.603	118.617	121.862	125.684	127.894	128.252	127.134	122.963	120.049	123.282	130.931	137.71	143.904	150.367	155.537	158.376	159.283	160.604	161.09	159.992	159.258	160.398	162.404	163.244	159.791	155.826	154.859	157.364	157.703	156.042	154.99	155.503	155.407	152.336	148.71	148.5
52.0571	52.6763	57.6951	63.8219	66.8503	66.0434	67.0933	67.435	64.2467	63.7222	67.5961	69.4745	75.952	92.906	107.329	113.261	116.708	120.528	122.834	123.295	122.146	118.604	115.772	118.688	126.188	132.757	138.594	144.894	149.826	152.557	153.386	154.918	155.284	154.032	153.578	154.713	156.405	157.222	154.057	150.067	149.318	151.753	152.189	150.613	149.436	150.138	149.94	146.973	143.562	143.54
56.0085	56.8587	61.6071	68.7764	71.9458	70.804	71.9366	72.4566	68.9138	68.4466	72.8795	74.8815	81.8259	100.117	116.01	122.039	125.602	129.769	132.136	132.63	131.592	127.584	124.478	127.949	135.952	143.035	149.477	156.188	161.443	164.327	165.47	167.044	167.343	166.196	165.515	166.725	168.756	169.689	166.077	161.695	160.913	163.51	163.866	162.22	161.074	161.703	161.618	158.451	154.654	154.561
67.2277	68.1029	74.1973	82.3618	86.2584	85.0858	86.5964	86.7872	82.9597	82.3783	87.3106	89.7882	98.4955	120.338	140.004	147.554	152.147	157.339	160.836	161.866	160.643	156.175	152.604	156.915	166.828	175.691	183.336	191.499	197.901	201.377	202.398	204.321	204.792	203.323	202.504	204.026	206.375	207.686	203.346	198.037	196.879	200.039	200.394	198.284	196.893	197.513	197.008	192.883	188.227	187.863
65.0756	65.4809	71.3645	79.4321	83.0825	81.9687	83.3819	83.7772	79.5004	79.1633	84.2614	86.4424	94.8188	116.02	134.936	142.185	146.93	152.077	155.5	156.186	155.212	150.76	147.384	151.62	161.088	169.44	176.902	184.885	190.983	194.355	195.403	197.178	197.529	196.106	195.239	196.743	198.949	200.067	195.834	190.856	189.611	192.566	193.116	191.097	189.596	190.317	189.788	185.951	181.55	181.158
66.0634	66.7517	72.1739	80.3943	84.2259	82.9888	84.4198	84.6728	80.6187	80.0236	85.2878	87.6224	95.9906	117.545	136.365	143.738	148.457	153.761	156.991	158.221	156.984	152.583	149.135	153.312	162.881	171.382	178.976	186.906	193.159	196.557	197.774	199.398	199.919	198.417	197.599	198.965	201.408	202.234	198.18	193.106	191.868	194.971	195.424	193.183	191.621	192.291	191.996	188.054	183.363	183.071
73.9486	74.7626	81.2269	90.131	94.431	93.261	94.4957	95.1124	90.4449	89.8347	95.4621	98.1676	107.372	131.31	152.462	160.726	165.519	171.148	174.843	175.343	174.076	168.918	164.924	169.504	180.354	189.54	197.98	206.96	213.972	217.725	218.876	220.872	221.369	219.576	218.834	220.329	222.955	224.289	219.573	213.852	212.75	216.356	216.497	214.33	212.496	213.204	212.83	208.615	203.37	203.025
77.7413	78.6876	85.1988	94.7408	99.1031	97.7807	99.2381	99.6641	94.7094	93.7139	99.7341	102.499	112.001	137.182	159.205	167.727	172.7	178.694	182.454	183.512	182.357	177.149	173.027	178.063	189.253	199.011	207.832	216.983	224.245	228.087	229.649	231.654	231.901	230.198	229.331	230.848	233.789	234.804	229.874	223.976	222.652	226.32	226.835	224.361	222.638	223.428	223.003	218.337	212.868	212.462
85.3972	85.9424	93.3375	103.458	108.419	106.792	108.118	108.298	103	101.985	108.203	111.088	121.332	148.197	171.718	180.978	185.885	191.75	195.733	196.431	194.711	189.134	184.428	189.46	201.211	211.649	220.935	230.775	238.494	242.54	243.889	246.196	246.659	244.642	243.645	245.286	248.14	249.488	244.206	237.812	236.35	240.284	240.725	238.063	236.105	236.79	236.294	231.31	225.386	224.822
89.7896	90.8004	98.3736	109.346	114.361	112.629	114.186	114.523	108.502	107.51	114.135	116.928	127.645	155.721	180.357	189.781	194.929	201.144	204.88	205.415	203.695	197.436	192.386	197.721	210.102	220.732	230.43	240.755	248.753	253.113	254.529	256.986	257.484	255.43	254.463	255.911	259.065	260.326	254.898	248.316	246.8	250.765	251.365	248.61	246.538	247.327	246.706	241.405	235.311	234.749
91.5536	92.1838	100.082	111.141	115.999	114.032	115.786	115.933	110.127	108.823	115.75	118.675	129.55	157.973	183.063	192.137	197.593	203.628	207.266	207.749	205.909	199.521	194.401	199.776	212.149	223.137	232.869	243.412	251.529	256.03	257.344	259.787	260.26	258.299	257.175	258.863	261.934	263.536	257.828	251.242	249.69	253.868	254.46	251.644	249.512	250.288	249.651	244.567	238.298	237.612
92.9119	93.3581	101.132	112.476	117.678	115.831	117.401	117.592	111.499	110.166	116.973	119.706	130.267	159.383	184.148	193.426	198.482	204.452	208.105	208.472	206.439	199.927	194.988	200.195	212.512	223.495	233.234	243.672	251.803	256.197	257.611	259.983	260.537	258.598	257.447	259.22	262.425	263.734	258.12	251.521	250.015	253.988	254.615	251.911	249.819	250.709	250.147	244.818	238.559	237.948
94.3584	95.2885	103.2	114.343	119.753	117.602	119.217	119.486	113.229	112.144	118.694	121.947	132.655	161.564	187.005	196.111	201.146	207.277	210.712	211.002	208.943	202.454	197.258	202.387	214.945	226.005	235.776	246.481	254.768	259.15	260.649	263.087	263.498	261.617	260.455	262.253	265.384	266.812	261.117	254.346	252.965	257.126	257.71	255.048	252.878	253.704	253.083	247.803	241.396	240.78
96.3871	96.9292	104.879	116.426	121.772	119.77	121.365	121.336	115.152	113.834	120.837	123.709	134.574	164.143	190.164	199.374	204.574	210.432	214.004	213.997	211.725	204.945	199.452	204.708	217.502	228.574	238.588	249.427	257.724	262.213	263.865	266.326	266.829	264.684	263.512	265.344	268.49	269.856	264.163	257.332	255.898	260.022	260.536	257.9	255.783	256.471	255.771	250.431	243.785	242.923
95.4874	96.6236	104.309	115.708	121.122	119.161	120.586	120.734	115.003	113.562	120.188	123.321	134.237	163.231	189.092	198.374	203.273	209.314	212.8	212.737	210.599	203.934	198.482	203.644	216.382	227.26	237.302	247.903	256.199	260.74	262.36	264.748	265.202	263.332	262.112	263.924	267.04	268.499	262.753	255.911	254.513	258.574	259.153	256.487	254.262	255.02	254.448	249.064	242.563	241.76
93.9703	94.9667	102.421	113.697	119.146	117.206	118.496	118.899	112.871	111.781	118.452	121.588	132.421	161.136	186.799	195.927	201.246	207.442	210.933	210.858	208.702	202.039	196.867	202.153	214.551	225.505	235.367	246.069	254.493	258.939	260.567	262.921	263.529	261.633	260.511	262.343	265.573	266.985	261.225	254.448	253.085	257.316	257.9	255.065	253.041	253.814	253.273	247.932	241.349	240.635
95.7873	96.1571	104.309	115.765	120.925	118.963	120.702	120.514	114.541	113.472	120.203	123.261	133.973	163.673	189.12	198.637	203.823	209.679	213.187	213.264	211.051	204.106	198.865	203.991	216.699	227.686	237.689	248.416	256.806	261.097	262.575	265.088	265.611	263.56	262.384	264.265	267.351	268.714	263.12	256.029	254.615	258.953	259.464	256.762	254.741	255.425	254.894	249.356	243.028	242.235
95.752	96.2054	104.144	115.521	120.586	118.41	120.125	120.191	114.034	112.793	119.464	122.469	133.387	162.704	188.268	197.69	202.597	208.501	212.104	212.128	209.809	203.032	197.615	202.959	215.393	226.528	236.331	246.864	255.172	259.471	260.893	263.426	263.93	261.79	260.599	262.57	265.556	266.977	261.384	254.228	253.008	257.204	257.727	254.815	252.793	253.552	252.909	247.519	241.184	240.566
94.182	94.6933	102.69	113.798	119.005	116.823	118.554	118.884	112.617	111.57	118.226	121.08	132.347	161.307	186.387	195.966	200.958	206.63	210.403	210.548	207.97	201.624	196.442	201.347	214.003	224.743	234.615	245.174	253.611	258.093	259.471	261.848	262.503	260.352	259.207	261.134	264.36	265.571	259.915	253.357	251.999	256.074	256.603	253.97	251.699	252.498	252.082	246.864	240.427	239.724
91.1655	91.7173	99.5877	110.667	115.293	113.394	114.878	115.052	109.068	108.083	114.633	117.585	128.011	156.562	181.085	190.163	194.879	200.732	204.173	204.331	202.077	195.559	190.507	195.488	207.699	218.259	227.786	238.011	246.006	250.393	251.758	254.2	254.793	252.89	251.726	253.502	256.639	258.009	252.561	245.982	244.585	248.636	249.248	246.525	244.445	245.226	244.721	239.577	233.521	232.943
90.3717	91.1543	98.7184	109.389	114.474	112.403	114.1	114.2	108.547	107.298	113.999	116.48	127.294	155.222	179.89	188.873	193.953	199.778	203.145	203.391	201.316	194.9	189.895	194.9	206.996	217.468	226.939	237.108	245.196	249.583	250.839	253.339	253.822	251.773	250.702	252.447	255.549	256.95	251.534	244.916	243.508	247.42	248.038	245.465	243.359	244.172	243.58	238.436	232.41	231.642
92.5238	93.2133	100.742	111.902	117.114	115.123	116.709	116.887	111.081	109.653	116.309	119.512	130.238	158.671	184.038	193.479	198.369	204.534	208.061	208.245	205.929	199.305	194.121	199.228	211.616	222.33	231.949	242.43	250.697	255.045	256.544	259.032	259.45	257.6	256.335	258.247	261.327	262.75	257.068	250.261	248.895	252.971	253.664	250.73	248.734	249.452	248.807	243.427	237.195	236.402
92.7884	93.7281	101.281	112.146	117.001	114.981	116.536	117.005	111.126	109.578	116.49	119.482	130.326	158.842	184.079	193.347	198.544	204.734	207.973	208.255	206.15	199.503	194.129	199.349	211.693	222.479	232.197	242.495	250.712	255.155	256.663	258.889	259.327	257.293	256.207	257.89	261.049	262.344	256.801	250.041	248.715	252.704	253.353	250.411	248.315	249.258	248.46	243.216	236.777	236.119
83.2627	84.1086	91.1192	100.945	105.652	104.015	105.364	105.449	100.197	99.4194	105.259	108.429	118.139	144.364	167.735	176.372	181.356	187.206	190.651	190.72	188.721	182.942	178.119	182.738	194.15	203.963	212.697	222.391	229.732	233.702	235.072	237.392	237.561	235.812	234.852	236.266	239.01	240.264	235.182	229.025	227.765	231.431	231.883	229.273	227.355	228.025	227.254	222.559	216.652	215.845
83.4744	83.9799	90.8794	100.973	105.61	103.816	105.105	105.64	100.033	99.1477	105.485	108.026	117.963	144.278	167.57	176.149	181.244	186.923	190.231	190.555	188.721	182.672	177.907	182.818	194.088	203.806	212.667	222.232	229.544	233.57	234.857	237.083	237.476	235.702	234.724	236.153	239.002	240.256	235.157	229.084	227.791	231.431	231.934	229.419	227.389	228.076	227.502	222.494	216.794	216.005
86.632	86.8432	94.1769	104.65	109.125	107.585	109.011	109.546	103.805	102.876	109.199	111.61	121.815	149.351	173.05	181.952	186.985	192.786	196.075	196.534	194.412	188.213	183.297	188.243	199.812	209.991	219.095	228.934	236.571	240.775	242.156	244.248	244.824	242.889	241.741	243.469	246.436	247.619	242.486	236.087	234.623	238.413	238.91	236.477	234.473	235.069	234.4	229.385	223.4	222.633
87.6375	88.4519	95.7357	106.301	111.313	109.243	110.626	111.117	105.385	104.204	110.618	113.507	123.763	151.318	175.536	184.399	189.425	195.269	198.727	199.002	197.002	190.632	185.669	190.459	202.246	212.403	221.585	231.584	239.405	243.582	245.03	247.389	247.73	245.735	244.621	246.437	249.345	250.555	245.19	238.649	237.394	241.206	241.65	239.045	237.19	237.87	237.212	232.063	225.843	225.213
85.2031	86.1998	93.2176	103.4	108.193	106.353	107.685	107.989	102.374	101.382	107.478	110.445	120.394	147.584	170.674	179.82	184.809	190.49	193.833	194.087	192.053	185.885	181.325	185.986	197.441	207.496	216.524	226.298	233.759	238.019	239.281	241.568	241.925	240.011	238.877	240.484	243.493	244.541	239.481	233.203	231.81	235.758	236.282	233.582	231.619	232.302	231.77	226.724	220.767	220.008
87.2847	88.2106	95.1062	105.784	110.508	108.775	110.366	110.779	105.266	104.31	110.754	113.642	123.939	151.247	175.316	184.307	189.512	195.34	198.925	199.013	196.906	190.568	185.814	190.846	202.508	212.851	222.22	232.4	240.121	244.362	245.964	248.084	248.617	246.773	245.758	247.492	250.648	251.863	246.568	240.222	238.882	242.671	243.24	240.734	238.591	239.287	238.791	233.737	227.586	227.118
86.8437	87.6154	94.9263	105.368	110.169	108.634	110.049	110.295	104.64	103.419	110.135	113.268	123.734	151.218	175.028	184.176	189.137	195.046	198.561	198.682	196.54	190.253	185.406	190.298	202.269	212.5	221.797	231.873	239.759	244.064	245.534	247.782	248.255	246.442	245.277	247.127	250.017	251.3	246.084	239.613	238.36	242.318	242.808	240.157	238.13	238.849	238.262	233.252	226.987	226.345
86.7026	87.7441	94.7914	105.296	110.226	108.379	109.963	110.339	104.774	103.495	110.044	112.985	123.5	151.061	175.261	184.044	189.037	194.999	198.108	198.434	196.232	190.162	185.338	190.362	202.168	212.485	221.753	231.735	239.542	243.75	245.23	247.57	248.077	246.214	245.149	246.827	249.87	251.325	246	239.512	238.343	241.999	242.566	240.053	238.036	238.722	237.956	233.041	226.963	226.269
87.4258	87.9371	95.4059	105.511	110.423	108.96	110.381	110.75	105.177	104.008	110.437	113.253	123.881	151.247	175.055	184.373	189.35	195.105	198.826	199.013	196.858	190.632	185.729	190.725	202.578	212.859	222.147	232.226	240.034	244.29	245.786	248.144	248.517	246.623	245.661	247.273	250.23	251.59	246.367	239.816	238.599	242.49	242.869	240.329	238.361	239.127	238.518	233.478	227.349	226.583
87.3376	88.0336	95.4359	105.727	110.579	109.03	110.51	110.618	105.028	103.978	110.422	113.537	123.793	151.247	175.303	184.662	189.525	195.481	198.738	198.971	196.8	190.577	185.584	190.523	202.439	212.792	221.987	232.053	239.846	244.027	245.408	247.752	248.232	246.332	245.349	246.989	249.935	251.408	246.025	239.537	238.215	242.025	242.48	239.838	237.865	238.612	237.956	232.847	226.837	226.001
89.8425	90.6074	98.4636	109.245	114.206	112.573	114.201	114.186	108.621	107.48	114.044	116.988	127.909	156.462	181.209	190.61	195.779	201.697	205.763	205.767	203.531	197.355	191.97	196.971	209.229	220.015	229.612	239.953	248.095	252.5	254.003	256.45	256.975	254.911	253.871	255.651	258.688	260.094	254.589	247.893	246.543	250.679	251.149	248.455	246.453	247.124	246.483	241.243	234.909	234.129
90.8304	91.6208	99.228	110.179	115.138	113.38	115.037	115.14	109.143	108.31	114.86	117.944	128.832	157.317	182.28	191.676	196.768	203.098	206.758	206.799	204.686	198.158	193.126	198.14	210.449	220.963	230.722	241.094	249.403	253.674	255.048	257.454	257.854	255.956	254.799	256.633	259.557	260.905	255.374	248.747	247.39	251.575	251.884	249.214	247.264	247.883	247.07	241.761	235.484	234.55
90.8304	91.6369	99.0331	109.662	114.841	112.799	114.748	114.978	109.262	107.827	114.528	117.6	128.217	156.662	181.785	191.308	196.317	202.451	206.117	206.107	204.128	197.716	192.488	197.439	209.8	220.239	229.845	240.213	248.326	252.529	254.018	256.329	256.705	254.879	253.807	255.416	258.426	259.523	254.214	247.538	246.218	250.179	250.587	247.895	245.812	246.475	245.896	240.563	234.325	233.448
89.7896	90.3822	97.879	108.484	113.67	111.722	113.076	113.466	108.025	106.453	113.305	116.181	126.635	154.752	179.478	188.873	193.903	200.061	203.576	203.742	201.644	195.415	190.38	195.271	207.329	217.878	227.304	237.657	245.557	249.7	251.032	253.618	253.976	251.923	250.846	252.423	255.574	256.81	251.534	244.916	243.491	247.395	247.873	245.224	243.069	243.843	243.034	237.749	231.456	230.846
89.3662	90.0444	97.879	108.398	113.331	111.652	113.148	113.393	107.905	106.966	113.29	116.375	126.84	155.237	179.849	189.255	194.566	200.555	204.427	204.589	202.375	196.065	190.864	195.956	208.093	218.491	228.005	238.177	246.331	250.692	252.054	254.472	254.924	253.016	251.974	253.745	256.688	257.943	252.469	245.863	244.491	248.662	249.006	246.172	244.128	244.838	244.142	238.986	232.678	231.894
90.654	91.8139	99.0931	110.107	115.138	112.87	114.489	114.744	109.203	107.857	114.648	117.585	128.217	156.747	181.813	191.505	196.693	202.827	206.448	206.541	204.59	198.014	192.794	197.906	210.14	220.806	230.379	240.776	248.832	253.186	254.781	257.144	257.53	255.508	254.335	255.984	259.352	260.623	254.998	248.35	247.039	251.032	251.452	248.834	246.521	247.276	246.574	241.356	234.948	234.091
90.16	91.1061	98.2837	109.26	114.587	112.388	114.028	114.2	108.517	107.464	114.271	117.062	127.748	156.234	181.236	190.729	195.892	202.356	205.863	206.056	204.118	197.536	192.369	197.592	209.762	220.373	229.999	240.35	248.427	252.836	254.277	256.593	257.145	255.139	253.943	255.619	258.492	259.953	254.406	247.775	246.389	250.549	250.803	248.231	246.034	246.804	246.103	240.725	234.593	233.777
89.6661	90.1892	97.6842	108.484	113.317	111.595	113.019	113.437	107.861	106.876	113.29	116.151	126.81	155.137	180	189.623	194.904	201.097	204.924	205.126	202.857	196.561	191.494	196.23	208.565	219.059	228.721	238.971	246.924	251.319	252.773	255.219	255.556	253.684	252.494	254.11	257.164	258.638	253.22	246.388	245.158	249.17	249.593	246.93	244.906	245.412	244.68	239.488	233.222	232.254
89.1722	89.8192	97.2045	107.809	112.512	110.816	112.485	112.893	107.19	106.242	112.882	115.867	126.459	154.581	179.423	188.689	194.091	200.402	204.007	204.114	202.077	195.74	190.711	195.738	207.823	218.304	227.903	238.22	246.273	250.568	252.151	254.585	254.978	253.118	251.926	253.461	256.516	257.976	252.469	245.889	244.423	248.42	248.945	246.318	244.077	244.779	244.093	238.954	232.52	231.963
90.4952	91.0578	98.6734	109.619	114.573	112.799	114.561	114.949	109.098	108.249	115.026	117.72	128.466	157.374	182.472	192.15	197.568	203.828	207.42	207.863	205.707	199.106	193.738	199.099	211.361	222.143	232.015	242.502	250.683	255.082	256.633	259.077	259.589	257.718	256.559	258.271	261.376	262.716	257.144	250.515	248.895	253.187	253.837	250.739	248.845	249.672	248.857	243.58	237.289	236.41
94.4643	95.5458	103.56	114.889	120.29	118.41	120.053	120.485	114.406	113.245	120.218	123.455	134.925	164.884	190.947	200.953	206.7	213.222	217.12	217.333	214.999	208.131	202.938	208.295	221.256	232.608	242.663	253.688	261.997	266.829	268.414	270.871	271.432	269.378	268.392	270.242	273.441	274.894	269.138	262.169	260.567	264.935	265.23	262.347	260.261	260.959	260.46	254.969	248.065	247.179
96.3694	97.2027	105.538	117	122.379	120.181	122.129	122.614	116.643	115.54	122.679	125.83	137.328	167.934	194.655	204.677	210.303	217.178	220.92	221.226	218.899	211.741	206.228	211.785	225.003	236.522	246.593	257.883	266.465	271.168	272.904	275.537	275.896	273.679	272.561	274.403	277.735	279.27	273.329	266.161	264.706	269.116	269.474	266.423	264.157	265.016	264.248	258.714	251.81	250.975
95.5403	96.2536	104.549	116.081	121.25	119.543	121.149	121.424	115.361	114.347	121.366	124.396	135.951	166.281	193.295	203.533	209.415	215.953	220.257	220.348	218.244	211.434	205.879	211.092	224.138	235.79	245.928	257.002	265.641	270.322	271.866	274.563	275.11	272.893	271.729	273.527	276.702	278.129	272.252	265.07	263.508	267.995	268.54	265.526	263.175	263.861	263.173	257.63	250.769	249.75
92.3298	93.1651	100.817	111.974	117.354	115.76	117.53	117.724	111.812	110.695	117.501	120.662	131.879	161.535	187.595	197.611	203.198	209.891	213.695	213.997	211.706	205.053	199.758	205.031	217.579	228.642	238.507	249.355	257.847	262.271	263.879	266.394	266.736	264.739	263.6	265.384	268.367	269.972	264.113	257.137	255.659	259.953	260.406	257.521	255.305	256.015	255.184	249.8	243.202	242.357
92.171	92.779	100.787	111.902	116.902	115.137	116.853	117.166	111.305	110.106	116.762	119.661	131.132	160.224	185.92	195.558	201.146	207.383	211.154	211.24	209.01	202.373	197.071	202.258	214.644	225.676	235.382	245.947	254.334	258.844	260.175	262.77	263.159	261.083	260.103	261.929	264.917	266.448	260.674	253.864	252.272	256.557	256.975	254.091	251.75	252.616	251.95	246.694	240.009	239.15
57.5256	58.2743	63.4656	70.83	74.2324	73.2126	74.5601	74.8793	71.061	70.8012	75.491	77.346	84.5211	103.636	120.24	126.763	130.518	134.49	137.228	137.815	136.609	132.403	129.129	132.704	141.205	148.615	155.422	162.708	168.159	171.422	172.531	174.466	175.146	174.019	173.268	174.649	177.157	178.102	174.407	170.009	169.071	171.845	172.311	170.381	168.798	169.11	168.483	164.776	160.384	159.904
53.6094	54.1401	58.6094	65.2436	68.3324	67.1769	68.2465	68.1104	64.8432	64.1448	68.532	70.4454	77.241	94.4878	110.076	116.604	120.31	124.189	126.601	127.271	125.766	121.944	118.79	121.928	129.649	136.447	142.297	148.902	153.896	156.663	157.639	159.252	159.594	158.475	157.906	158.857	160.978	161.879	158.623	154.473	153.465	156.253	156.459	154.982	153.657	154.153	153.579	150.411	146.589	146.035
76.577	76.9503	83.4452	92.5292	97.0282	95.2587	96.6579	97.0799	92.443	91.6007	97.3943	100.109	109.745	134.773	156.926	165.937	171.023	176.669	180.101	180.682	178.842	173.25	168.818	173.227	184.031	193.633	202.201	211.386	218.519	222.574	223.84	225.983	226.543	224.883	223.899	225.536	228.233	229.543	224.957	219.172	217.829	221.605	221.891	219.561	217.691	218.324	217.875	213.217	207.744	206.989
79.717	80.3123	87.4771	96.8519	101.616	100.076	101.516	101.852	97.0056	96.0987	102.361	105.203	115.443	141.471	164.768	174.346	180.105	185.687	189.723	190.235	188.278	182.6	177.907	182.649	193.934	203.881	212.704	222.29	229.725	233.797	235.206	237.392	237.869	236.134	234.932	236.615	239.428	240.752	235.742	229.625	228.253	232.061	232.47	229.902	227.987	228.498	227.808	223.19	217.125	216.51
24.3442	24.3486	26.699	29.7867	31.2099	30.764	31.0708	30.9038	29.6985	29.4438	31.2163	32.1779	35.0544	43.0729	50.3162	52.9667	54.4611	56.0749	57.337	57.5633	56.8989	55.259	53.8155	55.1865	58.6125	61.9255	64.4192	67.3749	69.637	70.6839	71.0768	72.0514	72.1136	71.5133	71.1428	71.4638	72.3001	72.6656	71.2533	69.0955	68.6308	69.7909	69.7721	68.8245	68.0132	67.7958	67.2828	65.7747	63.93	63.7273
61.7239	62.4728	68.0671	75.9425	79.4268	78.4549	80.0665	80.4148	76.5034	76.0841	80.6989	82.7083	90.8931	111.503	129.442	136.461	140.25	144.896	147.855	148.266	146.893	142.484	139.017	143.125	152.228	160.297	167.539	175.331	181.425	184.89	186.216	188.382	188.862	187.598	187.006	188.705	191.18	192.456	188.497	183.651	182.736	185.903	186.383	184.169	182.606	183.071	182.385	178.397	173.817	173.06
63.8584	64.1779	69.416	77.2062	80.6406	79.5884	80.5999	80.5763	76.2648	75.8728	80.8649	83.2908	91.2153	111.973	130.239	137.435	141.927	147.003	149.744	150.197	148.789	144.154	140.488	144.189	152.9	160.842	167.926	175.28	181.389	184.467	185.386	187.189	187.575	186.167	185.126	186.345	188.532	189.511	185.525	180.809	179.811	182.499	182.865	180.722	179.163	179.705	178.995	175.064	170.498	169.976
73.5782	74.0709	80.0878	89.1114	93.1889	91.9575	93.3858	93.4386	88.6109	88.1744	93.8922	96.9278	105.951	130.541	152.091	160.634	166.12	172.125	175.55	175.963	174.528	168.864	164.728	169.198	179.574	188.808	197.257	206.266	213.278	217.003	218.379	220.54	220.991	219.505	218.522	220.061	222.66	223.917	219.348	213.708	212.527	216.072	216.704	214.313	212.615	213.102	212.615	208.073	202.668	201.968
79.1172	79.894	86.7276	96.4785	101.093	99.3534	100.982	101.455	96.439	96.0987	102.3	105.113	115.312	141.984	165.331	174.977	180.731	186.888	190.916	191.66	189.8	183.854	179.131	183.995	195.417	205.375	214.544	224.196	231.727	235.875	237.265	239.567	240.066	238.25	237.06	238.919	241.633	242.911	237.903	231.68	230.382	234.069	234.649	232.151	230.149	230.75	229.983	225.058	219.277	218.585
22.4038	22.74	24.5707	27.4602	28.6974	28.0011	28.3465	28.3636	27.0295	26.8929	28.5293	29.1309	32.1101	39.5816	46.3468	48.9663	50.1954	52.0841	53.1061	53.1536	52.6139	50.9271	49.4028	50.8182	53.9159	56.7866	59.0365	61.5908	63.6149	64.4785	64.8679	65.4975	65.3825	64.7907	64.4219	64.7156	65.3583	65.5841	64.0915	62.3381	61.8584	62.6195	62.6065	61.6979	60.8784	60.6	60.1866	58.5357	56.9143	56.5176
58.8923	59.548	64.4675	71.7192	75.1138	73.926	75.0395	75.3217	71.5623	71.1658	75.6801	77.4856	84.7402	103.882	120.416	126.801	130.414	134.576	136.989	137.329	136.021	131.749	128.451	131.921	140.229	147.496	154.019	161.09	166.524	169.593	170.653	172.369	172.841	171.691	170.901	172.175	174.347	175.266	171.685	167.223	166.292	168.945	169.32	167.41	165.882	166.205	165.583	161.856	157.547	156.944
54.1739	54.5584	59.3288	65.9186	69.151	67.942	69.0249	69.197	65.6484	65.1863	69.7849	71.5208	78.1785	95.8843	111.766	117.854	121.511	125.084	128.026	128.221	126.98	123.054	119.955	123.234	130.985	138.001	144.087	150.707	155.819	158.581	159.802	161.449	161.861	160.55	159.978	161.185	163.257	164.171	160.709	156.536	155.526	158.511	158.706	156.835	155.716	156.161	155.58	152.514	148.513	147.933
84.815	85.669	92.5581	102.668	107.713	105.942	107.829	107.843	102.329	101.397	108.021	110.804	121.683	148.881	172.844	181.978	187.799	193.904	197.622	198.104	195.943	189.874	184.896	190.104	201.844	212.045	221.432	231.475	239.282	243.597	245.245	247.306	248.054	246.309	245.173	246.924	249.87	251.126	245.758	239.41	238.3	242.094	242.549	239.846	237.874	238.756	238.221	232.96	226.884	226.039
50.8752	51.6951	56.436	62.8741	66.1022	64.8674	66.1996	66.6568	63.4416	62.9071	67.0376	68.6978	74.8241	92.2932	107.247	113.077	116.307	120.186	122.459	122.892	121.895	118.081	115.143	118.406	126.142	132.884	138.901	145.428	150.498	153.367	154.712	156.451	156.919	155.904	155.25	156.578	158.774	159.836	156.628	152.553	151.764	154.468	154.695	153.241	151.905	152.196	151.792	148.535	144.571	144.145
33.0762	33.2443	36.1867	40.0978	41.9091	41.4186	42.2279	42.1069	39.9124	39.7378	42.0246	43.5596	47.6957	58.5629	68.1027	72.0078	74.3135	76.688	78.3704	78.3826	77.6111	75.2129	73.4134	75.4483	80.0177	84.2813	87.8929	91.9123	95.1278	96.8254	97.3869	98.2743	98.6523	97.9477	97.4502	98.205	99.2314	99.5605	97.6219	95.0259	94.472	95.994	95.8843	94.7199	93.8097	93.8034	93.2113	90.8324	88.2407	87.8441
51.3515	52.0329	56.466	62.8454	65.7634	64.9666	65.9833	66.1282	63.0837	62.6807	66.4187	68.5335	75.0584	92.3075	107.563	113.472	116.883	121.116	123.552	123.904	122.791	118.983	116.129	119.389	126.914	133.564	139.515	145.926	150.867	153.724	154.764	156.398	156.556	155.495	154.938	156.116	158.159	159.133	155.726	151.699	150.951	153.46	153.641	151.966	150.307	150.669	150.072	146.755	142.821	142.323
52.9391	53.4967	58.3995	64.8559	67.7113	66.8935	67.6699	68.0664	64.9774	64.5523	68.7735	70.4005	77.1531	94.4308	110.049	115.867	119.485	123.412	125.706	126.093	125.111	121.321	118.11	121.436	129.116	135.805	142.005	148.555	153.513	156.32	157.409	159.086	159.502	158.341	157.762	158.955	160.962	161.888	158.564	154.388	153.636	156.158	156.415	154.784	153.401	153.681	153.165	149.926	146.085	145.538
45.5831	45.9523	50.1109	55.7224	58.7341	57.8965	58.949	58.9923	55.8967	55.7374	59.6258	61.0055	66.6797	81.6341	95.0778	99.8787	103.348	106.778	108.683	109.064	108.174	104.86	102.372	105.285	111.867	117.729	123.198	128.877	133.357	135.823	136.863	138.322	138.877	137.937	137.359	138.507	140.325	141.09	138.498	134.919	134.02	136.29	136.622	135.101	134.09	134.295	133.729	130.789	127.426	127.039
63.2586	63.8079	69.2661	77.3498	81.2758	80.0985	81.5945	81.9124	77.7261	77.5331	82.8424	85.113	92.5044	113.74	132.436	138.948	143.128	147.757	150.551	150.94	149.839	145.164	141.568	145.575	154.994	163.12	170.577	178.566	184.809	188.295	189.654	191.833	192.378	191.199	190.518	192.03	194.581	196.013	191.953	186.991	185.874	188.981	189.425	187.211	185.58	185.863	185.173	180.993	176.15	175.556
51.8101	52.4833	57.3653	64.0517	66.8079	66.2134	67.3383	67.6259	64.6195	64.3863	68.366	69.7583	76.6844	93.9463	109.087	115.104	118.334	122.141	124.602	124.999	123.889	120.112	117.226	120.453	128.266	135.073	141.136	147.652	152.797	155.635	156.683	158.354	158.893	157.743	157.074	158.444	160.528	161.433	158.013	153.948	153.115	155.804	156.052	154.025	152.7	152.82	152.024	148.535	144.524	144.038
60.348	61.3467	66.7481	74.5925	78.5093	77.5057	79.1728	79.2254	75.9069	75.42	80.5177	82.9323	90.8931	111.446	130.129	136.987	141.414	146.203	149.049	149.67	148.501	144.154	140.794	144.664	154.028	162.276	169.678	177.663	184.021	187.464	188.883	191.153	191.792	190.633	190.03	191.56	194.22	195.475	191.41	186.56	185.609	188.705	189.062	187.004	185.375	185.686	184.726	180.532	175.669	174.959
40.732	41.0943	44.7001	49.7483	52.0154	51.2232	52.0443	52.0473	49.3509	49.0961	52.1083	53.5671	58.3596	71.9296	83.1972	87.7197	90.5506	93.4399	95.0181	95.2983	94.4235	91.2501	88.9471	91.2613	96.7417	101.595	106.057	110.723	114.423	116.302	116.799	117.875	117.936	116.928	116.405	117.046	118.254	118.729	116.236	112.913	112.079	113.629	113.794	112.222	110.925	110.996	110.174	107.292	104.18	103.733
33.7465	34.2416	37.3708	41.6488	43.5182	42.7505	43.7126	43.8248	41.5228	41.2472	43.7455	44.9039	49.3803	60.8429	70.7123	74.3501	76.7278	79.3132	80.7344	81.016	80.0858	77.4782	75.4709	77.5116	82.3428	86.7014	90.3688	94.3459	97.5425	99.1151	99.8394	100.766	100.888	99.9133	99.4905	100.249	101.362	101.637	99.6669	97.0134	96.2506	98.0282	97.8551	96.4779	95.1512	95.423	94.5925	92.2802	89.6753	89.2142
54.6149	55.2823	60.5129	67.527	71.0566	70.2656	71.5186	71.9427	68.3323	68.0843	72.5172	74.7023	82.031	100.601	116.889	123.197	127.028	131.123	133.936	134.211	133.094	129.064	126.068	129.617	137.891	145.089	151.522	158.708	164.234	167.44	168.515	170.344	170.89	169.883	169.236	170.731	172.895	173.925	170.359	166.026	165.026	167.88	168.119	165.935	164.526	164.74	163.735	159.842	155.339	154.806
35.1224	35.5607	38.6598	43.2141	45.3108	44.5924	45.4856	45.4693	43.3717	43.0736	45.5418	46.8606	51.5189	63.0232	73.3906	77.3636	79.4298	82.1033	83.4299	83.7113	82.9264	80.33	78.3362	80.4292	85.3632	89.9729	94.006	98.2308	101.627	103.337	103.855	105.055	105.329	104.45	103.979	104.791	106.132	106.683	104.316	101.665	100.945	102.657	102.73	101.338	100.235	100.324	99.4474	97.0604	94.2474	93.7987
42.5843	43.3303	47.5329	53.2667	56.137	55.7996	56.8876	57.2597	54.4206	54.2281	58.0257	59.6761	65.6543	80.6508	93.2511	98.5496	101.784	104.835	106.949	107.143	106.229	103.208	100.935	103.818	110.43	116.288	121.599	127.419	131.889	134.335	135.329	136.812	137.335	136.412	136.095	137.266	138.891	139.609	137.012	133.448	132.729	134.713	134.763	132.93	131.398	131.309	130.239	126.623	122.752	122.286
43.0429	43.9898	48.1924	54.2145	56.9274	56.2955	57.6516	57.9792	55.3599	55.3601	58.9465	60.4229	66.5479	81.9048	94.9405	100.076	103.173	106.648	108.794	109.271	108.569	105.212	102.797	105.865	112.6	118.596	124.148	129.881	134.434	137.069	138.123	139.674	140.272	139.463	138.96	140.243	141.89	142.902	139.808	136.306	135.56	137.755	137.892	136.11	134.525	134.515	133.2	129.802	126.11	125.301
39.215	39.8235	43.4561	48.6281	51.0556	50.4014	51.4965	51.8417	49.3658	48.8244	52.1536	53.7015	58.6086	72.0151	83.2384	87.2592	89.9127	92.9455	94.5872	94.7199	93.8169	90.7627	88.5475	91.1081	96.8421	101.73	106.21	111.041	114.792	116.791	117.533	118.532	118.707	117.95	117.309	118.149	119.516	119.994	117.338	114.436	113.464	115.25	115.151	113.54	112.036	112.016	110.944	107.907	104.661	104.124
35.44	36.3971	39.649	44.3917	46.7364	46.0375	47.3163	47.7305	45.4145	45.232	48.1684	49.8628	54.8001	67.0845	78.1016	81.9692	84.5336	87.9187	89.7155	90.207	89.4164	86.7828	84.6109	87.3443	92.7635	97.8457	102.354	107.272	110.931	113.269	114.132	115.384	115.761	115.308	114.996	115.886	117.492	118.108	115.643	112.846	112.326	114.138	114.157	112.748	111.566	111.603	110.836	108.061	104.897	104.529
46.8179	47.7218	52.3142	59.0541	62.2488	61.8637	63.3022	63.8671	61.4286	61.2467	65.6035	67.4282	74.2235	91.424	106.56	112.709	116.032	119.998	122.492	123.15	122.454	118.974	116.503	119.937	127.895	135.028	141.268	148.071	153.426	156.48	157.757	159.781	160.589	159.552	159.106	160.488	162.904	164.006	160.818	156.68	155.902	158.382	158.749	156.766	155.28	155.199	154.075	150.217	145.864	145.232
69.2563	70.9501	78.0793	87.7614	92.8078	92.4817	94.784	95.7585	92.0702	92.0384	98.6472	101.857	111.635	137.082	159.631	168.095	173.313	179.459	183.228	184.338	183.291	178.43	174.463	179.715	191.539	202.088	211.44	221.611	229.551	233.95	235.85	238.865	239.951	238.745	238.421	240.354	243.616	245.311	240.558	234.387	232.973	236.939	237.06	233.952	231.619	231.096	228.999	222.81	215.958	215.041
45.4067	46.5314	50.9953	57.4744	60.6538	59.8093	61.558	62.5603	59.9972	59.6166	63.9581	65.9196	72.2753	88.8304	103.909	109.419	112.78	117.078	119.84	120.341	119.642	116.366	113.833	117.519	125.362	132.19	138.266	145.06	150.585	153.556	154.816	156.813	157.528	156.776	156.578	158.127	160.487	161.466	158.264	154.456	153.79	156.373	156.58	154.715	152.973	152.989	151.867	147.774	143.2	142.874
30.3596	31.2818	34.2382	38.1734	40.4834	39.8743	40.772	41.1819	39.3458	39.0133	41.8133	43.2907	47.4028	58.0214	67.4297	71.2972	73.3377	75.9346	77.5418	77.9075	77.3126	74.9061	73.4814	75.6579	80.543	84.7817	88.7036	92.9739	96.2701	98.1525	98.8095	99.9731	100.41	100.008	99.8745	100.654	102.116	102.746	100.585	98.1467	97.6273	99.1659	99.0652	97.8739	96.8602	96.6715	95.8579	93.089	90.2665	89.9642
52.7274	54.3653	60.0932	67.6275	71.8046	71.4132	73.5367	74.9967	72.0749	72.3106	77.4987	80.408	88.5494	109.009	127.272	134.132	138.599	143.848	147.237	148.359	147.836	143.739	140.922	145.591	155.426	164.069	172.132	180.451	187.332	191.277	193.062	195.721	196.75	195.901	195.831	197.651	200.662	202.069	197.971	193.343	192.501	195.738	196.029	193.631	191.382	191.093	189.515	184.253	178.633	177.783
29.6716	30.0592	33.2939	37.4267	39.6507	38.8825	39.835	40.11	38.317	38.1228	40.7113	41.7075	45.7182	56.3114	65.1909	68.5207	70.4856	72.5442	73.9626	74.4273	73.5476	71.2691	69.6638	71.5152	75.9777	79.8669	83.4377	87.2403	90.1106	91.7065	92.356	93.2079	93.5713	92.601	92.0015	92.641	93.8796	94.2907	92.0627	89.6216	88.8967	90.1155	90.0413	88.5154	86.9398	86.4726	85.4534	82.6874	79.9085	79.3562
26.4611	27.1798	29.9215	33.5205	35.4162	34.972	35.2944	35.6904	33.963	33.9267	35.8808	36.8979	40.3131	49.3715	57.6918	60.4147	62.0918	63.7504	64.8379	64.7819	64.2651	62.1901	60.5663	62.0291	66.0591	69.1484	72.2267	75.3831	77.7194	78.9894	79.5085	80.1455	80.1785	79.4625	78.8398	79.3718	80.1189	80.5248	78.5571	76.4027	75.6597	76.6519	76.4276	75.3048	74.0031	73.2706	72.2452	69.9888	67.5088	66.9419
32.7234	33.6142	36.9811	41.8498	44.2804	43.6147	44.8081	45.3665	43.5208	43.5868	46.8249	47.9808	52.6321	65.0468	75.7667	79.719	82.4696	85.0816	86.8544	87.3155	86.9417	84.4454	82.4938	84.9425	90.3611	95.3658	99.8927	104.614	108.162	110.243	111.042	112.318	112.808	112.25	111.804	112.658	114.172	114.849	112.505	109.623	108.744	110.354	110.388	108.904	107.071	106.719	105.402	102.318	98.8431	98.3909
41.7375	43.0085	47.6528	53.6975	56.6734	56.4372	58.43	59.1391	56.7317	56.9601	61.0749	63.1115	69.2138	85.2964	99.2257	104.695	108.276	112.158	114.538	115.529	114.943	111.628	109.259	112.942	120.271	126.797	132.971	139.218	144.215	147.307	148.577	150.441	151.136	150.486	150.209	151.606	153.676	154.715	151.528	147.952	147.078	149.641	149.673	147.286	145.309	145.042	143.158	138.982	134.56	133.69
51.3162	53.2393	58.7742	66.4643	70.4496	70.5773	72.6718	73.734	70.8373	71.2691	76.4722	79.1235	87.3189	107.641	125.212	132.5	136.998	142.012	145.403	146.272	145.525	141.843	138.992	143.536	153.132	161.709	169.452	177.728	184.469	188.244	190.002	192.55	193.643	192.756	192.599	194.293	196.99	198.47	194.632	189.909	188.969	192.058	191.984	189.34	186.922	186.344	183.932	178.316	172.556	171.484
22.6684	23.5282	25.7847	28.8389	30.7017	30.0414	30.5087	30.9625	29.7284	29.3683	31.1106	32.1481	35.2155	43.0729	50.1102	52.5851	53.7981	55.604	56.5417	56.6338	55.9552	54.2663	52.8037	54.1951	57.5233	60.469	62.9731	65.6779	67.6561	68.737	69.1208	69.6201	69.7003	69.0601	68.5824	68.9008	69.6611	69.9273	68.1065	66.0593	65.4498	66.3258	66.0294	64.8001	63.4418	62.7933	61.6091	59.4658	57.2847	56.6477
26.9021	27.2763	30.626	34.7268	36.1501	36.0346	36.8079	37.2321	35.5287	35.7681	37.9488	39.1384	42.8472	52.307	61.043	64.3361	66.3075	68.2238	69.3561	69.6356	69.0219	66.7476	65.1831	67.0099	71.0184	74.8101	77.9966	81.4778	84.2259	85.6323	86.0582	86.9259	87.0869	86.3187	85.7447	86.2335	87.1672	87.598	85.8023	83.2701	82.3124	83.4785	83.1869	81.6386	80.3689	79.4709	78.0429	75.3351	72.8455	72.0852
44.9657	47.1427	52.2093	59.2121	63.1945	63.4931	65.8824	67.1267	64.7835	65.1863	70.3435	73.2982	81.0788	100.06	117.136	124.091	128.429	133.701	137.228	138.507	138.207	135.057	132.726	137.241	146.914	155.405	163.04	171.388	178.1	182.075	184.112	186.827	188.246	187.692	187.726	189.913	192.893	194.681	191.068	186.679	186.036	188.929	189.14	186.728	184.298	183.687	181.443	175.776	170.08	169.165
30.3948	31.4909	35.1375	39.8249	41.9232	41.7445	43.2081	43.9276	42.1043	42.2585	45.2852	46.8456	51.929	63.9352	74.0773	78.4426	80.9309	83.7514	85.6945	86.2931	85.844	83.579	81.8136	84.3381	90.0366	94.97	99.3888	103.95	107.758	109.769	110.82	112.137	112.546	111.943	111.668	112.634	114.033	114.824	112.513	109.64	108.94	110.535	110.406	108.318	106.661	106.01	104.203	100.563	97.1246	96.3933
33.0409	34.0647	37.9703	42.9843	45.7766	45.7825	47.1289	47.4809	45.8022	46.0169	49.2402	50.8785	56.133	69.0226	80.519	84.9563	87.736	90.5557	92.3999	93.4084	92.7962	90.3386	88.539	91.1001	97.0352	102.462	107.328	112.327	116.353	118.519	119.607	120.964	121.644	120.938	120.501	121.613	123.278	123.949	121.47	118.292	117.526	119.353	119.205	117.194	115.539	114.53	112.589	108.797	105.307	104.414
37.1687	38.5527	42.4369	47.9963	51.112	51.3365	52.8803	53.5009	51.2744	51.5564	55.2481	57.2564	63.047	77.6155	90.5041	95.3125	98.344	102.081	104.286	104.768	104.409	101.529	99.3114	102.384	109.263	114.936	120.335	125.96	130.263	132.767	133.803	135.423	136.001	135.178	134.863	135.652	137.391	138.252	135.259	131.672	130.651	132.506	132.118	129.957	127.801	126.754	124.871	120.452	116.185	115.275
32.5117	34.2577	38.3001	43.2572	46.4823	46.4343	47.691	48.8757	47.3827	47.481	51.1271	52.8949	58.1691	71.9296	84.0351	88.7856	91.8266	95.1704	97.5478	98.479	97.967	95.4918	93.4618	96.4275	103.084	108.856	114.003	119.526	123.8	126.248	127.498	129.231	129.702	129.241	128.854	129.902	131.81	132.668	130.025	126.673	125.803	127.627	127.33	125.364	123.272	122.063	119.983	115.825	111.534	110.622
40.9084	42.6386	47.443	53.7119	57.492	57.8824	59.8571	61.136	58.9982	59.2242	63.9128	66.771	73.7108	90.968	106.354	112.446	116.157	120.81	123.906	125.071	124.611	121.375	119.173	123.081	131.534	139.114	145.759	152.801	158.559	161.869	163.544	165.806	166.68	166.314	166.083	167.568	170.067	171.17	167.696	163.522	162.572	164.95	164.635	162.083	159.339	158.312	155.597	150.104	144.564	143.555
21.2219	21.9196	24.3908	27.4028	29.0503	28.8087	30.0618	30.4192	28.789	28.84	30.9295	32.1929	35.0837	43.1441	49.6157	52.2034	53.8106	55.5334	56.5085	56.6132	56.1959	54.3926	53.1183	54.6545	58.095	60.9022	63.5209	66.3639	68.2634	69.4881	69.8617	70.3676	70.4867	69.8778	69.5426	69.7929	70.4888	70.614	68.8911	66.9727	66.2536	66.7999	66.3578	64.9122	63.4589	62.5993	61.2287	58.7298	56.2836	55.6221
39.3561	41.3838	46.4538	52.6348	56.0805	56.5364	58.3579	59.7118	57.7755	58.3789	62.5543	64.8292	71.9091	88.9302	103.758	110.09	113.906	118.315	121.376	122.469	122.281	119.164	117.03	121.017	129.294	136.828	143.407	150.599	156.303	159.776	161.514	163.805	164.876	164.104	164.067	165.914	168.502	169.887	166.552	162.389	161.521	164.269	164.264	161.678	159.296	158.211	155.605	150.071	144.997	143.777
42.5313	44.2954	49.7362	56.7133	60.6961	60.9711	63.2878	64.4837	62.4276	63.0429	68.1395	70.6545	78.0467	96.8391	113.276	119.894	124.351	128.992	132.191	133.849	133.431	130.075	127.633	131.914	141.02	149.145	156.488	164.442	170.487	174.156	175.888	178.491	179.487	178.996	178.677	180.659	183.304	184.63	181.035	176.614	175.647	178.275	178.232	175.276	172.549	171.042	167.937	161.921	156.072	154.936
29.407	30.3488	34.3131	39.1787	41.8808	42.0562	43.6549	44.2947	42.6411	43.3906	46.9155	48.4886	53.1595	66.1013	77.1402	81.6534	84.4085	87.6833	89.6824	90.5375	90.283	87.947	86.1413	88.9321	94.8568	100.139	104.925	110.03	113.91	116.266	117.199	118.88	119.424	118.847	118.469	119.52	121.18	121.971	119.566	116.432	115.49	117.094	116.949	114.687	112.642	111.476	109.116	104.793	100.806	99.9906
34.064	35.818	40.0237	45.598	48.5996	49.0979	51.0064	51.9004	50.171	50.7866	55.1575	57.2415	63.5596	78.3707	91.4244	97.0363	100.521	104.353	107.181	108.31	107.856	105.365	103.52	107.179	114.385	121.068	126.945	133.354	138.446	141.248	142.828	144.967	145.77	145.242	145.216	146.788	148.832	150.074	147.22	143.58	142.794	144.935	144.85	142.409	140.139	138.901	136.153	130.91	126.086	125.271
26.8139	28.0645	31.2855	35.5454	38.0415	37.9049	39.5467	40.389	39.0029	39.0284	42.2057	43.709	48.2963	59.6887	69.7097	73.3895	75.8771	78.9718	80.8559	81.4704	81.0679	79.0485	77.3839	79.8489	85.2782	90.0551	94.2544	98.7002	102.256	104.336	105.307	106.648	107.134	106.644	106.299	107.386	108.747	109.496	107.096	104.363	103.664	105.053	104.865	102.829	100.945	99.8856	98	94.1648	90.574	89.7805
28.1369	29.8179	33.5637	38.1447	40.8363	41.1353	42.617	43.2375	41.7315	42.0019	45.3456	47.2041	52.1341	64.32	75.2173	79.7059	82.4571	85.4112	87.6498	88.2242	87.9913	85.8803	84.2538	86.9816	92.8484	98.0697	102.763	107.835	111.727	114.078	114.947	116.463	117.172	116.763	116.541	117.541	119.09	120.06	117.755	114.774	114.02	115.448	115.16	113.101	111.207	110.034	107.668	103.669	99.6708	98.7583
22.4391	23.3352	25.9946	29.9877	32.1274	32.0958	33.5358	33.8844	32.9938	33.1569	36.077	37.0622	40.7964	50.3262	58.7493	62.2964	64.5436	66.9171	68.5386	68.9746	68.916	67.0274	65.7613	67.8401	72.2621	76.3339	79.9101	83.7019	86.6622	88.4324	89.0886	90.2934	90.9112	90.3602	89.9612	90.7512	91.806	92.3549	90.5352	88.0485	87.3575	88.3916	88.1224	86.4299	84.8976	83.866	81.8226	78.3359	75.4783	74.6415
24.1678	25.3942	28.5576	32.3429	34.2305	34.5894	36.1592	36.9972	35.5883	35.8436	38.5225	40.0794	44.6928	55.0573	64.3119	68.0338	70.3605	72.968	74.9237	75.491	75.0594	73.1463	71.9084	74.0863	79.1602	83.609	87.3452	91.5296	94.911	96.8546	97.6314	98.8708	99.2152	98.7025	98.4903	99.3242	100.69	101.256	99.1661	96.489	95.8743	97.1662	96.6104	94.582	92.7502	91.5341	89.382	85.7367	82.0132	81.262
34.2051	35.995	40.5184	46.4453	49.8699	50.2456	52.5632	53.8386	52.184	52.6885	57.286	60.0047	66.7529	82.7313	96.8359	102.708	106.613	111.122	114.151	115.581	115.55	113.036	111.172	115.392	123.461	130.703	137.367	144.417	149.963	153.483	155.194	157.583	158.738	158.498	158.882	160.504	163.011	164.386	161.628	157.568	156.792	159.278	159.052	156.283	153.759	152.365	149.262	143.682	138.202	137.119
29.2482	30.7348	34.523	39.6526	42.3325	42.2829	44.3036	44.9554	43.327	43.783	47.4438	49.0264	54.2727	67.227	78.6236	83.2062	85.7595	89.2725	91.5604	92.3757	92.1029	89.7881	87.7568	90.7535	96.9271	102.297	107.087	112.225	116.274	118.628	119.852	121.334	121.899	121.378	121.221	122.059	123.72	124.553	121.979	118.698	117.885	119.508	119.058	116.806	114.514	113.29	110.762	106.354	102.343	101.414
20.1106	21.5175	23.8362	27.1156	29.1209	29.418	30.3789	30.9772	29.6538	29.8664	32.3032	33.4326	36.7096	45.3957	52.8709	56.0459	57.8011	60.0304	61.0488	61.5392	61.3186	59.4736	58.2622	60.0222	63.958	67.3482	70.5542	73.8017	76.3025	77.5164	78.1748	79.1262	79.2918	78.9357	78.5757	78.9175	79.873	80.3345	78.699	76.4619	75.8222	76.5916	76.1597	74.6585	73.0717	72.0137	70.161	67.1012	64.4029	63.6432
30.5712	32.3756	36.2317	41.5051	44.6615	45.1308	47.3595	48.3031	47.3529	47.7527	51.5799	53.8957	60.088	74.6657	87.6748	92.9307	96.38	100.762	103.69	104.758	104.813	102.495	101.063	104.624	111.998	118.767	124.659	131.058	136.176	139.177	140.96	143.139	144.174	143.905	144.12	145.742	147.939	149.33	146.653	143.208	142.623	144.754	144.651	142.073	139.575	138.184	135.259	129.956	124.998	123.947
29.9362	32.1182	36.0218	41.1892	44.3368	44.5782	46.9703	48.0975	46.6521	47.4509	51.1422	52.9845	59.6047	73.5684	86.1777	91.2858	94.6662	98.3371	101.326	102.31	102.098	99.5349	97.7555	101.134	108.174	114.345	119.948	125.707	130.494	133.292	134.485	136.246	137.08	136.38	136.223	137.737	139.555	140.469	137.613	134.099	133.268	134.885	134.262	131.542	128.749	127.142	123.788	118.446	113.552	112.29
23.3035	24.4452	27.8681	31.6536	34.174	34.5186	35.943	36.7036	35.5287	36.0247	38.7942	40.5125	45.0444	55.6416	64.7789	68.9023	71.2737	73.9687	75.686	76.3688	76.2534	74.3646	73.1413	75.4725	80.6743	85.1328	89.2806	93.6093	97.0798	99.0494	99.8912	101.159	101.706	101.274	101.051	101.976	103.288	103.871	101.921	98.9755	98.1917	99.5193	98.9096	96.8312	94.9718	93.584	91.1684	87.0956	83.4873	82.5784
28.5779	30.1396	34.0134	39.0494	41.8808	42.0562	44.0153	45.0728	43.655	44.2358	47.942	49.8927	55.5178	69.1793	81.0409	85.9827	89.2997	92.71	95.3716	96.4962	96.2723	94.1561	92.5011	95.7424	102.458	108.28	113.872	119.425	123.814	126.635	128.083	129.775	130.804	130.24	129.982	131.532	133.367	134.43	131.803	128.373	127.667	129.368	128.86	126.544	124.118	122.494	119.735	114.766	110.218	109.106
31.7884	33.196	37.6406	43.4869	46.7364	47.1143	49.5217	50.5496	49.3807	50.4697	54.6443	56.868	63.2813	78.4562	91.9738	97.7996	101.722	106.036	109.136	110.417	110.591	108.09	106.555	110.314	118	125.109	131.634	137.947	143.334	146.432	147.962	150.327	151.499	151.17	151.065	152.693	155.053	156.328	153.372	149.644	148.523	150.805	150.469	147.597	144.822	142.95	139.634	133.846	128.585	127.33
20.7456	21.807	24.6007	28.006	30.1654	30.6506	31.6907	32.6657	31.3536	31.3154	34.2052	35.7328	39.4049	48.9297	56.8265	60.2041	62.5547	65.0689	66.5391	67.1364	66.8457	65.1051	63.8738	66.0105	70.3077	74.1678	77.7775	81.3911	84.1898	85.9532	86.5917	87.7489	88.1124	87.4903	87.1289	87.9854	88.9703	89.4346	87.4885	85.2238	84.4929	85.2714	84.7255	82.9054	81.0012	79.8674	77.7534	74.0167	70.9299	70.034
24.1149	25.6677	29.0672	33.4918	36.2631	36.4313	37.9611	39.4199	38.1977	38.7718	42.0246	43.6343	48.4135	60.1304	70.5338	74.8239	77.3783	80.4669	82.7008	83.5358	83.5811	81.6838	80.1642	83.0163	88.6771	93.618	98.3298	103.199	106.854	109.09	110.249	111.843	112.485	112.022	111.9	113.113	114.476	115.502	113.106	109.979	109.376	110.863	110.233	108.008	105.525	103.825	101.126	96.478	92.253	91.3572
24.9616	26.5524	30.1464	34.6263	37.2935	37.6215	39.2872	40.4477	39.3309	40.1001	43.1567	45.3072	50.2005	62.4675	73.0472	77.3767	80.1303	83.4571	85.8602	86.954	86.7587	84.7612	83.1825	86.1837	92.4158	97.5469	102.412	107.25	111.199	113.626	114.769	116.335	116.918	116.488	116.301	117.671	119.303	120.292	117.663	114.782	113.866	115.276	114.926	112.532	110.122	108.397	105.535	100.741	96.2969	95.2835
26.3023	27.8554	31.5253	36.3065	39.453	39.7751	41.6513	42.7676	41.7315	42.5	45.8588	48.175	53.5696	66.4005	78.0467	83.0746	86.5101	90.179	92.9192	94.0074	94.1154	91.9901	90.4605	93.663	100.218	106.241	111.557	117.136	121.515	124.192	125.535	127.48	128.445	128.203	128.158	129.65	131.465	132.602	129.967	126.75	126.017	127.601	127.019	124.657	121.982	120.131	117.105	111.862	107.246	106.022
18.6817	19.8284	22.6821	25.6221	27.5541	27.8736	29.0528	29.8172	28.8934	29.1117	31.7296	33.104	36.9293	45.7662	53.5713	56.6249	58.8394	61.3489	62.8605	63.5013	63.2252	61.7028	60.7619	62.8109	67.0479	70.7169	74.133	77.6361	80.6329	82.176	82.9463	84.0718	84.504	84.1722	84.1525	84.7573	85.9297	86.5805	84.7005	82.4244	81.8849	82.8493	82.3226	80.6476	78.8906	77.6404	75.3053	71.9785	68.5178	67.5925
20.7456	22.0805	25.0203	28.7814	30.9135	31.2457	32.7574	33.7082	32.6807	33.0361	35.6996	37.4804	41.69	51.851	60.7683	64.3361	67.0205	69.6836	71.455	72.2999	72.0744	70.2673	69.0432	71.5878	76.5647	80.9649	84.8619	88.9589	92.2144	94.2951	95.3346	96.4924	97.1103	96.7211	96.5701	97.4425	98.797	99.3619	97.3214	94.8398	94.0701	95.2182	94.752	92.6173	90.5884	89.2311	86.694	82.7117	79.0256	78.0091
24.6088	26.1181	29.8016	34.296	37.0112	37.5506	39.5467	40.7854	39.8379	40.3869	43.9568	46.1735	51.2699	64.0492	74.9152	79.4822	82.7573	86.6826	88.887	90.2483	90.2349	88.299	87.0426	90.3102	96.7803	102.424	107.7	113.02	117.423	120.108	121.519	123.38	124.312	124.099	124.23	125.457	127.449	128.416	126.019	122.944	122.203	123.852	123.215	120.719	118.025	116.47	113.135	108.02	103.171	102.18
20.0753	21.2762	24.4807	28.1496	30.2501	30.5939	32.2384	33.0622	32.2632	32.8248	35.5034	36.9726	41.2066	51.3523	60.2876	63.7834	66.0573	68.7418	70.7259	71.5151	71.4773	69.6807	68.5585	71.1042	75.9004	80.3823	84.2704	88.3884	91.8529	93.7263	94.6233	96.0393	96.6631	96.1864	96.146	97.0857	98.2151	98.9814	96.9875	94.3747	93.6853	94.8735	94.147	91.9193	89.9304	88.3116	85.6436	81.5389	77.8747	76.7539
26.3552	28.1932	32.3347	37.441	40.3282	41.4895	43.8423	45.0728	44.326	45.3226	49.3609	51.8046	58.0227	72.2859	85.024	90.6147	94.2909	98.6432	101.79	103.508	103.513	101.529	100.306	104.221	112.067	118.879	125.149	131.549	136.928	140.125	142.079	144.521	145.855	145.714	146.097	147.843	150.307	151.762	148.932	145.415	144.675	146.711	146.207	143.314	140.276	138.117	134.341	128.12	122.547	121.237
20.9573	22.8205	25.7548	29.8729	32.4238	32.9317	34.5592	35.5289	34.5744	35.3455	38.13	39.5118	44.2534	54.9148	64.4905	68.3496	70.7858	73.6155	75.8627	76.7716	76.7734	74.9873	73.6939	76.2624	81.4622	86.2457	90.4857	94.8658	98.3522	100.53	101.61	103.099	103.618	103.184	103.195	104.215	105.542	106.195	104.149	101.31	100.603	101.872	101.053	98.9252	96.4928	94.765	91.9045	87.5728	83.5661	82.211
21.5218	22.8365	26.1744	30.0596	32.4802	32.9884	34.7898	35.6464	34.6787	35.2398	38.296	40.1092	44.7661	55.7556	65.3146	69.3365	71.8366	74.8751	77.1663	78.0624	77.9385	76.3411	75.2243	77.9065	83.4552	88.4343	92.6914	97.2127	101.172	103.352	104.418	105.938	106.756	106.487	106.443	107.711	109.312	110.075	108.031	105.42	104.605	105.872	105.531	103.01	100.902	99.3204	96.4038	91.7868	87.7913	86.6961
19.5108	21.0188	24.136	27.5751	29.629	30.2256	31.6763	32.4895	31.8308	32.6739	35.126	36.629	41.1333	51.2383	59.9717	63.7045	66.0948	68.6947	70.8916	71.8972	71.7662	70.1229	69.0347	71.5797	76.4952	80.95	84.8839	88.9878	92.2939	94.3899	95.4827	96.9076	97.4495	97.1771	97.1062	98.0914	99.3953	100.197	98.1227	95.508	94.8739	96.0629	95.504	93.2377	90.7934	89.2565	86.4707	82.194	78.5684	77.3892
19.6343	21.051	23.8962	27.5751	30.0242	30.6506	32.1375	33.1796	32.1886	32.7342	36.0619	37.57	41.9097	52.136	61.1804	64.9546	67.5834	70.4841	72.2946	73.312	73.3358	71.7203	70.6756	73.1594	78.2951	82.7501	86.885	91.4357	94.7881	96.7817	97.8315	99.354	99.9554	99.7089	99.7465	100.492	101.87	102.564	100.618	98.0621	97.1655	98.1833	97.5353	95.4352	92.998	91.1714	88.3564	83.9249	79.8454	79.05
24.4854	26.8098	30.5061	35.4592	38.2956	39.265	41.4062	42.6795	42.0596	42.8623	46.7645	49.0712	54.6389	68.5096	80.7799	85.8775	89.3998	93.6989	96.5094	98.0143	98.1307	96.1596	94.8987	98.6358	105.865	112.179	118.122	124.198	129.171	132.177	133.996	136.178	137.127	137.002	137.199	138.759	140.981	142.256	139.474	136.095	135.337	137.109	136.388	133.49	130.586	128.34	124.301	118.349	113.064	111.662
19.6343	20.9706	24.0311	27.6038	30.1795	30.849	32.1952	33.209	32.5167	33.1569	36.3638	37.8837	42.3345	52.8628	61.7298	65.8757	68.7343	71.4023	73.565	74.7165	74.5394	73.2094	72.07	74.7391	80.1413	84.9311	89.2514	93.7898	97.4051	99.5453	100.654	102.268	102.939	102.728	102.867	103.842	105.247	105.988	104.149	101.487	100.825	102.14	101.39	99.2182	96.8516	94.8916	91.9045	87.3544	83.0695	82.2187
16.7766	18.3968	21.0034	24.0854	26.2555	26.3859	27.3518	28.4811	27.6707	28.0702	30.6427	32.0585	35.6549	44.4266	52.2253	55.4274	57.2632	59.6183	61.5128	62.1175	61.9349	60.7191	59.4781	61.5375	66.0205	69.6637	73.0813	76.5963	79.1147	80.6957	81.5016	82.69	83.0776	82.6468	82.4883	83.1757	84.0938	84.8018	82.7306	80.4031	79.7642	80.5652	79.8505	78.0969	75.9683	74.2323	71.9226	68.0718	64.7813	63.6891
23.0741	24.6704	28.5126	32.9174	35.7549	36.7997	39.0566	40.5799	39.8826	40.6435	44.6663	46.9203	52.5589	65.916	77.6621	82.693	86.2849	90.3203	93.2506	94.9162	95.0494	93.3439	92.161	95.7424	102.852	109.162	114.829	120.811	125.621	128.589	130.306	132.463	133.688	133.487	133.727	135.377	137.473	138.666	136.286	132.966	132.037	133.937	133.173	130.284	127.279	124.931	120.926	114.919	109.438	108.28
17.9761	19.185	22.0526	25.8375	27.8223	28.412	30.0186	30.9331	30.3546	30.9532	33.5712	35.3296	39.0973	48.9297	57.7192	61.2306	63.9557	66.5757	68.4834	69.5839	69.513	68.1555	67.1046	69.4762	74.3246	78.8884	82.7439	86.8648	90.1323	91.9471	92.9191	94.5141	95.0825	94.6296	94.4338	95.5122	96.8792	97.4427	95.5935	92.9031	92.0264	93.1065	92.5825	90.4112	88.042	86.1774	83.0218	78.8859	75.0605	73.8991
17.3587	18.5094	21.543	25.1338	27.3141	27.7744	29.0095	30.1403	29.4749	30.1532	33.0127	34.5529	38.4527	48.3455	56.6891	60.2305	62.7673	65.4338	67.5665	68.3137	68.6079	67.1808	66.1014	68.5412	73.6139	77.9846	82.0866	86.2004	89.3009	91.4731	92.4672	93.8723	94.643	94.3229	94.3378	95.3824	96.9284	97.6081	95.7605	93.2583	92.5052	93.5288	92.9455	90.8679	88.5462	86.692	83.6918	79.3955	75.5493	74.542
17.6762	18.992	21.8728	25.2918	27.4976	28.1853	29.8744	30.9772	30.0117	30.8324	33.5108	35.2847	39.3023	49.0295	57.7192	61.4674	63.8556	66.6934	68.7043	69.6769	69.6671	68.1104	67.3257	69.8227	74.7803	79.2544	83.1894	87.3991	90.7179	92.8149	93.7045	95.2465	95.892	95.6675	95.626	96.5666	98.084	98.7746	96.8706	94.4931	93.6254	94.9252	94.3199	91.9796	89.6484	87.7802	84.767	80.3499	76.4795	75.338
20.1988	21.8231	25.0953	29.083	31.8451	32.2517	34.0979	35.0444	34.5147	35.3455	38.4621	40.6918	45.5571	56.4111	66.3996	70.9288	73.8882	77.2766	79.7512	80.8507	81.0583	79.608	78.3872	81.356	87.1012	92.3258	97.0954	101.935	106.023	108.361	109.501	111.473	112.192	112.014	112.14	113.21	114.902	115.932	113.64	110.714	110.06	111.302	110.509	108.094	105.431	103.268	99.8774	94.5692	90.2508	89.0611
20.728	22.5952	26.1295	30.5047	33.4401	34.3486	36.2746	37.6873	37.0495	37.9568	41.6623	43.9181	49.307	61.6124	72.6077	77.2714	80.7558	84.5048	87.3294	88.9265	89.3105	87.6582	86.6515	89.9153	96.7494	102.634	107.963	113.605	117.944	120.794	122.489	124.588	125.569	125.483	125.686	127.047	128.957	130.079	127.722	124.534	123.699	125.309	124.443	121.52	118.632	116.023	112.184	106.233	100.979	99.6155
18.2231	19.7963	23.2667	27.0294	29.4032	30.1406	32.0078	33.3118	32.8745	33.655	36.9224	38.8396	43.3599	54.3163	64.1196	68.0864	71.061	74.5337	77.0337	78.4445	78.757	77.2165	76.3211	79.3089	85.1314	90.2493	95.0358	99.9784	104.027	106.429	107.782	109.683	110.495	110.559	110.588	111.872	113.59	114.625	112.488	109.792	108.957	110.216	109.472	106.931	104.251	102.02	98.4383	93.1133	88.4693	87.3084
17.1294	18.4772	21.4831	24.5306	27.2294	27.6894	29.4852	30.7716	30.0117	30.7117	33.6014	35.4042	39.4928	49.457	57.9252	62.1648	64.4436	67.3762	69.4003	70.4411	70.7263	69.437	68.482	71.0155	76.2017	80.6586	84.8619	89.32	92.7349	94.7472	95.9717	97.4739	98.2205	98.0892	98.0583	99.0809	100.51	101.414	99.2329	96.6751	96.0454	97.0973	96.282	94.0995	91.6223	89.4927	86.388	81.4984	77.2993	76.2794
20.9749	22.5148	26.0545	30.3611	33.2001	33.8243	35.9863	37.4524	36.9601	38.0322	41.3755	43.694	49.2924	61.5982	72.4704	77.4688	80.8559	84.7755	87.3184	88.9781	89.4838	87.6763	86.677	90.1974	96.8653	103.022	108.416	114.031	118.616	121.501	123.156	125.441	126.571	126.34	126.686	128.069	130.244	131.535	128.982	125.904	124.999	126.722	125.973	123.175	119.939	117.643	113.532	107.527	102.406	100.886
18.3642	19.9089	23.3266	26.9576	29.7984	30.2681	32.0078	33.3558	32.964	33.7757	36.8922	38.989	43.5796	54.6441	64.2982	68.7049	71.4738	74.7927	77.4756	78.5581	79.1517	77.767	76.6272	79.5587	85.5331	90.6153	95.3426	100.354	104.28	106.728	108.19	110.015	110.935	110.78	110.796	112.204	113.877	114.816	112.839	109.843	109.077	110.423	109.852	107.301	104.456	101.952	98.4466	93.2751	88.5166	87.2854
17.6939	19.4745	22.4123	26.2108	28.8103	29.5596	31.4889	32.7098	32.3378	33.2625	36.6506	38.7799	43.3159	54.0313	63.7763	68.297	71.2612	74.6868	77.2325	78.6614	79.2384	77.8211	76.8908	80.1229	86.0198	91.4668	96.4089	101.61	105.625	108.208	109.775	111.873	113.055	112.785	113.084	114.435	116.27	117.554	115.451	112.71	111.984	113.336	112.636	110.318	107.379	105.074	101.267	95.7258	91.1021	89.8188
20.3046	21.9679	25.3051	29.6431	32.2544	33.0593	35.179	36.7917	36.468	37.4436	41.0132	43.47	48.8676	61.1992	72.1407	76.7451	80.2929	84.3047	87.0091	88.6993	89.3779	87.7033	86.5239	90.3425	97.012	103.186	108.569	114.385	119.043	121.837	123.675	125.811	127.057	127.047	127.182	128.856	131.031	132.263	129.867	126.8	125.931	127.601	126.82	123.692	120.58	118.149	113.797	107.608	102.453	101.07
18.7346	20.5684	23.8962	28.049	30.9699	31.8124	33.7664	35.4555	34.8726	35.8285	39.5489	41.3639	46.5239	58.3349	68.9268	73.8369	77.2156	80.926	83.7392	85.5599	86.0077	84.5176	83.5566	87.0783	93.6132	99.4068	104.786	110.348	114.64	117.542	119.363	121.636	122.778	122.699	122.757	124.541	126.646	127.928	125.551	122.462	121.707	123.421	122.576	119.917	116.607	114.032	110.001	103.927	98.7879	97.4495
14.7303	16.0804	18.6503	21.9457	23.9265	24.8557	26.2131	27.2477	26.776	27.5117	30.1295	32.1182	35.8747	45.0822	53.0357	56.4933	59.1271	61.8904	63.932	65.102	65.3725	64.2207	63.1766	65.7284	70.7094	74.9819	78.8292	83.052	86.2429	88.2137	89.5331	91.1239	91.6437	91.516	91.7375	92.6247	94.1418	94.845	92.9809	90.8564	90.1281	91.1843	90.4907	88.1017	85.7008	83.6973	80.4414	75.8528	72.0335	70.9448
15.8593	17.2225	20.4339	23.511	25.945	26.5134	28.26	29.6117	29.3854	29.9871	33.0881	34.986	39.0973	48.8157	57.6231	61.4674	64.0683	67.388	69.6875	70.8025	71.1307	69.8793	68.8901	71.8537	77.0977	81.8239	86.0816	90.6053	94.1952	96.4754	97.6907	99.505	100.31	100.039	100.323	101.522	103.067	104.044	101.929	99.4745	98.7817	99.9072	99.1516	96.5899	93.9464	91.686	88.2158	83.2051	78.9389	77.5729
16.3532	17.8016	20.7037	24.1572	26.8342	27.6327	29.5429	30.845	30.4441	31.4814	34.7335	36.3303	41.3824	51.5233	61.098	65.1256	68.309	71.52	74.272	75.7285	76.0897	75.1137	74.2891	77.3907	83.0689	88.3372	93.1953	98.2597	102.177	104.737	106.122	108.135	109.285	109.317	109.516	111.061	112.722	113.881	111.937	109.209	108.607	109.811	109.204	106.646	103.704	101.286	97.2722	91.7464	87.1055	85.793
16.7589	18.3646	20.9884	24.8753	27.5682	28.3695	30.3789	31.7407	31.2344	32.1909	35.6091	37.7045	42.437	53.1763	62.7462	67.2442	70.0978	73.7803	76.3377	77.5254	78.2466	77.1172	76.1851	79.5265	85.3323	90.8245	95.8757	100.997	104.953	107.603	109.079	111.095	112.253	112.1	112.252	113.834	115.705	116.809	114.7	112.034	111.215	112.552	111.849	109.128	106.251	103.538	99.5632	93.6309	88.8555	87.5992
14.8008	15.8069	18.4704	21.5723	23.5595	24.459	26.3716	27.3211	26.9699	27.6325	30.1596	32.2377	36.0944	45.3672	53.228	57.0065	59.5774	62.2789	64.5617	65.7733	65.9791	64.6629	64.1288	66.6795	71.5205	76.1023	80.0781	84.2363	87.5948	89.5189	90.6519	92.1206	92.993	92.8919	92.9856	94.0117	95.5761	96.2431	94.4917	92.1842	91.5133	92.5462	91.6144	89.222	86.6236	84.6083	81.0121	76.2329	72.1833	70.9907
15.1184	16.756	19.5496	22.6924	25.2251	26.0317	27.6545	29.1859	28.6995	29.5645	32.8466	34.4184	38.6578	48.545	57.1149	61.0726	64.0683	67.2232	69.5991	70.7612	71.2462	70.0507	69.4003	72.2567	77.7466	82.5633	86.8485	91.6018	95.2507	97.5036	98.8613	100.592	101.428	101.431	101.787	102.917	104.559	105.509	103.757	101.141	100.338	101.622	100.552	98.029	95.2538	92.7826	89.1918	84.0301	79.4828	78.4301
12.8781	13.7479	16.1172	19.0735	20.9059	21.7387	22.9698	23.9147	23.6895	24.2363	26.6726	28.4588	31.8025	39.9948	47.2533	50.1901	52.6472	55.1567	57.094	58.0693	58.2277	57.1542	56.6638	58.7488	63.1933	67.0943	70.5688	74.0039	77.0977	78.9602	79.8938	81.2328	81.9904	81.8763	82.0242	82.8837	84.2823	84.8515	83.3066	81.2826	80.4825	81.3064	80.5938	78.3037	75.9427	74.0045	70.9632	66.6887	63.0629	61.99
14.9067	16.2091	19.1748	22.7786	25.0416	25.6492	27.496	28.9656	28.4908	29.7758	32.756	34.7172	39.2437	49.1577	58.3098	62.4543	65.4944	68.8124	71.212	72.8473	73.4802	72.2257	71.5428	74.6343	80.3962	85.5212	90.2009	95.0969	98.8148	101.492	103.018	104.904	106.085	106.03	106.347	107.686	109.55	110.621	108.64	106.02	105.186	106.458	105.66	103.139	100.039	97.4054	93.3767	87.6294	82.9986	81.7824
13.5484	15.1474	17.9308	20.8686	23.122	23.8923	25.3626	26.9394	26.6717	27.6325	30.4012	32.4319	36.2555	45.7234	54.3405	58.1119	60.8784	64.0565	66.3624	67.5702	68.2516	67.2169	66.3904	69.2102	74.5254	79.2992	83.5765	88.0851	91.571	93.7118	95.4235	97.1417	98.0047	98.0892	98.3303	99.5189	101.166	102.183	100.318	97.7322	97.1313	98.1661	97.2933	94.7372	92.152	89.518	85.8091	80.5198	76.1405	74.9247
12.4547	13.4744	15.9074	18.7863	20.6942	21.3278	22.8544	23.7825	23.615	24.4628	26.9745	28.5633	32.0076	40.5933	47.995	51.5455	53.7606	56.6164	58.4749	59.6287	60.0765	59.0495	58.3983	60.7637	65.4952	69.6712	73.4391	77.239	80.1919	82.0885	83.3909	84.8721	85.6143	85.6504	85.7527	86.6796	88.1507	88.9299	87.2464	85.0208	84.2193	85.0904	84.3279	82.1902	79.6767	77.1848	73.9489	69.4064	65.4908	64.4162
13.4955	14.8578	17.691	20.4809	22.6844	23.7931	25.4059	26.5723	26.2542	27.1646	30.22	31.9091	36.0797	45.0822	53.2692	57.2434	59.9402	62.8204	65.3792	66.4342	66.788	66.0076	65.2511	68.0254	73.1427	77.7829	81.9332	86.4604	89.8865	92.093	93.3785	95.0351	96.0308	96.1078	96.3621	97.5966	99.0429	99.9741	98.2646	95.7109	95.0534	96.1664	95.1151	92.6776	89.8791	87.3584	83.5512	78.4653	74.0988	72.9654
15.9651	17.8016	20.8535	24.6024	27.0318	27.9444	30.1483	31.4471	30.9361	32.206	36.0619	37.9435	43.2573	54.1881	64.3394	69.1128	72.5496	76.4173	79.2099	80.8714	81.7612	80.7632	79.9771	83.5402	89.8358	95.6497	101.2	106.737	111.004	113.976	115.688	117.913	119.362	119.586	119.869	121.605	123.663	125.024	122.922	120.17	119.407	120.697	119.827	117.005	113.522	110.574	105.981	99.6487	94.2474	92.9645
12.5429	13.6353	16.1472	19.2171	20.92	21.7528	23.5319	24.5754	24.3158	25.5495	28.152	29.8478	34.029	42.4031	50.1514	54.2431	56.5377	59.6183	61.7337	63.0573	63.5526	62.4608	62.1393	64.8419	69.767	74.2126	78.223	82.4238	85.9176	88.046	89.2071	91.0786	92.0138	91.9327	92.2175	93.452	95.0761	95.9949	94.2079	91.9812	91.2824	92.3911	91.7527	88.9807	86.2904	84.1275	80.1271	75.1572	71.1191	69.9039
13.4602	15.4208	18.1107	21.2707	23.489	24.459	26.314	27.6588	27.5216	28.6589	31.5786	33.343	37.9108	47.9465	57.0325	61.0726	63.9307	67.4233	70.1073	71.4015	72.1706	71.2781	70.6246	73.6752	79.531	84.6548	89.3902	94.1726	97.9762	100.522	102.195	104.088	105.252	105.197	105.507	107.094	108.82	110.05	108.156	105.403	104.75	106.027	105.098	102.407	99.2783	96.2666	92.1775	86.4404	81.7137	80.4201
12.49	13.7157	16.0872	19.0304	20.8918	21.6537	23.2436	24.3258	24.3307	25.2476	27.7746	29.7134	33.487	42.4174	49.6432	53.3746	56.1123	58.8296	61.1924	62.7268	62.9363	61.9464	61.6376	64.1165	68.9173	73.4582	77.4853	81.615	84.8476	87.0324	88.2588	89.9989	90.8804	90.9027	90.9454	92.1868	93.6992	94.4644	92.9224	90.7042	89.9741	90.8913	90.0586	87.464	85.0257	82.3813	78.5557	73.4587	69.2588	68.044
11.6785	12.5897	14.8582	17.6374	19.4944	20.421	21.9751	22.9309	22.9142	23.7835	26.567	28.0256	31.5535	39.6101	46.91	50.2691	53.0851	55.4157	57.5801	58.8851	59.1617	58.3094	57.9561	60.2318	64.7691	68.9766	72.8183	76.6541	79.6425	81.6947	82.9167	84.4493	85.4523	85.4224	85.4326	86.6552	88.1261	88.7149	87.213	84.877	84.2621	85.0473	84.2933	82.0867	79.4973	77.1342	73.3038	68.7674	64.8129	63.7273
11.6609	12.9275	15.2928	18.1975	20.1296	20.8744	22.7391	23.9587	23.7492	24.6137	27.0802	28.9218	32.6521	41.1918	48.5444	52.0587	54.8489	57.6759	59.8336	60.9815	61.7327	60.8003	60.3963	62.9076	67.6427	72.1959	75.9589	80.178	83.3295	85.45	86.7695	88.3454	89.3692	89.5267	89.6892	90.6782	92.2158	92.934	91.3448	89.2833	88.4521	89.4604	88.6842	86.1283	83.3253	80.8966	77.3068	72.3344	68.234	66.9189
12.2607	13.9892	16.387	19.5043	21.8516	22.4613	24.1085	25.6326	25.6428	26.5608	29.5105	31.2668	35.5671	44.9112	53.5713	57.6513	60.278	63.5032	66.285	67.6838	68.396	67.5779	66.8241	70.0242	75.6069	80.6586	85.176	89.8688	93.494	96.0306	97.5944	99.6107	100.711	100.794	101.179	102.593	104.395	105.476	103.665	101.225	100.612	101.648	100.682	98.1841	95.0402	92.0318	88.0752	82.2992	77.6698	76.2718
10.3908	11.5119	13.6291	16.5604	18.1817	18.9475	20.1589	21.1102	21.0652	22.1836	24.5593	26.1884	29.2977	37.0878	44.1218	47.282	49.8576	52.3784	54.1113	55.1777	55.7434	54.9341	54.5042	56.8065	61.0381	65.2942	68.6626	72.4153	75.1458	76.9768	78.2637	79.7227	80.5409	80.6104	80.728	81.6671	83.2251	83.776	82.3383	80.3016	79.482	80.2721	79.7208	77.3644	74.7379	72.3342	68.7384	64.1571	60.5482	59.3571
9.01484	10.0642	11.6806	13.9898	15.6834	16.2413	17.4489	18.3352	18.1427	19.0138	21.3289	22.5289	25.1229	31.6584	37.584	40.2945	42.2144	44.3851	45.8814	46.6373	47.2312	46.4508	45.9849	47.9409	51.4363	54.6279	57.5977	60.6159	62.8702	64.2671	65.142	66.3507	66.9477	66.8586	66.9662	67.7004	68.8087	69.4227	68.0146	66.1862	65.4071	65.869	65.165	63.1197	61.0322	58.896	56.0016	52.0003	49.0314	48.0526
10.02	10.9196	12.9298	15.3385	17.0306	17.7623	19.2184	20.1284	19.9935	21.0085	23.1709	24.6999	27.8395	35.0029	41.475	44.3796	46.6951	49.0744	50.8286	52.0588	52.4837	51.6627	51.2371	53.4605	57.5323	61.1875	64.6375	68.0059	70.7305	72.3593	73.4884	74.8768	75.6413	75.6284	75.7726	76.7075	77.9239	78.6068	77.1285	75.1601	74.5137	75.2	74.4607	72.2213	69.8132	67.4935	64.0526	59.595	56.1771	55.0161
11.149	12.3432	14.5336	17.148	19.1972	20.0434	21.7121	22.8595	22.8116	23.8462	26.4844	28.2697	32.1826	40.4323	47.8891	51.3934	54.0319	57.0913	59.3182	60.6509	61.4147	60.5702	60.0881	62.8258	67.7483	72.16	76.2174	80.3794	83.6929	85.8092	87.2436	88.9736	89.994	90.0957	90.5105	91.7043	93.2499	94.1472	92.554	90.3073	89.7559	90.6072	89.6864	87.1855	84.3307	81.5855	77.6247	72.3463	68.1157	66.8219
9.39377	10.5577	12.3753	14.6779	16.3389	17.1601	18.3463	19.3576	19.4194	20.2387	22.3709	24.0277	27.1217	34.1408	40.4861	43.3269	45.5818	47.956	49.7681	50.897	51.3715	50.706	50.2466	52.4249	56.4547	60.0858	63.3484	66.7856	69.4076	71.0249	72.1214	73.4988	74.3576	74.2838	74.5005	75.3814	76.588	77.3121	75.8931	73.9634	73.2824	73.8726	73.0302	70.8511	68.3735	66.0509	62.6094	58.1917	54.6518	53.4662
9.87006	10.8794	12.8399	15.3457	17.1011	17.7906	19.2472	20.2606	20.1799	21.1293	23.5634	25.133	28.5133	35.9292	42.5807	45.7416	48.0211	50.5165	52.6459	53.7369	54.3517	53.6526	53.2777	55.685	59.8922	63.813	67.4859	71.1002	73.9296	75.874	76.9633	78.5161	79.4039	79.4378	79.6691	80.7142	82.0545	82.7928	81.3062	79.3127	78.6268	79.3373	78.4454	76.0302	73.4875	70.9564	67.2864	62.5715	58.8336	57.6605
10.3728	11.5228	13.7842	16.4156	18.2515	19.1508	20.6887	21.8904	21.9244	22.8802	25.4654	27.2018	31.0401	39.1854	46.289	49.663	52.3619	55.2018	57.4789	58.854	59.5129	58.8374	58.5024	61.1252	65.9291	70.2404	74.1943	78.3213	81.5385	83.6727	85.0431	86.8066	87.9084	88.0553	88.3383	89.5833	91.0986	92.0294	90.4589	88.2522	87.5626	88.4868	87.4909	84.9062	82.1518	79.4133	75.3668	70.126	65.9716	64.6827
10.6992	11.8606	14.0914	16.8033	18.6044	19.4483	21.1211	22.3309	22.2525	23.3858	25.9938	27.6125	31.5455	39.8979	47.1818	50.7749	53.5941	56.5968	58.9592	60.4288	61.0632	60.4258	60.003	62.7251	67.671	72.0704	76.1845	80.4335	83.7615	86.0353	87.4399	89.2492	90.4103	90.5675	90.9066	92.2031	93.8318	94.7305	93.1216	90.9501	90.2647	91.2063	90.2698	87.7672	84.7836	81.9693	77.8356	72.504	68.1945	66.8717
9.32321	10.4129	12.3603	14.5056	16.1837	16.9051	18.231	19.2621	19.1659	19.9444	22.3709	23.8634	27.0338	34.1479	40.3625	43.2874	45.6381	48.0384	49.9228	51.0984	51.4967	50.8008	50.4507	52.6143	56.6981	60.3547	63.7465	67.1647	69.8052	71.6119	72.7512	74.0764	74.9088	74.9404	75.1405	76.0302	77.2846	77.9201	76.5734	74.6527	73.9579	74.6785	73.8124	71.5664	69.0143	66.6499	63.1676	58.7013	55.042	53.9829
9.85242	11.0242	13.1472	15.6545	17.4822	18.3999	19.8887	21.0094	21.1043	22.0877	24.7107	26.3877	30.1099	38.0169	45.1079	48.6234	51.1422	53.9245	56.2969	57.6818	58.2997	57.7364	57.3503	60.009	64.6854	69.0005	72.9125	76.9024	80.1505	82.3055	83.639	85.3833	86.4318	86.4867	86.8101	88.0666	89.5701	90.4617	88.8896	86.7045	86.1046	86.9052	85.9308	83.3809	80.4685	77.7303	73.6507	68.4679	64.2373	62.9798
9.85242	11.1448	13.0647	15.7119	17.4822	18.414	19.9824	21.215	21.1714	22.3141	24.839	26.4848	30.3663	38.2662	45.4787	49.1169	51.7114	54.5779	56.8823	58.2395	58.9737	58.3546	58.0475	60.7102	65.4733	69.8856	73.8948	77.9783	81.3108	83.4685	84.8541	86.7424	87.7966	87.9492	88.3823	89.5995	91.1313	92.1411	90.5423	88.3071	87.7251	88.6075	87.586	84.9967	81.9724	79.118	74.9947	69.6488	65.3567	64.036
8.36182	9.44772	11.3111	13.5865	15.2238	15.9416	17.1571	18.1976	18.1669	19.084	21.2387	22.5789	25.7155	32.6089	38.7212	41.682	43.893	46.3491	48.2768	49.4409	49.9946	49.3568	49.018	51.1595	55.2458	58.7749	62.1105	65.5724	68.2039	69.953	71.0804	72.5097	73.3282	73.4504	73.6203	74.5703	75.8667	76.6379	75.2087	73.2445	72.6667	73.3295	72.3992	70.1488	67.6301	65.1104	61.5714	57.0998	53.497	52.3564
8.03547	9.10991	10.794	12.8828	14.4546	15.1695	16.3354	17.3387	17.3617	18.2765	20.3028	21.8993	24.8146	31.2694	37.1485	39.8858	41.829	44.2184	46.0122	47.0037	47.6643	47.078	46.7692	48.8343	52.6387	56.0785	59.2584	62.4348	65.0157	66.6169	67.7462	69.044	69.7854	69.806	70.0439	70.8799	72.1172	72.8324	71.3523	69.6375	68.9812	69.5327	68.6825	66.5122	64.037	61.6432	58.2631	53.917	50.4739	49.3715
7.96491	8.94905	10.779	12.9044	14.3346	15.0632	16.3282	17.2506	17.2574	18.2312	20.2122	21.5856	24.4558	31.1055	36.8739	39.6358	41.6539	43.9535	45.6808	46.9004	47.3899	46.8614	46.4673	48.5442	52.38	55.7424	58.8933	62.1279	64.5747	66.194	67.2276	68.5495	69.3883	69.4247	69.5958	70.5676	71.6377	72.365	71.0476	69.2104	68.6135	69.1793	68.3281	66.1202	63.5884	61.2425	57.924	53.553	50.1941	49.0577
8.353	9.4075	11.1087	13.249	14.871	15.552	16.8904	17.9113	17.988	18.8727	21.0198	22.6386	25.7521	32.4236	38.6044	41.3991	43.5803	46.0607	47.9509	49.193	49.7538	49.1944	48.9075	51.1112	55.1493	58.8235	62.1141	65.5652	68.2075	69.8874	71.073	72.555	73.3783	73.529	73.7124	74.6433	75.8872	76.6296	75.2629	73.3714	72.7351	73.3295	72.4381	70.1617	67.6002	65.0133	61.2654	56.8005	53.0871	52.0962
8.3971	9.42359	11.2586	13.4573	14.8851	15.7433	17.1066	18.0728	18.1222	19.2199	21.3368	22.7805	26.0378	33.0079	39.1401	42.1755	44.4059	46.8612	48.8733	50.236	50.9238	50.318	50.1063	52.441	56.5165	60.2837	63.7903	67.2838	70.0763	71.8598	73.0735	74.6088	75.4408	75.5576	75.8606	76.963	78.2927	79.0866	77.6836	75.7099	75.0695	75.8119	74.9015	72.385	69.7705	67.1645	63.3454	58.6527	54.8725	53.7188
8.18542	9.25469	11.2661	13.3855	15.0121	15.7645	17.2147	18.249	18.4428	19.3104	21.5255	22.9971	26.3966	33.4924	39.7101	42.669	45.0564	47.6499	49.6853	51.0932	51.67	51.1031	50.8545	53.2147	57.4705	61.4004	64.8384	68.4609	71.2583	73.2234	74.4664	75.9905	76.9829	77.0554	77.3288	78.4026	79.8294	80.5013	79.136	77.2153	76.5232	77.2342	76.2672	73.8715	71.1078	68.472	64.6274	59.8215	55.9091	54.7329
7.23284	8.33778	10.0521	11.8848	13.3254	13.9864	15.103	16.0612	16.1614	16.9784	18.8235	20.316	23.2033	29.2886	34.7381	37.4646	39.4272	41.5696	43.2946	44.4374	44.8863	44.3571	44.0782	45.9853	49.6454	52.8965	55.8221	58.8928	61.2962	62.8142	63.8082	65.08	65.7683	65.8472	65.9953	66.8407	67.9209	68.4974	67.2747	65.4722	64.8383	65.3781	64.5119	62.3069	59.9911	57.6236	54.2477	50.1317	46.7729	45.7092
7.47099	8.3056	10.082	12.1504	13.4877	14.0785	15.5138	16.4356	16.4373	17.2501	19.2009	20.6147	23.467	29.766	35.3356	38.0107	40.0839	42.3289	44.0955	45.1758	45.7385	45.1467	44.9497	46.9444	50.584	54.058	57.0418	60.1349	62.6228	64.2106	65.2197	66.575	67.2757	67.3647	67.4715	68.3737	69.597	70.1975	68.9483	67.2313	66.5527	67.0287	66.1585	63.9141	61.5078	59.0998	55.6207	51.3813	48.0066	46.8802
8.0884	8.98122	10.719	12.9834	14.4757	15.2828	16.6958	17.625	17.9134	18.9633	21.1331	22.7133	25.9938	33.0506	39.3461	42.4584	44.8187	47.391	49.4312	50.8299	51.5304	51.0219	50.8885	53.3235	57.5285	61.4938	65.1159	68.7497	71.5728	73.5078	74.8517	76.4964	77.4764	77.6648	77.9689	79.1488	80.5465	81.3203	79.9582	78.0568	77.4083	78.053	77.1316	74.6859	71.8298	69.0836	65.0906	60.0803	56.2126	54.8745
7.0829	7.78281	9.32513	11.2313	12.6196	13.2921	14.721	15.5473	15.5575	16.4124	18.5291	19.7559	22.6101	28.5333	33.9689	36.5303	38.6266	40.7868	42.4772	43.6319	44.1112	43.6757	43.4448	45.5178	49.0352	52.2766	55.2488	58.2754	60.6166	62.2017	63.197	64.4533	65.3018	65.3675	65.5513	66.4109	67.4661	68.1334	66.9534	65.2777	64.6587	65.0592	64.1316	62.0312	59.5468	57.2102	53.7184	49.432	46.1068	45.1275
6.80066	7.54956	8.89796	10.7431	12.0197	12.7962	14.0219	14.8719	14.8493	15.7181	17.5706	18.8672	21.5701	27.3007	32.4238	34.8722	36.7564	38.8797	40.4998	41.5717	42.1468	41.627	41.502	43.3216	46.6869	49.8266	52.7108	55.5422	57.8297	59.2448	60.1481	61.3199	62.0751	62.0573	62.2789	63.0124	64.0689	64.663	63.5144	61.9286	61.3195	61.745	60.8254	58.6919	56.4066	54.1438	50.7534	46.7063	43.6001	42.5597
7.00352	7.85519	9.39257	11.4037	12.909	13.5968	14.9444	15.9144	15.9601	16.8501	18.7027	20.1144	23.1081	29.4097	34.8617	37.4843	39.5898	41.8639	43.7199	44.897	45.4737	44.9888	44.7839	46.9202	50.6496	54.0468	57.1587	60.2649	62.7963	64.4695	65.542	66.9072	67.7537	67.8639	68.0836	68.9779	70.1215	70.8304	69.6161	67.891	67.1898	67.7312	66.7938	64.5604	62.0376	59.5385	56.0011	51.6078	48.1879	46.9912
7.53273	8.48255	10.082	12.2294	13.6712	14.3548	15.7444	16.8247	16.8995	17.8312	19.9934	21.2869	24.4411	31.0627	36.9494	39.9056	42.0792	44.6598	46.5921	47.9434	48.5646	48.143	47.9552	50.1843	54.2146	57.83	61.1902	64.5651	67.293	69.0233	70.2506	71.7169	72.6073	72.7113	73.0443	74.112	75.4201	76.125	74.8289	72.8724	72.3161	72.9115	71.8763	69.4508	66.7841	64.0601	60.2357	55.4862	51.8573	50.6841
6.66835	7.48521	8.95791	10.8939	12.1891	12.9521	14.2381	15.0775	15.2742	16.1483	18.0461	19.3153	22.1999	28.0987	33.55	36.0368	38.2325	40.4454	42.1458	43.2963	43.8993	43.5223	43.3045	45.2921	48.9	52.2467	55.2634	58.3007	60.7431	62.3293	63.3896	64.7591	65.5486	65.6781	65.8713	66.7637	67.8841	68.4313	67.2622	65.6033	64.8938	65.3307	64.4125	62.2509	59.7006	57.2988	53.6605	49.3754	45.9649	44.8864
6.28909	7.26805	8.70311	10.5348	11.7374	12.3216	13.5894	14.5562	14.5734	15.537	17.3592	18.7103	21.3137	27.2009	32.3414	34.8196	36.7627	38.9797	40.6268	41.7576	42.3924	42.0016	41.7315	43.7165	47.1967	50.3682	53.2622	56.1813	58.5056	60.0761	61.0742	62.343	63.1198	63.1542	63.383	64.1723	65.3106	65.8708	64.6788	62.9857	62.367	62.8138	61.8497	59.67	57.2012	54.7174	51.3241	47.0864	43.7971	42.7625
5.86572	6.72112	7.96118	9.76653	10.9893	11.6557	12.6669	13.5725	13.6713	14.42	16.2724	17.4333	19.783	25.4054	30.2606	32.6023	34.3859	36.2662	37.9369	38.9486	39.5422	39.1633	38.93	40.7707	43.9987	46.8725	49.5994	52.3613	54.4138	55.865	56.8288	57.9599	58.644	58.7	58.7984	59.5329	60.4915	61.0106	59.8834	58.3342	57.711	58.0386	57.234	55.2535	52.8007	50.4869	47.1929	43.2647	40.2341	39.2227
5.82162	6.68091	7.84127	9.65882	11.0317	11.5636	12.6741	13.5064	13.5073	14.3747	16.1516	17.4482	19.8269	25.2985	30.1919	32.5628	34.4672	36.4899	38.0197	39.0106	39.6818	39.2806	39.1383	41.0326	44.242	47.1675	49.9098	52.6899	54.8584	56.2369	57.2029	58.4809	59.0912	59.2268	59.3945	60.0926	61.1307	61.6889	60.547	59.0615	58.4635	58.7972	57.878	55.8568	53.4971	51.1618	47.8711	43.8228	40.7938	39.7699
6.02448	6.95437	8.47079	10.2333	11.4198	12.1232	13.4957	14.336	14.5436	15.386	17.2762	18.5386	21.4529	27.2437	32.4719	35.1946	37.1505	39.3859	41.1515	42.3978	43.1049	42.6378	42.5053	44.5547	48.1854	51.5371	54.5148	57.6003	60.0383	61.6366	62.7302	64.0947	64.9472	65.0059	65.3313	66.2689	67.38	68.0259	66.8157	65.1466	64.5432	65.0635	64.1316	61.9105	59.3972	56.8137	53.1725	48.8012	45.4762	44.2627
5.68932	6.55222	7.9312	9.68036	10.7917	11.4432	12.6309	13.5578	13.8875	14.6464	16.4384	17.6573	20.325	25.783	30.81	33.1681	35.1115	37.2669	38.9532	40.162	40.7747	40.2914	40.0991	42.1167	45.4779	48.6465	51.5239	54.3002	56.5573	58.1292	59.0812	60.3987	61.1768	61.3654	61.4908	62.2906	63.4256	63.935	62.7757	61.2266	60.6269	61.0037	60.0778	57.8991	55.4325	53.0345	49.5748	45.4081	42.2048	41.0366
5.19539	6.06963	7.2942	9.03412	10.1989	10.8197	11.9101	12.7502	12.8065	13.6653	15.4044	16.6416	19.0066	24.2012	28.7429	31.0693	32.9223	34.8712	36.3351	37.415	37.9774	37.5839	37.4634	39.2595	42.4383	45.3002	47.9598	50.5127	52.5522	53.9582	54.8764	55.9439	56.6818	56.7382	56.8982	57.635	58.5901	59.054	57.9969	56.537	55.8682	56.1941	55.2935	53.3146	51.032	48.6943	45.5346	41.5783	38.6733	37.6613
5.60994	6.52809	7.99116	9.45777	10.7282	11.4715	12.6597	13.5211	13.7533	14.6766	16.2422	17.6274	20.1346	25.6975	30.6383	33.1089	34.9801	37.1256	38.898	39.94	40.6399	40.4087	40.2181	42.0643	45.5166	48.6315	51.4582	54.3544	56.6441	58.1146	59.196	60.5157	61.2732	61.3458	61.6948	62.4569	63.4583	64.1625	63.0052	61.3619	60.8065	61.2278	60.2939	58.0715	55.6675	53.2159	49.7195	45.586	42.3585	41.2624
6.49195	7.46913	8.9729	10.9154	12.3655	13.2142	14.4831	15.4886	15.8259	16.8954	18.8688	20.5699	23.7673	30.1792	36.1116	39.2674	41.485	44.1006	46.2828	47.7214	48.5695	48.3099	48.2911	50.7565	55.0025	58.943	62.4684	66.0309	68.9304	70.9265	72.3325	74.0613	75.1247	75.4121	75.9086	77.0441	78.4894	79.492	78.055	76.2258	75.6211	76.2731	75.217	72.6737	69.7363	66.6794	62.477	57.3788	53.4221	52.0886
6.18325	7.21175	8.838	10.7574	12.2173	13.0159	14.4183	15.3418	15.6545	16.586	18.748	20.3832	23.2986	29.8372	35.6583	38.5502	40.8595	43.4826	45.5979	46.9107	47.8762	47.5293	47.4876	49.9506	54.1026	57.8637	61.3655	64.8936	67.7014	69.5228	70.9174	72.6607	73.6405	73.9261	74.3044	75.4219	76.8461	77.7257	76.3648	74.6231	73.9494	74.4759	73.471	70.8985	67.9462	64.8784	60.7526	55.6762	51.7903	50.5349
5.58348	6.48787	7.9387	9.60138	10.8482	11.5636	12.6597	13.4917	13.6862	14.7445	16.5592	17.8888	20.7425	26.2319	31.5104	34.0301	36.1372	38.3028	40.2015	41.3496	42.1035	41.7985	41.7443	43.781	47.3744	50.637	53.6456	56.7157	59.102	60.7761	61.9078	63.3321	64.1646	64.3611	64.6552	65.5187	66.7162	67.3558	66.2647	64.6138	63.9746	64.4257	63.4617	61.1694	58.5812	55.831	52.1759	47.7052	44.2701	43.1184
5.78634	6.50396	8.20099	9.91013	11.2787	11.9391	13.2291	14.2479	14.3721	15.3709	17.329	18.5834	21.387	27.379	32.7809	35.5302	37.7009	39.9509	41.9414	43.2756	43.9956	43.7479	43.6701	45.7717	49.6416	53.1206	56.3114	59.5572	62.0589	63.846	65.0493	66.5222	67.4838	67.6831	67.9516	68.9941	70.269	70.9917	69.7497	68.0559	67.395	67.8734	66.9321	64.5604	61.8624	59.0155	55.1534	50.4714	46.8281	45.6977
6.01566	6.79351	8.1935	10.025	11.3987	12.0949	13.4165	14.4094	14.7374	15.6728	17.7592	19.0837	21.8777	28.2483	33.6943	36.4053	38.6516	41.0104	43.0129	44.329	45.1463	44.9572	44.8136	47.1297	51.059	54.6668	57.9584	61.2903	63.859	65.7127	66.9535	68.4475	69.4847	69.7195	70.0799	71.1313	72.486	73.184	71.9742	70.2295	69.614	70.1016	69.1319	66.6674	63.9217	61.0232	57.1094	52.2832	48.5978	47.4275
6.04212	6.75329	8.26844	10.025	11.3422	12.017	13.366	14.358	14.5809	15.6049	17.7291	19.0613	21.907	28.1201	33.5844	36.3724	38.5703	41.0516	42.9577	44.3238	45.2185	44.9662	44.8604	47.0894	51.0513	54.6593	57.9292	61.2072	63.812	65.6581	66.946	68.4551	69.4577	69.7156	70.0919	71.111	72.4163	73.246	71.9909	70.2591	69.5798	70.0542	69.1017	66.6803	63.8277	60.9051	56.8778	52.0324	48.381	47.129
5.57466	6.47179	7.92371	9.60856	10.9329	11.6203	12.8759	13.8147	14.0814	15.0011	16.9365	18.3967	21.2625	27.0513	32.4032	35.1946	37.3131	39.5919	41.4608	42.7799	43.5094	43.2696	43.33	45.5218	49.2399	52.7808	55.917	59.1203	61.701	63.4158	64.6047	66.122	67.0829	67.3214	67.6716	68.7224	69.933	70.698	69.5535	67.8445	67.1941	67.7097	66.6253	64.3105	61.4821	58.7118	54.7109	50.0508	46.5167	45.2615
5.24831	6.06963	7.39162	8.87615	10.1565	10.8622	12.1119	12.9191	13.2464	14.1936	15.9554	17.3885	20.0686	25.5764	30.8168	33.3655	35.4117	37.6671	39.6105	40.7197	41.6172	41.3698	41.3659	43.4505	47.0885	50.3943	53.4448	56.5532	58.9972	60.6266	61.8411	63.3057	64.207	64.4201	64.7832	65.8188	66.9252	67.7074	66.5569	64.9605	64.3466	64.7791	63.7556	61.4883	58.8675	56.1473	52.3413	47.7578	44.274	43.1146
5.14247	5.94094	7.18928	8.78999	10.0507	10.6356	11.8597	12.8163	12.978	13.9144	15.7365	17.1345	19.6512	25.2272	30.1369	32.6418	34.5173	36.7783	38.5445	39.7748	40.5917	40.3094	40.2862	42.4229	45.9337	49.1693	52.1119	55.0512	57.4357	59.0771	60.2	61.5728	62.4992	62.6392	62.975	63.9087	65.0565	65.7881	64.5953	63.0618	62.4739	62.7923	61.9361	59.6571	56.9919	54.321	50.7038	46.2655	42.8748	41.825
5.35415	6.06159	7.22675	8.96232	10.1565	10.9189	12.1263	13.0365	13.1569	14.186	16.0006	17.2988	20.0027	25.6263	30.6863	33.3063	35.4367	37.6377	39.3785	40.7145	41.5354	41.2931	41.3107	43.3739	46.9418	50.2262	53.306	56.2968	58.7659	60.4261	61.6559	63.098	63.968	64.1606	64.5192	65.4578	66.5973	67.3889	66.2397	64.6434	64.0045	64.4041	63.492	61.1134	58.4872	55.7002	51.9319	47.2967	43.8838	42.7051
5.19539	6.09376	7.549	9.16337	10.5659	11.3086	12.5588	13.5651	13.8503	14.9634	16.9667	18.3145	21.1233	27.0299	32.3002	35.1288	37.1567	39.5507	41.6873	43.0743	43.9716	43.7975	43.7891	46.0215	49.9312	53.5501	56.7423	60.0988	62.7095	64.4877	65.8087	67.3716	68.3859	68.6306	69.0838	70.1459	71.4656	72.3195	71.1061	69.3922	68.7717	69.3344	68.2157	65.7841	62.8878	59.9603	55.8605	50.9729	47.2538	46.046
5.11601	5.98116	7.21176	9.12029	10.2836	11.0464	12.3281	13.2641	13.47	14.3747	16.4233	17.7693	20.4715	26.3459	31.5379	34.1485	36.3561	38.6678	40.5716	42.1087	42.8883	42.6829	42.6966	45.002	48.6837	52.2318	55.4094	58.6221	61.166	62.971	64.1528	65.7633	66.7514	67.0266	67.3595	68.4629	69.7568	70.516	69.3407	67.743	67.1	67.4726	66.5173	64.0778	61.2771	58.4587	54.3222	49.5372	45.9294	44.6798
4.82495	5.45836	6.65719	8.273	9.46491	9.99797	11.0524	12.0528	12.2473	13.1446	15.0949	16.1562	18.6917	24.0231	28.7978	31.1614	33.1412	35.2774	36.915	38.2567	38.9355	38.7932	38.7345	40.7546	44.1802	47.302	50.191	53.0582	55.2777	56.8385	57.955	59.2812	60.2015	60.3826	60.6947	61.5525	62.6961	63.3311	62.3541	60.7657	60.1908	60.5038	59.611	57.3907	54.8002	52.0728	48.4417	44.0088	40.7819	39.7585
4.76321	5.50662	6.72464	8.35916	9.62018	10.3805	11.384	12.4786	12.8214	13.6276	15.4572	16.8806	19.4388	24.9494	29.7936	32.4444	34.4234	36.6959	38.5997	39.8471	40.6399	40.5847	40.5667	42.6687	46.2543	49.5727	52.5866	55.6	58.061	59.7698	60.9298	62.3581	63.3164	63.5984	64.0431	64.9834	66.2039	66.9422	65.8098	64.2501	63.5642	64.1024	63.0685	60.7515	58.0514	55.1983	51.3489	46.7831	43.2572	42.0928
5.01899	5.83638	7.17429	8.73972	10.0154	10.5505	11.8452	12.8603	13.1196	13.9823	15.8497	17.3212	19.9734	25.8329	31.0572	33.7537	35.9246	38.2498	40.0966	41.5717	42.4357	42.2949	42.3522	44.595	48.3399	51.8284	55.0077	58.2285	60.7973	62.5845	63.9638	65.4047	66.4854	66.7671	67.1995	68.252	69.6461	70.4126	69.2321	67.6711	67.0572	67.5287	66.5302	64.052	61.1831	58.2731	54.2271	49.4037	45.689	44.4578
4.675	5.59509	6.88201	8.43815	9.71898	10.3734	11.4488	12.4052	12.814	13.6578	15.4346	16.7985	19.4827	24.928	29.9996	32.7799	34.6424	36.8902	38.7378	39.9916	40.9625	40.7652	40.7878	42.9347	46.5633	50.0283	53.0979	56.1452	58.6611	60.3678	61.5818	63.1169	63.9718	64.2668	64.6912	65.6566	66.8186	67.7115	66.5319	64.9182	64.4406	64.8825	63.855	61.5486	58.782	55.9027	51.8286	47.2442	43.738	42.4411
4.65736	5.45836	6.55227	8.04322	9.01323	9.75711	10.7641	11.7444	12.0982	12.8502	14.6345	15.9994	18.494	23.7025	28.5162	30.9574	32.791	34.9889	36.7383	38.0243	38.7622	38.6127	38.6027	40.6256	44.0798	47.2646	50.0815	53.0004	55.3428	56.9333	58.1069	59.4549	60.294	60.532	60.9027	61.8039	62.9912	63.6537	62.5378	61.0363	60.4772	60.8701	59.8444	57.5975	54.9668	52.2753	48.5906	44.0937	40.7149	39.5709
4.71028	5.42619	6.55976	8.07195	9.36611	9.9413	11.0596	12.1849	12.4934	13.4087	15.3742	16.4997	19.1458	24.6287	29.6013	32.1483	34.2295	36.484	38.3898	39.6612	40.5436	40.508	40.5327	42.6647	46.2234	49.5951	52.7181	55.7661	58.1333	59.8792	61.1817	62.5997	63.6518	63.9562	64.3191	65.3848	66.6547	67.4096	66.3482	64.7491	64.1884	64.5894	63.6389	61.2858	58.4402	55.5357	51.597	46.9732	43.3636	42.3071
4.42804	5.20903	6.40238	7.79191	8.9356	9.65085	10.8146	11.6784	11.9864	12.8653	14.6722	15.9994	18.3987	23.617	28.475	30.885	32.9411	35.2008	36.788	38.1328	39.027	38.8654	38.9343	40.9964	44.4467	47.597	50.5562	53.5059	55.8416	57.4109	58.6403	60.074	60.961	61.2829	61.6388	62.5826	63.7493	64.5182	63.5144	62.0427	61.3708	61.7364	60.8038	58.4549	55.8384	53.0345	49.1447	44.6518	41.1997	40.1029
4.07524	4.84709	6.05765	7.50469	8.57567	9.24705	10.3966	11.1718	11.5465	12.5484	14.1137	15.2973	17.7909	22.876	27.5548	29.9771	31.884	33.8765	35.6999	36.9658	37.7223	37.5794	37.6759	39.6665	42.9867	46.1218	48.9421	51.7656	54.0198	55.628	56.8028	58.2015	59.1336	59.3093	59.7945	60.6765	61.8479	62.5907	61.5278	60.0256	59.4725	59.853	58.7899	56.6237	54.044	51.2292	47.532	43.111	39.8715	38.7329
3.96057	4.70231	5.94524	7.30364	8.49098	9.10536	10.2164	11.091	11.4198	12.1861	13.7816	15.1256	17.5418	22.477	27.1771	29.5297	31.4587	33.7117	35.3298	36.625	37.3997	37.1958	37.2806	39.2515	42.6275	45.711	48.5514	51.3576	53.6222	55.2306	56.399	57.8051	58.6479	58.9516	59.3265	60.2832	61.3766	62.0612	61.052	59.5859	59.0535	59.3876	58.4312	56.2187	53.6039	50.8749	47.1639	42.7996	39.43	38.3846
3.93411	4.86317	6.03517	7.52623	8.73799	9.27538	10.4686	11.304	11.5615	12.6012	14.1364	15.4243	17.908	23.0327	27.8158	30.2731	32.1905	34.4003	36.1528	37.4254	38.2904	38.1344	38.1691	40.2589	43.6588	46.8314	49.7747	52.6538	54.9343	56.5833	57.7623	59.2322	60.1282	60.3944	60.7987	61.7066	63.0076	63.7447	62.6713	61.1166	60.6739	61.0813	60.0346	57.7569	55.0992	52.3175	48.4748	43.9967	40.5573	39.4523
4.18108	5.04012	6.18505	7.66266	8.80856	9.55875	10.6777	11.5976	11.7702	12.7899	14.5968	15.8799	18.6038	23.9447	28.6261	31.3061	33.3601	35.6482	37.5171	38.9073	39.677	39.5152	39.6442	41.8184	45.3814	48.6913	51.7796	54.8129	57.3055	59.0771	60.2407	61.7276	62.769	63.1031	63.611	64.6346	65.831	66.6112	65.5928	64.0006	63.4744	63.8783	62.8005	60.4499	57.6584	54.7554	50.7947	45.9743	42.4137	41.2088
3.87237	4.6058	5.84781	7.36826	8.37806	9.05577	10.2164	10.9883	11.2931	12.2691	13.7665	15.1256	17.5418	22.6337	27.3145	29.681	31.7026	33.8588	35.5176	36.8212	37.6163	37.5207	37.71	39.7874	43.0987	46.2413	49.143	52.0147	54.3017	55.927	57.1325	58.5262	59.5346	59.8361	60.2826	61.22	62.5035	63.1987	62.1705	60.698	60.1309	60.4823	59.5073	57.2183	54.5353	51.8366	47.8876	43.3254	40.0134	38.8553
3.83709	4.41276	5.45811	6.77947	7.74288	8.40403	9.37312	10.3349	10.5997	11.3257	12.9891	14.0875	16.3773	21.1161	25.3641	27.4045	29.2446	31.2395	32.9437	34.0742	34.8384	34.7636	34.7384	36.6401	39.8196	42.6747	45.3341	47.9889	50.0581	51.4935	52.5759	53.8071	54.6385	55.0124	55.342	56.2521	57.3074	57.9041	56.9786	55.6278	55.0431	55.3752	54.373	52.2073	49.7759	47.121	43.6075	39.3944	36.1902	35.1662
3.74007	4.50124	5.53306	6.83691	8.06047	8.54571	9.68304	10.5698	10.9799	11.6578	13.5175	14.7447	17.0804	22.0209	26.25	28.5559	30.4517	32.5285	34.2859	35.582	36.2779	36.1715	36.3071	38.2682	41.5615	44.557	47.3938	50.1625	52.3426	53.9509	55.1765	56.4196	57.3526	57.6896	58.0583	59.0301	60.262	60.8286	59.8834	58.516	57.9932	58.4179	57.3291	55.1631	52.5102	49.7867	45.9978	41.5985	38.3264	37.2672
3.88119	4.6621	5.88528	7.14567	8.20162	8.89284	10.0866	10.9809	11.226	12.254	13.7967	15.0434	17.6224	22.6195	27.2938	29.8455	31.7152	33.9118	35.6723	36.9865	37.8378	37.7554	37.897	40.0131	43.4463	46.7119	49.6798	52.5238	54.9632	56.5833	57.6771	59.2284	60.2054	60.4652	60.9467	61.954	63.2043	63.997	62.9551	61.4549	60.9689	61.3787	60.4495	58.037	55.3171	52.5663	48.5492	43.9239	40.5652	39.3107
3.89883	4.54949	5.71292	7.11695	8.22279	8.85033	9.89205	10.6726	11.0172	11.9446	13.6533	14.9538	17.2635	22.2418	26.8131	29.0625	31.1647	33.2525	34.899	36.2739	37.1301	37.0289	37.2466	39.2434	42.6237	45.8081	48.7157	51.6356	53.868	55.4494	56.725	58.1336	59.0951	59.4312	59.8505	60.8225	62.0978	62.8802	61.9034	60.4908	59.8616	60.2625	59.3128	57.0374	54.3729	51.457	47.5857	43.0301	39.6744	38.5415
3.49311	4.10713	5.38317	6.60714	7.5735	8.29776	9.27942	10.1513	10.4953	11.371	12.9967	14.2368	16.4286	21.3298	25.4397	27.694	29.5823	31.4808	33.2917	34.4873	35.2283	35.2014	35.3506	37.2446	40.5534	43.4403	46.1485	48.8555	51.0955	52.5837	53.7132	55.0416	55.9917	56.2625	56.6501	57.6026	58.754	59.5049	58.552	57.1501	56.7062	57.056	56.0196	53.8446	51.2883	48.5593	44.7778	40.5591	37.2189	36.1191
3.48429	4.39668	5.19582	6.48507	7.61585	8.20567	9.14248	10.0265	10.2419	11.0691	12.7249	14.0501	16.2748	20.9165	25.2886	27.5755	29.2821	31.4514	33.264	34.2963	35.1898	35.1292	35.2443	37.1801	40.3603	43.2723	46.0499	48.8049	50.9979	52.6019	53.6539	55.0869	55.9763	56.3254	56.8142	57.6958	58.8195	59.5173	58.6063	57.2516	56.873	57.0991	56.1795	54.0471	51.4036	48.6648	44.9556	40.5228	37.2465	36.2684
3.41373	4.16343	5.15085	6.31274	7.41824	7.94355	8.99113	9.85768	10.2195	10.9107	12.6042	13.8485	16.2821	20.8453	24.9589	27.3124	29.1007	31.2513	32.8608	34.0588	34.9635	34.899	35.07	37.1278	40.2599	43.1527	45.9257	48.646	50.8063	52.416	53.5835	54.8944	55.8259	56.1721	56.6541	57.5498	58.6966	59.4387	58.5186	57.1713	56.702	57.0345	55.9894	53.9308	51.3225	48.5256	44.7985	40.4014	37.0967	36.0502
3.45783	4.33233	5.37568	6.62868	7.53821	8.19858	9.35871	10.1587	10.473	11.2201	12.9967	14.0203	16.7655	21.3583	25.6869	28.2203	30.0326	32.1224	33.9876	35.1844	36.0083	36.0632	36.1923	38.24	41.604	44.6765	47.5508	50.4441	52.7185	54.3483	55.4914	56.9821	57.9501	58.2715	58.8064	59.833	60.9832	61.7468	60.9268	59.459	59.0278	59.4393	58.2886	56.0119	53.4458	50.4827	46.5891	42.0555	38.6339	37.5044
3.36963	3.99452	5.03094	6.2194	7.30531	7.95772	8.91906	9.93109	10.1822	10.9031	12.5891	13.7962	16.0697	20.8453	25.0894	27.2597	29.0882	31.0923	32.8387	34.1207	34.9154	34.9306	35.1423	37.027	40.3217	43.3245	46.0061	48.7688	50.9617	52.4925	53.7502	55.0605	55.9955	56.3883	56.8182	57.8621	59.0777	59.7614	58.8567	57.4884	57.0098	57.3749	56.266	54.0988	51.3951	48.6057	44.844	40.4459	37.144	36.0158
3.23732	3.80953	4.87357	6.06861	7.01596	7.92938	8.65238	9.50529	9.78708	10.6163	12.257	13.3855	15.6449	20.1684	24.2859	26.6281	28.4377	30.4566	32.0599	33.341	34.2076	34.2537	34.3218	36.213	39.414	42.3199	44.969	47.8012	49.8954	51.3878	52.5462	53.943	54.9624	55.2011	55.662	56.5319	57.6885	58.4543	57.638	56.2325	55.7913	56.0562	55.1164	52.9742	50.5022	47.5723	43.7771	39.4672	36.2572	35.2236
3.1844	3.80149	4.88106	6.11887	7.05124	7.70977	8.7677	9.58604	9.89145	10.7597	12.2117	13.4751	15.8866	20.3893	24.492	26.8123	28.6066	30.7745	32.4521	33.6921	34.4484	34.5155	34.7214	36.6361	39.8659	42.7979	45.524	48.3067	50.5316	52.1061	53.2723	54.6528	55.6332	55.9756	56.4941	57.4971	58.6392	59.3684	58.5019	57.167	56.6891	57.0776	56.0758	53.892	51.2755	48.475	44.5793	40.1992	36.9036	35.7479
3.3608	3.97039	4.85858	6.06143	7.12182	7.70977	8.74608	9.47592	9.87654	10.722	12.3325	13.4527	15.7987	20.261	24.4301	26.8189	28.6441	30.6332	32.2422	33.5476	34.3858	34.4117	34.6321	36.5072	39.611	42.6224	45.3451	48.1045	50.3039	51.8508	52.9204	54.3847	55.3864	55.7515	56.1581	57.193	58.3442	59.0582	58.2014	56.8457	56.3343	56.6725	55.7171	53.5214	50.9978	48.1333	44.2278	39.815	36.6316	35.5489
3.21968	3.81758	4.80612	6.20504	7.12888	7.61059	8.53707	9.43921	9.75726	10.6541	12.3325	13.3407	15.6449	20.204	24.3752	26.6149	28.3814	30.3566	32.082	33.3359	34.2847	34.2628	34.4111	36.3702	39.5145	42.4394	45.2319	47.9492	50.0761	51.6831	52.8797	54.2753	55.2592	55.5706	55.994	57.0308	58.2212	58.9382	58.0136	56.6934	56.1803	56.5733	55.6177	53.431	50.7286	47.9393	44.1079	39.7382	36.5094	35.4533
2.99918	3.57628	4.66373	5.70959	6.64897	7.2918	8.23436	9.07214	9.3994	10.1635	11.6683	12.8104	15.0663	19.4773	23.5649	25.6938	27.4432	29.4972	31.2038	32.3032	33.2255	33.2069	33.3355	35.274	38.4291	41.3265	43.9866	46.6927	48.811	50.3086	51.4904	52.9275	53.8405	54.1789	54.7259	55.6398	56.7665	57.5318	56.699	55.3868	54.9191	55.289	54.2995	52.1211	49.5708	46.7077	42.9087	38.6624	35.5123	34.3358
3.008	3.60041	4.54382	5.51571	6.34549	7.0226	8.03976	8.92531	9.07882	9.922	11.472	12.676	14.7733	19.2849	23.0773	25.0885	26.8177	28.8792	30.3587	31.6216	32.3781	32.3405	32.5958	34.5326	37.6142	40.404	43.0372	45.6493	47.723	49.2476	50.4865	51.7307	52.6146	53.031	53.5017	54.5043	55.6437	56.3695	55.5387	54.2788	53.8288	54.1642	53.2061	50.9405	48.3575	45.6026	41.9079	37.6676	34.4717	33.4901
2.99918	3.60846	4.53633	5.61624	6.52193	7.16429	7.9893	8.94733	9.2652	10.0126	11.4569	12.6909	14.8612	19.2493	23.1872	25.2859	27.0116	28.991	30.5244	31.7455	32.5803	32.539	32.8296	34.6938	37.8807	40.6393	43.2928	45.9526	48.0121	49.5211	50.6791	52.0403	52.9924	53.3927	53.8138	54.7922	55.9469	56.6798	55.7557	54.5199	54.1153	54.4012	53.4827	51.2981	48.648	45.9316	42.2677	37.9749	34.8186	33.758
3.12266	3.63259	4.59628	5.83165	6.75483	7.2918	8.25598	9.02075	9.41431	10.2088	11.7739	12.9075	14.9931	19.3918	23.5374	25.6477	27.5245	29.5973	31.2314	32.4684	33.3362	33.2791	33.4971	35.3667	38.4716	41.3862	44.0925	46.8047	48.9809	50.5018	51.6683	53.0445	54.0217	54.4305	54.9019	55.7452	57.0656	57.7966	56.9118	55.6828	55.1542	55.4787	54.4508	52.3064	49.6819	46.9017	43.0948	38.804	35.5832	34.5233
3.19322	3.66476	4.55132	5.74549	6.57839	7.21388	8.23436	8.86658	9.19065	10.1182	11.4569	12.6162	15.059	19.2493	23.1803	25.4503	27.2431	29.144	30.7619	32.0037	32.8211	32.8684	33.0422	34.9355	37.9541	40.8186	43.4936	46.1584	48.2796	49.8018	50.8792	52.2668	53.1967	53.605	54.0698	54.9179	56.1108	56.9238	55.9686	54.7821	54.3034	54.6253	53.6124	51.436	48.9684	46.2226	42.3711	38.0963	34.9605	33.8689
2.88452	3.56824	4.39394	5.56598	6.61368	7.12178	8.06859	9.04277	9.41431	10.1484	11.7136	12.8328	15.1395	19.4773	23.3863	25.7464	27.5183	29.6385	31.2866	32.52	33.3747	33.4731	33.6501	35.7133	38.8308	41.7298	44.4687	47.1982	49.4074	51.0159	52.2239	53.6939	54.6694	55.1225	55.574	56.5968	57.8115	58.6569	57.759	56.4905	56.0991	56.3665	55.2633	53.0992	50.4125	47.5976	43.7399	39.2327	35.9419	34.9405
2.9198	3.43151	4.19159	5.50135	6.3949	7.01552	8.02534	8.71975	8.95208	9.81634	11.3664	12.5341	14.7001	18.9286	22.8713	24.9964	26.7427	28.8497	30.3808	31.6009	32.5466	32.5841	32.8126	34.8711	37.8614	40.7663	43.4498	46.1223	48.2363	49.7289	50.957	52.3348	53.3355	53.7701	54.3418	55.3113	56.4182	57.2878	56.4485	55.2345	54.7951	55.0434	54.1007	51.8927	49.2803	46.4293	42.5406	38.1771	34.9368	33.9684
2.72576	3.27869	4.06419	5.2285	6.1126	6.6188	7.58569	8.36736	8.5644	9.28805	10.8758	11.8843	13.997	18.1092	21.9167	24.0226	25.8295	27.7785	29.2319	30.3359	31.2467	31.2801	31.4522	33.3156	36.2353	39.0222	41.6057	44.2087	46.1723	47.6835	48.7787	50.13	51.0571	51.5213	51.9655	52.8821	54.0086	54.7977	54.0237	52.7861	52.358	52.5955	51.633	49.622	47.0715	44.3836	40.5846	36.3694	33.2538	32.2846
2.61991	3.10979	4.10916	5.10643	5.93616	6.54088	7.39109	8.32331	8.66132	9.39371	10.6946	11.8022	13.748	17.9026	21.6214	23.5752	25.3041	27.3193	28.9116	30.0777	30.9434	30.8965	31.0951	32.9086	35.8375	38.5068	40.9703	43.5407	45.5686	47.0054	48.1933	49.4958	50.4056	50.7901	51.2774	52.1846	53.2669	53.9745	53.2182	52.0334	51.5714	51.9404	50.9242	48.8594	46.405	43.6708	40.0553	35.872	32.8006	31.8101
2.68165	3.30282	3.96677	5.19978	5.95027	6.39211	7.23974	8.03699	8.32582	9.08429	10.5361	11.5931	13.6601	17.7174	21.3192	23.3317	24.9413	26.8014	28.2819	29.3858	30.1923	30.1926	30.4235	32.2195	35.1152	37.7599	40.2216	42.685	44.5818	46.0647	47.0968	48.4765	49.2876	49.6972	50.1533	51.0328	52.1933	52.8205	52.0747	50.8748	50.4341	50.669	49.7703	47.7176	45.2472	42.5361	39.0504	34.9661	31.9886	30.9912
2.81396	3.35108	4.08667	5.17105	6.06319	6.76049	7.61452	8.35267	8.80297	9.51446	11.0041	12.1383	14.1874	18.3444	22.2944	24.5029	26.2361	28.2494	29.7843	30.94	31.8822	32.0291	32.277	34.0893	37.1623	40.0455	42.6683	45.4182	47.5458	49.0398	50.1864	51.7043	52.6647	53.1057	53.6937	54.5772	55.783	56.6136	55.8935	54.5749	54.1751	54.5047	53.5562	51.3671	48.7377	45.8809	41.9948	37.7201	34.456	33.4135
2.69048	3.18217	4.01923	5.17105	5.94322	6.59755	7.57128	8.20584	8.51966	9.41635	10.7475	11.9516	14.2387	18.2803	21.8961	24.1147	25.9296	27.8197	29.497	30.6612	31.55	31.6004	31.8391	33.8354	36.7992	39.6048	42.3141	44.8983	47.0073	48.6169	49.7233	51.1644	52.2908	52.6575	53.1897	54.2325	55.3568	56.0717	55.3551	54.1774	53.7946	54.0392	53.0505	50.8026	48.2806	45.4254	41.6308	37.2065	34.1367	32.9428
2.68165	3.07761	3.94428	4.97	5.80207	6.35669	7.35506	8.08104	8.296	9.24277	10.4606	11.6229	13.6161	17.6319	21.2093	23.3975	25.1102	27.078	28.6299	29.7472	30.6834	30.7566	30.9804	32.7756	35.6869	38.462	40.9958	43.4685	45.6228	47.0528	48.1489	49.5826	50.529	50.9749	51.5255	52.4684	53.5579	54.3427	53.5563	52.3929	51.9775	52.2636	51.3002	49.2084	46.6357	43.966	40.2	35.9488	32.8321	31.7718
2.56699	3.02936	3.80189	4.87666	5.67503	6.17958	6.92982	7.66257	7.99033	8.91071	10.0455	11.1151	13.0742	17.0761	20.6806	22.7527	24.516	26.2481	27.84	29.0037	29.7783	29.8722	30.0239	31.748	34.6324	37.3677	39.8711	42.3059	44.2456	45.7402	46.8486	48.2311	49.1874	49.4928	50.0573	50.9882	52.0621	52.8288	52.0663	50.8748	50.4341	50.7035	49.7876	47.7822	45.26	42.4223	38.8106	34.7679	31.7758	30.6582
2.53171	3.10174	3.75693	4.79767	5.71738	6.19375	7.09559	7.78738	8.05743	8.96353	10.272	11.4586	13.4916	17.2542	20.9621	22.9962	24.6286	26.5718	28.1714	29.2412	30.2067	30.2061	30.4447	32.3081	35.2157	37.9317	40.4371	42.9666	44.9794	46.4694	47.545	48.9182	49.8389	50.2987	50.7934	51.7263	52.8407	53.5857	52.8801	51.674	51.2721	51.5482	50.5698	48.5707	45.9607	43.152	39.5012	35.2896	32.1896	31.2399
2.32003	2.87654	3.59206	4.66124	5.6468	6.15833	6.89378	7.66257	8.00524	8.82014	10.2342	11.2943	13.2499	17.2614	20.8866	22.9633	24.5786	26.5071	28.0388	29.2515	30.1153	30.2242	30.4575	32.2598	35.1693	37.9242	40.4554	42.9847	44.9577	46.4658	47.6673	49.1145	50.0509	50.5188	50.9734	52.0386	53.1481	53.9249	53.2307	51.9911	51.6056	51.8973	50.8896	48.8335	46.2298	43.4093	39.7741	35.5201	32.434	31.4389
2.39059	2.95697	3.58456	4.49609	5.29393	5.87496	6.76405	7.44967	7.72939	8.5409	9.88702	10.9807	12.913	16.7341	20.3715	22.3448	24.0344	25.8007	27.4202	28.5131	29.292	29.5292	29.7688	31.5666	34.4857	37.11	39.5826	42.0315	44.1155	45.5579	46.6744	48.0574	48.9522	49.4613	50.0493	50.9315	52.0089	52.8536	52.0955	50.9678	50.5965	50.8586	49.8092	47.6874	45.2728	42.5446	38.8809	34.7072	31.5945	30.6353
2.41705	2.80415	3.49463	4.54636	5.27981	5.95997	6.69198	7.37626	7.69212	8.51826	9.66059	11.018	12.8837	16.727	20.2754	22.2132	23.8718	25.7419	27.2711	28.446	29.292	29.4886	29.8113	31.5304	34.4046	36.9943	39.5095	41.9954	44.0287	45.4631	46.6448	48.0536	49.0563	49.5164	50.1173	51.0328	52.14	52.9239	52.1623	50.9847	50.6307	50.8155	49.874	47.7564	45.2685	42.5783	38.7981	34.6951	31.6654	30.5855
2.22301	2.88458	3.43468	4.32376	5.16689	5.63409	6.49017	7.20006	7.49828	8.26921	9.53228	10.6371	12.5834	16.1071	19.7397	21.6145	23.1025	25.0709	26.4757	27.5682	28.3435	28.4688	28.7315	30.5148	33.1995	35.8365	38.1839	40.6234	42.6118	43.9829	45.037	46.4001	47.229	47.645	48.189	49.0903	50.2222	50.9757	50.2425	49.1917	48.8094	49.0399	48.0675	46.0027	43.5468	40.9038	37.2433	33.2433	30.2465	29.3494
2.09953	2.60307	3.32976	4.2376	5.08926	5.57034	6.25954	6.92108	7.26716	8.02016	9.3134	10.3533	12.166	15.701	19.1079	21.0486	22.4832	24.1644	25.7024	26.8402	27.631	27.7062	27.9705	29.6041	32.4425	34.9476	37.2929	39.5691	41.4478	42.8198	43.9997	45.2826	46.1572	46.5836	47.0449	47.9264	49.0338	49.7761	49.0613	47.8386	47.4711	47.76	46.771	44.8911	42.4616	39.8198	36.2756	32.3576	29.4188	28.4425
2.21419	2.50656	3.36723	4.34531	4.94811	5.62701	6.46134	7.12665	7.43863	8.23148	9.50964	10.4803	12.2685	16.1285	19.4994	21.5092	23.19	24.8825	26.3597	27.594	28.5168	28.6358	28.8803	30.6398	33.4776	36.0979	38.6002	40.9772	42.9299	44.3949	45.5779	46.9739	47.9614	48.4431	48.9491	49.9744	51.05	51.8195	51.1523	49.9233	49.4764	49.8157	48.9016	46.83	44.3884	41.5871	37.9173	33.8135	30.8614	29.8087
2.06425	2.72372	3.45716	4.38839	5.22335	5.66952	6.43251	7.15601	7.63247	8.29185	9.52473	10.5849	12.415	16.214	19.8221	21.8185	23.1775	25.0473	26.6635	27.8212	28.6565	28.8298	29.0631	30.8654	33.6939	36.3855	38.8449	41.2913	43.2624	44.7558	45.8668	47.3439	48.239	48.6711	49.1852	50.1528	51.3204	52.1008	51.386	50.2658	49.8782	50.126	49.2171	47.1101	44.6405	41.836	38.2068	34.1047	31.0112	30
2.20537	2.59503	3.43468	4.35967	4.97634	5.56325	6.46134	7.05323	7.461	8.22393	9.487	10.4504	12.4077	16.2852	19.7123	21.5882	23.215	24.9708	26.5033	27.8677	28.5746	28.6764	28.9866	30.805	33.6862	36.2809	38.7354	41.1938	43.1395	44.6683	45.7853	47.1325	48.0424	48.5886	49.1532	50.0595	51.2794	52.0098	51.3568	50.2531	49.8312	50.182	49.2085	47.054	44.5978	41.8866	38.1117	34.044	30.956	29.9005
2.13481	2.55481	3.35224	4.10835	4.86342	5.47824	6.20188	6.7816	7.31935	8.03526	9.28321	10.3085	12.1367	15.7152	19.259	21.0552	22.6709	24.3292	25.719	26.9331	27.8139	28.0086	28.2936	29.9668	32.8017	35.3659	37.8188	40.1901	42.1057	43.4506	44.5887	45.9508	46.8936	47.4013	47.909	48.7943	49.9271	50.7233	49.9712	48.8408	48.4331	48.7038	47.752	45.7787	43.4101	40.6254	36.9786	32.9521	29.9943	28.9629
1.9584	2.46634	3.12742	4.11553	4.74344	5.25155	6.02169	6.75223	7.0435	7.82394	9.05678	9.90525	11.6606	15.2378	18.4074	20.2657	21.9578	23.564	24.9568	26.0863	26.8991	27.0609	27.3584	28.9553	31.643	34.1111	36.5552	38.8145	40.6924	42.0213	43.1254	44.3879	45.3014	45.7423	46.1728	47.0951	48.165	48.953	48.2558	47.2169	46.8084	47.023	46.1443	44.1887	41.6926	39.0226	35.523	31.5609	28.7646	27.834
2.09953	2.47438	3.06746	4.00064	4.7505	5.25863	6.1226	6.74489	6.99877	7.8013	9.01904	10.0023	11.8144	15.2663	18.3937	20.2591	21.8765	23.564	24.9678	26.1121	26.9569	27.0429	27.3414	29.0923	31.7859	34.2007	36.6502	38.9047	40.8297	42.2255	43.281	44.5766	45.5173	45.9939	46.4848	47.383	48.5175	49.2508	48.5438	47.5341	47.1334	47.4066	46.4425	44.5334	42.0215	39.4065	35.8621	31.7793	28.9459	27.9832
1.94958	2.53069	3.20985	4.05809	4.70815	5.17362	5.88475	6.58338	6.99877	7.81639	9.02659	10.0173	11.873	15.3946	18.6547	20.4828	22.0392	23.823	25.4207	26.5665	27.371	27.5122	27.8303	29.6283	32.4039	34.9364	37.2783	39.6413	41.5888	43.0787	44.1738	45.5657	46.4734	46.9413	47.5169	48.4779	49.5788	50.3717	49.6331	48.5447	48.2279	48.4969	47.5014	45.421	43.0042	40.2205	36.6106	32.6326	29.7144	28.6529
2.03779	2.43417	3.12742	3.82113	4.63052	5.20904	6.07214	6.63477	6.99877	7.71074	8.88318	9.89031	11.7558	15.2877	18.5242	20.4302	21.9954	23.8053	25.36	26.4632	27.2506	27.4355	27.7367	29.4872	32.2185	34.802	37.1943	39.5907	41.4948	42.9839	44.1294	45.5318	46.404	46.8627	47.4849	48.5144	49.6116	50.3056	49.6415	48.5617	48.2151	48.5055	47.5186	45.4383	43.0896	40.3302	36.6023	32.5719	29.6671	28.6032
1.77318	2.28135	3.00001	3.89294	4.52466	5.01068	5.91358	6.55401	6.83475	7.72583	8.80016	9.68867	11.646	14.9884	18.1465	20.0749	21.5763	23.305	24.7082	25.9675	26.8317	26.9256	27.2521	28.9956	31.6932	34.2866	36.6246	38.9047	40.7864	42.2	43.3329	44.7201	45.6561	46.0292	46.6328	47.6588	48.751	49.5238	48.8109	47.7878	47.3215	47.6091	46.6889	44.6713	42.2053	39.5288	35.8745	31.8642	29.0405	27.9144
1.94076	2.3457	2.94006	3.90012	4.54583	4.9115	5.69015	6.46591	6.67819	7.4164	8.69449	9.59905	11.3969	14.9884	18.2152	19.9959	21.4637	23.1932	24.6474	25.6939	26.6295	26.6413	26.997	28.7417	31.4692	33.9654	36.3325	38.6339	40.5803	41.9521	43.0662	44.4067	45.2937	45.7855	46.3208	47.2897	48.4601	49.1805	48.5063	47.4622	47.1248	47.2816	46.4036	44.3482	41.8464	39.1871	35.6264	31.6256	28.7764	27.6618
1.89666	2.28135	2.91008	3.85704	4.52466	4.76982	5.65412	6.39984	6.53653	7.18245	8.36994	9.24804	11.0234	14.4683	17.5559	19.3643	20.8695	22.4457	23.9515	25.0381	25.8833	25.8742	26.1808	27.7544	30.3568	32.7591	35.131	37.3738	39.1272	40.563	41.6139	42.8627	43.7709	44.1894	44.6726	45.5986	46.6898	47.3646	46.7283	45.7369	45.2906	45.5706	44.649	42.629	40.2357	37.6729	34.2948	30.4609	27.6137	26.7089
1.68498	2.28135	2.8876	3.79241	4.4682	5.02485	5.92079	6.34845	6.55145	7.22773	8.45296	9.54677	11.2651	14.5894	17.6658	19.4564	20.8945	22.5457	24.0564	25.1517	25.8881	26.1269	26.4061	28.0526	30.6195	33.1737	35.5291	37.7818	39.6152	40.9093	41.977	43.2968	44.222	44.6022	45.2606	46.0974	47.1652	47.9685	47.3251	46.2528	45.8678	46.0792	45.2281	43.1891	40.8552	38.2508	34.7166	30.7925	28.0669	27.0036
1.74672	2.26526	2.94755	3.84268	4.52466	5.05319	5.79826	6.48059	6.61109	7.37112	8.55108	9.56171	11.2724	14.8744	18.0435	19.8578	21.4137	23.099	24.6806	25.7558	26.5621	26.7496	27.0778	28.8062	31.5039	33.9841	36.3836	38.7025	40.6598	42.1198	43.2143	44.5011	45.5019	45.9703	46.4608	47.4763	48.5502	49.3087	48.6774	47.6863	47.2702	47.4712	46.5635	44.5334	42.0515	39.3769	35.8124	31.7348	28.804	27.8876
1.90548	2.24918	3.015	3.77805	4.55289	5.0461	5.70457	6.34111	6.74529	7.52206	8.67185	9.58411	11.4189	14.9314	18.0709	19.8907	21.4762	23.0107	24.5922	25.761	26.5477	26.8444	27.0991	28.7699	31.4808	34.0961	36.4639	38.8614	40.649	42.1089	43.2366	44.6031	45.6522	46.0371	46.5688	47.5858	48.7469	49.4535	48.9487	47.8216	47.3856	47.6651	46.6672	44.6756	42.1754	39.4529	35.8662	31.7874	28.934	27.8991
1.8261	2.21701	2.94755	3.77087	4.39057	4.84066	5.62529	6.26769	6.68564	7.24282	8.39258	9.43475	11.1552	14.6464	17.7482	19.4696	21.0322	22.8165	24.189	25.4099	26.1336	26.339	26.6909	28.3508	31.0791	33.5957	35.8906	38.1898	40.0887	41.4963	42.6883	43.9462	44.9197	45.3727	45.9247	46.9126	48.0626	48.7834	48.1473	47.0943	46.6887	46.9196	45.9974	43.9475	41.4661	38.837	35.2376	31.2859	28.4177	27.3863
1.782	2.12049	2.65528	3.53392	4.19296	4.60688	5.40186	6.01808	6.29796	6.88811	8.0001	8.97171	10.7085	13.9482	17.0683	18.6011	20.1127	21.81	23.1451	24.2326	25.0889	25.3192	25.5771	27.2265	29.7157	32.169	34.4372	36.6626	38.4621	39.801	40.873	42.1491	43.0808	43.6193	44.1205	45.0025	46.0915	46.7152	46.1232	45.2379	44.816	44.9759	44.0828	42.1809	39.7145	37.1415	33.6331	29.7895	27.0067	26.066
1.79082	2.03202	2.64029	3.43339	4.04475	4.58563	5.26492	5.86391	6.21595	6.79755	8.06049	8.93437	10.5181	13.7558	16.7387	18.4168	19.9063	21.5627	22.8247	23.9383	24.7711	24.9717	25.2498	26.9283	29.3835	31.7881	33.988	36.1824	37.9922	39.2322	40.2914	41.5527	42.4409	42.896	43.5044	44.3009	45.3785	46.0988	45.5263	44.6078	44.1533	44.3423	43.4216	41.4441	39.1078	36.5383	33.0707	29.2557	26.5022	25.5455
1.49094	2.1044	2.72273	3.51238	4.10121	4.59271	5.29375	6.05479	6.46944	6.88057	8.07558	8.93437	10.5473	13.884	16.9653	18.6011	20.0439	21.7275	23.0788	24.2377	25.1178	25.256	25.5134	27.1338	29.7466	32.0869	34.3386	36.5362	38.3284	39.6588	40.8953	42.1642	43.05	43.5525	44.1005	44.9254	46.0669	46.7317	46.1565	45.1787	44.7605	45.0147	44.1217	42.0688	39.7059	37.1246	33.6662	29.7572	26.9712	25.9742
1.61442	2.09636	2.74521	3.45493	3.98829	4.5998	5.29375	5.9153	6.05194	6.87302	7.84915	8.96425	10.5986	13.7629	16.7455	18.5616	20.0564	21.5981	23.0733	24.1396	24.9059	25.0619	25.4666	27.0855	29.6655	32.0495	34.3094	36.5579	38.4079	39.728	40.7397	42.051	42.9883	43.5014	44.0325	44.9903	45.9194	46.6904	46.1357	45.0984	44.7605	45.0362	44.1174	42.0775	39.7828	37.1625	33.6455	29.7451	26.9515	26.0239
1.5615	2.15266	2.68526	3.30414	4.20001	4.54312	5.14239	5.89328	6.1414	6.78246	7.92463	8.88956	10.5693	13.7772	16.8073	18.5813	19.9626	21.6451	23.1451	24.1396	24.9252	25.1432	25.4113	27.0694	29.6539	32.0645	34.3423	36.6409	38.4043	39.8083	40.9768	42.2322	43.2428	43.7058	44.1925	45.112	46.1817	46.9427	46.3444	45.2379	45.0042	45.2129	44.3075	42.3963	40.0007	37.2596	33.8109	29.8623	27.0697	26.177
1.24397	1.72638	2.22811	2.8805	3.59307	4.12516	4.7532	5.4014	5.64189	6.2919	7.30572	8.23236	9.71973	12.6372	15.3927	17.193	18.4365	19.9029	21.3113	22.3272	23.0571	23.3066	23.6386	25.1431	27.4716	29.7676	31.8882	33.9871	35.6896	37.0009	38.0057	39.1629	40.0623	40.4978	41.0441	41.8839	42.8665	43.4888	42.9805	42.0452	41.6906	41.8729	40.9495	39.1389	36.8563	34.3745	31.0031	27.3186	24.6773	23.7393
1.5174	1.72638	2.40048	3.08873	3.6707	4.13932	4.79644	5.25457	5.53006	6.29945	7.23024	8.09046	9.69776	12.573	15.3446	17.0549	18.3677	19.9911	21.1621	22.1982	23.0475	23.2344	23.5961	25.0907	27.4794	29.7378	31.8298	33.9727	35.7149	36.9097	37.9464	39.1893	40.0199	40.4703	41.0921	41.8636	42.8747	43.4805	42.9805	42.041	41.7548	41.9117	41.0014	39.1088	36.8947	34.3745	30.9782	27.2983	24.7325	23.7814
1.42038	1.74247	2.43045	3.16054	3.6213	4.25267	4.80365	5.30596	5.791	6.36737	7.35855	8.20248	9.85889	12.9008	15.7978	17.3444	18.7242	20.1854	21.5709	22.761	23.4182	23.6496	23.9872	25.538	27.9429	30.3316	32.4068	34.5179	36.2607	37.617	38.6984	39.9784	40.8256	41.2841	41.8282	42.768	43.8295	44.4071	43.836	42.8487	42.5671	42.8857	41.9565	40.005	37.7107	35.1843	31.6564	27.9899	25.2252	24.2636
1.61442	2.03202	2.61032	3.23234	3.81891	4.15349	4.83248	5.46747	5.73881	6.20134	7.42648	8.30704	9.85889	13.1217	15.894	17.5483	19.0181	20.5444	21.9796	23.0398	23.8612	24.0512	24.3273	25.9491	28.4411	30.6901	32.9473	35.1281	36.8861	38.266	39.3023	40.5069	41.4771	41.9564	42.4363	43.4331	44.395	45.1847	44.5372	43.6944	43.3581	43.5494	42.6307	40.7159	38.3473	35.8086	32.3429	28.4792	25.7375	24.8184
1.6938	2.05614	2.53537	3.01693	3.76951	4.196	4.76761	5.51886	5.76863	6.37492	7.60762	8.48628	9.96142	13.2	16.0245	17.7194	19.1808	20.8211	22.2668	23.1792	24.0393	24.2813	24.6121	26.2553	28.6651	30.9553	33.2175	35.37	37.1319	38.5176	39.6023	40.8882	41.8048	42.263	42.8203	43.7494	44.813	45.4577	44.8627	43.9186	43.6403	43.8597	42.903	40.9874	38.6378	36.0321	32.6241	28.7664	25.9701	25.0634
1.32335	1.61378	2.28806	2.83742	3.46603	4.03306	4.55139	5.07837	5.47787	6.01267	7.10948	8.09793	9.41212	12.3806	15.1454	16.7259	18.1112	19.6674	20.8086	21.9348	22.7442	22.9817	23.2943	24.728	27.1511	29.4054	31.5523	33.6802	35.3896	36.6108	37.7019	38.8949	39.7539	40.2777	40.7641	41.5797	42.5714	43.3688	42.8052	41.9015	41.541	41.6962	40.8112	38.9623	36.7623	34.1805	30.8873	27.2458	24.5472	23.6551
1.28807	1.59769	2.15317	2.77997	3.339	3.78511	4.37841	4.85078	5.09765	5.89191	6.98117	7.6797	9.14845	12.0671	14.7128	16.193	17.6359	19.067	20.2342	21.3926	22.152	22.368	22.7204	24.1276	26.5176	28.7854	30.8219	32.8823	34.5546	35.754	36.7906	38.0152	38.9019	39.3538	39.8159	40.7768	41.715	42.4257	41.9872	41.0388	40.626	40.9204	40.016	38.1177	35.9847	33.4086	30.0437	26.4208	23.9127	23.0925
1.24397	1.75051	2.25809	2.95948	3.50838	3.87721	4.54418	5.07837	5.38841	6.01267	7.04155	7.91869	9.5586	12.5232	15.3858	16.9233	18.2488	19.844	21.2063	22.2653	23.1245	23.3156	23.6471	25.3083	27.6686	30.0664	32.2571	34.4204	36.1198	37.5077	38.5317	39.8915	40.7369	41.3038	41.8162	42.7274	43.8991	44.5767	44.0155	43.1362	42.7681	42.9848	42.0386	40.1084	37.7236	35.1548	31.6234	27.8443	25.1148	24.1067
1.30571	1.51726	2.22811	2.97384	3.55778	4.11099	4.78203	5.32798	5.58225	6.23153	7.26043	8.14274	9.7124	12.6657	15.4751	17.068	18.4239	20.103	21.3776	22.4718	23.2305	23.5232	23.8257	25.4333	27.8424	30.2345	32.363	34.5865	36.3692	37.6207	38.691	39.9784	40.9027	41.4296	41.9562	42.8612	43.8991	44.5725	44.0781	43.187	42.7039	43.0063	42.0429	40.1084	37.7663	35.2476	31.6854	27.9697	25.1897	24.2521
1.40274	1.69421	2.26558	2.90922	3.58601	4.04015	4.53697	5.06369	5.38095	5.98248	7.24534	8.01578	9.47803	12.5303	15.3721	16.9891	18.4114	19.9911	21.2174	22.2085	23.0475	23.2886	23.5876	25.1149	27.63	29.8535	32.0453	34.1388	35.8848	37.092	38.1724	39.4461	40.3283	40.7888	41.3121	42.257	43.2886	43.9521	43.427	42.5189	42.1567	42.3297	41.4292	39.5655	37.2579	34.7035	31.2719	27.5653	24.902	24.0684
1.24397	1.51726	2.00328	2.69381	3.31077	3.74969	4.20544	4.70395	5.09765	5.71833	6.64152	7.52287	8.85549	11.6539	14.342	15.7784	17.1542	18.5608	19.7868	20.742	21.5261	21.7904	22.1082	23.5554	25.8108	27.9675	29.9747	32.0013	33.5931	34.744	35.7384	36.9166	37.7453	38.2177	38.8118	39.552	40.5184	41.2303	40.7351	39.8125	39.5187	39.6146	38.7195	37.0018	34.8867	32.3794	29.1298	25.6483	23.1401	22.3463
1.23515	1.51726	2.14567	2.74407	3.23313	3.75678	4.37121	4.80674	5.07528	5.77871	6.73209	7.45566	8.98732	11.6539	14.287	15.9298	17.2418	18.6727	19.8807	20.835	21.7139	21.9303	22.257	23.7246	26.0039	28.1804	30.2632	32.2432	33.9582	35.1487	36.1422	37.4452	38.3699	38.768	39.3119	40.1522	41.1208	41.826	41.3695	40.4595	40.113	40.3645	39.4801	37.6179	35.4678	32.9235	29.564	25.9435	23.4831	22.6371
1.31453	1.63791	2.25809	2.81588	3.35311	3.65051	4.50094	4.97559	5.33622	5.91455	6.92079	7.58262	9.3462	12.231	14.9051	16.4101	17.7735	19.379	20.77	21.8883	22.6479	22.8779	23.222	24.8892	27.2515	29.5697	31.7349	33.7633	35.5956	36.9717	38.0464	39.3479	40.309	40.7888	41.3361	42.2732	43.2804	44.0182	43.498	42.5189	42.2678	42.39	41.5416	39.5353	37.1852	34.5685	31.2057	27.4035	24.6931	23.789
1.25279	1.72638	2.10071	2.74407	3.39546	3.82053	4.42166	4.98293	5.2393	5.91455	6.98872	7.8216	9.36817	12.2595	14.9188	16.5877	17.9486	19.5497	20.8363	21.9451	22.8308	23.0675	23.4643	25.1351	27.5412	29.7714	32.0526	34.1821	35.9246	37.267	38.4058	39.6726	40.5904	41.1662	41.7482	42.7071	43.8459	44.5436	43.9362	43.0982	42.6868	42.8339	41.9176	39.9964	37.5997	34.9819	31.4869	27.5774	24.8783	23.988
1.20869	1.56552	2.07073	2.72253	3.23313	3.78511	4.27751	4.71864	5.1051	5.86173	6.88305	7.73198	9.11915	11.9959	14.8776	16.4167	17.7234	19.2201	20.5269	21.5992	22.5372	22.738	23.103	24.6354	26.9657	29.2821	31.4135	33.6116	35.2884	36.5524	37.6537	39.0081	39.9235	40.4625	40.9881	41.8677	42.7927	43.646	43.089	42.189	41.8232	41.9892	41.1137	39.126	36.9417	34.2311	30.7715	27.08	24.4645	23.5135
1.19105	1.59769	2.20563	2.67227	3.08493	3.523	4.14057	4.67459	5.01564	5.62022	6.51321	7.3511	8.85549	11.6539	14.1909	15.6403	16.9228	18.3136	19.7426	20.8195	21.5213	21.7724	22.1124	23.5916	25.9537	28.1356	30.139	32.1891	33.8642	35.1196	36.2052	37.3923	38.2696	38.7287	39.3559	40.2252	41.2027	41.9252	41.3277	40.4595	40.207	40.3731	39.4628	37.5533	35.2798	32.7127	29.4647	25.9112	23.3175	22.3157
1.19105	1.38857	1.95832	2.68663	3.1061	3.523	4.1694	4.60852	4.85162	5.50702	6.51321	7.29882	8.65041	11.4758	13.9711	15.4824	16.8603	18.3489	19.61	20.6852	21.5261	21.7092	22.1337	23.6642	25.919	28.0721	30.1098	32.1818	33.8389	35.094	36.12	37.3055	38.2388	38.7445	39.2599	40.1725	41.1454	41.8425	41.3903	40.5694	40.113	40.3946	39.5579	37.6869	35.3695	32.9109	29.3903	25.802	23.2032	22.331
1.14695	1.45292	1.89837	2.50712	3.02847	3.55133	4.08291	4.63054	4.98582	5.50702	6.58114	7.30629	8.66506	11.3831	14.0673	15.4824	16.9228	18.3489	19.6045	20.6956	21.4587	21.7273	22.1082	23.5916	25.9074	28.1356	30.1354	32.1313	33.8497	35.043	36.12	37.3848	38.2966	38.9292	39.3319	40.2455	41.3052	42.0245	41.4571	40.6202	40.2242	40.3817	39.5492	37.6179	35.3908	32.8181	29.473	25.8586	23.2899	22.4152
1.07639	1.54943	2.08572	2.62918	3.02847	3.49466	4.14057	4.51308	4.74725	5.40136	6.4	7.20173	8.72365	11.4473	14.0535	15.614	16.9604	18.4196	19.6432	20.7214	21.5502	21.8085	22.2187	23.7407	26.0233	28.2402	30.3253	32.3515	34.1064	35.4222	36.4312	37.6943	38.6089	39.1179	39.7359	40.6024	41.5511	42.3016	41.766	40.9669	40.6047	40.761	39.8474	37.9066	35.7113	33.1598	29.7211	26.0366	23.4909	22.6065
1.10285	1.34836	2.00328	2.59328	3.08493	3.54425	4.06129	4.60852	4.82925	5.6806	6.53586	7.19427	8.62112	11.5114	13.9642	15.5876	17.1355	18.4313	19.7316	20.8918	21.6898	21.9754	22.4058	23.7891	26.1082	28.3821	30.4421	32.5285	34.2112	35.4623	36.5646	37.8567	38.8055	39.287	39.8359	40.8011	41.7764	42.5167	42.0122	41.0642	40.6902	40.9377	39.9512	38.1221	35.8822	33.2315	29.8865	26.1619	23.6092	22.6831
1.24397	1.39661	1.9808	2.49276	3.06375	3.35298	3.96039	4.40295	4.86653	5.45419	6.59624	7.23161	8.59915	11.3903	13.8887	15.2718	16.6601	17.9899	19.1903	20.3445	21.1746	21.4069	21.7468	23.2773	25.5907	27.7397	29.7593	31.8569	33.3943	34.5945	35.694	36.962	37.861	38.3159	38.8518	39.7224	40.7643	41.4082	40.9271	40.0578	39.6641	39.8344	38.9528	37.1181	34.8953	32.2698	29.0016	25.4299	22.8721	22.0402
1.03229	1.38053	1.92834	2.44249	3.02847	3.45215	4.02525	4.54978	4.65033	5.34853	6.46038	7.07477	8.57717	11.148	13.6277	15.2916	16.5288	17.931	19.1074	20.2877	20.958	21.2941	21.6448	23.1121	25.3242	27.4111	29.4562	31.5211	33.1232	34.3503	35.3346	36.5316	37.4948	37.9503	38.4998	39.3858	40.3381	41.04	40.5765	39.6307	39.3648	39.5155	38.6201	36.726	34.5449	32.0631	28.7617	25.2439	22.679	21.7608
1.03229	1.39661	2.00328	2.48558	2.94378	3.30339	3.90993	4.43232	4.77707	5.34853	6.30942	6.94781	8.44534	11.1338	13.6003	15.1271	16.2786	17.672	18.9693	19.9985	20.8136	21.0278	21.3472	22.8099	25.0731	27.2243	29.1786	31.16	32.7942	34.0805	35.0123	36.2975	37.0823	37.5533	38.0917	39.0248	39.9734	40.6264	40.0715	39.2374	38.9543	39.0759	38.2225	36.4072	34.2245	31.7004	28.4433	24.8921	22.5213	21.5427
0.891168	1.29205	1.83841	2.5143	2.85909	3.1617	3.75137	4.37359	4.56832	5.15986	6.26414	6.85073	8.29886	10.9699	13.511	14.9428	16.0784	17.4425	18.6987	19.7971	20.515	20.7616	21.0879	22.5802	24.8259	26.8807	28.9303	30.9362	32.4002	33.7305	34.7382	35.9238	36.8355	37.3135	37.8197	38.6842	39.6947	40.3948	39.7835	38.9668	38.6807	38.8431	37.894	36.1142	33.9212	31.4431	28.191	24.7101	22.2218	21.3207
1.12049	1.31618	1.65855	2.30606	2.78851	3.22546	3.79462	4.13866	4.43412	5.08439	5.99242	6.79098	8.22562	10.8416	13.2569	14.6007	15.9096	17.2718	18.4556	19.4925	20.3369	20.5631	21.0454	22.4834	24.6599	26.7239	28.7294	30.6726	32.281	33.4971	34.5196	35.7274	36.6004	37.1169	37.6117	38.5139	39.4366	40.0473	39.6708	38.8906	38.484	38.6018	37.76	35.9117	33.7631	31.3207	28.0173	24.4998	22.0484	21.1102
0.758866	1.08293	1.69602	2.30606	2.66148	3.12628	3.76579	4.24144	4.59068	5.25797	6.0679	6.7163	8.18167	10.7134	13.1608	14.5941	15.8345	17.2423	18.5661	19.5854	20.4236	20.7029	21.0624	22.5076	24.7641	26.9255	28.8974	30.8351	32.4147	33.694	34.7234	35.9955	36.9358	37.3646	37.9517	38.8505	39.7316	40.4899	39.963	39.1021	38.7876	38.9724	38.1317	36.1917	33.934	31.422	28.1621	24.6049	22.1745	21.2174
0.838248	1.16336	1.80843	2.28452	2.61913	3.15462	3.75137	4.18271	4.45649	4.89571	5.7509	6.72376	8.11576	10.6065	12.941	14.4954	15.6969	17.0187	18.2899	19.3117	20.0577	20.3284	20.7478	22.2417	24.4204	26.5745	28.5213	30.4704	32.1581	33.3513	34.3603	35.5613	36.4115	36.8338	37.4556	38.3354	39.3218	40.0018	39.5498	38.7003	38.4028	38.5501	37.6606	35.7178	33.5965	31.1309	27.8271	24.3744	21.8198	20.9342
0.767687	1.09098	1.7185	2.27016	2.64736	3.06961	3.52794	4.00651	4.56086	4.87307	5.81128	6.49225	7.75688	10.3571	12.7419	14.2059	15.3466	16.6773	17.9199	19.0071	19.7592	20.1028	20.4545	21.8669	24.0535	26.0666	27.9808	29.9794	31.5327	32.6841	33.7824	34.995	35.8563	36.2992	36.8196	37.6906	38.5842	39.2903	38.9196	38.0195	37.6973	37.9596	37.034	35.1878	33.024	30.5531	27.2647	23.9336	21.4335	20.6013
0.935269	1.14728	1.58361	2.15528	2.5909	2.9846	3.52074	3.91842	4.22537	4.71458	5.67542	6.44744	7.81547	10.3714	12.5839	13.9757	15.2466	16.6184	17.8646	18.8677	19.6051	19.8501	20.3015	21.7581	23.8874	25.9844	27.8384	29.7953	31.3628	32.6075	33.5564	34.7195	35.6636	36.1576	36.6675	37.5406	38.4531	39.0918	38.6942	37.8842	37.5434	37.77	36.7919	35.0155	32.7847	30.397	27.1407	23.695	21.201	20.3563
0.750046	1.16336	1.67354	2.22708	2.68971	2.87833	3.52074	3.99917	4.19555	4.79005	5.58485	6.38769	7.69829	9.9581	12.5152	13.9691	15.0527	16.4301	17.7431	18.656	19.504	19.7644	20.1272	21.4518	23.6904	25.7454	27.6412	29.5497	31.0917	32.3158	33.3527	34.5684	35.3706	35.8431	36.3795	37.2445	38.158	38.8974	38.352	37.4783	37.2527	37.4037	36.5931	34.7828	32.5412	30.1144	26.9008	23.4564	21.1024	20.1803
0.891168	1.01055	1.4637	2.16964	2.44269	2.70831	3.31172	3.81563	4.0539	4.70704	5.36597	6.1039	7.49321	9.9296	12.1787	13.4427	14.7712	15.9356	17.1632	18.2636	18.9359	19.1462	19.5745	20.9642	23.111	25.1628	26.9912	28.824	30.4302	31.5502	32.6303	33.7152	34.6034	35.0922	35.6074	36.4335	37.445	38.0163	37.6216	36.8778	36.5216	36.6322	35.8239	33.9512	31.8149	29.4311	26.2061	22.874	20.5033	19.6063
1.04535	1.35784	1.72858	2.20496	2.6152	3.02249	3.49014	3.98546	4.28965	4.78365	5.60771	6.42387	7.67963	10.0379	12.373	13.7154	14.86	16.176	17.4108	18.3099	19.0658	19.3695	19.7307	21.1188	23.2353	25.2737	27.1588	29.0601	30.6029	31.8136	32.8377	34.0048	34.8503	35.3571	35.8961	36.7093	37.6711	38.3169	37.8297	37.0367	36.8101	36.9535	36.0527	34.2622	32.0847	29.6638	26.4932	23.0923	20.6728	19.7836
0.957152	1.26534	1.65739	2.14752	2.64343	2.92685	3.4577	3.89369	4.21883	4.74969	5.55865	6.25957	7.52583	9.90251	12.1807	13.6101	14.7192	16.0318	17.1844	18.1783	18.9454	19.2455	19.5883	20.9757	23.1117	25.1094	26.9908	28.8868	30.3896	31.5621	32.5691	33.7594	34.5939	35.1232	35.628	36.466	37.3986	38.077	37.6294	36.8316	36.5386	36.6755	35.8258	34.0726	31.9074	29.4466	26.2741	22.9143	20.5447	19.6841
0.983612	1.29752	1.6986	2.16547	2.60815	2.88789	3.42167	3.92673	4.25983	4.71572	5.58506	6.28198	7.59907	10.0343	12.2597	13.5312	14.7224	16.0612	17.1926	18.2015	18.9815	19.2838	19.6499	21.0906	23.2295	25.2046	27.0547	28.9536	30.5234	31.6824	32.721	33.8802	34.7346	35.2608	35.808	36.6424	37.6178	38.292	37.8339	37.079	36.7823	36.8997	36.044	34.2364	32.0463	29.6069	26.4415	23.0155	20.6314	19.7931
1.01448	1.23317	1.58244	2.12957	2.55169	2.88435	3.4541	3.86065	4.148	4.68176	5.57374	6.2409	7.46357	9.88826	12.1361	13.4983	14.6973	16.0318	17.1181	18.106	18.8876	19.2003	19.5628	20.9576	23.0286	25.0832	26.9944	28.8398	30.3643	31.5621	32.5617	33.7462	34.644	35.1369	35.63	36.4599	37.4478	38.1369	37.7129	36.931	36.6113	36.7057	35.8863	34.1179	31.9672	29.4972	26.3154	22.9204	20.525	19.6573
0.970382	1.19698	1.55621	2.02545	2.38936	2.69662	3.29554	3.78724	4.03244	4.58743	5.41901	6.09527	7.33174	9.62463	11.7859	13.0706	14.2501	15.5403	16.7093	17.6774	18.3797	18.6746	19.076	20.4236	22.4841	24.4577	26.2696	28.1087	29.6161	30.8201	31.8115	32.9383	33.8036	34.2838	34.8479	35.6833	36.6036	37.2662	36.8114	36.0725	35.7604	35.889	35.0349	33.2647	31.1277	28.7485	25.6517	22.3158	19.9397	19.0832
0.961562	1.201	1.54872	2.05777	2.43524	2.70724	3.19463	3.69547	3.87588	4.31951	5.23032	5.87122	7.09004	9.43582	11.5146	12.8008	13.9874	15.2313	16.3917	17.3211	18.0643	18.3588	18.7593	20.0771	22.1191	24.0319	25.8861	27.6682	29.1299	30.3407	31.2947	32.4532	33.2947	33.7826	34.3098	35.1581	36.0258	36.6809	36.2292	35.5376	35.2602	35.346	34.4947	32.7628	30.6343	28.2487	25.1782	21.875	19.5574	18.7465
0.886591	1.18893	1.52624	1.9716	2.36113	2.64348	3.14779	3.57433	3.87588	4.32328	5.12466	5.77413	6.9692	9.22563	11.3257	12.5508	13.7185	14.984	16.0935	17.0552	17.7538	18.0045	18.398	19.7648	21.7637	23.6753	25.4643	27.2223	28.7106	29.8758	30.8539	31.9926	32.8167	33.3265	33.8338	34.6248	35.5443	36.1804	35.7429	35.028	34.7813	34.8676	34.0106	32.263	30.16	27.8248	24.7605	21.5211	19.2026	18.3868
0.913051	1.08437	1.42881	1.9716	2.36113	2.67536	3.11175	3.48257	3.7976	4.30441	5.15485	5.73306	6.90328	9.11875	11.2502	12.5442	13.6778	14.8928	16.0272	16.9416	17.684	18.0068	18.381	19.6821	21.7	23.6099	25.4424	27.2097	28.6835	29.8193	30.7742	31.9077	32.7357	33.2145	33.7378	34.5538	35.4623	36.1142	35.6636	35.0048	34.6809	34.762	33.9307	32.2048	30.0895	27.7426	24.6716	21.42	19.1435	18.2853
0.948332	1.15274	1.54497	1.95006	2.32938	2.69307	3.11535	3.57433	3.81251	4.37988	5.17749	5.90109	7.03511	9.32538	11.4082	12.6824	13.8467	15.0812	16.215	17.1197	17.891	18.1986	18.6127	19.9542	21.9974	23.9031	25.6981	27.4913	29.0233	30.1802	31.1539	32.272	33.1135	33.6371	34.1438	35.0101	35.8967	36.4927	36.0914	35.3811	35.0849	35.2016	34.3348	32.5689	30.4591	28.1454	25.0273	21.7213	19.3879	18.5704
0.886591	1.09644	1.42132	1.93211	2.33643	2.66119	3.13337	3.55231	3.80505	4.35724	5.09069	5.7704	6.91427	9.16863	11.2708	12.5903	13.756	14.9487	16.0852	17.0242	17.7634	18.1061	18.4724	19.8192	21.8217	23.7481	25.5702	27.3595	28.8154	29.9761	30.965	32.1059	32.9786	33.415	33.9698	34.7931	35.7	36.3583	35.9787	35.2078	34.9182	35.0637	34.1921	32.5086	30.3651	27.9977	24.8784	21.6061	19.3169	18.4882
0.85572	1.12057	1.44755	1.86748	2.28703	2.62577	3.08652	3.41282	3.67831	4.23272	4.95861	5.67705	6.83004	8.97625	11.0442	12.3501	13.4527	14.7045	15.809	16.6886	17.4264	17.727	18.1535	19.4867	21.4451	23.3373	25.1722	26.9082	28.3781	29.493	30.4686	31.5717	32.4485	32.955	33.5057	34.2679	35.1407	35.7978	35.3903	34.6855	34.4179	34.4776	33.6044	31.9614	29.8845	27.5127	24.4297	21.1895	18.9464	18.1189
0.80721	1.10448	1.41757	1.84953	2.22704	2.51597	2.97121	3.37611	3.64104	4.13838	4.79633	5.54262	6.63961	8.77674	10.8038	12.0376	13.1212	14.3395	15.4113	16.3349	17.099	17.3547	17.739	19.0333	20.9797	22.835	24.577	26.3215	27.7364	28.844	29.8481	30.928	31.7411	32.2081	32.7636	33.5177	34.3764	35.0284	34.6223	33.918	33.6697	33.7471	32.8956	31.2203	29.1902	26.8779	23.8528	20.6739	18.4222	17.6157
0.86013	1.06829	1.38759	1.79568	2.07883	2.39908	2.8703	3.27333	3.58139	4.10819	4.8303	5.41566	6.56271	8.69837	10.7214	11.8698	12.9366	14.1453	15.207	16.118	16.8848	17.1291	17.5095	18.8298	20.7267	22.553	24.3086	25.9568	27.3714	28.4466	29.4257	30.5316	31.3248	31.7776	32.3376	33.0635	34.0035	34.6169	34.1966	33.5311	33.2657	33.3075	32.5002	30.8109	28.7587	26.4941	23.4993	20.3524	18.1463	17.3516
0.785159	1.0522	1.37261	1.76337	2.16352	2.44867	2.84147	3.24397	3.53293	3.99499	4.78124	5.41192	6.5444	8.69481	10.7352	11.9784	13.043	14.1924	15.2981	16.2316	16.9353	17.2374	17.6179	18.8439	20.8194	22.6632	24.3688	26.1301	27.5069	28.6052	29.5962	30.675	31.5291	32.0036	32.5076	33.2805	34.1756	34.7885	34.4074	33.6706	33.411	33.5488	32.6709	31.0199	28.9595	26.6311	23.6212	20.506	18.2725	17.4741
0.798389	1.09242	1.41382	1.83517	2.19175	2.46638	2.85228	3.35409	3.61494	4.06668	4.85671	5.48287	6.60299	8.76606	10.8279	12.0672	13.1305	14.2836	15.403	16.3375	17.0581	17.3841	17.7667	19.0817	21.0202	22.919	24.6938	26.4316	27.8485	29.0135	30	31.0828	31.9647	32.4459	32.9677	33.7651	34.6796	35.2787	34.8936	34.2457	33.969	34.0229	33.183	31.4874	29.3739	27.0234	24.012	20.7891	18.5346	17.7706
0.83367	1.06024	1.35762	1.72029	2.03649	2.37428	2.84147	3.28068	3.54039	3.96857	4.67179	5.31483	6.39792	8.5238	10.4708	11.6626	12.7021	13.9128	14.9529	15.8676	16.5718	16.8561	17.2629	18.5397	20.4389	22.258	23.9744	25.6788	27.093	28.1659	29.1497	30.188	30.9874	31.5201	32.0656	32.8283	33.7187	34.3211	33.9337	33.2478	32.9771	33.0791	32.23	30.5416	28.4724	26.2241	23.2842	20.1401	17.9256	17.1736
0.789569	0.903405	1.34638	1.68438	2.03649	2.31053	2.68651	3.14119	3.34282	3.78745	4.53594	5.19908	6.20383	8.3528	10.2407	11.3895	12.4738	13.6067	14.6601	15.5655	16.2468	16.547	16.8803	18.0924	20.0295	21.7575	23.5052	25.1607	26.5093	27.577	28.5237	29.5878	30.3783	30.8911	31.3675	32.1794	33.0507	33.62	33.2638	32.5796	32.2887	32.4068	31.5558	29.919	27.8871	25.5893	22.697	19.6366	17.4763	16.7183
0.683728	0.89134	1.25645	1.65207	1.98003	2.2751	2.6757	3.00904	3.38383	3.78367	4.54348	5.18041	6.18918	8.14261	10.1343	11.2547	12.3268	13.4272	14.4558	15.4235	16.0952	16.4229	16.7825	17.9896	19.8886	21.7127	23.3591	25.0632	26.4026	27.4476	28.4051	29.4896	30.2684	30.7535	31.2534	31.9665	32.8643	33.4545	33.1032	32.4401	32.1605	32.2301	31.4024	29.7854	27.8017	25.5218	22.5812	19.5456	17.3896	16.6379
0.696958	0.991879	1.25645	1.69156	2.0012	2.26448	2.70453	3.17055	3.39128	3.84405	4.63406	5.23268	6.30637	8.30292	10.1995	11.3698	12.4112	13.5832	14.696	15.5526	16.2926	16.5673	16.9398	18.2455	20.1319	21.933	23.6421	25.3376	26.7044	27.8177	28.7367	29.8086	30.6231	31.1348	31.6435	32.441	33.313	33.9323	33.4996	32.8714	32.6094	32.6524	31.8843	30.2034	28.167	25.8761	22.9658	19.8408	17.6024	16.835
0.767519	0.983836	1.23771	1.65925	2.03649	2.33532	2.7658	3.16688	3.41365	3.88556	4.61141	5.22895	6.30271	8.42049	10.3094	11.508	12.6333	13.848	14.8424	15.7256	16.4514	16.7817	17.129	18.4208	20.3231	22.1048	23.9014	25.612	27.028	28.1367	29.0534	30.1635	31.026	31.4945	32.0155	32.8039	33.6552	34.3066	33.9358	33.2689	33.022	33.0446	32.2041	30.5847	28.5002	26.222	23.2056	20.0511	17.8468	17.1029
0.82485	0.959706	1.24895	1.61258	1.92357	2.24323	2.62165	3.0641	3.272	3.75726	4.40008	5.07212	6.20017	8.22811	10.0209	11.2218	12.2987	13.4301	14.4751	15.3951	16.0687	16.3733	16.7953	18.0319	19.8982	21.666	23.3408	24.9928	26.4117	27.5005	28.4311	29.4688	30.2993	30.7928	31.2915	32.0821	32.9196	33.5207	33.1908	32.5141	32.2374	32.3076	31.4716	29.8027	27.8252	25.5746	22.6288	19.5314	17.362	16.5824
0.692548	0.871233	1.20773	1.54437	1.87417	2.18655	2.59642	2.99436	3.23845	3.70065	4.35479	5.05718	6.07932	7.99654	9.83552	11.0046	12.0078	13.1652	14.1851	15.0104	15.7774	16.0958	16.4509	17.6814	19.5274	21.2496	22.9318	24.5433	25.9201	26.9116	27.8272	28.9441	29.7461	30.1795	30.7114	31.4799	32.2906	32.9271	32.5794	31.8692	31.6089	31.6978	30.8773	29.2533	27.2783	25.0789	22.1346	19.0845	16.96	16.2705
0.688138	0.903405	1.17776	1.54078	1.88122	2.17238	2.55318	2.91727	3.1117	3.62141	4.31328	4.87794	5.97312	7.91817	9.73251	10.873	11.964	13.0446	14.0995	14.9459	15.5896	15.9243	16.3064	17.5161	19.3246	21.0647	22.7218	24.3664	25.7339	26.7804	27.6494	28.6836	29.5283	29.9692	30.5054	31.2913	32.1226	32.7058	32.3853	31.7276	31.4358	31.4974	30.6828	29.0637	27.1202	24.8849	22.0064	18.9713	16.893	16.1251
0.652857	0.851125	1.13279	1.45102	1.86005	2.2078	2.55318	2.92094	3.21981	3.595	4.30196	4.91902	5.89256	7.79348	9.66384	10.7776	11.7545	12.9151	13.9117	14.7781	15.5246	15.8138	16.2171	17.4114	19.2223	20.9471	22.6123	24.2273	25.5676	26.5926	27.5197	28.5798	29.3933	29.8571	30.3453	31.0439	31.9505	32.5611	32.2392	31.5521	31.2904	31.3423	30.497	28.9582	26.9814	24.7268	21.8368	18.8358	16.7353	16.0084
0.657267	0.806888	1.0616	1.47974	1.80712	2.05195	2.51714	2.8255	3.06697	3.49689	4.24158	4.81446	5.73875	7.68304	9.40631	10.5441	11.5919	12.7356	13.7294	14.5819	15.3224	15.6084	16.0131	17.2179	18.9886	20.7025	22.3731	23.9854	25.32	26.3666	27.2511	28.3136	29.1543	29.6291	30.1333	30.8716	31.7025	32.2715	31.9659	31.3723	31.083	31.1225	30.3393	28.6889	26.7507	24.5559	21.6549	18.6255	16.5678	15.8381
0.674908	0.86319	1.11406	1.46538	1.83535	2.14405	2.54237	2.86221	3.09679	3.595	4.20761	4.79206	5.81199	7.69729	9.43722	10.6	11.6075	12.762	13.7598	14.5845	15.3008	15.6378	16.0216	17.2078	19.0118	20.7099	22.3859	24.0053	25.3291	26.3702	27.2752	28.3438	29.1158	29.6134	30.1513	30.8878	31.7087	32.3542	31.9972	31.3385	31.083	31.1483	30.3349	28.7514	26.8105	24.5433	21.6797	18.6619	16.6052	15.8362
0.674908	0.81091	1.09907	1.47974	1.78242	2.0732	2.52795	2.85487	3.04833	3.51198	4.15855	4.72484	5.79368	7.69373	9.47155	10.5474	11.6013	12.712	13.7405	14.6258	15.2815	15.5701	15.9833	17.1817	18.9886	20.6969	22.3494	23.9547	25.3092	26.3593	27.2585	28.3023	29.083	29.5367	30.0873	30.8736	31.7128	32.2674	31.9304	31.3279	31.0681	31.1117	30.2982	28.6695	26.7272	24.5074	21.6363	18.6457	16.5855	15.7807
0.648447	0.770694	1.13654	1.44743	1.81418	2.05195	2.36218	2.70804	2.97751	3.46292	4.15478	4.69497	5.65819	7.56904	9.37541	10.4158	11.4261	12.5148	13.5085	14.3753	15.0721	15.3873	15.7686	16.952	18.7453	20.4597	22.0828	23.693	24.9766	26.0166	26.9122	27.9342	28.7611	29.2419	29.7433	30.5005	31.3563	31.9592	31.6278	30.9791	30.7367	30.782	30.0065	28.3937	26.4132	24.2037	21.3509	18.3485	16.3057	15.5817
0.652857	0.794824	1.0616	1.35408	1.68361	1.93152	2.37299	2.69336	2.97751	3.42519	4.0944	4.61655	5.61791	7.41228	9.13162	10.225	11.2573	12.2823	13.2682	14.1146	14.8097	15.1076	15.5029	16.6739	18.4537	20.1572	21.7724	23.3319	24.6151	25.6903	26.5602	27.5737	28.3833	28.8468	29.3372	30.0868	30.9198	31.5001	31.2042	30.5752	30.2921	30.3467	29.5592	27.9585	26.0842	23.8747	21.0263	18.1261	16.0653	15.3195
0.613167	0.734501	0.971665	1.31459	1.69773	1.92798	2.34056	2.65665	2.91786	3.31576	4.02269	4.57174	5.50072	7.29116	9.04577	10.123	11.1634	12.2352	13.1578	14.0242	14.7278	15.0286	15.4073	16.555	18.2876	19.9835	21.5825	23.1207	24.4001	25.4077	26.2861	27.3018	28.0807	28.5991	29.0472	29.7746	30.635	31.1878	30.862	30.2771	30.0077	30.0321	29.248	27.6914	25.7702	23.6364	20.7968	17.9077	15.8662	15.1454
0.613167	0.774716	1.09532	1.36485	1.70126	2.00236	2.32254	2.71538	2.9626	3.3384	4.02269	4.59041	5.60692	7.42297	9.19686	10.2019	11.2791	12.3588	13.3511	14.1714	14.8265	15.1504	15.5391	16.7243	18.502	20.1721	21.7468	23.3861	24.6748	25.703	26.5936	27.6511	28.4026	28.9175	29.4012	30.1294	30.9588	31.5084	31.2188	30.5837	30.3434	30.3941	29.611	28.0275	26.1291	23.9886	21.1256	18.12	16.0534	15.3234
0.626397	0.798845	0.994148	1.33254	1.65185	1.97048	2.31173	2.62728	2.83958	3.3384	3.97363	4.5456	5.57396	7.29116	9.03547	10.1493	11.0946	12.2087	13.1633	13.9958	14.6821	15.0286	15.4137	16.5873	18.332	19.9854	21.5953	23.1622	24.4525	25.4843	26.3565	27.4151	28.1963	28.6679	29.1792	29.8881	30.7252	31.3264	31.0185	30.368	30.1702	30.2023	29.3906	27.8357	25.9219	23.7018	20.9002	17.9238	15.9175	15.1933
0.657267	0.778737	1.06534	1.32536	1.57422	1.86068	2.32254	2.62361	2.79858	3.27048	3.88306	4.44105	5.42748	7.15578	8.83289	9.90914	10.857	11.9998	12.9368	13.7531	14.4173	14.7263	15.1352	16.3052	17.9902	19.6549	21.2301	22.7524	24.0675	25.0632	25.9304	26.9489	27.7337	28.2256	28.7351	29.4948	30.2662	30.8341	30.5761	29.9452	29.6743	29.6916	28.926	27.3467	25.4562	23.318	20.5239	17.5781	15.614	14.8795
0.502915	0.637984	0.956677	1.311	1.55658	1.82171	2.19281	2.50982	2.77249	3.20633	3.77362	4.28421	5.25536	7.01684	8.65433	9.68214	10.6162	11.6319	12.6717	13.4949	14.1356	14.4397	14.8249	15.9405	17.6542	19.3076	20.8503	22.3589	23.6265	24.6147	25.5155	26.5166	27.2904	27.7087	28.2411	28.9757	29.795	30.3564	30.0502	29.4673	29.1783	29.2736	28.4938	26.9503	25.0417	22.8856	20.1393	17.3253	15.3144	14.6001
0.533785	0.698307	0.97916	1.25715	1.52835	1.76858	2.182	2.53184	2.7203	3.1384	3.76607	4.26181	5.26269	6.93134	8.53415	9.57029	10.5911	11.5995	12.5999	13.3839	14.0514	14.3856	14.7909	15.9324	17.6291	19.2403	20.7791	22.3354	23.6048	24.6147	25.434	26.4279	27.1863	27.6792	28.195	28.9148	29.6761	30.253	30.0085	29.3785	29.1526	29.2046	28.4052	26.8555	24.999	22.8414	20.0669	17.1696	15.2257	14.5121
0.507325	0.718414	0.975412	1.22843	1.51423	1.79692	2.16038	2.46944	2.7203	3.10067	3.71701	4.30288	5.24804	6.97053	8.65433	9.6953	10.6349	11.6761	12.633	13.3943	14.0851	14.4352	14.7994	15.9385	17.6735	19.2627	20.7992	22.3643	23.6356	24.6129	25.4803	26.4958	27.2846	27.7558	28.2871	28.9939	29.7171	30.3626	30.0544	29.461	29.2189	29.2865	28.4809	26.9934	25.0802	22.9004	20.1331	17.2586	15.2652	14.5312
0.507325	0.674178	0.971665	1.27151	1.52835	1.71191	2.0811	2.44375	2.6532	3.0252	3.63399	4.17966	5.09057	6.86721	8.50325	9.5045	10.4692	11.5142	12.4563	13.2729	13.9647	14.2683	14.6208	15.7934	17.4784	19.0797	20.5947	22.117	23.3807	24.3504	25.2395	26.2335	26.953	27.4236	27.959	28.6837	29.4569	30.0523	29.7247	29.1607	28.9239	28.9719	28.1784	26.681	24.7769	22.6389	19.9181	17.0503	15.1193	14.3705
0.547016	0.734501	0.975412	1.18534	1.42954	1.72608	2.07028	2.36299	2.66811	3.06671	3.64154	4.13485	5.07592	6.71758	8.27663	9.32685	10.2784	11.2758	12.263	13.0715	13.7072	14.0562	14.4125	15.5456	17.2139	18.8071	20.2952	21.8137	23.0283	24.0204	24.8691	25.8654	26.6562	27.1052	27.599	28.3086	29.086	29.6242	29.3616	28.7696	28.537	28.6164	27.8002	26.2695	24.4479	22.3373	19.5893	16.8157	14.8217	14.1504
0.498505	0.642005	0.945436	1.18534	1.44013	1.6942	2.03785	2.35198	2.55628	2.99879	3.55097	4.07884	5.02466	6.66058	8.19078	9.27421	10.1627	11.2523	12.1801	12.9709	13.594	13.9276	14.285	15.3803	17.0401	18.6615	20.1455	21.6079	22.8801	23.8436	24.7172	25.6823	26.4403	26.9342	27.4309	28.1646	28.9283	29.4795	29.1988	28.6618	28.3852	28.4504	27.6533	26.1058	24.262	22.137	19.4487	16.6439	14.737	14.0069
0.397073	0.577661	0.866746	1.16021	1.44366	1.63398	2.00542	2.30059	2.49291	2.88558	3.45662	3.95188	4.86719	6.56439	8.07061	9.08341	9.97505	10.8814	11.8929	12.6481	13.3268	13.6004	14.0087	15.0882	16.7214	18.3123	19.7858	21.2125	22.4319	23.4298	24.2523	25.2179	25.9815	26.4211	26.8909	27.6577	28.4242	28.9789	28.7126	28.1522	27.9042	27.9871	27.2016	25.7115	23.8327	21.7342	19.0703	16.3082	14.4276	13.695
[truncated: 13,247 more rows]
[truncated: 104 more columns]

## Sheet: NormalizedCurves
353	356	359	363	366	369	373	376	379	383	386	389	393	396	399	403	406	409	413	416	419	423	426	430	433	436	440	443	446	450	453	456	460	463	466	470	473	476	480	483	486	490	493	496	500	503	506	510	513	516
[truncated: 5,397 more rows]
[truncated: 107 more columns]

[truncated: 7 more sheets: SalinityTempKastela, SalinityTempStoncica, Chla_picoplankton, KastelLSR_Data, VisLSR_data, EOCPOC, Phytoplankton]
